# Supplementary material for: Perceived Relative Harm of Selected Cigarettes and Non-Cigarette Tobacco Products—A Study of Young People from a Socio-Economically Disadvantaged Rural Area in Poland
Source: PubMed Central journal article supplement (PMC5036718; doi:10.3390/ijerph13090885), 2016-09-06

# Supplementary Materials: The Youth’s Perceived Relative Harm of Selected Cigarettes and Non-Cigarette Tobacco Products—A Study from A Socio-Economically Disadvantaged Rural Area in Poland

Dorota Kaleta, Kinga Polanska, Leokadia Bak-Romaniszyn and Piotr Wojtysiak

Table S1. Perceived harmfulness of tobacco/nicotine products.

| Harmfulness of Selected Products    |       | Menthol Cigarettes |            |              | Slim Cigarettes |            |              | Smokeless Tobacco |            |              | Water Pipe   |            |              | E-Cigarettes |            |              |
|-------------------------------------|-------|--------------------|------------|--------------|-----------------|------------|--------------|-------------------|------------|--------------|--------------|------------|--------------|--------------|------------|--------------|
|                                     |       | Less Harmful       | As Harmful | More Harmful | Less Harmful    | As Harmful | More Harmful | Less Harmful      | As Harmful | More Harmful | Less Harmful | As Harmful | More Harmful | Less Harmful | As Harmful | More Harmful |
| Overall<br>N = 3552                 | n     | 1934               | 1430       | 188          | 2623            | 701        | 228          | 1160              | 1570       | 822          | 1563         | 1482       | 507          | 1875         | 1387       | 290          |
|                                     | %     | 54.4               | 40.3       | 5.3          | 73.8            | 19.7       | 6.4          | 32.7              | 44.2       | 23.1         | 44.0         | 41.7       | 14.3         | 52.8         | 39.0       | 8.2          |
|                                     | 95%CI | 52.8–56.1          | 38.7–41.9  | 4.6–6.1      | 72.4–75.3       | 18.4–21.0  | 5.6–7.3      | 31.1–34.2         | 42.6–45.8  | 21.8–24.6    | 42.4–45.7    | 40.1–43.3  | 13.2–15.5    | 51.1–54.4    | 37.4–40.6  | 7.3–9.1      |
| Smoker (a)<br>N = 443               | n     | 216                | 201        | 26           | 301             | 101        | 41           | 119               | 248        | 76           | 221          | 150        | 72           | 182          | 184        | 77           |
|                                     | %     | 48.7               | 45.4       | 5.9          | 67.9            | 22.8       | 9.3          | 26.9              | 56.0       | 17.1         | 49.9         | 33.9       | 16.2         | 41.1         | 41.5       | 17.4         |
|                                     | 95%CI | 44.0–53.5          | 40.8–50.0  | 3.9–8.6      | 63.4–72.2       | 18.9–26.7  | 6.8–12.4     | 22.8–31.3         | 51.4–60.6  | 13.8–21.1    | 45.1–54.6    | 29.5–38.3  | 13.0–20.1    | 36.5–45.8    | 36.9–46.1  | 14.0–21.3    |
| E-Cigarettes<br>User (b)<br>N = 374 | n     | 205                | 142        | 27           | 259             | 80         | 35           | 106               | 128        | 140          | 191          | 145        | 38           | 198          | 176        | 0            |
|                                     | %     | 54.8               | 38.0       | 7.2          | 69.3            | 21.4       | 9.3          | 28.3              | 34.2       | 37.4         | 51.1         | 38.8       | 10.2         | 52.9         | 47.1       | 0            |
|                                     | 95%CI | 49.6–59.9          | 33.1–42.9  | 4.9–10.5     | 64.3–73.8       | 17.2–25.6  | 6.7–12.9     | 23.9–33.3         | 23.4–39.0  | 32.6–42.6    | 45.9–56.2    | 33.9–43.7  | 7.4–13.8     | 47.8–58.1    | 42.0–52.2  | 0            |
| Dual User (c)<br>N = 601            | n     | 398                | 135        | 68           | 393             | 146        | 62           | 209               | 210        | 182          | 345          | 184        | 72           | 329          | 229        | 43           |
|                                     | %     | 66.2               | 22.5       | 11.3         | 65.4            | 24.3       | 10.3         | 34.8              | 34.9       | 30.3         | 57.4         | 30.6       | 12.0         | 54.7         | 38.1       | 7.2          |
|                                     | 95%CI | 62.3–70.0          | 19.2–25.8  | 8.9–14.2     | 61.4–69.2       | 20.9–27.7  | 8.1–13.1     | 31.0–38.8         | 31.1–38.7  | 26.7–34.2    | 53.3–61.4    | 26.9–34.3  | 9.5–14.9     | 50.7–58.8    | 34.2–42.0  | 5.3–9.6      |
| Non-smoker<br>(d)<br>N = 2134       | n     | 1115               | 952        | 67           | 1670            | 374        | 90           | 726               | 984        | 424          | 806          | 1003       | 325          | 1166         | 798        | 170          |
|                                     | %     | 52.2               | 44.6       | 3.1          | 78.3            | 17.5       | 4.2          | 34.0              | 46.1       | 19.9         | 37.8         | 47.0       | 15.2         | 54.6         | 37.4       | 8.0          |
|                                     | 95%CI | 50.1–54.4          | 42.5–46.7  | 2.5–4.0      | 76.4–80.0       | 15.9–19.1  | 3.4–5.2      | 32.0–36.1         | 44.0–48.2  | 18.2–21.6    | 35.7–39.9    | 44.9–49.1  | 13.8–16.8    | 52.5–56.8    | 35.4–39.5  | 6.9–9.2      |

(a) the youth who indicated traditional cigarette smoking but not e-cigarette use; (b) the youth who used e-cigarettes but did not smoke traditional cigarettes; (c) the youth who smoked traditional cigarettes and used e-cigarettes; (d) neither smokers of traditional cigarettes nor e-cigarette users.

**Table S2.** Mean scores for the perceived harmfulness of the selected tobacco/nicotine products by a participant's cigarette/e-cigarette use status stratified by gender.

| Product *          | Smoker (a)  | E-Cigarettes User (b) | Dual User (c) | Non-Smoker (d) | H (p Value) #   | Z (p Value) ^                                                                       |
|--------------------|-------------|-----------------------|---------------|----------------|-----------------|-------------------------------------------------------------------------------------|
|                    | Mean ± SD   |                       |               |                |                 |                                                                                     |
| Menthol cigarettes |             |                       |               |                |                 |                                                                                     |
| Men                | 2.34 ± 1.07 | 2.34 ± 1.19           | 2.22 ± 1.22   | 2.33 ± 0.98    | 10.69 (0.01)    | (c)-(d): 3.0 (0.01)                                                                 |
| Women              | 2.32 ± 0.93 | 2.14 ± 0.78           | 2.08 ± 0.83   | 2.08 ± 0.92    | 14.19 (0.003)   | (a)-(c): 2.82 (0.03)<br>(a)-(d): 3.44 (0.004)                                       |
| Slim cigarettes    |             |                       |               |                |                 |                                                                                     |
| Men                | 2.00 ± 1.08 | 1.91 ± 1.01           | 2.04 ± 1.01   | 1.91 ± 0.96    | 6.17 (0.10)     |                                                                                     |
| Women              | 2.22 ± 1.32 | 2.1 ± 1.15            | 2.36 ± 1.20   | 1.81 ± 0.95    | 52.26 (<0.001)  | (a)-(d): 3.46 (0.003)<br>(b)-(d): 3.66 (0.002)<br>(c)-(d): 5.73 (p < 0.001)         |
| Smokeless tobacco  |             |                       |               |                |                 |                                                                                     |
| Men                | 2.94 ± 0.88 | 3.14 ± 1.38           | 2.88 ± 1.38   | 2.87 ± 1.11    | 11.50 (0.009)   | (b)-(c): 2.63 (0.049)<br>(b)-(d): 3.19 (0.009)                                      |
| Women              | 2.78 ± 0.76 | 3.01 ± 1.17           | 2.90 ± 0.99   | 2.68 ± 1.02    | 23.26 (<0.001)  | (b)-(d): 3.49 (0.003)<br>(c)-(d): 3.23 (0.0075)                                     |
| Water pipe         |             |                       |               |                |                 |                                                                                     |
| Men                | 2.48 ± 1.00 | 2.50 ± 1.03           | 2.26 ± 1.12   | 2.41 ± 1.07    | 14.91 (0.002)   | (a)-(c): 2.89 (0.02)<br>(b)-(c): 2.86 (0.03)<br>(c)-(d): 3.13 (0.01)                |
| Women              | 2.57 ± 1.03 | 2.32 ± 1.03           | 2.44 ± 1.11   | 2.85 ± 1.16    | 51.99 (<0.001)  | (a)-(d): 3.21 (0.008)<br>(b)-(d): 5.18 (<0.001)<br>(c)-(d): 4.66 (p < 0.001)        |
| e-cigarettes       |             |                       |               |                |                 |                                                                                     |
| Men                | 2.80 ± 1.05 | 2.24 ± 0.80           | 2.24 ± 1.02   | 2.30 ± 1.02    | 50.818 (<0.001) | (a)-(b): 5.05 (p < 0.001)<br>(a)-(c): 6.27 (p < 0.001)<br>(a)-(d): 6.15 (p < 0.001) |
| Women              | 2.58 ± 1.28 | 2.32 ± 0.73           | 2.46 ± 0.91   | 2.26 ± 1.02    | 13.82 (0.0032)  | (a)-(d): 2.66 (0.05)<br>(c)-(d): 2.68 (0.04)                                        |

\* scoring has been given to each product based on their harmfulness compared to traditional cigarettes with 1 = much less harmful; 2 = less harmful; 3 = as harmful; 4 = more harmful; 5 = much more harmful (the points were used as continuous variables to estimate mean rating for each product); SD, standard deviation. (a) the youth who indicated traditional cigarette smoking but not e-cigarette use ( $n = 443$ ); (b) the youth who used e-cigarettes but did not smoke traditional cigarettes ( $n = 374$ ); (c) the youth who smoked traditional cigarettes and used e-cigarettes ( $n = 601$ ); (d) neither smokers of traditional cigarettes nor e-cigarette users ( $n = 2134$ ). # H-statistics in ANOVA Kruskal-Wallis test; ^ z-statistics in Dunnett test.

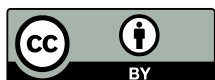

Supplement: ijerph-13-00885-s002.pdf [file ijerph-13-00885-s002.pdf]
