# Supplementary material for: Perceived Relative Harm of Selected Cigarettes and Non-Cigarette Tobacco Products—A Study of Young People from a Socio-Economically Disadvantaged Rural Area in Poland
Source: Int J Environ Res Public Health. 2016 Sep 6;13(9):885. doi: 10.3390/ijerph13090885 (PMC5036718; doi:10.3390/ijerph13090885)
Supplement: Supplementary file 1 [file ijerph-13-00885-s001.xlsx]

## Sheet: Sheet 1
Numer ankiety	Typ szkoły szkoły	Klasa	Pyt. 1	Pyt. 2	Pyt. 3	Pyt. 4	Pyt. 5	Pyt. 6	Pyt. 7	Pyt. 8	Pyt. 9	Pyt. 10	Pyt. 11	Pyt. 12	Pyt. 13	Pyt. 14	Pyt. 15	Pyt. 16	Pyt. 17	Pyt. 18	Pyt. 19	Pyt. 20	Pyt. 21	Pyt. 22	Pyt. 23	Pyt. 24	Pyt. 25	Pyt. 26	Pyt. 27	Pyt. 28	Pyt. 29	Pyt. 30	Pyt. 31	Pyt. 32	Pyt. 33	Pyt. 34	Pyt. 35	Pyt. 36	Pyt. 37	Pyt. 38	Pyt. 39	Pyt. 40	Pyt. 41	Pyt. 42	Pyt. 43 A	Pyt. 43 B	Pyt. 43 C	Pyt. 43 D	Pyt. 43 E
		3	a	g	b	b	b	h1	e	d	b	a	d	d	e	a		b	e	a	a	a	a	a	f	f	a	a	a	a	c	g		a	c	a	c	c	c	c	b	c	c	b	3	3	3	2	2
		3	a	g	g	d	b	h2	e	d	a	e	e	e	e	a		b		c	a	c	b	c	e	b	a	a,b,c,d	a	a	a	g		c	c	a	d	c	b	b	b	d	c	c	5	3	3	4	5
		3	a	b	a	a	a	a	a	a	a	g	a	a	e	a		a	a	a	a	a	a,b,c	a	e	a	a	a	a	a	a	a	a	a	a	a	a	a	b	b	b	b	b	b	1	1	1	1	1
		3	a	e	g	d	g	h3	e	c	a	e	f	b,d,h3	g			c		b	b	b	b	a	a	a	a	a,b,c,d,e2	b	b	a	e	a	b	d	b	d	d	a	b	c	c	c	c	2	3	3	3	3
		2	a	b	g	f	b	h3	e	c	a	a	b,d,e	f	d			e		b	b	b	a	b	c	c	b			a	c	b	a	c	d	a	a	b	a	c	b	b	c	c	5	3	3	4	5
		2	a	f	d	d	b	c	c	d	b	a	d	d	c			b		a	a	a	b	a	c	b	b			a	a	e	a	a	c	a	c	c	b	b	b	d	c	d	5	5	5	5	5
		1	a	g	g	e	b	c	e	e	b	a	g1	g3	e	c	3	b		c	c	c	e	c	f	f	c			a	b	e	a	d	c	a	c	c	c	c	b	c	c	c	4	4	4	4	4
		1	a	g	a	a	a	a	a	a	b	a	a	a	e	c	6	a	e	a	c	c	b	b	e	b	c			b	a	g		a	b	a	b	a	b	b	b	d	c	b	5	5	4	5	5
		1	a	e	a	a	a	a	a	a	b	a	a	a	e	b	3	a	d	a	a	a	b	a	e	a	c			a	a	e	a	b	a	a	a	a	b	b	c	d	c	d	5	5	3	3	5
		3	b	a	a	a	a	a	a	a	b	a	a	a	e	a	3	a	c	a	a	a	b	a	f	f	a	b	c	c	c	e	a	a	a	a	a	a	c	c	c	a	a	a	3	2	3	3	3
		3	b	a	a	a	a	a	a	a	a	a	a	a	g			a	e	c	b	b	d	b	e	e	c			c	a	g		a	a	b	a	a	c	b	c	a	a	c	1	2	3	3	2
		3	a	g	a	a	a	a	a	a	a	g	a	a	d			a	a	a	a	a	b	c	f	a	a	a	a	b	a	d	a	d	c	a	d	c	a	b	c	c	d	a	5	4	5	2	5
		3	b	a	a	a	a	a	a	a	b	a	a	a	d			a	e	c	c	c	e	a	c	f	b			c	a	d	b	d	a	b	c	c	a	c	c	b	b	c	1	2	1	3	2
		3	a	g	b	b	d	b	g	b	a	g	e	e	c			a	c	a	a	a	e	c	f	f	c			c	a	f	c	d	c	b	d	d	b	b	a	d	b	a	1	2	3	4	5
		3	a	f	b	d	g	b	b	b	a	a	b	g	e	b	3	b	e	a	a	a	b	a	b	a	a	a,c,e1	a	a	a	e	b	b	a	a	a	a	b	b	b	d	b	d	5	4	3	5	5
		3	a	b	g	g	b	e	e	d	a	a	b,c,d,e,f	d	d			d		a	a	a	a,b	a	a	a	a	a,b,c,d	a	a	a	e	a	a	d	a	c	d	a	b	a	d	a	d	5	3	3	4	5
		3	a	d	g	f	b	e	e	d	a	g	b,c,e	f	d			b		a	a	b	b	a	e	a	a	a,b,c,d	a	a	a	e	a	d	d	a	c	d	a	b	a	d	a	d	5	3	3	4	5
		3	a	g	f	c	b	e	d	d	a	a	e	g3	e	b		c		a	a	a	a,b	a	e	a	a	c	a	a	a	e	a	c	c	a	c	d	c	c	b	d	c	d	4	3	3	5	5
		3	a	g	b	d	b	e	e	c	a	a	e	f	c			b	b	b	b	a	b	a	a	a	a	a	b	a	a	g		c	c	a	d	d	a	a	a	c	c	a	3	2	3	3	4
		2	a	e	f	d	b	e	c	d	a	e	c	d	e	b	3	d		c	c	b	b	a	c	a	c			b	b	d	a	b	d	a	d	d	b	c	b	c	d	c	4	4	2	4	4
		2	b	a	a	a	a	a	a	a	b	a	a	a	c			a	b	c	c	c	e	a	a	a	a	a	c	a	b	c	b	a	a	a	a	a	c	c	b	c	b	c	4	4	3	4	4
		2	a	g	g	d	b	e	b	d	a	d	e	d	c			c		b	b	a	b	a	a	a	a	a	a	b	c	a	c	c	a	b	b	b	b	c	a	d	c	b	4	4	4	4	4
		2	a	f	b	c	b	b	c	b	a	f	f	e	g			b		a	a	c	a	b	a	a	c			c	b	f		d	c	a	d	d	c	b	c	c	c	b	5	4	3	3	5
		2	b	a	a	a	a	a	a	a	b	a	a	a	g			a	e	c	c	c	e	c	f	f	c			c	c	g		a	a	a	a	a	b	b	b	d	a	d	3	3	3	3	3
		2	a	f	g	e	b	b	e	e	b	e	e	d	g			b		a	a	b	b	a	b	a	a	b	a	a	a	d	a	a	d	a	d	d	b	c	c	c	d	c	4	4	4	4	4
		2	b	a	a	a	a	a	a	a	b	a	a	a	e	b	3	a	e	a	a	a	b	c	f	a	b			a	a	f		a	a	b	a	a	c	b	c	c	c	b	2	3	3	3	3
		2	a	d	g	d	g	h4	c	e	a	a	c	d	d			b		a	a	a	a	a	f	a	a	a,b	a	a	a	c	c	a	c	a	b	d	b	c	b	a	a	c	2	2	3	2	3
		2	a	f	b	c	c	b	c	b	a	a	e	g7	e	b	3	b	a	a	a	a	d	a	a	a	a	b,c,d	a	a	a	e	a	b	b	a	a	b	b	b	b	d	c	c	4	5	4	4	5
		1	a	e	d	d	b	c	e	d	a	g	c	d,e	c			c		a	c	b	d	b	f	a	b			b	b	g		b	d	a	d	c	b	c	b	c	c	c	4	4	3	4	4
		1	a	e	g	d	g	h3	d	b	a	a	c,d,e,f	d	e	b	10	b		b	b	b	b	a	a	a	a	a	c	c	a	d	b	b	d	b	d	d	c	c	b	c	c	c	3	3	3	3	3
		1	b	a	a	a	a	a	a	a	b	a	a	a	a			a	b	c	c	c	a	a	a	a	a	a	b	a	c	g		a	a	a	a	a	b	b	b	c	b	c	4	4	3	4	3
		1	a	c	f	e	b	c	c	e	b	a	e	g3	e	b		c		c	c	c	e	c	f	b	c			a	a	c	a	a	c	a	c	d	c	b	c	d	b	c	4	3	3	2	4
		1	a	f	a	a	a	a	a	a	a	a	a	a	e	b		a	e	a	a	a	a	a	e	f	c			a	b	f		a	a	a	a	b	b	b	b	d	c	c	5	5	3	4	5
		4	b	a	a	a	a	a	a	a	b	a	a	a	c			a	d	b	b	b	d	b	a	f	b			b	c	g		a	d	b	d	d	c	b	a	b	d	c	1	4	3	2	5
		4	b	a	a	a	a	a	a	a	b	a	a	a	d			a	e	a	a	a	a	a	e	f	a	c,d	c	c	c	e	a	d	a	b	a	a	c	c	a	d	b	d	5	4	4	4	5
		4	b	a	a	a	a	a	a	a	b	a	a	a	g			a	e	c	a	c	b	b	a	a	c			b	c	e	a	a	a	a	a	a	b	b	b	d	b	d	5	5	3	4	5
		4	a	g	a	a	a	a	a	a	b	a	a	a	g			a	e	a	c	a	e	a	a	a	c			a	b	g		a	a	a	a	a	b	b	c	d	b	d	5	5	4	5	5
		4	a	g	a	a	a	a	a	a	a	a	a	a	a			a	c	a	a	a	b	a	a	a	a	c,d	a	a	c	e	a	c	a	a	a	b	b	b	b	d	b	d	5	2	3	5	5
		4	a	g	a	a	a	a	a	a	b	a	a	a	g			a	d	c	c	c	d	b	a	a	b			b	c	g		a	c	b	c	d	b	b	b	d	c	d	5	4	3	5	5
		4	a	g	a	a	a	a	a	a	b	a	a	a	g			a	a	c	c	c	d	b	c	f	c			b	b	g		a	d	a	c	c	b	b	b	d	c	c	5	4	3	4	5
		4	a	d	a	a	a	a	a	a	b	a	a	a	g			a	e	c	c	a	d	c	a	a	b			a	b	f	b	a	a	b	a	b	b	b	b	d	c	d	5	5	3	5	5
		4	b	a	a	a	a	a	a	a	b	a	a	a	e	b		a	e	c	c	c	b	c	a	a	a	a,c	c	c	c	f		a	a	a	a	a	b	b	b	d	b	d	5	5	3	5	5
		4	a	g	a	a	a	a	a	a	a	a	a	a	c			a	b	c	c	b	b	b	a	a	b			c	c	c	a	b	b	b	c	c	c	b	c	d	b	c	5	4	4	3	5
		4	a	g	b	d	b	c	e	e	a	c	e	f	f			a	d	a	c	b	b	b	a	a	c			b	b	d	a	d	c	a	d	d	c	c	c	d	b	c	5	5	2	2	5
		4	b	a	a	a	a	a	a	a	a	a	a	a	e	b	3	a	d	c	c	a	b	b	a	a	c			c	a	e	b	c	a	a	a	b	b	b	c	d	b	d	5	5	5	5	5
		4	a	f	a	a	a	a	a	a	a	d	a	a	e	b	4	a	d	c	c	c	b	b	a	a	c			c	b	g		a	a	a	a	a	b	b	b	d	b	d	5	5	3	4	4
		4	b	a	a	a	a	a	a	a	b	a	a	a	e	a		a	e	a	a	a	a,b	a	e	e	c			c	a	e	a	a	a	a	a	a	b	b	c	d	b	d	5	4	4	4	5
		4	b	a	a	a	a	a	a	a	b	a	a	a	e	a		a	e	a	a	a	a,b	a	e	e	c			c	a	e	a	a	a	a	a	a	b	b	c	d	b	d	5	5	4	5	5
		4	a	g	b	d	b	c	e	d	b	a	f	f	e	c		a	e	a	c	a	b	a	f	f	a	b	c	a	c	g	a	b	c	a	d	d	c	b	b	c	b	c	4	3	3	3	3
		4	a	g	g	c	b	b	e	d	b	a	f	d	e	b		b		a	a	a	c	a	b	a	a	c	a	b	a	c	b	c	a	a	a	a	b	b	c	d	c	d	4	5	1	5	5
		4	a	g	g	c	d	b	g	d	b	a	e	f	e	a		b		a	a	a	b	a	e	a	a	a,d	c	a	c	e	a	d	b	a	c	c	c	c	b	c	b	b	4	3	3	5	5
		4	a	f	b	b	d	b	g	d	a	a	e	f	e	c	3	a	e	c	b	a	b	a	f	f	a	c	a	c	b	d	a	a	a	a	a	b	b	b	c	d	b	d	5	5	5	5	5
		4	a	g	a	a	a	a	a	a	b	a	a	a	e	a		a	e	a	a	c	a	a	f	f	a	b	a	a	c	g		c	b	a	c	c	b	b	c	d	d	d	5	5	3	3	3
		4	a	g	a	a	a	a	a	a	a	a	a	a	e	c		a	e	a	c	c	b	a	a	b	b			c	c	g	a	a	b	a	b	b	c	b	c	d	b	d	4	4	3	3	4
		4	b	a	a	a	a	a	a	a	b	a	a	a	e	b	3	a	b	a	a	a	b	a	b	a	a	c	c	c	c	g		a	a	a	a	a	c	b	b	d	b	d	5	4	5	5	5
		4	a	g	a	a	a	a	a	a	b	a	a	a	c			a	d	a	a	a	a	a	f	f	a	b	a	c	a	c	a	a	a	a	a	a	b	b	b	d	a	d	5	5	5	5	5
		4	a	c	e	c	b	h4	e	c	b	a	e	d	e	c	4	b		a	a	a	c	a	a	c	b			b	b	g	b	c	b	a	c	b	c	b	b	c	b	d	5	5	5	5	5
		4	a	b	a	a	a	a	a	a	b	a	a	a	e	c		a	e	a	a	a	a	a	f	a	a	b	a	b	b	d	a	d	a	b	a	a	b	b	b	d	b	d	4	4	3	4	4
		4	b	a	a	a	a	a	a	a	b	a	a	a	g			a	e	a	a	c	b	a	f	f	c			c	c	g		a	a	a	a	b	c	b	b	d	b	c	5	4	5	4	5
		4	a	g	a	a	a	a	a	a	a	a	a	a	e	c	90	a	e	a	a	a	b	a	e	f	a	c	c	c	a	e	a	a	a	a	a	a	b	b	b	d	b	d	5	5	3	5	5
		4	a	c	g	e	b	b	e	d	b	a	f	b	e	b	3	b		c	c	c	b	a	f	a	a	a	a	b	c	e	a	d	a	a	a	a	b	b	b	d	b	c	5	4	2	3	5
		4	a	c	g	e	b	b	e	d	b	a	f	b	g			b		c	c	c	e	a	f	f	c			c	c	g	b	a	a	a	a	a	c	b	b	d	a	c	5	4	3	4	5
		4	a	f	g	e	b	c	b	d	a	a	b	d	c			b		a	a	a	c	a	a	a	a	c	c	a	c	a	b	c	a	a	d	d	c	b	c	c	b	c	3	3	3	3	3
		4	a	g	a	a	a	a	a	a	a	a	a	a	d			a	e	a	c	a	b	a	f	f	b			c	b	a	a	c	a	a	a	b	b	b	b	d	c	c	5	4	3	5	5
		4	a	d	a	a	a	a	a	a	b	a	a	a	e	c		a	e	a	a	a	a	a	b	a	a	b	a	c	a	e	a	a	a	a	a	a	b	b	b	a	a	a	5	5	5	5	5
		4	a	g	a	a	a	a	a	a	a	a	a	a	e	b	5	a	d	a	a	a	a	a	a	a	c			c	c	g		a	a	b	a	a	b	b	b	d	b	d	5	4	3	5	5
		4	b	a	a	a	a	a	a	a	b	a	a	a	e	a	5	a	e	a	a	a	a	a	e	e	c			c	a	e	a	a	a	a	a	a	b	b	c	d	b	d	5	5	5	5	5
		4	a	f	a	a	a	a	a	a	b	a	a	a	e	a	3	a	b	a	c	a	d	b	a	b	a	a	b	a	c	g	a	c	b	a	a	a	c	b	b	d	c	d	4	5	2	4	5
		4	a	f	a	a	a	a	a	a	b	a	a	a	e	a	10	a	e	a	a	a	b	a	d	f	a	c	a	a	c	c	a	b	a	a	a	c	c	a	b	d	b	d	5	5	4	3	5
		3	a	g	a	a	a	a	a	a	b	a	a	a	g			a	e	b	b	b	d	b	a	d	b			b	b	g	b	a	a	a	a	a	c	c	b	d	d	d	5	5	5	5	5
		3	b	a	a	a	a	a	a	a	b	a	a	a	e	b		a	e	c	a	a	b	a	b	a	a	a,d	c	c	c	g	a	a	a	a	a	a	b	b	a	d	b	d	5	5	3	5	5
		3	b	a	a	a	a	a	a	a	b	a	a	a	c			a	e	c	c	a	b	a	d	a	b			c	c	c	a	d	a	b	a	a	b	b	b	d	b	d	5	4	4	4	5
		3	a	g	g	g	b	c	e	e	a	a	e	d	e	b		b		a	a	a	b	a	b	a	a	c	c	a	c	e	a	b	c	b	c	c	c	c	c	c	c	b	4	4	4	5	4
		3	a	e	g	e	b	c	e	e	a	a	d	d	e	b	18	b		a	a	c	b	a	b	a	a	e	c	a	c	e	a	c	d	b	d	d	c	c	b	b	d	a	3	3	5	3	3
		3	a	g	a	a	a	a	a	a	b	a	a	a	e	a		a	e	a	a	a	b	a	b	d	a	b	c	c	c	e	b	a	b	b	c	c	b	b	a	d	b	d	5	5	4	5	5
		3	a	g	a	a	a	a	a	a	b	a	a	a	e	b		a	e	a	a	a	b	a	a	a	a	c	a	c	c	e	a	a	a	a	b	c	b	b	b	d	b	d	5	5	5	5	5
		3	b	a	a	a	a	a	a	a	b	a	a	a	e	a		a	e	a	a	a	a,b	a	e	e	a	a,c	a	c	c	e	a	a	a	a	a	a	b	b	c	d	b	d	5	4	5	5	5
		3	a	g	a	a	a	a	a	a	b	a	a	a	e	b		a	d	a	a	a	e	a	b	a	c			b	c	e	b	a	b	b	b	b	c	b	c	d	b	d	4	4	3	4	5
		3	b	a	a	a	a	a	a	a	b	a	a	a	e	b		a	e	a	a	a	a	a	a	a	a	b,c,d	a	c	c	g	a	a	a	a	a	a	c	b	c	d	a	d	5	4	3	4	5
		3	a	g	a	a	a	a	a	a	b	a	a	a	e	b		a	d	a	a	a	a	a	a	a	a	b,c,d	a	c	c	g	a	a	a	a	a	b	b	b	c	d	a	d	5	4	3	4	5
		3	b	a	a	a	a	a	a	a	b	a	a	a	e	c	3	a	e	c	c	c	b	a	a	f	a	a,b,d	a	c	a	g	a	a	a	a	a	b	b	b	b	d	b	d	5	4	4	4	5
		3	b	a	a	a	a	a	a	a	b	a	a	a	e	c	3	a	e	a	a	a	b	a	a	f	a	a,b	a	a	c	e	a	c	a	a	a	a	b	b	b	d	a	d	5	5	4	5	5
		3	b	a	a	a	a	a	a	a	b	a	a	a	e	c	4	a	e	a	a	a	b	c	b	f	a	c,d	c	c	c	g	a	a	a	a	a	a	b	b	c	d	b	c	5	4	3	4	5
		3	b	a	a	a	a	a	a	a	b	a	a	a	e	a	5	a	e	a	a	a	a,b	a	e	f	a	a,c	a	a	c	e	a	a	a	a	a	a	b	b	c	d	a	d	5	5	5	5	5
		3	b	a	a	a	a	a	a	a	b	a	a	a	d			a	e	a	a	a	a	a	e	a	a	a,c	a	c	c	c	a	a	a	a	a	a	b	b	a	a	a	a	5	5	4	5	5
		3	a	f	a	a	a	a	a	a	b	a	a	a	e	b		a	e	a	a	a	b	a	a	a	a	d	c	c	c	g		c	b	a	b	b	b	b	c	d	b	c	4	3	3	4	5
		3	a	g	g	e	g	b	e	c	a	e	c	d	e	c		b		a	a	a	b	b	a	a	b			b	c	e	b	a	c	b	d	b	b	b	b	d	c	a	5	4	3	4	5
		3	a	g	a	a	a	a	a	a	a	a	a	a	e	c		a	e	a	a	a	b	a	b	d	a	a,c	c	c	c	e	a	a	b	b	c	d	b	b	b	d	a	d	5	5	4	5	5
		3	a	g	a	a	a	a	a	a	a	a	a	a	e	c		a	e	a	a	a	b	a	b	d	a	c	c	c	c	e	a	c	b	b	c	d	b	b	b	d	b	d	5	4	5	5	5
		3	b	a	a	a	a	a	a	a	b	a	a	a	e	a		a	e	a	a	a	a	a	b	a	a	c	c	c	a	g		a	a	a	a	b	b	b	c	d	b	d	5	5	3	5	5
		3	b	a	a	a	a	a	a	a	a	a	a	a	e	c	20	a	c	c	a	c	b	a	a	c	a	c	c	b	c	e	a	a	a	a	b	b	b	b	b	d	a	d	5	5	5	5	5
		3	b	a	a	a	a	a	a	a	a	a	a	a	e	c	20	a	a	c	a	a	e	c	b	c	c			c	c	e	a	c	a	a	b	b	b	b	b	d	b	d	4	4	4	4	4
		3	a	e	g	e	b	c	e	e	a	a	d	d	e	b	18	b		a	a	c	b	a	b	a	a	e	c	a	c	e	a	c	d	b	d	d	c	c	b	b	d	a	3	3	5	3	3
		3	a	f	g	e	b	h	e	d	b	a	b	f	e	b		b		a	a	a	a	a	a	a	a	c	a	c	a	g	a	d	c	a	c	b	c	c	b	d	b	c	4	5	3	4	5
		3	a	c	a	a	a	a	a	a	b	a	a	a	e	b		a	e	a	a	c	e	b	a	a	c			a	a	g		a	b	a	b	b	c	b	c	d	b	d	5	4	3	4	5
		3	b	a	a	a	a	a	a	a	b	a	a	a	e	a	3	a	c	a	a	a	b	a	f	c	a	b	a	c	c	a	a	a	a	a	a	a	b	b	b	d	c	d	5	5	3	5	5
		3	a	e	a	a	a	a	a	a	a	a	a	a	c			a	d	a	c	a	b	a	e	c	a	a	a	a	a	c	a	a	a	a	a	a	b	b	b	d	b	c	5	4	3	4	5
		3	a	g	a	a	a	a	a	a	b	a	a	a	d			a	c	c	c	c	b	a	f	e	a	a	b	b	a	d	b	a	a	a	a	b	b	b	c	d	b	d	4	5	2	3	5
		3	a	g	g	e	b	g	e	e	a	d	g1	g	e	b	10	c		c	b	c	e	a	a	a	a	a	b	a	a	e	b	b	b	b	d	d	b	b	c	d	b	d	5	4	3	2	5
		3	b	a	a	a	a	a	a	a	b	a	a	a	d			a	e	a	c	c	e	a	c	d	c			a	c	g		c	a	a	a	a	c	b	c	d	b	d	5	4	2	4	5
		3	a	g	a	a	a	a	a	a	b	a	a	a	d			a	e	a	a	a	b	a	f	f	a	a	a	c	a	e	a	d	b	a	b	b	b	b	b	d	b	d	4	4	3	3	4
		3	a	g	a	a	a	a	a	a	a	a	a	a	e	c		a	e	a	c	a	a,b,c	a	f	f	a	b,c,d	a	a	a	e	a	c	b	a	b	b	c	b	b	d	b	d	5	5	5	5	5
		3	a	d	a	a	a	a	a	a	a	g	a	a	e	b		a	b	c	c	c	b	b	a	a	c			c	a	e	b	d	a	a	c	c	c	b	c	d	b	c	4	3	3	4	4
		3	b	a	a	a	a	a	a	a	b	a	a	a	e	b		a	a	c	c	c	b	b	a	a	a	a,b	c	c	b	g		c	a	b	a	a	b	b	c	d	b	d	5	5	3	4	5
		3	b	a	a	a	a	a	a	a	b	a	a	a	e	a	10	a	e	a	a	a	a,b	a	e	e	c			a	a	e	a	a	a	a	a	a	b	b	c	d	a	d	5	5	5	5	5
		3	b	a	a	a	a	a	a	a	b	a	a	a	e	a	3	a	e	a	a	a	a,b	a	e	e	c			a	a	e	a	a	a	a	a	a	b	b	c	d	a	d	4	5	4	5	4
		3	b	a	a	a	a	a	a	a	b	a	a	a	e	a	3	a	e	a	a	a	a,b	a	e	e	c			c	a	e	a	a	a	a	a	a	b	b	c	d	a	d	4	4	5	5	5
		3	a	e	g	f	b	g	e	e	a	c	e	f	e	c		b		a	a	b	e	a	a	a	b			a	b	a		a	d	a	b	a	a	a	b	c	d	d	4	5	1	3	4
		3	a	g	g	d	b	c,e,g	e	e	b	a	b	f	e	c		b		a	a	a	a	a	b	e	a	a	a	a	a	g	a	a	d	a	c	b	c	b	c	a	c	a	1	5	2	2	2
		3	a	f	f	g	b	h	e	c	a	a	e	d	e	b		c		a	b	b	b	a	a	a	b			b	b	f		b	a	a	d	d	a	b	c	d	b	d	5	5	5	5	5
		3	b	a	a	a	a	a	a	a	b	a	a	a	e	a		a	e	a	a	a	a,b	a	e	e	c			a	c	e	a	a	a	a	a	a	b	b	c	d	b	d	5	4	4	5	5
		3	b	a	a	a	a	a	a	a	b	a	a	a	e	a	4	a	e	a	a	a	a	a	b	f	a	b	c	a	a	f	a	b	a	a	a	a	c	b	a	d	b	d	4	4	4	3	4
		3	a	b	a	a	a	a	a	a	a	a	a	a	c			a	d	a	a	a	a	a	a	a	b			a	a	e	a	a	a	a	a	b	b	b	c	d	b	d	1	2	1	4	5
		3	a	g	a	a	a	a	a	a	b	a	a	a	e	b		a	c	a	a	a	b	a	a	a	b			a	c	e	b	b	a	a	a	b	b	b	b	d	c	d	5	5	4	5	5
		1	b	a	a	a	a	a	a	a	b	a	a	a	e	a	3	a	e	a	a	a	a,b	a	e	e	c			a	a	e	a	a	a	a	a	a	b	b	c	d	a	d	5	5	5	5	5
		1	b	a	a	a	a	a	a	a	b	a	a	a	e	a		a	e	a	a	a	a,b	a	e	e	c			c	c	e	a	a	a	a	a	a	b	b	c	d	b	d	5	5	4	4	5
		1	a	e	g	e	b	c	e	e	a	a	b	f	e	b	10	b		a	a	a	b	a	a	a	a	b,c	c	a	a	g	a	b	c	a	d	d	c	b	c	d	c	d	5	4	3	5	5
		1	b	a	a	a	a	a	a	a	b	a	a	a	e	a		a	e	a	a	a	b	a	f	f	a	a,b,c,d	a	c	c	e	a	a	a	a	a	a	c	b	b	d	a	d	5	5	3	5	5
		1	b	a	a	a	a	a	a	a	b	a	a	a	e	c		a	e	a	a	a	b	a	b	f	a	a,b,c,d	a	a	c	g		a	b	a	c	d	c	b	c	d	a	d	5	4	5	5	5
		1	a	g	a	a	a	a	a	a	b	a	a	a	e	b		a	b	a	a	a	b	a	a	a	b			a	b	e	b	a	a	a	b	b	b	b	b	d	b	d	5	5	5	5	5
		1	a	e	a	a	a	a	a	a	a	a	a	a	e	b	5	a	e	c	c	c	e	b	f	a	a	a,c,d	a	a	c	d	a	a	a	b	a	b	b	b	b	d	b	d	4	4	5	3	4
		1	a	g	a	a	a	a	a	a	b	a	a	a	e	c	5	a	e	a	a	a	b	a	f	a	a	a,c,d	a	a	c	e	a	a	a	a	b	b	b	b	b	d	b	d	5	4	5	3	5
		1	b	a	a	a	a	a	a	a	a	a	a	a	e	b	d	a	d	a	a	a	a	a	e	f	a	a,c,d	a	c	c	e	a	d	b	a	b	c	c	b	b	d	b	d	5	5	3	3	5
		1	a	f	a	a	a	a	a	a	a	c	a	a	g			a	a	c	c	c	b	a	e	f	a	b	a	c	a	e	b	a	b	b	a	a	c	c	b	d	b	c	5	3	3	3	5
		1	b	a	a	a	a	a	a	a	b	a	a	a	g			a	e	c	c	c	e	a	d	f	a	b	a	a	a	e	b	a	b	a	a	a	b	b	b	d	b	c	1	3	2	3	2
		1	a	g	a	a	a	a	a	a	b	a	a	a	g			a	e	c	c	c	e	c	e	f	c			c	c	g		c	d	b	d	d	a	a	c	d	b	d	3	3	3	3	3
		1	b	a	a	a	a	a	a	a	b	a	a	a	e	a	10	a	e	a	a	a	a,b	a	f	f	c			a	c	e	a	a	a	a	a	a	a	b	c	d	a	d	5	5	5	5	5
		1	a	f	a	a	a	a	a	a	a	a	a	a	g			a	e	a	a	a	b	a	f	f	a	a,b,c,d	a	a	a	e	a	c	b	a	b	b	c	c	b	d	a	c	5	5	3	5	5
		1	a	f	b	b	b	b	b	d	a	d	e	e	e	c	5	a	b	a	a	a	a,b,c	a	b	b	a	a,b,c,d	c	c	c	e	a	a	c	a	c	d	c	b	a	c	b	c	4	4	4	4	4
		1	a	e	g	c	d	c	g	d	a	a	e	f	e	b	5	b		a	a	a	a	a	e	e	a	a,b,c,d	a	a	a	e	a	a	b	a	c	d	c	b	a	c	b	c	4	4	4	4	4
		1	a	e	a	a	a	a	a	a	b	a	a	a	e	a	5	a	e	a	a	a	a,b	a	e	e	a	a,b,c,d	a	a	a	e	a	a	a	a	b	c	c	b	b	d	a	d	5	5	3	5	5
		1	b	a	a	a	a	a	a	a	b	a	a	a	e	c	9	a	e	a	a	a	a	a	f	f	a	d	a	a	a	e	a	a	a	a	a	a	b	b	b	c	a	d	5	5	5	5	5
		1	b	a	a	a	a	a	a	a	b	a	a	a	e	b		a	e	a	a	a	a	a	a	a	a	c	a	c	c	g	a	c	a	a	a	a	b	b	c	d	b	c	5	4	4	5	5
		1	b	a	a	a	a	a	a	a	a	a	a	a	e	b	5	a	e	c	c	c	e	c	b	a	c			c	c	g		b	a	a	b	b	b	b	b	d	b	d	5	5	4	4	5
		1	b	a	a	a	a	a	a	a	b	a	a	a	e	b	5	a	a	a	c	a	e	a	a	a	a	a,c,d	b	a	c	e	a	a	a	a	a	b	c	c	b	d	b	d	5	5	5	5	5
		1	b	a	a	a	a	a	a	a	a	c	a	a	c			a	c	a	a	a	a	c	f	b	c			c	c	e	a	a	b	a	b	b	c	c	b	a	b	c	1	2	3	4	1
		1	b	a	a	a	a	a	a	a	b	a	a	a	e	b	5	a	e	c	c	c	a	a	f	b	c			a	c	g		c	a	a	a	a	c	c	b	d	b	d	5	5	4	4	4
		1	a	f	a	a	a	a	a	a	a	a	a	a	e	b	5	a	e	a	c	c	b	a	f	f	c			c	c	g		b	a	a	a	a	b	b	b	d	b	d	5	5	3	4	4
		1	b	a	a	a	a	a	a	a	a	a	a	a	e	c	5	a	e	a	c	a	a	b	e	f	a	a,c,d	c	c	c	c	a	a	a	a	a	b	b	b	b	d	b	d	5	5	5	4	5
		1	b	a	a	a	a	a	a	a	b	a	a	a	e	a	5	a	e	a	a	a	a	a	f	f	a	b	a	c	c	e	a	a	a	a	a	a	b	b	c	d	b	c	4	5	4	5	4
		1	a	g	a	a	a	a	a	a	a	a	a	a	e	b	5	a	e	a	a	a	a	c	f	a	c			c	a	e	a	c	c	a	c	c	b	b	b	d	b	b	5	5	5	5	4
		1	b	a	a	a	a	a	a	a	b	a	a	a	c			a	e	a	a	a	a	a	e	f	a	a,b,c,d	a	a	a	e	a	a	a	a	a	a	b	b	a	d	a	d	5	4	5	5	5
		1	a	f	a	a	a	a	a	a	a	a	a	a	e	a	5	a	e	a	a	a	a,b	a	f	f	a	a,b,d	a	a	c	e	a	b	b	a	c	c	b	b	c	d	b	c	5	5	4	5	5
		1	b	a	a	a	a	a	a	a	b	a	a	a	e	c	5	a	e	a	a	b	a	a	a	a	a	a	a	c	c	e	a	b	a	a	a	a	b	b	c	d	a	d	5	4	3	4	5
		1	a	d	g	e	g	b	c	b	a	c	f	d	e	b		b		c	c	c	e	a	e	a	a	a,c	c	c	b	g		c	c	a	d	d	c	c	b	d	b	d	4	4	4	4	4
		1	a	f	g	e	c	c	e	c	a	c	f	b,d	e	a		c		a	a	a	b	a	f	b	a	a	a	a	a	e	a	d	c	a	c	c	b	b	b	d	c	d	5	4	4	4	4
		1	a	e	g	e	b	c	e	e	a	a	b	f	e	b	10	b		a	a	a	b	a	a	a	a	b,c	c	a	a	g	a	b	c	a	d	d	c	b	c	d	c	d	5	4	3	5	5
		2	a	d	a	a	a	a	a	a	b	a	a	a	e	a	5	a	e	a	a	a	a,b	a	e	e	a	a,b,c,d	a	a	a	e	a	c	a	a	a	a	b	b	a	d	a	d	5	5	5	5	5
		2	a	f	a	a	a	a	a	a	a	a	a	a	e	a	5	a	e	a	c	a	a,b	a	f	f	a	a,b,c,d	a	c	c	g		a	b	a	c	c	b	b	c	d	a	d	5	4	3	5	4
		2	b	a	a	a	a	a	a	a	b	a	a	a	e	b	c	a	d	a	a	a	b	a	b	a	a	d	b	c	c	g		a	a	a	a	a	b	b	b	d	a	c	4	4	4	4	5
		2	b	a	a	a	a	a	a	a	b	a	a	a	e	b	c	a	d	a	a	a	b	a	b	a	a	d	b	c	c	g		a	a	a	a	a	b	b	a	d	a	c	5	4	5	5	5
		2	a	g	a	a	a	a	a	a	b	a	a	a	e	a	5	a	e	a	a	a	a,b	a	d	e	a	a,b,c,d	a	a	c	e	a	a	a	a	b	b	b	b	b	d	b	d	5	4	4	4	5
		2	a	g	a	a	a	a	a	a	b	a	a	a	e	a		a	e	a	a	a	b	a	e	a	a	a,d	c	a	c	e	a	d	b	a	c	c	c	c	b	c	b	b	4	3	3	5	5
		2	a	g	a	a	a	a	a	a	b	a	a	a	g			a	e	b	b	b	d	b	a	d	b			b	b	g	b	a	a	a	a	a	c	c	b	d	d	d	5	5	5	5	5
		2	b	a	a	a	a	a	a	a	b	a	a	a	e	b		a	e	c	a	a	b	a	b	a	a	a,d	c	c	c	g	a	a	a	a	a	a	b	b	a	d	b	d	5	5	3	5	5
		2	b	a	a	a	a	a	a	a	b	a	a	a	c			a	e	c	c	a	b	a	d	a	b			c	c	c	a	d	a	b	a	a	b	b	b	d	b	d	5	4	4	4	5
		2	a	g	g	g	b	c	e	e	a	a	e	d	e	b		b		a	a	a	b	a	b	a	a	c	c	a	c	e	a	b	c	b	c	c	c	c	c	c	c	b	4	4	4	5	4
		2	a	e	g	e	b	c	e	e	a	a	d	d	e	b	18	b		a	a	c	b	a	b	a	a	e	c	a	c	e	a	c	d	b	d	d	c	c	b	b	d	a	3	3	5	3	3
		2	a	g	a	a	a	a	a	a	b	a	a	a	e	a		a	e	a	a	a	b	a	b	d	a	b	c	c	c	e	b	a	b	b	c	c	b	b	a	d	b	d	5	5	4	5	5
		2	a	g	a	a	a	a	a	a	b	a	a	a	e	b		a	e	a	a	a	b	a	a	a	a	c	a	c	c	e	a	a	a	a	b	c	b	b	b	d	b	d	5	5	5	5	5
		2	b	a	a	a	a	a	a	a	b	a	a	a	e	a		a	e	a	a	a	a,b	a	e	e	a	a,c	a	c	c	e	a	a	a	a	a	a	b	b	c	d	b	d	5	4	5	5	5
		2	a	g	a	a	a	a	a	a	b	a	a	a	e	b		a	d	a	a	a	e	a	b	a	c			b	c	e	b	a	b	b	b	b	c	b	c	d	b	d	4	4	3	4	5
		2	b	a	a	a	a	a	a	a	b	a	a	a	e	b		a	e	a	a	a	a	a	a	a	a	b,c,d	a	c	c	g	a	a	a	a	a	a	c	b	c	d	a	d	5	4	3	4	5
		2	a	g	a	a	a	a	a	a	b	a	a	a	e	b		a	d	a	a	a	a	a	a	a	a	b,c,d	a	c	c	g	a	a	a	a	a	b	b	b	c	d	a	d	5	4	3	4	5
		2	b	a	a	a	a	a	a	a	b	a	a	a	e	c	90	a	e	c	c	c	b	a	a	f	a	a,b,d	a	a	a	g	a	a	a	a	a	b	b	b	b	d	b	d	5	4	4	4	5
		2	b	a	a	a	a	a	a	a	b	a	a	a	e	c	90	a	e	a	a	a	b	a	a	f	a	a,b	a	b	c	e	a	c	a	a	a	a	b	b	b	d	a	d	5	5	4	5	5
		2	a	e	g	d	b	b	e	d	b	a	f	b	e	b	3	b		c	c	c	b	a	f	a	a	a	a	b	c	e	a	d	a	a	a	a	b	b	b	d	b	c	5	4	2	3	5
		2	b	a	a	a	a	a	a	a	b	a	a	a	e	b		a	a	c	c	c	b	b	a	a	a	a,b	c	b	b	g		c	a	b	a	a	b	b	c	d	b	d	5	5	3	4	5
		2	b	a	a	a	a	a	a	a	b	a	a	a	e	a	10	a	e	a	a	a	a,b	a	e	e	c			b	a	e	a	a	a	a	a	a	b	b	c	d	a	d	5	5	5	5	5
		2	b	a	a	a	a	a	a	a	b	a	a	a	e	a	20	a	e	a	a	a	a,b	a	e	e	c			a	a	e	a	a	a	a	a	a	b	b	c	d	a	d	4	5	4	5	4
		2	b	a	a	a	a	a	a	a	b	a	a	a	e	a	20	a	e	a	a	a	a,b	a	e	e	c			a	a	e	a	a	a	a	a	a	b	b	c	d	a	d	4	4	5	5	5
		2	a	e	g	f	b	g	e	e	a	c	e	f	e	c		b		a	a	b	e	a	a	a	b			a	b	a		a	d	a	b	a	a	a	b	c	d	d	4	5	1	3	4
		2	a	g	g	d	b	c,e,g	e	e	b	a	b	f	e	c		b		a	a	a	a	a	b	e	a	a	a	a	a	g	a	a	d	a	c	b	c	b	c	a	c	a	1	5	2	2	2
		2	a	f	g	g	b	h	e	c	a	a	e	d	e	b		c		a	b	b	b	a	a	a	b			b	b	f		b	a	a	d	d	a	b	c	d	b	d	5	5	5	5	5
		2	b	a	a	a	a	a	a	a	b	a	a	a	e	a		a	e	a	a	a	a,b	a	e	e	c			b	c	e	a	a	a	a	a	a	b	b	c	d	b	d	5	4	4	5	5
		2	b	a	a	a	a	a	a	a	b	a	a	a	e	a	4	a	e	a	a	a	a	a	b	f	a	b	c	a	a	f	a	b	a	a	a	a	c	b	a	d	b	d	4	4	4	3	4
		2	a	b	a	a	a	a	a	a	a	a	a	a	c			a	d	a	a	a	a	a	a	a	b			a	a	e	a	a	a	a	a	b	b	b	c	d	b	d	1	2	1	4	5
		2	a	g	a	a	a	a	a	a	b	a	a	a	e	b		a	c	a	a	a	b	a	a	a	b			a	c	e	b	b	a	a	a	b	b	b	b	d	c	d	5	5	4	5	5
		2	b	a	a	a	a	a	a	a	b	a	a	a	e	a	20	a	e	a	a	a	a,b	a	e	e	c			a	a	e	a	a	a	a	a	a	b	b	c	d	a	d	5	5	5	5	5
		2	b	a	a	a	a	a	a	a	b	a	a	a	e	a		a	e	a	a	a	a,b	a	e	e	c			a	c	e	a	a	a	a	a	a	b	b	c	d	b	d	5	5	4	4	5
		2	a	e	g	e	b	c	e	e	a	a	b	f	e	b	10	b		a	a	a	b	a	a	a	a	b,c	c	a	a	g	a	b	c	a	d	d	c	b	c	d	c	d	5	4	3	5	5
		2	b	a	a	a	a	a	a	a	b	a	a	a	e	a		a	e	a	a	a	b	a	f	f	a	a,b,c,d	a	c	c	e	a	a	a	a	a	a	c	b	b	d	a	d	5	5	3	5	5
		2	b	a	a	a	a	a	a	a	b	a	a	a	e	c		a	e	a	a	a	b	a	b	f	a	a,b,c,d	a	b	c	g		a	b	a	c	d	c	b	c	d	a	d	5	4	5	5	5
		2	a	g	a	a	a	a	a	a	b	a	a	a	e	b		a	b	a	a	a	b	a	a	a	b			a	b	e	b	a	a	a	b	b	b	b	b	d	b	d	5	5	5	5	5
		2	a	e	a	a	a	a	a	a	a	a	a	a	e	b	5	a	e	c	c	c	e	b	f	a	a	a,c,d	a	a	c	d	a	a	a	b	a	b	b	b	b	d	b	d	4	4	5	3	4
		2	a	g	a	a	a	a	a	a	b	a	a	a	e	c	5	a	e	a	a	a	b	a	f	a	a	a,c,d	a	a	c	e	a	a	a	a	b	b	b	b	b	d	b	d	5	4	5	3	5
		2	b	a	a	a	a	a	a	a	a	a	a	a	e	b	d	a	d	a	a	a	a	a	e	f	a	a,c,d	a	a	c	e	a	d	b	a	b	c	c	b	b	d	b	d	5	5	3	3	5
		1	a	f	a	a	a	a	a	a	a	d	a	a	e	b		a	a	a	c	a	e	c	a	a	c			b	c	c	a	a	c	b	c	d	c	b	b	d	c	d	5	4	4	4	5
		4	a	f	a	a	a	a	a	a	b	a	a	a	d			a	b	a	a	a	b	a	b	b	b			a	b	g	a	a	a	a	a	a	b	b	b	d	b	c	5	5	1	5	5
		4	b	a	a	a	a	a	a	a	b	a	a	a	e	c	20	a	b	c	c	c	e	c	b	a	a	a,b	c	c	c	e	a	d	a	b	a	a	b	b	c	d	a	d	5	4	4	4	4
		4	a	f	a	a	a	a	a	a	a	a	a	a	e	b		a	a	b	b	b	e	a	a	a	a	c	c	a	a	g	a	b	b	b	c	c	c	c	c	d	d	c	5	5	3	5	5
		4	a	d	a	a	a	a	a	a	a	a	a	a	e	b		a	a	a	a	a	b	b	a	a	a	a,b,e1	c	b	a	c	a	d	b	a	c	c	b	b	c	d	c	d	4	4	3	2	5
		4	a	d	a	a	a	a	a	a	a	a	a	a	e	b		a	a	a	c	a	b	b	a	a	a	a,b,e1	c	b	a	e	a	a	b	a	c	c	b	b	c	d	b	c	5	4	3	2	4
		4	b	a	a	a	a	a	a	a	a	a	a	a	e	b		a	b	a	a	a	e	a	b	a	a	c	c	b	c	f	a	a	a	b	a	b	b	b	b	d	c	d	4	4	3	4	4
		4	b	a	a	a	a	a	a	a	b	a	a	a	e	a		a	e	b	c	c	e	c	f	f	c			c	c	g		a	a	a	a	a	b	b	c	d	b	d	5	5	1	3	5
		4	a	g	b	b	d	e	g	d	a	c	c	d	e	b		b	e	c	c	c	e	a	f	f	a	a,b	c	b	c	e	a	a	c	a	d	d	c	c	c	d	c	c	5	2	3	5	5
		4	a	b	a	a	a	a	a	a	b	a	a	a	e	a		a	a	c	a	a	e	c	a	a	a	a,b	a	b	c	g		c	a	b	a	a	c	c	c	a	c	a	5	5	3	3	5
		4	a	f	f	d	e	b	e	e	a	c	f	d	g			b		c	c	c	b	c	a	a	a	b	c	a	b	g		d	c	a	d	d	c	b	b	c	c	d	4	4	4	4	4
		4	a	g	f	d	b	b	d	d	a	a	c	b	e	b		c		a	c	c	b	a	f	a	a	a,c	c	b	c	g		d	c	b	b	c	c	b	b	d	b	b	5	5	3	4	4
		4	a	g	g	d	b	b	e	c	a	a	b	d	e	a	0	b		a	a	c	b	a	a	a	a	b	c	c	c	g		b	c	a	d	c	c	c	c	d	c	d	4	4	3	4	4
		4	b	a	a	a	a	a	a	a	b	a	a	a	c			a	d	c	c	c	e	c	a	a	a	a,b	a	b	c	g		d	a	a	b	b	b	b	b	d	b	d	5	5	5	5	5
		4	a	f	a	a	a	a	a	a	a	a	a	a	c			a	a	a	a	a	b	b	f	a	a	a,c	c	b	b	f		b	b	a	c	c	b	b	b	d	c	d	4	5	5	5	5
		4	a	c	g	b	b	e	e	d	a	a	c	b	c			d		b	b	b	b	b	a	a	c			b	b	b		b	c	b	b	c	b	b	b	a	d	d	4	4	4	4	4
		4	a	g	a	a	a	a	a	a	a	a	a	a	e	b		a	a	c	a	a	a	b	f	a	a	e1	a	c	a	e	a	c	b	a	c	c	c	c	c	d	b	c	5	4	4	3	5
		4	a	f	b	b	d	e	g	b	a	c	c	f	e	a		a	b	a	a	a	b	a	c	a	a	a,b,c,d	a	b	c	g		a	b	a	c	c	b	b	b	d	c	d	5	5	3	5	5
		4	a	f	a	a	a	a	a	a	a	a	a	a	g			a	e	a	a	a	a	a	b	a	c			c	a	c	a	a	a	a	b	b	b	c	b	d	c	d	5	4	3	3	5
		4	b	a	a	a	a	a	a	a	b	a	a	a	g			a	e	a	a	a	a	a	b	a	c			c	c	c	a	a	a	a	b	a	c	c	b	c	c	c	4	3	2	2	2
		4	a	g	g	e	b	b	e	d	a	e	d	e	e	c		b		c	c	c	a	c	f	a	a	c,d	c	a	a	g		b	c	a	d	d	c	c	b	d	c	d	4	4	3	2	5
		4	a	d	g	f	b	g	e	e	a	a	b,c,d,e,f	b,d	e	b		c		b	b	b	b	a	f	e	a	a,b	c	b	a	b	c	c	a	a	d	a	b	a	a	a	a	a	1	2	1	3	1
		4	a	g	e	d	b	b	c	d	a	a	c	b	d			c		b	a	b	b	b	c	c	b			a	b	f	a	d	c	a	c	b	c	a	b	c	b	b	5	3	3	4	5
		3	b	a	a	a	a	a	a	a	b	a	a	a	e	c	20	a	b	c	c	a	b	c	b	a	a	a	c	c	a	e	a	c	a	b	a	a	b	b	b	d	b	a	5	5	3	4	5
		3	a	g	b	f	b	e	e	d	b	a	b	f	d			b	e	c	c	c	e	a	a	f	c			c	c	g	d	a	b	b	d	a	c	b	a	c	d	b	1	2	3	4	5
		3	a	g	a	a	a	a	a	a	b	a	a	a	e	b	7	a	a	a	a	a	b	a	a	a	a	c	a	b	b	e	b	a	b	a	c	d	c	c	c	d	c	d	5	5	4	4	5
		3	a	c	d	c	b	b	e	e	a	c	f	d	e	b		b		a	a	a	b	a	f	a	a	b	a	c	a	e	a	a	c	a	c	b	c	c	b	d	c	c	5	4	3	5	5
		3	a	g	b	b	f	f	d	b	b	g	c	c	g			b	b	a	c	a	e	b	a	f	a	c	c	b	c	a	d	a	d	a	c	b	b	b	c	a	d	d	4	3	1	4	3
		3	a	d	a	a	a	a	a	a	b	a	a	a	e	b		a	b	a	a	a	b	b	a	a	a	a	c	c	b	g		b	a	b	a	a	b	b	b	d	a	c	5	4	3	5	5
		3	a	d	a	a	a	a	a	a	b	a	a	a	e	b		a	b	a	a	a	b	b	a	a	a	a	c	c	b	g		d	a	a	a	b	b	b	b	d	a	d	5	4	3	4	5
		3	a	f	e	b	b	c	c	e	a	a	e	d	d			b		a	c	a	b	a	b	a	a	b	a	a	b	e	a	a	d	a	d	d	c	c	c	d	b	c	5	5	3	5	5
		3	a	e	b	b	b	c	e	d	a	f	f	f	e	b		a	a	c	a	a	b	a	a	a	b			c	a	e	a	b	c	a	c	c	b	c	c	c	b	b	4	4	3	3	2
		3	a	f	b	b	b	c	e	d	a	a	f	f	e	b	17	a	a	b	a	a	b	b	a	a	b			b	a	e	a	d	c	b	d	d	b	b	b	d	b	d	5	4	2	4	5
		3	a	f	a	a	a	a	a	a	b	a	a	a	e	b	10	a	b	c	c	c	e	c	f	a	a	b	a	c	c	g		a	a	a	a	a	c	c	c	d	b	c	5	4	3	4	4
		3	b	a	a	a	a	a	a	a	b	a	a	a	g			a	e	b	b	b	a	b	e	e	b			b	a	g	a	b	a	a	a	a	b	b	c	d	c	d	5	5	4	3	3
		3	a	d	a	a	a	a	a	a	b	a	a	a	f			a	e	a	a	a	a	a	a	a	a	a,b,c,d	a	a	c	f	d	b	b	b	c	c	b	a	c	d	d	d	1	1	1	1	1
		3	b	a	a	a	a	a	a	a	b	a	a	a	c			a	e	c	c	c	b	c	f	a	a	a	b	a	b	c	b	a	a	a	a	a	b	b	b	d	b	b	5	2	2	4	4
		3	b	a	a	a	a	a	a	a	b	a	a	a	c			a	e	c	c	c	b	c	f	a	a	a	b	a	b	c	b	a	a	a	a	a	b	b	b	d	b	b	5	2	2	4	4
		3	a	g	a	a	a	a	a	a	b	a	a	a	e	b		a	a	c	c	c	e	a	f	a	a	a	b	b	c	g		a	a	a	a	a	c	c	c	d	c	d	5	5	5	5	5
		3	a	e	a	a	a	a	a	a	a	g	a	a	a			a	a	a	a	a	a	a	a	a	a	a	a	a	a	c	a	b	a	a	b	b	b	b	b	d	c	b	5	5	5	5	5
		3	a	b	g	f	b	e	e	d	a	a	c	b	g			d		b	b	b	b	b	b	b	b			b	b	b	b	b	b	b	b	b	a	a	a	d	a	a	1	1	1	1	1
		3	a	f	a	a	a	a	a	a	a	a	a	a	e	b	d	a	a	c	a	a	b	b	f	a	a	a,e1	c	b	a	e	a	b	a	a	b	b	b	b	b	d	c	c	5	4	5	5	5
		3	a	f	a	a	a	a	a	a	a	a	a	a	e	b		a	a	c	a	a	b	b	b	a	a	a	b	a	a	e	a	a	c	a	d	d	c	c	c	d	c	d	5	5	5	5	5
		3	a	f	a	a	a	a	a	a	a	a	a	a	d			a	a	c	c	c	b	b	f	e	b			b	a	a	b	b	a	b	b	a	a	a	b	d	d	c	1	2	1	1	3
		3	b	a	a	a	a	a	a	a	b	a	a	a	c			a	e	b	c	c	e	c	e	f	c			a	a	e	b	c	a	a	a	a	b	b	b	c	c	c	5	4	4	4	5
		3	a	f	g	e	c	c	e	c	a	c	f	b,d	e	a		c		b	a	a	b	a	f	b	a	a	a	a	a	e	a	d	c	a	c	c	b	b	b	d	c	d	5	4	4	4	4
		3	a	b	g	f	b	e	e	d	a	a	c	b	e	b		b		c	c	c	b	a	f	a	a	a,b,c,d	a	c	c	g		c	a	a	a	a	c	b	b	d	b	d	5	5	3	4	5
		3	a	f	g	e	c	c	e	c	a	c	f	d,e	e	a		b		a	a	a	a,b	b	b	a	a	b	a	c	a	e	a	a	c	a	d	d	b	b	b	d	c	d	5	5	4	4	5
		3	a	g	g	b	d	b	g	d	b	a	c	c	g			b		c	c	c	b	b	f	a	a	e3	c	a	a	e	a	d	b	a	a	a	b	b	b	d	b	d	5	4	5	5	5
		3	a	g	g	f	b	b	b	e	a	c	c	d	e	b	5	c		a	a	a	b	a	b	a	a	c	b	b	a	b	a	c	c	b	b	c	b	b	c	d	d	d	5	5	5	5	5
		3	b	a	a	a	a	a	a	a	b	a	a	a	e	b		a	c	a	a	a	a	a	f	a	a	b	a	c	c	g		a	a	b	a	a	c	b	c	d	c	d	5	4	4	3	5
		3	a	g	a	a	a	a	a	a	b	a	a	a	e	b		a	a	c	c	c	e	c	f	f	a	b,d	c	c	b	e	b	c	c	a	c	c	c	c	b	d	b	d	4	3	3	4	4
		3	a	f	g	d	b	e	e	d	a	a	b	d	e	b		c		a	a	a	b	a	a	a	a	a,c	c	a	c	c	b	a	c	a	c	b	c	c	b	a	c	c	4	3	3	5	5
		3	a	f	g	e	e	e	e	d	a	a	c	b	e	b	10	c		c	c	c	b	a	a	a	a	a,b,c,d	c	b	c	g		a	c	a	c	c	c	c	b	d	c	c	4	4	3	4	4
		3	b	a	a	a	a	a	a	a	b	a	a	a	g			a	e	a	a	a	b	b	b	a	a	b	a	a	a	e	a	a	a	a	c	c	b	b	b	d	b	d	5	5	2	1	5
		3	b	a	a	a	a	a	a	a	b	a	a	a	g			a	e	c	c	c	e	c	f	f	c			c	c	g		a	a	a	b	a	c	c	c	d	d	a	4	4	4	3	4
		3	a	f	a	a	a	a	a	a	a	a	a	a	d			a	a	b	a	a	b	b	a	a	a	a	b	a	a	a	a	a	a	b	a	a	a	a	b	b	a	a	4	4	4	4	4
		3	a	d	a	a	a	a	a	a	b	a	a	a	g			a	a	c	c	c	e	c	f	f	c			c	a	c	a	c	a	b	b	b	c	b	b	d	b	c	4	4	3	3	5
		3	a	g	e	e	d	g	e	e	a	c	e	b	c			c		c	c	c	e	c	f	a	a	a	c	c	c	c	a	a	c	a	d	c	c	b	c	d	c	d	2	3	2	4	2
		3	a	g	a	a	a	a	a	a	b	a	a	a	e	b	4	a	a	c	c	c	a	a	b	a	a	b	b	a	b	d	a	a	c	a	c	c	c	c	b	d	c	c	5	4	2	5	5
		3	b	a	a	a	a	a	a	a	b	a	a	a	g			a	e	c	c	c	e	c	f	f	c			c	c	g		a	a	a	a	a	b	b	c	d	a	d	5	5	5	2	5
		3	a	d	f	e	b	b	e	e	a	a	g1	f	e	a	10	b		a	a	a	b	a	f	d	a	a,b,c,d	a	c	c	e	a	b	d	a	d	d	a	b	a	b	c	b	3	3	1	4	5
		3	a	f	f	e	b	e	e	d	a	a	g1	f	e	a	10	b		a	a	a	b	a	f	d	a	a,b,c,d	a	c	a	e	a	a	c	a	d	c	a	b	c	c	c	b	3	2	3	3	2
		3	b	a	a	a	a	a	a	a	b	a	a	a	e	b	10	a	e	a	a	a	b	b	a	a	b			b	b	e	d	a	a	a	a	a	b	b	c	d	c	d	5	2	2	5	5
		3	b	a	a	a	a	a	a	a	b	a	a	a	c			a	d	c	c	c	e	c	f	f	c			c	c	g		c	a	a	a	a	c	b	b	a	c	c	5	4	3	5	5
		3	b	a	a	a	a	a	a	a	b	a	a	a	g			a	b	a	a	a	e	a	f	f	a	d	a	a	a	e	a	a	a	a	a	a	b	b	b	d	b	d	5	5	4	5	5
		3	a	g	b	b	b	g	e	e	b	a	f	f	a			a	e	c	c	b	c	c	a	a	b			a	a	d	b	c	b	b	a	c	b	a	c	d	a	a	4	4	3	3	2
		3	a	b	a	a	a	a	a	a	a	a	a	a	f			a	a	c	c	c	e	c	f	a	c			c	b	g		a	a	a	a	b	b	b	c	d	b	d	5	5	4	3	5
		3	a	g	g	d	b	c	c	b	a	g	e	d	e	c	10	b		c	c	c	e	a	a	a	a	d	c	c	c	e	b	d	c	a	d	c	a	b	c	d	d	d	4	4	2	4	5
		3	a	g	e	d	b	c	b	b	a	a	c	d	g			b		a	a	a	b	a	f	f	c			a	c	g	a	a	c	a	b	c	c	c	c	c	c	c	4	4	4	3	4
		3	a	b	g	d	b	c	b	b	a	c	c	b	d			b		a	a	a	a	a	f	b	a	a	a	a	b	g	a	a	c	a	d	c	c	b	b	c	c	d	5	5	5	5	5
		3	a	g	c	c	b	c	b	b	a	c	e	f	c			b		c	a	a	b	c	f	f	a	b,d	a	c	a	g		c	c	a	c	c	c	b	b	d	b	c	4	3	3	4	4
		3	b	a	a	a	a	a	a	a	a	a	a	a	e	b		a	a	c	a	a	b	b	f	a	a	a,c	c	b	c	e	a	d	a	a	a	a	c	b	a	d	c	c	5	5	4	4	1
		3	a	f	g	d	b	e	e	c	a	g	c	d	e	b		b		b	b	b	d	b	f	a	a	a	b	b	a	e	b	a	d	a	d	d	a	a	b	c	d	c	4	4	4	4	4
		3	a	e	e	d	b	h13	e	e	a	f	f	d	d			b		c	c	c	d	a	c	a	a	a,b	c	a	b	g		d	c	a	d	b	b	b	b	d	c	d	5	4	3	2	5
		3	a	f	a	a	a	a	a	a	a	d	a	a	e	b		a	a	a	c	a	e	c	a	a	c			b	c	c	a	a	c	b	c	d	c	b	b	d	c	d	5	4	4	4	5
		3	a	c	b	b	d	c	b	e	b	a	d	f	e	c		b	d	c	a	a	b	c	f	f	c			a	c	g		b	b	a	c	c	c	c	c	d	b	c	1	1	1	1	1
		3	a	c	e	d	d	h13	e	e	a	g	b	e	g			b		c	c	c	e	c	e	f	c			c	c	g		c	c	a	c	c	c	b	c	c	c	a	3	3	2	3	4
		3	b	a	a	a	a	a	a	a	b	a	a	a	g			a	b	b	b	b	d	a	f	b	b			a	b	g		a	a	a	a	a	b	b	c	d	b	c	5	5	5	5	5
		3	a	d	a	a	a	a	a	a	a	a	a	a	e	b		a	e	b	b	c	e	c	f	f	a	a,b	a	c	c	g		a	a	b	a	a	b	b	b	d	c	c	5	3	3	4	5
		3	a	e	f	e	c	e	e	d	a	a	e	f	g			b		c	c	c	e	a	f	f	c			c	c	g		a	c	a	c	c	b	c	b	c	b	c	3	3	4	4	3
		2	b	a	a	a	a	a	a	a	b	a	a	a	e	b		a	a	c	c	c	b	a	f	a	c			c	c	g		d	a	b	a	b	b	b	c	d	b	d	5	4	3	4	5
		2	a	f	a	a	a	a	a	a	b	a	a	a	e	b	18	a	e	c	c	c	e	b	e	a	c			c	c	g		d	a	a	c	c	c	c	c	d	c	c	4	3	5	5	5
		2	a	f	a	a	a	a	a	a	b	a	a	a	e	b		a	e	a	a	a	a,b	c	f	f	c			c	c	e	a	c	a	a	a	a	c	c	c	d	c	d	5	5	4	5	5
		2	b	a	a	a	a	a	a	a	b	a	a	a	d			a	a	c	c	c	d	a	a	a	c			b	b	d	a	b	a	b	a	a	b	b	c	d	b	d	5	4	5	5	5
		2	b	a	a	a	a	a	a	a	b	a	a	a	e	b		a	a	c	c	c	e	b	a	a	b			c	c	e	a	a	a	a	a	a	b	b	b	d	a	d	5	4	5	5	5
		2	b	a	a	a	a	a	a	a	b	a	a	a	b			a	a	a	a	a	b	b	b	a	b			b	b	e	a	a	a	b	a	a	b	b	b	d	b	d	5	3	4	4	4
		2	a	f	a	a	a	a	a	a	a	a	a	a	e	b		a	d	c	c	c	e	c	f	a	a	a,b	a	c	c	e	a	a	b	a	d	b	b	b	c	d	c	c	4	4	3	5	4
		2	a	f	g	d	b	b	d	d	a	a	d	d	e	b		b		c	c	c	e	b	e	a	a	b	c	b	c	e	a	c	d	b	d	c	c	c	b	c	c	c	4	5	3	4	5
		2	b	a	a	a	a	a	a	a	a	a	a	a	d			a	a	b	b	a	c	b	a	a	a	a,b,d	b	b	c	g		d	a	a	a	a	b	b	c	d	d	d	5	5	4	5	5
		2	a	b	a	a	a	a	a	a	b	a	a	a	e	c		a	a	a	c	c	e	c	f	f	a	a,b,d	a	c	c	e	b	a	b	a	b	b	c	b	b	d	c	c	5	5	3	4	5
		2	a	g	g	d	b	e	e	e	a	c	b	g3	e	b		b		c	c	c	e	b	e	a	c			b	c	g		c	c	a	d	d	c	c	c	d	c	c	4	4	3	1	4
		2	a	g	g	e	b	e	e	d	a	a	b	g3	e	b		b		c	c	c	e	b	e	a	c			b	c	g		d	c	a	d	d	c	c	c	c	c	d	5	4	3	4	5
		2	a	g	b	b	b	b	b	b	b	a	c	c	f			b	b	c	c	c	d	a	e	a	a	b	c	b	b	e	a	a	c	b	c	c	c	c	b	d	c	c	4	4	2	4	4
		2	a	d	g	e	g	b	c	b	a	c	f	d	e	b		b		c	c	c	e	a	e	a	a	a,c	c	c	b	g		c	c	a	d	d	c	c	b	d	b	d	4	4	4	4	4
		2	a	g	a	a	a	a	a	a	b	a	a	a	g			a	a	c	c	c	e	c	a	e	a	a	b	b	b	g		d	a	b	a	c	c	b	c	a	a	a	2	2	2	2	2
		2	a	b	a	a	a	a	a	a	b	a	a	a	e	a		a	a	c	a	a	e	c	a	a	a	a,b	a	b	c	g		c	a	b	a	a	c	c	c	a	c	a	5	5	3	3	5
		2	a	f	f	d	e	b	e	e	a	c	f	d	g			b		c	c	c	b	c	a	a	a	b	c	a	b	g		d	c	a	d	d	c	b	b	c	c	d	4	4	4	4	4
		2	a	g	f	d	b	b	d	d	a	a	c	b	e	b		c		a	c	c	b	a	f	a	a	a,c	c	b	c	g		d	c	b	b	c	c	b	b	d	b	b	5	5	3	4	4
		2	a	g	g	d	b	b	e	c	a	a	b	d	e	a		b		a	a	c	b	a	a	a	a	b	c	c	c	g		b	c	a	d	c	c	c	c	d	c	d	4	4	3	4	4
		2	b	a	a	a	a	a	a	a	b	a	a	a	c			a	d	c	c	c	e	c	a	a	a	a,b	a	b	c	g		d	a	a	b	b	b	b	b	d	b	d	5	5	5	5	5
		2	a	f	a	a	a	a	a	a	a	a	a	a	c			a	a	a	a	a	b	b	f	a	a	a,c	c	b	b	f		b	b	a	c	c	b	b	b	d	c	d	4	5	5	5	5
		2	a	g	a	a	a	a	a	a	b	a	a	a	g			a	a	c	c	c	e	c	a	e	a	a	b	b	b	g		d	a	b	a	c	c	b	c	a	a	a	2	2	2	2	2
		2	b	a	a	a	a	a	a	a	b	a	a	a	e	c	20	a	b	c	c	a	b	c	b	a	a	a	c	c	a	e	a	c	a	b	a	a	b	b	b	d	b	a	5	5	3	4	5
		2	a	g	b	f	b	e	e	d	b	a	b	f	d			b	e	c	c	c	e	a	a	f	c			c	c	g	d	a	b	b	d	a	c	b	a	c	d	b	1	2	3	4	5
		2	a	g	a	a	a	a	a	a	b	a	a	a	e	b	7	a	a	a	a	a	b	a	a	a	a	c	a	b	b	e	b	a	b	a	c	d	c	c	c	d	c	d	5	5	4	4	5
		2	a	f	d	c	b	b	e	e	a	c	f	d	e	b		b		a	a	a	b	a	f	a	a	b	a	c	a	e	a	a	c	a	c	b	c	c	b	d	c	c	5	4	3	5	5
		2	a	g	b	b	f	f	d	b	b	g	c	c	g			b	b	a	c	b	e	b	a	f	a	c	c	b	c	a	d	a	d	a	c	b	b	b	c	a	d	d	4	3	1	4	3
		2	a	d	a	a	a	a	a	a	b	a	a	a	e	b		a	b	a	a	a	b	b	a	a	a	a	c	c	b	g		b	a	b	a	a	b	b	b	d	a	c	5	4	3	5	5
		2	a	d	a	a	a	a	a	a	b	a	a	a	e	b		a	b	a	a	a	b	b	a	a	a	a	c	c	b	g		d	a	a	a	b	b	b	b	d	a	d	5	4	3	4	5
		2	a	f	e	b	b	c	c	e	a	a	e	d	d			b		a	c	a	b	a	b	a	a	b	a	a	b	e	a	a	d	a	d	d	c	c	c	d	b	c	5	5	3	5	5
		2	a	e	b	b	b	c	e	d	a	f	f	f	e	b		a	a	c	a	a	b	a	a	a	b			c	a	e	a	b	c	a	c	c	b	c	c	c	b	b	4	4	3	3	2
		2	a	f	b	b	b	c	e	d	a	a	f	f	e	b	17	a	a	b	a	a	b	b	a	a	b			b	a	e	a	d	c	b	d	d	b	b	b	d	b	d	5	4	2	4	5
		1	a	f	a	a	a	a	a	a	b	a	a	a	e	b	10	a	b	c	c	c	e	c	f	a	a	b	a	c	c	g		a	a	a	a	a	c	c	c	d	b	c	5	4	3	4	4
		1	b	a	a	a	a	a	a	a	b	a	a	a	g			a	e	b	b	b	a	b	e	e	b			b	a	g	a	b	a	a	a	a	b	b	c	d	c	d	5	5	4	3	3
		1	a	d	a	a	a	a	a	a	b	a	a	a	f			a	e	a	a	a	a	a	a	a	a	a,b,c,d	a	a	c	f	d	b	b	b	c	c	b	a	c	d	d	d	1	1	1	1	1
		1	b	a	a	a	a	a	a	a	b	a	a	a	c			a	e	c	c	c	b	c	f	a	a	a	b	a	b	c	b	a	a	a	a	a	b	b	b	d	b	b	5	2	2	4	4
		1	b	a	a	a	a	a	a	a	b	a	a	a	c			a	e	c	c	c	b	c	f	a	a	a	b	a	b	c	b	a	a	a	a	a	b	b	b	d	b	b	5	2	2	4	4
		1	a	g	a	a	a	a	a	a	b	a	a	a	e	b		a	a	c	c	c	e	a	f	a	a	a	b	b	c	g		a	a	a	a	a	c	c	c	d	c	d	5	5	5	5	5
		1	a	g	b	b	b	b	b	b	b	a	c	c	f			b	b	c	c	c	d	a	e	a	a	b	c	b	b	e	a	a	c	b	c	c	c	c	b	d	c	c	4	4	2	4	4
		1	a	e	a	a	a	a	a	a	a	g	a	a	a			a	a	a	a	a	a	a	a	a	a	a	a	a	a	c	a	b	a	a	b	b	b	b	b	d	c	b	5	5	5	5	5
		1	a	b	g	f	b	e	e	d	a	a	c	b	g			d		b	b	b	b	b	b	b	b			b	b	b	b	b	b	b	b	b	a	a	a	d	a	a	1	1	1	1	1
		1	a	f	a	a	a	a	a	a	a	a	a	a	e	b	d	a	a	c	a	a	b	b	f	a	a	a,e1	c	b	a	e	a	b	a	a	b	b	b	b	b	d	c	c	5	4	5	5	5
		1	a	f	a	a	a	a	a	a	a	a	a	a	e	b		a	a	c	a	a	b	b	b	a	a	a	b	a	a	e	a	a	c	a	d	d	c	c	c	d	c	d	5	5	5	5	5
		1	a	f	a	a	a	a	a	a	a	a	a	a	d			a	a	c	c	c	b	b	f	e	b			b	a	a	b	b	a	b	b	a	a	a	b	d	d	c	1	2	1	1	3
		1	b	a	a	a	a	a	a	a	b	a	a	a	c			a	e	b	c	c	e	c	e	f	c			a	a	e	b	c	a	a	a	a	b	b	b	c	c	c	5	4	4	4	5
		1	a	d	g	e	g	b	c	b	a	c	f	d	e	b		b		c	c	c	e	a	e	a	a	a,c	c	c	b	g		c	c	a	d	d	c	c	b	d	b	d	4	4	4	4	4
		1	a	f	g	e	c	c	e	c	a	c	f	b,d	e	a		c		a	a	a	b	a	f	b	a	a	a	a	a	e	a	d	c	a	c	c	b	b	b	d	c	d	5	4	4	4	4
		1	a	g	a	a	a	a	a	a	a	a	a	a	e	b		a	b	c	c	c	b	a	f	a	a	a,b,c,d	a	c	c	g		c	a	a	a	a	c	b	b	d	b	d	5	5	3	4	5
		1	a	e	e	c	d	c	b	b	a	g	e	d,e	e	a		b		a	a	a	a,b	b	b	a	a	b	a	c	a	e	a	a	c	a	d	d	b	b	b	d	c	d	5	5	4	4	5
		1	a	g	a	a	a	a	a	a	b	a	a	a	g			a	e	c	c	c	b	b	f	a	a	e3	c	a	a	e	a	d	b	a	a	a	b	b	b	d	b	d	5	4	5	5	5
		1	b	a	a	a	a	a	a	a	b	a	a	a	e	b		a	a	c	c	c	b	a	f	a	c			c	c	g		d	a	b	a	b	b	b	c	d	b	d	5	4	3	4	5
		1	a	f	a	a	a	a	a	a	b	a	a	a	e	b	18	a	e	c	c	c	e	b	e	a	c			c	c	g		d	a	a	c	c	c	c	c	d	c	c	4	3	5	5	5
		1	a	c	a	a	a	a	a	a	b	a	a	a	e	b		a	e	a	a	a	a,b	c	f	f	c			c	c	e	a	c	a	a	a	a	c	c	c	d	c	d	5	5	4	5	5
		1	b	a	a	a	a	a	a	a	b	a	a	a	d			a	a	c	c	c	d	a	a	a	c			b	b	d	a	b	a	b	a	a	b	b	c	d	b	d	5	4	5	5	5
		1	b	a	a	a	a	a	a	a	b	a	a	a	e	b		a	a	c	c	c	e	b	a	a	b			c	c	e	a	a	a	a	a	a	b	b	b	d	a	d	5	4	5	5	5
		1	b	a	a	a	a	a	a	a	b	a	a	a	b			a	a	a	a	a	b	b	b	a	b			b	b	e	a	a	a	b	a	a	b	b	b	d	b	d	5	3	4	4	4
		1	a	f	a	a	a	a	a	a	a	a	a	a	e	b		a	d	c	c	c	e	c	f	a	a	a,b	a	c	c	e	a	a	b	a	d	b	b	b	c	d	c	c	4	4	3	5	4
		1	a	f	c	c	b	b	d	d	a	a	d	d	e	b		b		c	c	c	e	b	e	a	a	b	c	b	c	e	a	c	d	b	d	c	c	c	b	c	c	c	4	5	3	4	5
		1	b	a	a	a	a	a	a	a	a	a	a	a	d			a	a	b	b	a	c	b	a	a	a	a,b,d	b	b	c	g		d	a	a	a	a	b	b	c	d	d	d	5	5	4	5	5
		1	a	b	a	a	a	a	a	a	b	a	a	a	e	c		a	a	a	c	c	e	c	f	f	a	a,b,d	a	c	c	e	b	a	b	a	b	b	c	b	b	d	c	c	5	5	3	4	5
		1	a	g	c	c	b	e	e	e	a	c	b	g3	e	b		b		c	c	c	e	b	e	a	c			b	c	g		c	c	a	d	d	c	c	c	d	c	c	4	4	3	1	4
		1	a	g	c	b	b	e	e	d	a	a	b	g3	e	b		b		c	c	c	e	b	e	a	c			b	c	g		d	c	a	d	d	c	c	c	c	c	d	5	4	3	4	5
		2	a	c	g	e	b	e	e	d	a	a	c	b	c			d		b	b	b	b	b	a	a	c			b	b	b		b	c	b	b	c	b	b	b	a	d	d	4	4	4	4	4
		2	a	g	a	a	a	a	a	a	a	a	a	a	e	b		a	a	c	a	a	a	b	f	a	a	e1	a	c	a	e	a	c	b	a	c	c	c	c	c	d	b	c	5	4	4	3	5
		2	a	f	b	b	d	e	g	b	a	c	c	f	e	a		a	b	a	a	a	b	a	c	a	a	a,b,c,d	a	b	c	g		a	b	a	c	c	b	b	b	d	c	d	5	5	3	5	5
		2	a	f	a	a	a	a	a	a	a	a	a	a	g			a	e	a	a	a	a	a	b	a	c			c	a	c	a	a	a	a	b	b	b	c	b	d	c	d	5	4	3	3	5
		2	b	a	a	a	a	a	a	a	b	a	a	a	g			a	e	a	a	a	a	a	b	a	c			c	c	c	a	a	a	a	b	a	c	c	b	c	c	c	4	3	2	2	2
		2	a	g	g	e	b	b	e	d	a	e	d	e	e	c		b		c	c	c	a	c	f	a	a	c,d	c	a	a	g		b	c	a	d	d	c	c	b	d	c	d	4	4	3	2	5
		2	a	d	g	f	b	g	e	e	a	a	b,c,d,e,f	b,d	e	b		c		b	b	b	b	a	f	e	a	a,b	c	b	a	b	c	c	a	a	d	a	b	a	a	a	a	a	1	2	1	3	1
		2	a	g	e	d	b	b	c	d	a	a	c	b	d			c		b	a	b	b	b	c	c	b			a	b	f	a	d	c	a	c	b	c	a	b	c	b	b	5	3	3	5	5
		2	a	c	g	f	b	b	b	e	a	c	c	d	e	b	5	c		a	a	a	b	a	b	a	a	c	b	b	a	b	a	c	c	b	b	c	b	b	c	d	d	d	5	5	5	5	5
		2	b	a	a	a	a	a	a	a	b	a	a	a	e	b		a	c	a	a	a	a	a	f	a	a	b	a	c	c	g		a	a	b	a	a	c	b	c	d	c	d	5	4	4	3	5
		2	a	g	a	a	a	a	a	a	b	a	a	a	e	b		a	a	c	c	c	e	c	f	f	a	b,d	c	c	b	e	b	c	c	a	c	c	c	c	b	d	b	d	4	3	3	4	4
		2	a	f	g	d	b	e	e	d	a	a	b	d	e	b		c		a	a	a	b	a	a	a	a	a,c	c	a	c	c	b	a	c	a	c	b	c	c	b	a	c	c	4	3	3	5	5
		2	a	f	g	e	e	e	e	d	a	a	c	b	e	b		c		c	c	c	b	a	a	a	a	a,b,c,d	c	b	c	g		a	c	a	c	c	c	c	b	d	c	c	4	4	3	4	4
		2	b	a	a	a	a	a	a	a	b	a	a	a	g			a	e	a	a	a	b	b	b	a	a	b	a	a	a	e	a	a	a	a	c	c	b	b	b	d	b	d	5	5	2	1	5
		2	b	a	a	a	a	a	a	a	b	a	a	a	g			a	e	c	c	c	e	c	f	f	c			c	c	g		a	a	a	b	a	c	c	c	d	d	a	4	4	4	3	4
		2	a	f	a	a	a	a	a	a	a	a	a	a	d			a	a	b	a	a	b	c	a	a	a	a	b	a	a	a	a	a	a	b	a	a	a	a	b	b	a	a	4	4	4	4	4
		2	a	d	a	a	a	a	a	a	b	a	a	a	g			a	a	c	c	c	e	c	f	f	c			c	a	c	a	c	a	b	b	b	c	b	b	d	b	c	4	4	3	3	5
		2	a	g	e	e	d	g	e	e	a	c	e	b	c			c		c	c	c	e	c	f	a	a	a	c	c	c	c	a	a	c	a	d	c	c	b	c	d	c	d	2	3	2	4	2
		2	a	g	a	a	a	a	a	a	b	a	a	a	e	b	4	a	a	c	c	c	a	a	b	a	a	b	b	a	b	d	a	a	c	a	c	c	c	c	b	d	c	c	5	4	2	5	5
		2	b	a	a	a	a	a	a	a	b	a	a	a	g			a	e	c	c	c	e	c	f	f	c			c	c	g		a	a	a	a	a	b	b	c	d	a	d	5	5	5	2	5
		2	a	d	f	e	b	b	e	e	a	a	g1	f	e	a	10	b		a	a	a	b	a	f	d	a	a,b,c,d	a	c	c	e	a	b	d	a	d	d	a	b	a	b	c	b	3	3	1	4	5
		2	a	f	f	e	b	e	e	d	a	a	g1	f	e	a	10	b		a	a	a	b	a	f	d	a	a,b,c,d	a	c	a	e	a	a	c	a	d	c	a	b	c	c	c	b	3	2	3	3	2
		2	b	a	a	a	a	a	a	a	b	a	a	a	e	b	10	a	e	a	a	a	b	b	a	a	b			b	b	e	d	a	a	a	a	a	b	b	c	d	c	d	5	2	2	5	5
		2	b	a	a	a	a	a	a	a	b	a	a	a	c			a	d	c	c	c	e	c	f	f	c			c	c	g		c	a	a	a	a	c	b	b	a	c	c	5	4	3	5	5
		2	b	a	a	a	a	a	a	a	b	a	a	a	g			a	b	a	a	a	e	a	f	f	a	d	a	a	a	e	a	a	a	a	a	a	b	b	b	d	b	d	5	5	4	5	5
		2	a	g	b	b	b	g	e	e	b	a	f	f	a			a	e	c	c	b	c	c	a	a	b			a	a	d	b	c	b	b	a	c	b	a	c	d	a	a	4	4	3	3	2
		2	a	b	a	a	a	a	a	a	a	a	a	a	f			a	a	c	c	c	e	c	f	a	c			c	b	g		a	a	a	a	b	b	b	c	d	b	d	5	5	4	3	5
		2	a	b	g	d	b	c	c	b	a	g	e	d	e	c	10	b		c	c	c	e	a	a	a	a	d	c	c	c	e	b	d	c	a	d	c	a	b	c	d	d	d	4	4	2	4	5
		2	a	g	e	d	b	c	b	b	a	a	c	d	g			b		a	a	a	b	a	f	f	c			a	c	g	a	a	c	a	b	c	c	c	c	c	c	c	4	4	4	3	4
		2	a	b	g	d	b	c	b	b	a	c	c	b	d			b		a	a	a	a	a	f	b	a	a	a	a	b	g	a	a	c	a	d	c	c	b	b	c	c	d	5	5	5	5	5
		2	a	g	c	c	b	c	b	b	a	c	e	f	c			b		c	a	a	b	c	f	f	a	b,d	a	c	a	g		c	c	a	c	c	c	b	b	d	b	c	4	3	3	4	4
		2	b	a	a	a	a	a	a	a	a	a	a	a	e	b	20	a	a	c	a	a	b	b	f	a	a	a,c	c	b	c	e	a	d	a	a	a	a	c	b	a	d	c	c	5	5	4	4	1
		2	a	f	d	c	b	e	e	c	a	g	c	d	e	b	d	b		b	b	b	d	b	f	a	a	a	b	b	a	e	b	a	d	a	d	d	a	a	b	c	d	c	4	4	4	4	4
		2	a	e	e	d	b	h13	e	e	a	f	f	d	d			b		c	c	c	d	a	c	a	a	a,b	c	a	b	g		d	c	a	d	b	b	b	b	d	c	d	5	4	3	2	5
		2	a	f	a	a	a	a	a	a	a	d	a	a	e	b		a	a	a	c	a	e	c	a	a	c			b	c	c	a	a	c	b	c	d	c	b	b	d	c	d	5	4	4	4	5
		2	a	c	b	b	d	c	b	e	b	a	d	f	e	c		b	d	c	a	a	b	c	f	f	c			a	c	g		b	b	a	c	c	c	c	c	d	b	c	1	1	1	1	1
		2	a	e	e	d	d	h13	e	e	a	g	b	e	g			b		c	c	c	e	c	e	f	c			c	c	g		c	c	a	c	c	c	b	c	c	c	a	3	3	2	3	4
		2	b	a	a	a	a	a	a	a	b	a	a	a	g			a	b	b	b	b	d	a	f	b	b			a	b	g		a	a	a	a	a	b	b	c	d	b	c	5	5	5	5	5
		2	a	d	a	a	a	a	a	a	a	a	a	a	e	b		a	e	b	b	c	e	c	f	f	a	a,b	a	c	c	g		a	a	b	a	a	b	b	b	c	c	c	5	3	3	5	5
		2	a	e	f	e	c	e	e	d	a	a	e	f	g			b		c	c	c	e	a	f	f	c			c	c	g		a	c	a	c	c	b	c	b	c	b	c	3	3	4	4	3
		1	a	f	a	a	a	a	a	a	a	d	a	a	e	b		a	a	a	c	a	e	c	a	a	c			b	c	c	a	a	c	b	c	d	c	b	b	d	c	d	5	4	4	4	5
		1	a	f	a	a	a	a	a	a	a	a	a	a	d			a	a	b	a	a	b	c	a	a	a	a	b	a	a	a	a	a	a	b	a	a	a	a	b	b	a	a	4	4	4	4	4
		1	a	d	a	a	a	a	a	a	b	a	a	a	g			a	a	c	c	c	e	c	f	f	c			c	a	c	a	c	a	b	b	b	c	b	b	d	b	c	4	4	3	3	5
		1	a	b	e	e	b	g	e	e	a	c	e	b	c			c		c	c	c	e	c	f	a	a	a	c	c	c	c	a	a	c	a	d	c	c	b	c	d	c	d	2	3	2	4	2
		1	a	g	a	a	a	a	a	a	b	a	a	a	e	b	4	a	a	c	c	c	a	a	b	a	a	b	b	a	b	d	a	a	c	a	c	c	c	c	b	d	c	c	5	4	2	5	5
		1	b	a	a	a	a	a	a	a	b	a	a	a	g			a	e	c	c	c	e	c	f	f	c			c	c	g		a	a	a	a	a	b	b	c	d	a	d	5	5	5	2	5
		1	a	d	f	e	b	b	e	e	a	a	g1	f	e	a		b		a	a	a	b	a	f	d	a	a,b,c,d	a	c	c	e	a	b	d	a	d	d	a	b	a	b	c	b	3	3	1	4	5
		1	a	f	f	e	b	e	e	d	a	a	g1	f	e	a		b		a	a	a	b	a	f	d	a	a,b,c,d	a	c	a	e	a	a	c	a	d	c	a	b	c	c	c	b	3	2	3	3	2
		1	b	a	a	a	a	a	a	a	b	a	a	a	e	b		a	e	a	a	a	b	b	a	a	b			b	b	e	d	a	a	a	a	a	b	b	c	d	c	d	5	2	2	5	5
		1	b	a	a	a	a	a	a	a	b	a	a	a	c			a	d	c	c	c	e	c	f	f	c			c	c	g		c	a	a	a	a	c	b	b	a	c	c	5	4	3	5	5
		1	b	a	a	a	a	a	a	a	b	a	a	a	g			a	b	a	a	a	e	a	f	f	a	d	a	a	a	e	a	a	a	a	a	a	b	b	b	d	b	d	5	5	4	5	5
		1	a	g	b	b	b	g	e	e	b	a	f	f	a			a	e	c	c	b	c	c	a	a	b			a	a	d	b	c	b	b	a	c	b	a	c	d	a	a	4	4	3	3	2
		1	a	b	a	a	a	a	a	a	a	a	a	a	f			a	a	c	c	c	e	c	f	a	c			c	b	g		a	a	a	a	b	b	b	c	d	b	d	5	5	4	3	5
		1	a	g	g	d	b	c	c	b	a	g	e	d	e	c		b		c	c	c	e	a	a	a	a	d	c	c	c	e	b	d	c	a	d	c	a	b	c	d	d	d	4	4	2	4	5
		1	a	b	e	d	b	c	b	b	a	a	c	d	g			b		a	a	a	b	a	f	f	c			a	c	g	a	a	c	a	b	c	c	c	c	c	c	c	4	4	4	3	4
		1	a	b	g	d	b	c	b	b	a	c	c	b	d			b		a	a	a	a	a	f	b	a	a	a	a	b	g	a	a	c	a	d	c	c	b	b	c	c	d	5	5	5	5	5
		1	a	g	c	c	b	c	b	b	a	c	e	f	c			b		c	a	a	b	c	f	f	a	b,d	a	c	a	g		c	c	a	c	c	c	b	b	d	b	c	4	3	3	4	4
		1	b	a	a	a	a	a	a	a	a	a	a	a	e	b	20	a	a	c	a	a	b	b	f	a	a	a,c	c	b	c	e	a	d	a	a	a	a	c	b	a	d	c	c	5	5	4	4	1
		1	a	f	g	d	b	e	e	c	a	g	c	d	e	b		b		b	b	b	d	b	f	a	a	a	b	b	a	e	b	a	d	a	d	d	a	a	b	c	d	c	4	4	4	4	4
		1	a	e	e	d	b	h13	e	e	a	f	f	d	d			b		c	c	c	d	a	c	a	a	a,b	c	a	b	g		d	c	a	d	b	b	b	b	d	c	d	5	4	3	2	5
		4	b	a	a	a	a	a	a	a	a	a	a	a	g			a	a	a	c	c	e	a	f	a	b			a	c	g		b	a	a	b	b	b	b	b	d	b	d	5	4	3	3	5
		4	a	b	g	g	e	h	e	e	a	g	g	b,c,d,e	g			e		c	c	c	e	c	a	a	a	a,b,c,d	a	a	a	f	b	d	b	b	b	b	c	c	a	b	b	a	5	3	3	5	5
		4	a	f	e	b	b	c	e	e	a	g	c	d	e	b		c		a	a	b	a,b	a	f	a	b			b	a	f	a	d	d	b	d	d	c	c	c	d	c	d	5	4	4	5	5
		4	a	d	b	f	c	d	b	f	a	d	c	e	b			a	b	b	c	a	c	b	d	a	b			b	c	d	c	c	c	b	d	a	a	c	b	b	a	d	1	2	3	5	5
		4	a	b	g	e	b	b	e	c	a	e	c	d	f			c		a	c	a	e	c	f	a	a	b	c	c	c	g		c	d	a	d	d	c	c	b	d	c	d	5	5	3	5	5
		4	b	a	a	a	a	a	a	a	b	a	a	a	g			a	e	a	c	c	e	b	f	f	b			c	b	d	a	c	a	a	a	b	b	b	c	d	c	c	4	3	4	4	4
		4	a	e	a	a	a	a	a	a	a	f	a	a	b			a	c	c	c	c	e	c	f	f	a	b	c	c	c	b2	a	c	c	b	c	d	b	b	c	d	b	c	4	4	2	5	5
		4	a	f	c	b	b	h4	e	c	a	a	c	d	g			c		a	a	c	e	a	f	f	a	b	c	c	c	g		a	d	a	d	d	c	c	b	b	c	a	2	2	2	4	5
		4	a	d	g	d	b,d	b	e	e	a	a	e	f	g			b		c	c	c	a	a	a	a	a	a	c	b	b	g		c	d	a	d	d	c	c	c	d	c	a	4	4	3	3	4
		4	a	d	e	d	b	h7	e	c,e	a	a	c,e,f	d	g			a		a	a	a	b	a	a	a	c			c	b	g		c	c	b	c	c	c	c	c	c	c	c	4	4	4	4	4
		4	a	e	g	e	b	b	e	d	b	f	f	d	g			c		a	c	c	d	b	a	a	a	a	b	b	b	g		b	d	b	d	d	c	c	b	d	d	c	5	2	5	1	5
		4	a	g	f	d	b	c	e	d	a	c	g1	g3	g			b		c	c	c	e	a	a	a	c			c	a	c	b	d	d	a	d	d	c	c	c	d	c	c	4	3	3	4	3
		4	a	g	e	d	b	e	e	d	a	a	g1	f	b4			a		a	c	a	b	a	f	f	a	b	a	a	a	d	a	b	d	a	d	d	c	c	b	d	d	d	3	3	3	3	3
		4	a	e	a	a	a	a	a	a	b	a	a	a	b			a	d	c	c	c	e	a	e	a	a	b,d	b	a	b	b		c	c	b	b	c	b	b	a	d	c	c	4	1	2	3	5
		4	a	c	a	a	a	a	a	a	a	a	a	a	b			a	c	a	c	c	a	a	f	c	c			a	c	g		a	b	a	c	d	b	b	a	d	b	d	5	5	3	4	5
		4	b	a	a	a	a	a	a	a	b	a	a	a	e	a		a	d	b	a	a	b	a	e	a	b			b	b	e	d	a	d	a	a	a	b	b	a	d	b	c	3	3	3	3	3
		3	b	a	a	a	a	a	a	a	b	a	a	a	g			a	e	b	b	c	e	c	f	f	c			c	c	g		d	a	a	a	a	b	b	b	d	a	d	5	5	4	3	5
		3	b	a	a	a	a	a	a	a	b	a	a	a	b4			a	c	c	c	c	b	a	f	c	a	a,b,c,d	b	a	b	a	a	a	a	a	a	b	b	b	b	d	a	d	5	5	5	5	5
		3	a	g	a	a	a	a	a	a	a	a	a	a	d			a	c	a	c	a	b	a	f	f	a	b	a	c	c	g		b	a	a	a	c	b	b	a	d	c	d	5	4	3	5	5
		3	b	a	a	a	a	a	a	a	b	a	a	a	g			a	e	a	a	c	e	c	f	f	a	c	a	c	a	g		c	a	b	a	a	b	b	b	d	b	d	5	5	5	5	5
		3	b	a	a	a	a	a	a	a	b	a	a	a	g			a	e	c	c	c	e	c	f	f	c			c	c	g		c	a	a	a	b	b	b	b	d	b	d	4	4	3	4	4
		3	a	c	a	a	a	a	a	a	b	a	a	a	b			a	a	b	b	a	b	b	a	a	b			b	c	b	a	a	b	a	b	b	b	b	b	d	b	d	5	5	3	5	5
		3	b	a	a	a	a	a	a	a	b	a	a	a	c			a	e	a	c	a	e	c	f	a	c			c	c	g	a	a	a	b	b	b	b	b	b	d	b	d	5	5	3	4	5
		3	a	e	d	b	d	b	g	e	a	d	f	d	c			b		a	a	a	b	b	e	a	c			a	a	d	b	a	c	b	c	c	c	b	b	d	c	d	5	5	5	5	5
		3	a	b	g	f	b	b	e	e	a	f	g1	d	e	b		d		c	c	c	e	b	a	a	c			c	c	g	b	d	d	a	d	d	c	c	b	d	b	d	4	5	3	3	4
		3	a	e	a	a	a	a	a	a	a	a	a	a	e	b		a	a	a	a	a	b	c	f	a	c			c	c	g		d	a	b	a	a	c	b	c	d	a	d	5	4	3	4	5
		3	a	g	d	d	d	c	d	e	a	a	c	d	e	b		c		c	c	c	e	c	f	f	c			c	c	g	d	a	d	b	d	d	a	b	c	d	b	c	2	1	2	3	4
		3	a	c	g	f	b	h7	e	d	a	g	g1	d	g			c		a	a	a	e	a	a	a	b			a	a	g		b	a	b	a	a	c	b	a	a	a	c	2	2	2	2	2
		3	a	e	e	b	d	b	g	e	a	b	b	g5	b4			b		a	a	a	a	a	a	a	a	a	a	a	a	d	c	c	c	b	c	c	b	b	b	b	b	a	5	4	3	5	5
		3	a	f	a	a	a	a	a	a	b	a	a	a	c			a	a	a	a	a	b	a	e	c	a	a	b	c	c	g	d	d	a	a	c	b	c	a	c	b	c	b	2	3	2	5	4
		3	a	c	g	d	d	h4	c	c	a	e	f	d	e	a		b		a	a	a	a	a	a	a	a	b	a	b	c	f	c	d	a	b	c	a	b	c	b	c	c	d	5	3	4	2	2
		2	a	f	f	e	b	e	e	e	b	a	d	f	g			c		a	a	a	e	a	f	f	c			c	c	g	a	a	a	a	d	d	c	a	b	d	b	a	5	5	5	5	5
		2	a	c	b	b	b	g	e	e	b	a	e	d	a			a	b	a	a	b	c	a	c	a	b			a	c	e	c	a	d	b	b	c	b	a	c	c	b	a	1	1	1	1	1
		2	a	g	d	c	b	g	e	e	b	a	e	f	e	c		b		c	b	c	e	a	f	f	c			c	b	g		a	c	b	c	c	c	b	c	c	c	a	3	3	2	3	2
		2	a	f	g	d	b	b	e	c	a	a	b	d	b			b		a	c	a	d	c	a	a	a	a,c	c	b	b	g		b	c	a	d	d	c	c	c	d	c	d	5	4	3	3	4
		2	b	a	a	a	a	a	a	a	b	a	a	a	c			a	e	a	a	a	a	a	f	a	a	b	a	a	a	g		a	a	a	a	a	b	b	c	d	a	d	5	5	4	5	5
		2	a	e	a	a	a	a	a	a	a	a	a	a	g			a	e	a	a	a	a	a	f	a	a	b	a	a	c	g		b	b	a	b	c	b	b	c	d	a	c	5	5	4	5	5
		2	b	a	a	a	a	a	a	a	b	a	a	a	g			a	e	c	c	b	a	a	e	f	a	b	c	a	a	g		a	a	b	a	a	b	b	a	d	a	d	5	2	2	3	4
		2	a	e	a	a	a	a	a	a	a	a	a	a	e	b	4	a	c	c	a	c	b	b	f	a	a	a	c	c	b	f		a	b	a	c	c	c	b	c	d	b	c	5	4	4	4	5
		2	a	e	a	a	a	a	a	a	a	b	a	a	e	b	7	a	d	c	a	a	e	c	f	a	c			c	c	g	a	a	a	a	a	b	c	c	c	d	b	c	5	4	3	5	5
		2	b	a	a	a	a	a	a	a	b	b	a	a	f			a	e	a	c	a	c	a	d	a	a	d	b	b	a	d	a	a	c	b	c	b	b	c	a	b	d	a	4	4	2	3	2
		2	a	g	f	c	d	b	g	d	a	g	e	e	g			b		c	a	a	a	a	a	a	a	a,b,d	b	b	b	f		d	c	a	c	c	c	b	c	d	c	d	3	4	3	3	3
		2	a	f	g	e	b	e	e	d	a	e	c	d	b			c		a	a	a	e	b	a	f	c			c	c	f	b	b	a	a	b	a	c	c	c	c	b	c	5	4	3	5	5
		2	a	b	a	a	a	a	a	a	b	a	a	a	g			a	d	a	c	c	b	b	f	b	a	a,c	b	b	b	g	a	a	a	a	a	a	b	b	c	d	c	d	5	5	5	5	5
		1	b	a	a	a	a	a	a	a	b	a	a	a	g			a	e	a	a	a	b	a	f	f	c			c	b	g		c	b	a	a	a	b	b	b	c	b	c	4	4	2	4	5
		1	b	a	a	a	a	a	a	a	a	c	a	a	b5			a	a	c	c	c	e	c	a	b	a	b,c	c	b	b	g		b	a	b	b	b	c	c	c	b	d	b	1	2	3	4	5
		1	a	g	a	a	a	a	a	a	a	a	a	a	e	b	10	a	d	c	c	c	e	c	d	f	c			c	a	e	a	a	b	a	c	c	b	b	c	d	b	c	5	4	4	4	4
		1	a	d	e	d	b	c,g,h7	e	e	a	f	e	d,e	g			b		b	b	b	e	b	a	a	c			c	b	f	a	a	d	a	d	d	c	c	b	c	d	b	3	3	2	3	3
		1	b	a	a	a	a	a	a	a	a	a	a	a	e	b	2	a	e	b	a	a	e	a	a	a	c			b	a	d	a	a	a	b	a	b	c	b	b	d	b	c	4	4	3	5	5
		1	a	e	f	f	b	c	e	e	a	b	g	d	e	b		c		a	a	a	a,b	a	a	a	c			c	c	e	a	d	d	a	d	c	b	b	c	d	c	d	5	5	5	5	5
		1	a	g	a	a	a	a	a	a	a	b	a	a	a			a	d	c	c	c	e	c	f	f	c			c	c	g		d	a	a	b	a	b	b	c	d	b	d	5	4	3	5	5
		1	a	g	b	b	d	b	g	d	b	a	e	f	b			a	d	c	c	b	e	c	f	f	c			c	c	g		b	b	a	c	a	c	c	b	d	c	d	5	5	5	5	5
		1	a	g	a	a	a	a	a	a	b	a	a	a	e	b		a	e	c	c	b	c	c	e	d	c			c	c	b2	b	d	a	b	c	d	c	c	c	b	d	d	1	1	1	1	1
		1	b	a	a	a	a	a	a	a	a	a	a	a	g			a	a	a	c	c	e	a	f	a	b			a	c	g		b	a	a	b	b	b	b	b	d	b	d	5	4	3	3	5
		1	a	b	g	g	e	h	e	e	a	g	g	b,c,d,e	g			e		c	c	c	e	c	a	a	a	a,b,c,d	a	a	a	f	b	d	b	b	b	b	c	c	a	b	b	a	5	4	3	5	5
		1	a	f	g	b	b	c	e	e	a	g	c	d	e	b		c		a	a	b	a,b	a	f	a	b			b	a	f	a	d	d	b	d	d	c	c	c	d	c	d	5	4	4	5	5
		1	a	d	b	f	c	d	b	f	a	d	c	e	b			a	b	b	c	a	c	b	d	a	b			b	c	d	c	c	c	b	d	a	a	c	b	b	a	d	1	2	3	5	4
		1	a	b	g	e	b	b	e	c	a	e	c	d	f			c		a	c	a	e	c	f	a	a	b	c	c	c	g		c	d	a	d	d	c	c	b	d	c	d	5	5	3	5	5
		1	b	a	a	a	a	a	a	a	b	a	a	a	g			a	e	a	c	c	e	b	f	f	b			c	b	d	a	c	a	a	a	b	b	b	c	d	c	c	4	3	4	4	4
		1	a	e	a	a	a	a	a	a	a	f	a	a	b			a	c	c	c	c	e	c	f	f	a	b	c	c	c	b2	a	c	c	b	c	d	b	b	c	d	b	c	4	4	2	5	5
		1	a	f	g	e	b	h4	e	c	a	b	c	d	g			c		a	a	c	e	a	f	f	a	b	c	c	c	g		a	d	a	d	d	c	c	b	b	c	a	2	2	2	4	4
		1	a	d	g	b	b,d	b	e	e	a	b	e	f	g			b		c	c	c	a	a	a	a	a	a	c	b	b	g		c	d	a	d	d	c	c	c	d	c	a	4	4	3	3	4
		1	a	d	g	b	b	h7	e	c,e	a	b	c,e,f	d	g			b		a	a	a	b	a	a	a	c			c	b	g		c	c	b	c	c	c	c	c	c	c	c	4	4	4	4	4
		1	a	e	g	e	b	b	e	d	b	f	f	d	g			c		a	c	c	d	b	a	a	a	a	b	b	b	g		b	d	b	d	d	c	c	b	d	d	c	5	2	5	1	5
		1	a	g	g	b	b	c	e	d	a	c	g1	g3	g			b		c	c	c	e	a	a	a	c			c	a	c	b	d	d	a	d	d	c	c	c	d	c	c	4	3	3	4	3
		1	a	g	e	d	b	e	e	d	a	a	g1	f	b4			a		a	c	a	b	a	f	f	a	b	a	a	a	d	a	b	d	a	d	d	c	c	b	d	d	d	3	3	3	3	3
		1	a	e	a	a	a	a	a	a	b	a	a	a	b			a	d	c	c	c	e	a	e	a	a	b,d	b	a	b	b		c	c	b	b	c	b	b	a	d	c	c	4	1	2	3	5
		1	a	c	a	a	a	a	a	a	a	a	a	a	b			a	c	a	c	c	a	a	f	c	c			a	c	g		a	b	a	c	d	b	b	a	d	b	d	5	5	3	4	5
		1	b	a	a	a	a	a	a	a	b	a	a	a	e	a		a	d	b	a	a	b	a	e	a	b			b	b	e	d	a	d	a	a	a	b	b	a	d	b	c	3	3	3	3	3
		1	b	a	a	a	a	a	a	a	b	a	a	a	g			a	e	b	b	c	e	c	f	f	c			c	c	g		d	a	a	a	a	b	b	b	d	a	d	5	5	4	3	5
		1	b	a	a	a	a	a	a	a	b	a	a	a	b4			a	c	c	c	c	b	a	f	c	a	a,b,c,d	b	a	b	a	a	a	a	a	a	b	b	b	b	d	a	d	5	5	5	5	5
		1	a	g	a	a	a	a	a	a	a	a	a	a	d			a	c	a	c	a	b	a	f	f	a	b	a	c	c	g		a	a	a	a	c	b	b	a	d	c	d	5	4	3	5	5
		1	b	a	a	a	a	a	a	a	b	a	a	a	g			a	e	a	a	c	e	c	f	f	a	c	a	c	a	g		c	a	b	a	a	b	b	b	d	b	d	5	5	5	5	5
		1	b	a	a	a	a	a	a	a	b	a	a	a	g			a	e	c	c	c	e	c	f	f	c			c	c	g		c	a	a	a	b	b	b	b	d	b	d	4	4	3	4	4
		1	a	c	a	a	a	a	a	a	b	a	a	a	b			a	a	b	b	a	b	b	a	a	b			b	c	b	a	a	b	a	b	b	b	b	b	d	b	d	5	5	3	5	5
		1	b	a	a	a	a	a	a	a	b	a	a	a	c			a	e	a	c	a	e	c	f	a	c			c	c	g	a	a	a	b	b	b	b	b	b	d	b	d	5	5	3	4	5
		1	a	e	d	b	d	b	g	e	a	d	f	d	c			b		a	a	a	b	b	e	a	c			a	b	d	b	a	c	b	c	c	c	b	b	d	c	d	5	5	5	5	5
		1	a	b	g	f	b	b	e	e	a	f	g1	d	e	b		d		c	c	c	e	b	a	a	c			c	c	g	b	d	d	a	d	d	c	c	b	d	b	d	4	5	3	3	4
		1	a	e	a	a	a	a	a	a	a	a	a	a	e	b		a	a	a	a	a	b	c	f	a	c			c	c	g		d	a	b	a	a	c	b	c	d	a	d	5	4	3	4	5
		1	a	g	d	d	d	c	d	e	a	a	c	d	e	b		c		c	c	c	e	c	f	f	c			c	c	g	d	a	d	b	d	d	a	b	c	d	b	c	2	1	2	3	4
		1	a	c	g	f	b	h7	e	d	a	g	g1	d	g			c		a	a	a	e	a	a	a	b			a	a	g		b	a	b	a	a	c	b	a	a	a	c	2	2	2	2	2
		1	a	e	e	b	d	b	g	e	a	b	b	g5	b4			b		a	a	a	a	a	a	a	a	a	a	a	a	d	c	c	c	b	c	c	b	b	b	b	b	a	5	4	3	5	4
		1	a	f	a	a	a	a	a	a	b	a	a	a	c			a	a	a	a	a	b	a	e	c	a	a	b	c	c	g	d	d	a	a	c	b	c	a	c	b	c	b	2	3	2	5	4
		1	a	c	g	b	d	h4	c	c	a	e	f	d	e	c		b		a	a	a	a	a	a	a	a	b	a	b	c	f	c	d	a	b	c	a	b	c	b	c	c	d	5	3	4	2	2
		1	a	f	f	e	b	e	e	e	b	a	d	f	g			c		a	a	a	e	a	f	f	c			c	c	g	a	a	a	a	d	d	c	a	b	d	b	a	5	5	5	5	5
		1	a	c	b	b	b	g	e	e	b	a	e	d	a			a	b	a	a	b	c	a	c	a	b			a	c	e	c	a	d	b	b	c	b	a	c	c	b	a	1	1	1	1	1
		1	a	g	d	c	b	g	e	e	b	a	e	f	e	c		b		c	b	c	e	a	f	f	c			c	b	g		a	c	b	c	c	c	b	c	c	c	a	3	3	2	3	2
		1	a	f	g	d	b	b	e	c	a	a	b	d	b			b		a	c	a	d	c	a	a	a	a,c	c	b	b	g		b	c	a	d	d	c	c	c	d	c	d	5	4	3	3	4
		1	b	a	a	a	a	a	a	a	b	a	a	a	c			a	e	a	a	a	a	a	f	a	a	b	a	a	a	g		a	a	a	a	a	b	b	c	d	a	d	5	5	4	5	5
		1	a	e	a	a	a	a	a	a	a	a	a	a	g			a	e	a	a	a	a	a	f	a	a	b	a	a	c	g		b	b	a	b	c	b	b	c	d	a	c	5	5	4	5	5
		1	b	a	a	a	a	a	a	a	b	a	a	a	g			a	e	c	c	b	a	a	e	f	a	b	c	a	a	g		a	a	b	a	a	b	b	a	d	a	d	5	2	2	3	4
		4	a	d	g	d	b	b	e	e	a	g	g1	f	d			e		a	c	b	b	a	f	f	c			c	c	g		c	b	a	b	b	c	c	c	b	b	c	4	1	1	4	4
		4	a	b	a	a	a	a	a	a	a	d	a	a	d			a	c	a	c	b	a,b	a	b	a	a	d	a	c	b	d	b	b	d	a	d	c	b	b	a	d	b	b	5	3	4	2	4
		4	a	f	a	a	a	a	a	a	a	a	a	a	e	b		a	c	c	c	c	e	c	f	a	c			c	c	a		a	b	a	b	b	c	b	c	d	b	d	5	5	3	3	4
		4	a	c	b	b	f	h5	g	b	a	d	c	e	e	c		b	a	c	c	a	b	b	b	a	c			c	b	g		b	c	a	c	c	c	c	c	d	c	c	4	2	2	4	4
		4	a	e	a	a	a	a	a	a	a	d	a	a	e	b		a	d	a	a	a	b	b	f	a	a	a	c	b	b	g	c	a	a	a	a	a	b	b	b	c	b	c	5	5	5	5	5
		4	a	c	b	b	d	c	g	b	a	a	e	f	d			a	b	a	c	c	d	a	a	a	c			a	b	g		a	c	a	b	c	c	c	c	d	c	c	4	4	3	2	4
		4	b	a	a	a	a	a	a	a	a	d	a	a	e	a	2	a	d	a	a	a	b	b	b	a	c			a	c	a		a	a	a	a	b	b	b	c	d	b	c	4	3	3	3	5
		4	a	f	a	a	a	a	a	a	a	b	a	a	e	c		a	d	a	a	a	b	b	e	a	c			a	b	e	b	c	b	a	b	c	c	b	b	d	b	c	5	4	4	4	5
		4	a	e	g	e	b	h6	e	e	a	b	f	d	e	b		b		a	a	c	e	b	f	a	a	b	a	a	c	g	c	c	a	a	d	b	b	b	c	c	c	d	5	5	5	5	5
		4	a	g	a	a	a	a	a	a	a	a	a	a	e	b		a	d	c	a	c	b	c	e	a	b			a	c	g		a	b	a	b	c	c	b	c	d	b	c	5	5	5	5	5
		4	b	a	a	a	a	a	a	a	b	a	a	a	e	b		a	b	a	c	a	e	b	f	a	b			a	b	g		d	b	a	b	c	c	b	b	c	b	c	4	4	3	4	4
		4	a	f	a	a	a	a	a	a	a	d	a	a	g			a	b	a	a	a	e	b	a	a	c			c	c	g		c	c	b	c	c	c	b	c	d	b	d	4	4	4	4	5
		4	a	f	a	a	a	a	a	a	a	c	a	a	e	b		a	d	c	a	c	e	a	f	b	a	a,b,c,d	a	a	c	g		a	b	a	b	b	b	b	c	d	b	d	5	5	4	5	5
		4	a	f	g	f	b	e	e	c	a	b	b	f	g			c		a	a	a	e	c	a	f	c			c	c	e	a	c	d	a	d	d	b	c	c	c	d	c	4	3	3	3	3
		4	b	a	a	a	a	a	a	a	b	a	a	a	a			a	e	c	c	c	e	c	f	f	c			c	c	g		a	a	a	a	a	b	b	b	c	b	d	3	3	3	3	3
		4	b	a	a	a	a	a	a	a	b	a	a	a	e	a	2	a	e	a	a	a	b	a	e	f	a	b	a	a	a	e	a	a	a	a	a	a	c	b	b	d	a	d	5	5	3	5	5
		4	a	b	g	f	b	h7	e	c	a	g	g1	g4	g			c		c	c	c	e	c	f	f	c			c	a	g	a	a	d	a	d	d	b	b	b	d	d	d	5	5	1	3	5
		4	a	d	g	g	g	h4	e	c	a	b	c	d	b4			c		a	a	b	e	c	f	a	c			b	a	g		b	d	a	d	d	c	b	c	b	c	b	3	2	3	1	4
		4	a	d	c	b	b	c,g,h4	e	e	a	g	g1	d,e	b4			b		c	c	c	e	b	a	a	b			b	b	g	a	a	d	a	d	d	c	c	c	a	d	a	1	1	1	1	1
		4	a	g	c	b	g	c	d	d	b	a	g	f	e	b		b		a	a	a	b	a	a	a	c			b	c	d	b	c	c	a	c	c	b	b	a	d	c	b	5	4	5	4	4
		4	a	e	g	e	b	b	e	e	a	b	g1	g4	e	b		c		a	a	a	b	a	e	a	a	d	a	a	a	e	b	c	d	b	d	d	a	b	c	d	c	d	5	4	3	3	5
		4	a	f	a	a	a	a	a	a	a	a	a	a	g			a	d	a	a	a	b	a	e	b	a	a	b	c	a	e	b	c	d	a	c	b	c	a	b	a	b	c	1	2	2	3	3
		4	b	a	a	a	a	a	a	a	b	a	a	a	e	a		a	b	a	a	a	b	b	e	a	a	b	a	a	c	g	a	a	a	a	b	b	c	b	a	c	b	d	5	2	4	5	5
		4	a	e	g	e	h	e	e	d	a	g	f	d	e	b		c		a	a	a	b	b	a	a	a	a	a	a	b	e	b	b	c	a	d	d	c	b	c	d	d	a	5	4	5	5	5
		4	a	b	a	a	a	a	a	a	a	a	a	a	g			a	e	c	c	c	a	c	f	f	c			c	c	g	a	c	a	a	a	a	c	b	c	d	b	d	5	4	3	5	4
		4	a	g	a	a	a	a	a	a	a	d	a	a	e	c		a	e	c	c	a	b	c	a	f	a	b,c,d	a	a	a	a	b	a	b	b	b	c	c	b	b	d	b	d	4	4	3	4	4
		4	a	g	b	b	g	b	g	d	a	b	e	f	d			a	e	c	c	c	e	c	f	f	c			c	c	g	a	c	a	a	c	c	b	b	c	d	b	d	5	4	3	3	5
		4	a	d	f	e	g	b	e	c	a	d	b	f	e	c		b		c	c	c	b	c	b	f	a	a,b	b	c	c	g		b	d	a	d	d	c	c	c	d	c	c	4	4	3	4	4
		4	b	a	a	a	a	a	a	a	b	a	a	a	e	c		a	b	c	c	c	b	a	f	b	a	a,b,d	b	a	c	e	a	a	a	a	a	a	b	b	b	d	b	c	5	4	4	5	5
		4	a	g	b	c	b	e	c	d	a	d	e	d	d			b	b	c	a	a	e	a	a	d	a	b	a	a	b	c	a	a	a	a	c	c	b	b	c	b	b	d	5	4	3	3	3
		4	b	a	a	a	a	a	a	a	b	a	a	a	g			a	e	c	c	c	b	a	f	f	c			c	c	g		a	a	b	b	b	c	b	c	c	b	b	3	2	3	2	4
		4	b	a	a	a	a	a	a	a	b	a	a	a	g			a	e	a	a	a	a	a	f	f	c			b	c	c	a	a	b	b	b	c	a	b	b	d	b	c	5	4	3	3	5
		4	b	a	a	a	a	a	a	a	a	c	a	a	g			a	b	c	a	c	b	a	b	a	c			a	c	g		c	a	a	a	a	c	b	a	d	b	c	5	4	3	5	5
		4	a	e	g	d	d	c,e.g	e	e	a	d	c	f	g			b		c	c	c	e	c	f	f	c			c	c	g	b	c	b	a	c	b	c	b	b	c	c	c	1	2	2	5	4
		4	a	f	e	d	d	b	e	e	a	d	c	f	g			b		c	c	c	e	c	f	f	c			c	c	g	b	a	d	a	d	c	a	b	c	d	c	d	4	4	3	5	5
		4	a	e	g	g	g	e	e	e	a	d	c	d	e	a		c		b	a	a	e	b	b	d	a	a	c	b	b	g		d	c	a	d	c	b	b	b	c	b	b	5	4	3	5	4
		4	a	e	g	f	b	h4	e	c	b	a	f	d	f			c		a	c	c	e	b	b	a	c			c	c	g		d	d	a	d	d	c	c	b	c	c	b	2	2	3	2	4
		4	b	a	a	a	a	a	a	a	b	a	a	a	e	b		a	e	a	c	a	b	c	f	a	c			a	c	g		a	a	a	a	a	c	b	c	d	b	d	5	5	3	3	5
		4	a	e	g	e	b	h	e	c	a	a	b	g3	g			c		c	c	a	b	b	a	a	c			b	c	g		b	c	a	d	c	c	c	c	d	c	c	4	5	3	3	5
		4	a	g	g	d	b	g	e	e	a	b	b	g3	g			c		c	c	c	e	c	b	a	c			c	c	f	a	a	c	a	a	a	c	b	b	c	c	a	4	4	3	3	5
		4	a	g	e	b	b	b	b	c	a	b	e	f	c			a		a	a	a	e	a	f	f	a	c	a	a	c	g		a	c	a	c	b	b	b	c	d	b	c	5	5	3	5	5
		4	a	d	g	e	b	c	e	e	a	e	c	d	e	c	10	c		c	c	c	e	c	f	f	a	e1	c	c	c	e	a	c	d	a	d	d	b	c	c	d	d	d	5	5	5	5	5
		4	b	a	a	a	a	a	a	a	b	a	a	a	g			a	a	c	c	c	e	c	f	f	c			c	c	g	a	a	a	a	a	a	b	b	b	c	c	d	5	5	5	5	4
		4	b	a	a	a	a	a	a	a	b	a	a	a	g			a	e	a	c	c	e	c	f	f	c			c	c	g		a	a	b	a	a	b	b	c	c	b	c	5	5	5	5	5
		4	b	a	a	a	a	a	a	a	b	a	a	a	g			a	e	c	c	c	e	c	f	f	c			a	c	a	c	a	c	a	b	a	b	b	c	c	a	a	3	3	3	3	3
		4	a	e	g	e	d	c,g	c	b	a	a	d	c	d			b		b	b	c	b	a	a	a	c			b	a	a	a	d	c	b	a	a	b	a	c	a	c	c	1	2	3	4	5
		4	a	g	a	a	a	a	a	a	a	a	a	a	e	c		a	d	a	a	b	a	c	a	a	a	b	a	c	c	g	a	b	b	a	a	c	b	b	b	d	b	c	4	4	4	4	4
		4	a	f	f	e	b	c	e	d	b	a	g1	g2	e	b		c		b	a	a	a	a	a	a	b			a	a	g		d	d	a	c	d	c	c	c	c	c	c	4	5	5	5	5
		4	a	g	b	b	d	b	g	d	b	a	e	f	g			a	a	c	c	c	e	c	f	f	c			c	c	g		c	b	a	a	a	c	c	c	d	a	c	4	4	3	3	4
		4	a	f	g	e	b	e	e	d	a	b	c	d	e	b		c		a	a	a	b	a	a	a	a	a,b,c	a	a	c	e	b	c	c	a	c	c	b	b	c	d	b	c	4	5	3	4	4
		4	a	f	g	d	b	h1	e	d	a	g	c	d	e	b		c		a	a	a	b	a	a	a	a	a,b,c	a	a	a	e	b	b	c	a	c	c	b	b	c	d	c	c	4	5	3	2	4
		4	a	g	a	a	a	a	a	a	b	a	a	a	g			a	a	a	c	c	b	c	f	f	c			c	c	g	d	c	d	b	d	d	c	c	c	d	d	d	4	4	1	2	4
		4	a	f	e	f	e	d	b	d	b	b	b	f	e	a		b		a	a	a	b	c	f	d	a	b,c,d	a	a	c	d	a	a	b	a	b	b	b	b	b	d	a	c	5	4	3	4	5
		4	a	f	a	a	a	a	a	a	b	a	a	a	g			a	e	c	c	c	e	a	f	f	c			c	c	g		a	a	a	a	a	b	b	c	d	a	d	5	5	3	5	5
		4	a	g	a	a	a	a	a	a	a	a	a	a	g			a	e	c	c	c	e	c	a	f	c			c	c	e	a	c	a	a	a	a	c	b	c	d	b	d	5	4	3	4	5
		3	a	g	c	c	b	c	e	d	a	a	e	f	g			a		c	c	c	e	c	a	f	c			c	b	e	a	a	a	a	d	a	c	b	c	d	c	d	4	4	4	4	4
		3	a	f	f	d	b	b	d	d	b	a	c	d	e	c	2	b		c	c	c	e	a	a	a	a	c	c	c	c	g		c	c	a	d	d	c	b	b	d	b	c	4	3	3	4	4
		3	a	g	e	d	b	e	e	d	a	d	d	d	d			b		a	c	a	b	c	f	f	c			c	c	f		a	c	a	c	b	c	b	c	c	b	c	3	4	3	4	4
		3	a	g	a	a	a	a	a	a	a	a	a	a	g			a	c	c	c	a	b	b	a	a	b			b	c	g	a	a	a	b	b	b	c	c	c	d	c	d	5	4	3	5	5
		3	a	g	d	d	d	c	c	d	a	e	c	d	g			c		b	b	a	d	a	a	f	b			b	b	d	a	a	d	a	c	c	b	b	b	c	c	d	1	1	5	3	4
		3	a	g	d	e	b	b	d	c	a	a	e	f	d			b		b	b	b	d	b	c	e	a	a	a	b	b	d	a	a	d	a	c	c	b	b	b	c	c	c	4	4	2	4	4
		3	a	g	a	a	a	a	a	a	a	d	a	a	e	c	5	a	b	a	c	c	b	c	b	a	a	a,b,c	c	c	b	f		a	a	a	b	b	b	b	b	d	b	c	5	4	3	4	5
		3	b	a	a	a	a	a	a	a	b	a	a	a	g			a	d	c	c	c	e	a	f	f	c			c	c	g	a	d	a	b	a	a	c	b	c	d	b	c	2	4	3	4	4
		3	b	a	a	a	a	a	a	a	b	a	a	a	e	c	2	a	a	c	a	c	e	c	f	e	c			a	c	g		a	a	a	a	a	c	c	b	d	a	c	5	4	3	2	5
		3	b	a	a	a	a	a	a	a	b	a	a	a	g			a	c	b	b	a	a	a	b	f	c			c	c	g		a	a	b	a	a	b	b	b	c	c	c	5	3	3	3	3
		3	b	a	a	a	a	a	a	a	b	a	a	a	e	b		a	d	a	c	a	b	a	f	a	a	a	b	c	c	g		c	a	a	a	a	b	b	a	a	a	c	5	4	3	5	5
		3	a	e	g	g	b	b	e	d	a	b	c	d	b5			c		c	c	c	e	a	a	a	c			c	b	g		a	c	a	d	d	c	b	c	d	c	d	5	4	2	3	4
		3	b	a	a	a	a	a	a	a	b	a	a	a	c			a	e	a	a	a	a	a	f	f	c			c	c	g		a	a	a	a	a	c	c	c	d	b	c	1	1	3	3	5
		3	a	f	g	e	b	c	e	d	a	b	e	f	e	c	10	b		a	a	c	b	a	e	d	a	a	a	a	a	e	a	a	c	a	c	c	b	b	b	d	b	d	5	4	4	3	5
		3	b	a	a	a	a	a	a	a	b	a	a	a	g			a	e	c	a	a	a	a	f	f	c			b	c	a	a	b	b	b	b	b	b	b	c	d	b	d	3	3	3	3	3
		3	a	e	g	e	b	e	e	d	a	b	f	d	d			c		a	a	a	b	b	a	f	a	a	a	b	b	g	b	b	d	a	d	d	a	b	c	d	d	a	5	1	5	1	5
		3	b	a	a	a	a	a	a	a	b	a	a	a	a			a	e	c	c	c	e	c	f	f	c			c	c	g		d	a	a	a	a	b	b	b	d	b	c	2	3	2	3	2
		3	b	a	a	a	a	a	a	a	b	a	a	a	e	c		a	e	a	a	a	b	a	f	f	a	b	a	c	a	e	a	a	a	a	a	a	c	b	b	d	a	c	5	5	3	4	5
		3	b	a	a	a	a	a	a	a	b	a	a	a	g			a	e	c	c	c	e	c	f	f	c			c	c	g	a	a	a	b	a	a	b	b	b	d	a	d	5	5	5	5	5
		3	a	b	a	a	a	a	a	a	a	d	a	a	c			a	e	a	a	a	b	a	a	a	a	b	a	b	a	d	a	a	a	a	a	c	b	b	c	d	b	d	5	4	3	3	4
		3	a	g	a	a	a	a	a	a	a	a	a	a	e	c		a	d	a	a	a	b	c	a	a	a	b	a	c	c	g	a	d	b	b	a	b	b	b	b	d	b	d	5	5	4	4	5
		3	b	a	a	a	a	a	a	a	b	a	a	a	e	c	5	a	e	c	c	c	e	c	e	f	c			c	c	e	a	a	a	b	a	a	c	b	a	d	a	d	5	4	3	4	4
		3	a	g	a	a	a	a	a	a	a	a	a	a	b4			a	b	a	a	a	a	c	f	a	a	c	a	a	a	g		a	a	a	a	b	b	b	b	d	c	d	5	5	4	4	4
		3	a	g	a	a	a	a	a	a	a	a	a	a	g			a	d	c	c	c	e	b	f	a	a	a	a	c	a	d	a	a	b	b	b	b	c	c	c	d	b	c	5	4	4	4	4
		3	b	a	a	a	a	a	a	a	a	b	a	a	e	a	2	a	e	a	a	a	b	a	d	f	a	a	b	a	a	e	a	a	b	a	a	b	a	b	b	d	b	c	5	1	3	4	5
		3	a	e	g	d	b	g	e	e	a	c	f	g3	e	b		c		a	a	a	e	a	a	a	a	a,b	c	c	c	f		c	d	b	d	d	b	b	b	d	d	a	5	5	3	5	5
		3	b	a	a	a	a	a	a	a	a	e	a	a	g			a	b	c	c	c	e	c	f	b	c			c	c	d	a	c	b	b	c	c	b	b	a	d	b	a	4	4	4	4	5
		3	a	d	f	e	b	g	e	e	a	e	f	g3	e	b		b		c	c	c	b	c	b	c	a	b	b	c	c	g		a	c	a	d	d	c	c	c	c	c	c	4	4	3	4	4
		3	b	a	a	a	a	a	a	a	b	a	a	a	e	c		a	c	a	a	a	b	a	f	c	a	a,b,c,d,e	c	c	c	g		a	a	a	a	a	b	b	b	d	b	d	5	5	3	4	5
		3	a	f	a	a	a	a	a	a	a	c	a	a	e	a	2	a	e	a	a	a	b	a	f	a	c			a	c	g		a	a	a	a	a	b	b	c	d	a	b	5	5	5	5	5
		3	b	a	a	a	a	a	a	a	a	a	a	a	e	b	10	a	a	c	c	c	b	a	a	a	b			b	c	a	a	a	a	a	a	a	b	b	c	d	a	c	5	5	3	4	5
		3	a	g	g	e	b	e	e	d	a	c	c	d	e	b	10	c		a	a	a	a	b	a	a	c			b	b	d	a	c	c	a	d	c	c	c	b	d	b	d	1	2	3	4	5
		3	a	g	a	a	a	a	a	a	a	a	a	a	e	b	10	a	b	a	c	c	c	c	f	f	c			c	c	g		b	b	a	a	b	b	b	c	c	b	c	5	4	4	5	5
		3	a	g	a	a	a	a	a	a	a	a	a	a	e	c		a	d	c	c	a	b	c	f	b	a	a	a	a	c	g		d	a	a	b	b	b	b	c	d	c	d	5	4	4	4	5
		3	a	g	g	e	b	h5	e	d	a	b	c	d	e	b	4	c		a	a	a	a	a	a	a	a	b	b	c	a	e	b	b	c	a	c	c	c	c	b	d	c	c	2	2	3	3	3
		3	a	f	g	e	b	h11	e	c	b	a	e	e	e	c		c		c	a	a	a	a	a	a	c			c	a	g		d	d	a	d	d	c	b	b	a	b	a	3	3	3	3	3
		3	a	g	a	a	a	a	a	a	b	a	a	a	e	c		a	e	c	c	c	e	c	f	f	c			c	c	g		c	a	a	a	a	c	c	c	a	b	c	4	3	3	4	4
		3	a	c	g	c	c	e	c	e	a	c	c	d	d			e		c	c	c	e	c	f	f	a	b	b	c	c	c	a	b	d	a	d	d	c	c	c	d	d	c	5	4	3	4	5
		3	a	d	b	b	b	c	b	e	a	a	c	d	d			b	b	c	c	c	c	c	f	f	c			c	c	c	a	c	c	a	c	c	c	c	c	c	c	d	5	5	3	4	5
		3	b	a	a	a	a	a	a	a	b	a	a	a	c			a	e	c	c	c	e	c	f	e	c			c	c	g		a	a	a	b	b	c	c	c	d	b	c	4	3	3	3	4
		3	a	e	a	a	a	a	a	a	a	f	a	a	e	b		a	b	a	a	a	e	a	a	f	c			a	a	g		a	a	a	b	b	b	b	b	d	b	d	5	5	3	5	5
		3	a	g	a	a	a	a	a	a	b	f	a	a	e	b		a	a	b	b	b	d	b	e	f	b			b	b	e	a	c	d	a	b	b	c	b	a	a	b	b	5	5	5	5	3
		3	a	f	g	e	b	h1	e	e	a	b	b,c,d,e,e	d	a			c		b	a	a	b	b	c	c	a	c	b	b	b	e	c	c	c	b	a	d	c	a	b	b	c	c	1	2	3	4	5
		3	a	d	g	d	b	b	e	e	a	g	g1	f	d			e		a	c	b	b	a	f	f	c			c	c	g		c	b	a	b	b	c	c	c	b	b	c	4	1	1	4	4
		3	a	b	a	a	a	a	a	a	a	d	a	a	d			a	c	a	c	b	a,b	a	b	a	a	d	a	c	b	d	b	b	d	a	d	c	b	b	a	d	b	b	5	3	4	2	4
		3	a	f	a	a	a	a	a	a	a	a	a	a	e	b		a	c	c	c	c	e	c	f	a	c			c	c	a		a	b	a	b	b	c	b	c	d	b	d	5	5	3	3	4
		3	a	c	b	b	f	h5	g	b	a	d	c	e	e	c		b	a	c	c	a	b	b	b	a	c			c	b	g		b	c	a	c	c	c	c	c	d	c	c	4	2	2	4	4
		3	a	e	a	a	a	a	a	a	a	d	a	a	e	b		a	d	a	a	a	b	b	f	a	a	a	c	b	b	g	c	a	a	a	a	a	b	b	b	c	b	c	5	5	5	5	5
		3	a	c	b	b	d	c	g	b	a	a	e	f	d			a	b	a	c	c	d	a	a	a	c			a	b	g		a	c	a	b	c	c	c	c	d	c	c	4	4	3	2	4
		3	b	a	a	a	a	a	a	a	a	d	a	a	e	a	2	a	d	a	a	a	b	b	b	a	c			a	c	a		a	a	a	a	b	b	b	c	d	b	c	4	3	3	3	5
		2	a	f	a	a	a	a	a	a	a	b	a	a	e	c		a	d	a	a	a	b	b	e	a	c			a	b	e	b	c	b	a	b	c	c	b	b	d	b	c	5	4	4	4	5
		2	a	e	g	e	b	h6	e	e	a	b	f	d	e	b		b		a	a	c	e	b	f	a	a	b	a	a	c	g	c	c	a	a	d	b	b	b	c	c	c	d	5	5	5	5	5
		2	a	g	a	a	a	a	a	a	a	a	a	a	e	b		a	d	c	a	c	b	c	e	a	b			a	c	g		a	b	a	b	c	c	b	c	d	b	c	5	5	5	5	5
		2	b	a	a	a	a	a	a	a	b	a	a	a	e	b		a	b	a	c	a	e	b	f	a	b			a	b	g		d	b	a	b	c	c	b	b	c	b	c	4	4	3	4	4
		2	a	f	a	a	a	a	a	a	a	d	a	a	g			a	b	a	a	a	e	b	a	a	c			c	c	g		c	c	b	c	c	c	b	c	d	b	d	4	4	4	4	5
		2	a	f	a	a	a	a	a	a	a	c	a	a	e	b		a	d	c	a	c	e	a	f	b	a	a,b,c,d	a	a	c	g		a	b	a	b	b	b	b	c	d	b	d	5	5	4	5	5
		2	a	f	g	b	b	e	e	c	a	b	b	f	g			c		a	a	a	e	c	a	f	c			c	c	e	a	c	d	a	d	d	b	c	c	c	d	c	4	3	3	3	3
		2	b	a	a	a	a	a	a	a	b	a	a	a	a			a	e	c	c	c	e	c	f	f	c			c	c	g		a	a	a	a	a	b	b	b	c	c	d	3	3	3	3	3
		2	b	a	a	a	a	a	a	a	b	a	a	a	e	a	2	a	e	a	a	a	b	a	e	f	a	b	a	a	a	e	a	a	a	a	a	a	c	b	b	d	a	d	5	5	3	5	5
		2	a	b	g	f	b	h7	e	c	a	g	g1	g4	g			c		c	c	c	e	c	f	f	c			c	a	g	a	a	d	a	d	d	b	b	b	d	d	d	5	5	1	3	5
		2	a	d	g	g	g	h4	e	c	a	b	c	d	b4			c		a	a	b	e	c	f	a	c			b	a	g		b	d	a	d	d	c	b	c	b	c	b	3	2	3	1	4
		2	a	d	c	b	b	c,g,h4	e	e	a	g	g1	d,e	b4			b		c	c	c	e	b	a	a	b			b	b	g	a	a	d	a	d	d	c	c	c	a	d	a	1	1	1	1	1
		2	a	g	c	b	g	c	d	d	b	a	g	f	e	b		b		a	a	a	b	a	a	a	c			b	c	d	b	c	c	a	c	c	b	b	a	d	c	b	5	4	5	4	4
		2	a	e	g	e	b	b	e	e	a	b	g1	g4	e	b		c		a	a	a	b	a	e	a	a	d	a	a	a	e	b	c	d	b	d	d	a	b	c	d	c	d	5	4	3	3	5
		2	a	f	a	a	a	a	a	a	a	a	a	a	g			a	d	a	a	a	b	a	e	b	a	a	b	c	a	e	b	c	d	a	c	b	c	a	b	a	b	c	1	2	2	3	3
		2	b	a	a	a	a	a	a	a	b	a	a	a	e	a		a	b	a	a	a	b	b	e	a	a	b	a	a	c	g	a	a	a	a	b	b	c	b	a	c	b	d	5	2	4	5	5
		2	a	e	g	e	h	e	e	d	a	g	f	d	e	b		c		a	a	a	b	b	a	a	a	a	a	a	b	e	b	b	c	a	d	d	c	b	c	d	d	a	5	4	5	5	5
		2	a	b	a	a	a	a	a	a	a	a	a	a	g			a	e	c	c	c	a	c	f	f	c			c	c	g	a	c	a	a	a	a	c	b	c	d	b	d	5	4	3	3	4
		2	a	g	a	a	a	a	a	a	a	d	a	a	e	c		a	e	c	c	a	b	c	a	f	a	b,c,d	a	a	a	a	b	a	b	b	b	c	c	b	b	d	b	d	4	4	3	4	4
		2	a	g	b	b	g	b	g	d	a	b	e	f	d			a	e	c	c	c	e	c	f	f	c			c	c	g	a	c	a	a	c	c	b	b	c	d	b	d	5	4	3	3	5
		2	a	d	f	e	g	b	e	c	a	d	b	f	e	c		b		c	c	c	b	c	b	f	a	a,b	b	c	c	g		b	d	a	d	d	c	c	c	d	c	c	4	4	3	4	4
		2	b	a	a	a	a	a	a	a	b	a	a	a	e	c		a	b	c	c	c	b	a	f	b	a	a,b,d	b	a	c	e	a	a	a	a	a	a	b	b	b	d	b	c	5	4	4	5	5
		2	a	g	b	c	b	e	c	d	a	d	e	d	d			b	b	c	a	a	e	a	a	d	a	b	a	a	b	c	a	a	a	a	c	c	b	b	c	b	b	d	5	4	3	3	3
		2	b	a	a	a	a	a	a	a	b	a	a	a	g			a	e	c	c	c	b	a	f	f	c			c	c	g		a	a	b	b	b	c	b	c	c	b	b	3	2	3	2	4
		2	b	a	a	a	a	a	a	a	b	a	a	a	g			a	e	a	a	a	a	a	f	f	c			b	c	c	a	a	b	b	b	c	a	b	b	d	b	c	5	4	3	3	5
		2	b	a	a	a	a	a	a	a	a	c	a	a	g			a	b	c	a	c	b	a	b	a	c			a	c	g		c	a	a	a	a	c	b	a	d	b	c	5	4	3	5	5
		2	a	e	e	d	d	c,e.g	e	e	a	d	c	f	g			b		c	c	c	e	c	f	f	c			c	c	g	b	c	b	a	c	b	c	b	b	c	c	c	1	2	2	5	4
		2	a	f	e	d	d	b	e	e	a	d	c	f	g			b		c	c	c	e	c	f	f	c			c	c	g	b	a	d	a	d	c	a	b	c	d	c	d	4	4	3	5	5
		2	a	e	g	g	g	e	e	e	a	d	c	d	e	a		c		b	a	a	e	b	b	d	a	a	c	b	b	g		b	d	a	d	c	b	b	b	d	c	b	5	4	2	3	4
		2	a	e	g	f	b	h4	e	c	b	a	f	d	f			c		a	c	c	e	b	b	a	c			c	c	f		d	d	a	d	d	c	c	b	c	c	b	2	2	3	2	4
		2	b	a	a	a	a	a	a	a	b	a	a	a	e	b		a	e	a	c	a	b	c	f	a	c			a	c	g		a	a	a	a	a	c	b	c	d	b	d	5	5	3	3	5
		2	a	e	g	e	b	h	e	c	a	a	b	g3	g			c		c	c	a	b	b	a	a	c			b	c	g		b	c	a	d	c	c	c	c	d	c	c	4	5	3	3	5
		2	a	g	g	d	b	g	e	e	a	b	b	g3	g			c		c	c	c	e	c	b	a	c			c	c	f	a	a	c	a	a	a	c	b	b	c	c	a	4	4	3	3	5
		2	a	g	e	b	b	b	b	c	a	b	e	f	c			a		a	a	a	e	a	f	f	a	c	b	a	c	g		a	c	a	c	b	b	b	c	d	b	c	5	5	3	5	5
		2	a	d	g	b	b	c	e	e	a	e	c	d	e	c	10	c		c	c	c	e	c	f	f	a	e1	c	c	c	e	a	c	d	a	d	d	b	c	c	d	d	d	5	5	5	5	5
		2	b	a	a	a	a	a	a	a	b	a	a	a	g			a	a	c	c	c	e	c	f	f	c			c	c	g	a	a	a	a	a	a	b	b	b	c	c	d	5	5	5	5	4
		2	b	a	a	a	a	a	a	a	b	a	a	a	g			a	e	a	c	c	e	c	f	f	c			c	c	g		a	a	b	a	a	b	b	c	c	b	c	5	5	5	5	5
		2	b	a	a	a	a	a	a	a	b	a	a	a	g			a	e	c	c	c	e	c	f	f	c			a	c	a	c	a	c	a	b	a	b	b	c	c	a	a	3	3	3	3	3
		2	a	e	g	e	d	c,g	c	b	a	a	d	c	d			b		b	b	c	b	a	a	a	c			b	a	a	a	d	c	b	a	a	b	a	c	a	c	c	1	2	3	4	5
		2	a	e	a	a	a	a	a	a	a	a	a	a	e	b	4	a	c	c	a	c	b	b	f	a	a	a	c	c	b	f		a	b	a	c	c	c	b	c	d	b	c	5	4	4	4	5
		2	a	e	a	a	a	a	a	a	a	b	a	a	e	b	7	a	d	c	a	a	e	c	f	a	c			c	c	g	a	a	a	a	a	b	c	c	c	d	b	c	5	4	3	5	5
		2	a	g	a	a	a	a	a	a	a	a	a	a	e	c		a	d	a	a	b	a	c	a	a	a	b	a	c	c	g	a	b	b	a	a	c	b	b	b	d	b	c	4	4	4	4	4
		2	a	f	f	e	b	c	e	d	b	a	g1	g2	e	b		c		b	a	a	a	a	a	a	b			a	a	g		d	d	a	c	d	c	c	c	c	c	c	4	5	5	5	5
		2	a	g	b	b	d	b	g	d	b	a	e	f	g			a	a	c	c	c	e	c	f	f	c			c	c	g		c	b	a	a	a	c	c	c	d	a	c	4	4	3	3	4
		2	a	f	f	e	b	e	e	d	a	b	c	d	e	b		c		a	a	a	b	a	a	a	a	a,b,c	a	a	c	e	b	c	c	a	c	c	b	b	c	d	b	c	4	5	3	4	4
		2	a	f	g	d	b	h1	e	d	a	g	c	d	e	b		c		a	a	a	b	a	a	a	a	a,b,c	a	a	a	e	b	b	c	a	c	c	b	b	c	d	c	c	4	5	3	2	4
		2	b	a	a	a	a	a	a	a	b	b	a	a	f			a	e	a	c	a	c	a	d	a	a	d	b	b	a	d	a	c	c	b	c	b	b	c	a	b	d	a	4	4	2	3	2
		2	a	g	f	c	d	b	g	d	a	g	e	e	g			b		c	a	a	a	a	a	a	a	a,b,d	b	b	b	f		c	c	a	c	c	c	b	c	d	c	d	3	4	3	3	3
		2	a	f	g	e	b	e	e	d	a	e	c	d	b			c		a	a	a	e	b	a	f	c			c	c	f	b	b	a	a	b	a	c	c	c	c	b	c	4	4	2	3	3
		2	a	g	a	a	a	a	a	a	b	a	a	a	g			a	a	a	c	c	b	c	f	f	c			c	c	g	d	c	d	b	d	d	c	c	c	d	d	d	4	4	1	2	4
		2	a	b	a	a	a	a	a	a	b	a	a	a	g			a	d	a	c	c	b	b	f	b	a	a,c	b	b	b	g	a	a	a	a	a	a	b	b	c	d	c	d	5	5	5	5	5
		2	a	f	e	f	e	d	b	d	b	b	b	f	e	a		b		a	a	a	b	c	f	d	a	b,c,d	a	a	c	d	a	a	b	a	b	b	b	b	b	d	a	c	5	4	3	4	5
		2	b	a	a	a	a	a	a	a	b	a	a	a	g			a	e	a	a	a	b	a	f	f	c			c	b	g		c	b	a	a	a	b	b	b	c	b	c	4	4	2	4	5
		2	a	f	a	a	a	a	a	a	b	a	a	a	g			a	e	c	c	c	e	a	f	f	c			c	c	g		a	a	a	a	a	b	b	c	d	a	d	5	5	3	5	5
		2	a	g	a	a	a	a	a	a	a	a	a	a	g			a	e	c	c	c	e	c	a	f	c			c	c	e	a	c	a	a	a	a	c	b	c	d	b	d	5	4	3	4	5
		1	a	g	a	a	a	a	a	a	b	a	a	a	g			a	a	a	c	c	b	c	f	f	c			c	c	g	d	c	d	b	d	d	c	c	c	d	d	d	4	4	1	2	4
		1	a	f	e	f	e	d	b	d	b	b	b	f	e	a		b		a	a	a	b	c	f	d	a	b,c,d	a	a	c	d	a	a	b	a	b	b	b	b	b	d	a	c	5	4	3	4	5
		1	a	f	a	a	a	a	a	a	b	a	a	a	g			a	e	c	c	c	e	a	f	f	c			c	c	g		a	a	a	a	a	b	b	c	d	a	d	5	5	3	5	5
		1	a	g	a	a	a	a	a	a	a	a	a	a	g			a	e	c	c	c	e	c	a	f	c			c	c	e	a	c	a	a	a	a	c	b	c	d	b	d	5	4	3	4	5
		1	a	g	c	c	b	c	e	d	a	a	e	f	g			a		c	c	c	e	c	a	f	c			c	b	e	a	a	a	a	d	a	c	b	c	d	c	d	4	4	4	4	4
		1	a	f	f	d	b	b	d	d	b	a	c	d	e	c	2	b		c	c	c	e	a	a	a	a	c	c	c	c	g		c	c	a	d	d	c	b	b	d	b	c	4	3	3	4	4
		1	a	g	e	d	b	e	e	d	a	d	d	d	d			b		a	c	a	b	c	f	f	c			c	c	f		a	c	a	c	b	c	b	c	c	b	c	3	4	3	4	4
		1	a	g	a	a	a	a	a	a	a	a	a	a	g			a	c	c	c	a	b	b	a	a	b			b	c	g	a	a	a	b	b	b	c	c	c	d	c	d	5	4	3	5	5
		1	a	g	d	d	d	c	c	d	a	e	c	d	g			c		b	b	a	d	a	a	f	b			b	b	d	a	a	d	a	c	c	b	b	b	c	c	d	1	1	5	3	3
		1	a	g	d	e	b	b	d	c	a	a	e	f	d			b		b	b	b	d	b	c	e	a	a	a	b	b	d	a	a	d	a	c	c	b	b	b	c	c	c	4	4	2	4	4
		1	a	g	a	a	a	a	a	a	a	d	a	a	e	c	5	a	b	a	c	c	b	c	b	a	a	a,b,c	c	c	b	f		a	a	a	b	b	b	b	b	d	b	c	5	4	3	4	5
		1	b	a	a	a	a	a	a	a	b	a	a	a	g			a	d	c	c	c	e	a	f	f	c			c	c	g	a	d	a	b	a	a	c	b	c	d	b	c	2	4	3	4	4
		1	b	a	a	a	a	a	a	a	b	a	a	a	e	c	2	a	a	c	a	c	e	c	f	e	c			a	c	g		a	a	a	a	a	c	c	b	d	a	c	5	4	3	2	5
		1	b	a	a	a	a	a	a	a	b	a	a	a	g			a	c	b	b	a	a	a	b	f	c			c	c	g		a	a	b	a	a	b	b	c	c	c	c	5	3	3	3	3
		1	b	a	a	a	a	a	a	a	b	a	a	a	e	b		a	d	a	c	a	b	a	f	a	a	a	b	c	c	g		c	a	a	a	a	b	b	a	a	a	c	5	4	3	5	5
		1	a	e	g	g	b	b	e	d	a	b	c	d	b5			c		c	c	c	e	a	a	a	c			c	b	g		a	c	a	d	d	c	b	c	d	c	d	5	4	2	3	4
		1	b	a	a	a	a	a	a	a	b	a	a	a	c			a	e	a	a	a	a	a	f	f	c			c	c	g		a	a	a	a	a	c	c	c	d	b	c	1	1	3	3	5
		1	a	f	g	e	b	c	e	d	a	b	e	f	e	c	10	b		a	a	c	b	a	e	d	a	a	a	a	a	e	a	a	c	a	c	c	b	b	b	d	b	d	5	4	4	3	5
		1	b	a	a	a	a	a	a	a	b	a	a	a	g			a	e	c	a	a	a	a	f	f	c			b	c	a	a	b	b	b	b	b	b	b	c	d	b	d	3	3	3	3	3
		1	a	e	g	e	b	e	e	d	a	b	f	d	d			c		a	a	a	b	b	a	f	a	a	a	b	b	g	b	b	d	a	d	d	a	b	c	d	d	a	5	1	5	1	5
		1	b	a	a	a	a	a	a	a	b	a	a	a	a			a	e	c	c	c	e	c	f	f	c			c	c	g		d	a	a	a	a	b	b	b	d	b	c	2	3	2	3	2
		1	b	a	a	a	a	a	a	a	b	a	a	a	e	c		a	e	a	a	a	b	a	f	f	a	b	a	c	a	e	a	a	a	a	a	a	c	b	b	d	a	c	5	5	3	4	5
		1	b	a	a	a	a	a	a	a	b	a	a	a	g			a	e	c	c	c	e	c	f	f	c			c	c	g	a	a	a	b	a	a	b	b	b	d	a	d	5	5	5	5	5
		1	a	b	a	a	a	a	a	a	a	d	a	a	c			a	e	a	a	a	b	a	a	a	a	b	a	b	a	d	a	a	a	a	a	c	b	b	c	d	b	d	5	4	2	3	4
		1	a	g	a	a	a	a	a	a	a	a	a	a	e	c		a	d	a	a	a	b	c	a	a	a	b	a	c	c	g	a	d	b	b	a	b	b	b	b	d	b	d	5	5	4	4	5
		1	b	a	a	a	a	a	a	a	b	a	a	a	e	c	5	a	e	c	c	c	e	c	e	f	c			c	c	e	a	a	a	b	a	a	c	b	a	d	a	d	5	4	3	4	4
		1	a	g	a	a	a	a	a	a	a	a	a	a	b4			a	b	a	a	a	a	c	f	a	a	c	a	a	a	g		a	a	a	a	b	b	b	b	d	c	d	5	5	4	4	4
		1	a	g	a	a	a	a	a	a	a	a	a	a	g			a	d	c	c	c	e	b	f	a	a	a	a	c	a	d	a	a	b	b	b	b	c	c	c	d	b	c	5	4	4	4	4
		1	b	a	a	a	a	a	a	a	a	b	a	a	e	a	2	a	e	a	a	a	b	a	d	f	a	a	b	a	a	e	a	a	b	a	a	b	a	b	b	d	b	c	5	1	3	4	5
		1	a	e	g	d	b	g	e	e	a	c	f	g3	e	b		c		a	a	a	e	a	a	a	a	a,b	c	c	c	f		c	d	b	d	d	b	b	b	d	d	a	5	5	3	5	5
		1	b	a	a	a	a	a	a	a	a	e	a	a	g			a	b	c	c	c	e	c	f	b	c			c	c	d	a	c	b	b	c	c	b	b	a	d	b	a	4	4	4	4	5
		1	a	d	f	e	b	g	e	e	a	e	f	g3	e	b		b		c	c	c	b	c	b	c	a	b	b	c	c	g		c	c	a	d	d	c	c	c	c	c	c	4	4	3	4	4
		1	b	a	a	a	a	a	a	a	b	a	a	a	e	c		a	c	a	a	a	b	a	f	c	a	a,b,c,d,e	c	c	c	g		a	a	a	a	a	b	b	b	d	b	d	5	5	3	4	5
		1	a	f	a	a	a	a	a	a	a	c	a	a	e	a	2	a	e	a	a	a	b	a	f	a	c			a	c	g		a	a	a	a	a	b	b	c	d	a	a	5	5	5	5	5
		1	b	a	a	a	a	a	a	a	a	a	a	a	e	b	10	a	a	c	c	c	b	a	a	a	b			b	c	a	a	a	a	a	a	a	b	b	c	d	a	c	5	5	3	4	5
		1	a	g	f	e	b	e	e	d	a	c	c	d	e	b	10	c		a	a	a	a	b	a	a	c			b	b	d	a	c	c	a	d	c	c	c	b	d	b	d	1	2	3	4	5
		1	a	g	a	a	a	a	a	a	a	a	a	a	e	b	10	a	b	a	c	c	c	c	f	f	c			c	c	g		b	b	a	a	b	b	b	c	c	b	c	5	4	4	5	5
		1	a	g	a	a	a	a	a	a	a	a	a	a	e	c		a	d	c	c	a	b	c	f	b	a	a	a	a	c	g		d	a	a	b	b	b	b	c	d	c	d	5	4	4	4	5
		1	a	g	g	e	b	h5	e	d	a	b	c	d	e	b	4	c		a	a	a	a	a	a	a	a	b	b	c	a	e	b	b	c	a	c	c	c	c	b	d	c	c	2	2	3	3	3
		1	a	f	g	e	b	h11	e	c	b	a	e	e	e	c		c		c	a	a	a	a	a	a	c			c	a	g		d	d	a	d	d	c	b	b	a	b	a	3	3	3	3	3
		1	a	g	a	a	a	a	a	a	b	a	a	a	e	c		a	e	c	c	c	e	c	f	f	c			c	c	g		c	a	a	a	a	c	c	c	a	b	c	4	3	3	4	4
		1	a	c	g	c	c	e	c	e	a	c	c	d	d			e		c	c	c	e	c	f	f	a	b	b	c	c	c	a	b	d	a	d	d	c	c	c	d	d	c	5	4	3	4	5
		1	a	d	b	b	b	c	b	e	a	a	c	d	d			b	b	c	c	c	c	c	f	f	c			c	c	c	a	c	c	a	c	c	c	c	c	c	c	d	5	5	3	4	5
		1	b	a	a	a	a	a	a	a	b	a	a	a	c			a	e	c	c	c	e	c	f	e	c			c	c	g		a	a	a	b	b	c	c	c	d	b	c	4	3	3	3	4
		1	a	e	a	a	a	a	a	a	a	f	a	a	e	b		a	b	a	a	a	e	a	a	f	c			a	a	g		a	a	a	b	b	b	b	b	d	b	d	5	5	2	5	5
		1	a	g	a	a	a	a	a	a	b	f	a	a	e	b		a	a	b	b	b	d	b	e	f	b			b	b	e	a	c	d	a	b	b	c	b	a	a	b	b	5	5	5	5	3
		1	a	f	f	e	b	h1	e	e	a	b	b,c,d,e,e	d	a			c		b	a	a	b	b	c	c	a	c	b	b	b	e	c	c	c	b	a	d	c	a	b	b	c	c	1	2	3	4	5
		1	a	d	g	d	b	b	e	e	a	g	g1	f	d			e		a	c	b	b	a	f	f	c			c	c	g		c	b	a	b	b	c	c	c	b	b	c	4	1	1	4	4
		1	a	b	a	a	a	a	a	a	a	d	a	a	d			a	c	a	c	b	a,b	a	b	a	a	d	a	c	b	d	b	b	d	a	d	c	b	b	a	d	b	b	5	3	4	2	4
		1	a	f	a	a	a	a	a	a	a	a	a	a	e	b		a	c	c	c	c	e	c	f	a	c			c	c	a		a	b	a	b	b	c	b	c	d	b	d	5	5	3	3	4
		1	a	c	b	b	f	h5	g	b	a	d	c	e	e	c		b	a	c	c	a	b	b	b	a	c			c	b	g		b	c	a	c	c	c	c	c	d	c	c	4	2	2	4	4
		1	a	e	a	a	a	a	a	a	a	d	a	a	e	b		a	d	a	a	a	b	b	f	a	a	a	c	b	b	g	c	a	a	a	a	a	b	b	b	c	b	c	5	5	5	5	5
		1	a	c	b	b	d	c	g	b	a	a	e	f	d			a	b	a	c	c	d	a	a	a	c			a	b	g		a	c	a	b	c	c	c	c	d	c	c	4	4	3	2	4
		1	b	a	a	a	a	a	a	a	a	d	a	a	e	a	2	a	d	a	a	a	b	b	b	a	c			a	c	a		a	a	a	a	b	b	b	c	d	b	c	4	3	3	3	5
		1	a	f	a	a	a	a	a	a	a	b	a	a	e	c		a	d	a	a	a	b	b	e	a	c			a	b	e	b	c	b	a	b	c	c	b	b	d	b	c	5	4	4	4	5
		1	a	e	g	e	b	h6	e	e	a	b	f	d	e	b		b		a	a	c	e	b	f	a	a	b	a	a	c	g	c	c	a	a	d	b	b	b	c	c	c	d	5	5	5	5	5
		1	a	g	a	a	a	a	a	a	a	a	a	a	e	b		a	d	c	a	c	b	c	e	a	b			a	c	g		a	b	a	b	c	c	b	c	d	b	c	5	5	5	5	5
		1	b	a	a	a	a	a	a	a	b	a	a	a	e	b		a	b	a	c	a	e	b	f	a	b			a	b	g		d	b	a	b	c	c	b	b	c	b	c	4	4	3	4	4
		1	a	f	a	a	a	a	a	a	a	d	a	a	g			a	b	a	a	a	e	b	a	a	c			c	c	g		c	c	b	c	c	c	b	c	d	b	d	4	4	4	4	5
		1	a	f	a	a	a	a	a	a	a	c	a	a	e	b		a	d	c	a	c	e	a	f	b	a	a,b,c,d	a	a	c	g		a	b	a	b	b	b	b	c	d	b	d	5	5	4	5	5
		1	a	f	g	f	b	e	e	c	a	b	b	f	g			c		a	a	a	e	c	a	f	c			c	c	e	a	c	d	a	d	d	c	c	c	c	d	c	4	3	3	3	3
		1	b	a	a	a	a	a	a	a	b	a	a	a	a			a	e	c	c	c	e	c	f	f	c			c	c	g		a	a	a	a	a	c	b	b	c	d	d	3	3	3	3	3
		1	b	a	a	a	a	a	a	a	b	a	a	a	e	a	2	a	e	a	a	a	b	a	e	f	a	b	a	a	a	e	a	a	a	a	a	a	c	b	b	d	a	d	5	5	3	5	5
		1	a	b	g	f	b	h7	e	c	a	g	g1	g4	g			c		c	c	c	e	c	f	f	c			c	a	g	a	a	d	a	d	d	b	b	b	d	d	d	5	5	1	3	5
		1	a	d	g	g	g	h4	e	c	a	b	c	d	b4			c		a	a	b	e	c	f	a	c			b	a	g		b	d	a	d	d	c	b	c	b	c	b	3	2	3	1	4
		1	a	d	c	b	b	c,g,h4	e	e	a	g	g1	d,e	b4			b		c	c	c	e	b	a	a	b			b	b	g	a	a	d	a	d	d	c	c	c	a	d	a	1	1	1	1	1
		1	a	g	c	b	g	c	d	d	b	a	g	f	e	b		b		a	a	a	b	a	a	a	c			b	c	d	b	c	c	a	c	c	b	b	a	d	c	b	5	4	5	4	4
		1	a	e	g	b	b	b	e	e	a	b	g1	g4	e	b		c		a	a	a	b	a	e	a	a	d	a	a	a	e	b	c	d	b	d	d	a	b	c	d	c	d	5	4	3	3	5
		1	a	f	a	a	a	a	a	a	a	a	a	a	g			a	d	a	a	a	b	a	e	b	a	a	b	c	a	e	b	c	d	a	c	b	c	a	b	a	b	c	1	2	2	3	3
		1	b	a	a	a	a	a	a	a	b	a	a	a	e	a		a	b	a	a	a	b	b	e	a	a	b	c	a	c	g	a	a	a	a	b	b	c	b	a	d	b	d	5	2	4	5	5
		1	a	e	g	e	h	e	e	d	a	g	f	d	e	b		c		a	a	a	b	b	a	a	a	a	a	a	b	e	b	b	d	a	d	d	c	b	c	d	d	a	5	4	5	5	5
		1	a	b	a	a	a	a	a	a	a	a	a	a	g			a	e	c	c	c	a	c	f	f	c			c	c	g	a	c	a	a	a	a	c	b	c	d	b	d	4	4	2	3	3
		1	a	g	a	a	a	a	a	a	a	d	a	a	e	c		a	e	c	c	a	b	c	a	f	a	b,c,d	a	a	a	a	b	a	b	b	b	c	c	b	b	d	b	d	4	4	3	4	4
		1	a	g	b	b	g	b	g	d	a	b	e	f	d			a	e	c	c	c	e	c	f	f	c			c	c	g	a	c	a	a	c	c	b	b	c	d	b	d	5	4	3	3	5
		1	a	d	f	e	g	b	e	c	a	d	b	f	e	c		b		c	c	c	b	c	b	f	a	a,b	b	c	c	g		b	d	a	d	d	c	c	c	d	c	c	4	4	3	4	4
		1	b	a	a	a	a	a	a	a	b	a	a	a	e	c		a	b	c	c	c	b	a	f	b	a	a,b,d	b	a	c	e	a	a	a	a	a	a	c	b	b	d	b	c	5	4	4	5	5
		1	a	g	b	c	b	e	c	d	a	d	e	d	d			b	b	c	a	a	e	a	a	d	a	b	a	a	b	c	a	a	a	a	c	c	b	b	c	b	b	d	5	4	3	3	3
		1	b	a	a	a	a	a	a	a	b	a	a	a	g			a	e	c	c	c	b	a	f	f	c			c	c	g		a	a	b	b	b	c	b	c	c	b	b	3	2	3	2	4
		1	b	a	a	a	a	a	a	a	b	a	a	a	g			a	e	a	a	a	a	a	f	f	c			b	c	c	a	a	b	b	b	c	a	b	b	d	b	c	5	4	3	3	5
		1	b	a	a	a	a	a	a	a	a	c	a	a	g			a	b	c	a	c	b	a	b	a	c			a	c	g		c	a	a	a	a	c	b	a	d	b	c	5	4	3	5	5
		1	a	e	e	d	d	c,e.g	e	e	a	d	c	f	g			b		c	c	c	e	c	f	f	c			c	c	g	b	c	b	a	c	b	c	b	b	c	c	c	1	2	2	5	4
		1	a	f	e	d	d	b	e	e	a	d	c	f	g			b		c	c	c	e	c	f	f	c			c	c	g	b	a	d	a	d	c	a	b	c	d	c	d	4	4	3	5	5
		1	a	e	g	g	g	e	e	e	a	d	c	d	e	a		c		b	a	a	e	b	b	d	a	a	c	b	b	f		d	d	b	d	c	c	b	c	c	d	d	4	4	2	3	3
		1	a	e	g	f	b	h4	e	c	b	a	f	d	f			c		a	c	c	e	b	b	a	c			c	c	f		d	d	a	d	d	c	c	b	c	c	b	2	2	3	2	4
		1	b	a	a	a	a	a	a	a	b	a	a	a	e	b		a	e	a	c	a	b	c	f	a	c			a	c	g		a	a	a	a	a	c	b	c	d	b	d	5	5	3	3	5
		1	a	e	g	e	b	h	e	c	a	a	b	g3	g			c		c	c	a	b	b	a	a	c			b	c	g		b	c	a	d	c	c	c	c	d	c	c	4	5	3	3	5
		1	a	g	g	d	b	g	e	e	a	b	b	g3	g			c		c	c	c	e	c	b	a	c			c	c	f	a	a	c	a	a	a	c	b	b	c	c	a	4	4	3	3	5
		1	a	g	e	b	b	b	b	c	a	b	e	f	c			a		a	a	a	e	a	f	f	a	c	c	a	c	g		a	c	a	c	b	b	b	c	d	b	c	5	5	3	5	5
		1	a	d	g	e	b	c	e	e	a	e	c	d	e	c	10	c		c	c	c	e	c	f	f	a	e1	c	c	c	e	a	c	d	a	d	d	c	c	c	d	d	d	5	5	5	5	5
		1	b	a	a	a	a	a	a	a	b	a	a	a	g			a	a	c	c	c	e	c	f	f	c			c	c	g	a	a	a	a	a	a	b	b	b	c	c	d	5	5	5	5	4
		4	a	g	g	f	c	g	e	e	b	a	b	d	b			c		c	c	c	e	a	f	f	c			c	c	g	b	d	d	a	d	d	c	c	b	d	a	a	3	3	3	3	3
		4	a	g	c	c	b	c	e	d	a	a	c	f	b1			b		a	c	c	e	a	f	f	c			a	a	d	a	a	c	a	a	a	c	c	c	d	c	d	5	5	5	5	5
		4	a	g	a	a	a	a	a	a	a	a	a	a	g			a	a	a	a	a	e	c	a	a	a	a,b,d	a	c	c	g		a	b	a	a	b	b	b	b	d	c	d	5	5	3	5	5
		4	a	g	b	c	c	c	d	e	a	b	c	f	b1			b	a	a	a	a	e	b	f	f	c			a	c	e	a	c	c	a	c	c	c	c	c	d	c	c	5	5	5	5	5
		4	a	f	c	c	b	c	c	e	a	b	e	d	d			b		c	c	b	c	c	f	f	c			c	c	g	a	a	c	a	c	c	c	c	c	d	b	c	4	3	3	3	3
		4	a	g	a	a	a	a	a	a	b	a	a	a	g			a	e	c	c	b	e	c	e	c	b			b	c	c	a	a	a	a	b	c	a	a	c	d	c	a	5	3	4	4	5
		4	a	e	e	d	b	c	e	e	a	c	f	d	b2			c		c	c	c	e	a	a	d	a	e	c	c	b	a		a	d	b	d	c	b	b	c	c	c	c	3	3	3	3	3
		4	a	e	a	a	a	a	a	a	a	b	a	a	g			a	e	a	a	a	a	a	c	f	a	c	c	a	c	g	d	b	b	a	b	b	c	b	b	d	b	c	5	4	3	5	5
		4	a	f	a	a	a	a	a	a	a	a	a	a	b1			a	e	c	a	a	b	b	d	d	a	a,d	b	b	b	f	a	a	d	a	b	c	b	b	b	d	b	d	5	4	3	3	4
		4	a	g	g	f	b	g	e	e	b	a	b	d	b2			c		c	c	c	e	a	f	f	c			c	c	g	b	d	d	a	d	d	c	c	b	c	d	a	3	3	3	3	3
		4	a	f	a	a	a	a	a	a	b	a	a	a	b			a	e	c	c	c	e	c	e	d	a	a,b	a	c	c	g		a	a	a	b	b	b	b	b	d	b	d	4	3	3	3	4
		4	a	d	a	a	a	a	a	a	a	a	a	a	e	a		a	c	a	a	c	e	a	f	d	a	a,b	a	c	c	g	a	a	b	a	c	c	b	b	b	d	b	d	5	5	3	5	5
		4	a	b	g	b	b	g	c	d	a	e	b	d	b			c		b	c	c	e	c	f	f	c			c	c	g		c	c	a	d	d	b	b	c	d	c	d	1	1	1	2	2
		4	a	e	a	a	a	a	a	a	a	b	a	a	g			a	e	a	a	a	a	a	c	f	a	a,b,c	a	c	a	g	d	c	b	a	b	b	c	b	b	d	b	c	5	4	3	5	5
		4	a	e	a	a	a	a	a	a	a	b	a	a	c			a	e	a	a	a	d	b	e	f	a	e	a	b	c	c	a	a	a	a	c	c	b	b	c	d	b	c	5	4	4	3	5
		4	a	e	a	a	a	a	a	a	a	b	a	a	c			a	e	a	a	a	d	b	e	f	a	b	a	b	c	c	a	a	a	a	c	c	b	b	c	d	b	c	5	4	4	3	5
		4	a	g	a	a	a	a	a	a	a	a	a	a	g			a	a	a	a	c	b	a	a	a	a	a,b,d	a	c	c	g		a	b	a	a	b	b	b	b	d	c	d	5	5	3	5	3
		4	a	d	a	a	a	a	a	a	b	a	a	a	c			a	e	a	a	a	d	b	e	f	a	a	a	b	a	c	a	a	a	b	a	a	c	c	b	d	b	c	4	4	3	4	4
		4	a	g	a	a	a	a	a	a	a	a	a	a	g			a	e	c	c	c	e	c	f	f	c			c	c	g		c	a	a	a	b	c	b	b	d	b	d	5	4	3	5	5
		4	a	d	c	d	b	g	e	c	b	a	c	d	e	b	2	b		b	a	b	d	a	a	a	a	a,b,c,d	b	b	a	e	a	a	d	b	d	d	a	b	b	c	d	a	5	5	5	5	5
		4	a	g	g	d	b	c	e	e	a	a	f	d	d			b		a	a	b	b	b	a	e	a	a	a	b	b	a	a	c	c	a	d	b	b	b	c	d	c	d	5	2	2	5	5
		4	a	g	e	d	b	b	e	d	a	b	b	f	c			a		c	c	c	e	a	f	f	c			c	c	g	a	b	c	a	c	c	c	c	c	c	b	c	5	5	5	3	5
		4	a	g	d	d	b	b	e	d	a	c	e	d	e	a		b		b	b	b	e	a	a	a	a	d	b	b	b	d	a	b	c	b	c	c	c	b	b	d	c	c	1	3	2	1	1
		4	a	g	a	a	a	a	a	a	a	a	a	a	e	a		a	e	c	c	c	e	a	d	f	a	a,c	c	a	c	e	b	a	b	a	b	b	b	b	b	d	c	c	5	4	3	3	5
		4	a	g	g	d	b	c	e	e	a	a	c	d	d			b		a	a	c	e	a	a	a	a	a	c	c	c	g	a	c	c	b	d	c	b	b	c	d	c	c	5	4	3	2	1
		4	b	a	a	a	a	a	a	a	a	a	a	a	g			a	e	c	c	c	e	c	f	f	c			c	c	g		a	a	b	a	a	c	c	c	c	c	c	3	3	3	2	4
		4	a	g	b	b	b	c	b	e	a	a	d	f	g			b	b	b	b	b	b	b	a	e	c			c	c	d	a	c	d	b	d	b	c	b	b	b	c	d	4	2	2	2	2
		4	a	g	c	d	b	c	e	e	b	a	e	f	e	c		b		a	a	a	e	a	f	a	a	a	c	c	c	e	a	a	a	a	c	c	b	b	c	d	b	c	5	4	3	4	5
		4	a	f	g	e	b	e	e	e	b	a	d	d	g			b		b	a	b	e	b	e	e	c			b	b	d	a	c	c	b	d	d	c	c	c	c	c	b	4	1	4	4	4
		4	a	g	a	a	a	a	a	a	a	a	a	a	e	c		a	e	c	c	c	e	a	f	a	c			c	c	g	a	a	a	b	b	b	c	b	c	c	c	c	1	2	3	4	5
		4	a	g	g	d	g	b	e	e	a	a	c	d	e	a		c		c	c	c	e	a	a	a	a	a	c	c	c	g	a	c	c	b	c	c	c	b	c	c	b	c	1	2	3	4	5
		4	a	g	g	g	g	e	e	d	b	a	b	d	g			c		c	c	c	e	a	f	f	c			c	c	c	b	b	d	a	d	d	c	c	b	c	d	c	3	4	3	3	3
		4	b	a	a	a	a	a	a	a	b	a	a	a	b3			a	e	c	a	b	b	b	e	d	a	a	b	b	b	f		a	a	a	b	b	c	c	c	d	b	c	5	4	3	3	4
		4	b	a	a	a	a	a	a	a	b	a	a	a	g			a	a	c	c	a	b	a	a	e	a	b,a	c	c	a	g		c	a	a	a	b	b	b	b	d	c	c	4	4	4	3	3
		4	a	e	a	a	a	a	a	a	b	a	a	a	g			a	e	a	c	c	e	c	f	e	c			c	b	g	b	a	a	b	a	a	c	c	c	d	b	a	4	5	4	5	4
		4	a	c	g	e	b	c	e	d	a	a	g1	g1	b1			c		c	c	c	d	a	f	e	c			b	a	g		c	d	a	d	d	a	b	b	b	c	a	4	4	4	4	4
		4	a	d	e	e	b	e	e	e	a	a	e	d	b			c		b	a	a	a	a	e	d	a	a	a	a	a	c	a	c	c	a	c	c	c	c	b	d	c	d	5	5	4	5	5
		4	a	e	g	e	b	c	e	e	a	g	g1	d	b1			c		b	a	a	a	a	e	d	a	a	a	a	a	c	a	c	c	a	c	c	c	c	c	d	c	d	3	4	4	4	4
		4	a	f	a	a	a	a	a	a	b	a	a	a	b3			a	e	c	c	c	e	c	f	d	c			c	c	g	b	a	a	b	a	a	b	b	b	d	b	c	4	4	4	4	4
		3	b	a	a	a	a	a	a	a	b	a	a	a	d			a	e	c	a	a	b	b	e	e	a	a	c	c	b	d	a	a	c	a	c	c	c	b	a	d	c	a	4	1	3	4	4
		3	a	f	a	a	a	a	a	a	b	a	a	a	g			a	e	a	c	c	b	a	f	e	c			a	c	g		c	b	a	c	c	c	c	a	d	b	c	5	5	3	5	5
		3	a	e	a	a	a	a	a	a	a	b	a	a	g			a	e	c	c	c	e	a	f	c	a	d	c	b	c	g	a	a	a	b	c	c	b	b	a	d	c	c	1	2	3	3	4
		3	b	a	a	a	a	a	a	a	b	a	a	a	g			a	d	a	a	c	a	a	a	f	a	a,b	a	a	c	g		a	a	a	b	b	c	b	c	c	b	b	4	4	4	4	4
		3	b	a	a	a	a	a	a	a	b	a	a	a	g			a	e	a	c	c	e	c	f	f	c			c	c	g	a	a	d	b	d	d	c	b	c	c	b	c	1	2	3	3	4
		3	b	a	a	a	a	a	a	a	b	a	a	a	g			a	a	a	a	a	b	c	e	f	a	d	c	a	a	g	a	a	a	a	a	a	b	b	b	d	b	c	5	4	5	5	5
		3	a	d	f	d	b	c	e	e	a	f	c	g1	b1			c		c	c	c	e	c	f	f	c			c	c	g		c	d	a	d	d	c	c	c	d	d	d	1	1	1	1	1
		3	a	e	a	a	a	a	a	a	a	a	a	a	c			a	d	b	b	b	d	a	d	a	a	a	a	a	a	d	b	a	c	a	d	d	b	b	c	d	c	c	5	2	5	5	5
		3	a	g	f	e	b	b	e	e	a	b	g1	g	e	c		b		c	c	c	d	a	f	d	a	a	a	c	c	g		c	c	a	d	d	c	c	b	d	d	a	5	5	5	5	5
		3	a	g	b	d	d	c	b	b	a	a	e	f	e	a		a	e	c	c	c	d	a	e	f	a	a	a	c	b	g		a	b	a	c	d	c	c	c	d	c	c	5	5	3	4	5
		3	a	g	g	e	b	c	e	e	a	a	c	d	b			c		a	a	c	e	a	a	f	a	a	a	c	a	d	a	d	d	a	d	c	c	c	c	d	c	c	4	4	3	3	4
		3	a	e	g	f	b	e	e	e	a	a	f	g1	b1			c		a	a	c	e	a	a	f	a	a	a	c	b	g		c	c	a	d	c	c	c	b	d	c	c	4	4	3	3	4
		3	a	e	a	a	a	a	a	a	b	a	a	a	c			a	e	b	b	a	a	b	e	e	a	b	a	b	b	b	b	c	d	b	c	b	c	b	b	c	c	b	1	1	5	1	1
		3	b	a	a	a	a	a	a	a	b	a	a	a	c			a	e	c	c	c	e	a	f	f	a	b	c	b	c	g		a	a	a	b	b	c	b	c	d	b	c	4	4	3	3	4
		3	a	e	a	a	a	a	a	a	b	a	a	a	g			a	e	c	c	c	e	a	f	f	a	a,d	c	c	c	e	a	a	a	a	a	a	c	b	b	d	c	c	5	5	3	4	5
		3	a	g	g	g	b	g	e	e	b	a	g1	d	b1			c		a	b	b	e	a	a	d	a	b	b	c	c	g	d	c	d	a	d	d	c	c	b	d	d	d	4	3	3	3	3
		3	a	g	g	f	g	c	e	e	a	b	c	d	e	a		b		a	a	a	b	a	a	f	a	a	a	a	b	g		c	c	a	c	c	c	b	c	d	c	c	4	4	3	5	3
		3	a	f	f	e	b	c	b	d	b	a	e	f	g			c		c	c	c	e	c	f	f	c			c	c	g	a	c	d	a	c	c	c	b	c	d	b	d	5	5	3	4	5
		3	a	f	g	e	b	e	c	d	a	a	c	g1	b1			c		c	c	c	e	b	c	d	a	a	a	a	b	f		b	d	a	d	d	c	c	c	c	c	a	2	2	4	2	4
		3	a	g	g	e	b	g	e	e	a	a	g1	g2	b1			c		a	a	a	b	a	e	f	a	a	a	a	a	b1	a	a	c	a	c	c	c	c	c	c	c	c	3	3	3	3	4
		3	a	f	a	a	a	a	a	a	b	a	a	a	e	c		a	e	a	a	b	b	a	b	a	a	d	b	a	c	e	c	c	d	a	b	a	c	b	b	c	b	b	5	5	5	5	5
		3	a	e	e	d	b	e	e	d	a	b	c	g2	g			b		c	c	c	e	c	f	f	c			c	c	g		c	d	a	c	c	c	c	c	c	a	d	4	4	4	4	4
		3	a	g	a	a	a	a	a	a	a	a	a	a	b1			a	b	a	a	c	b	a	f	d	a	a,b	c	a	a	e	b	c	a	a	b	b	c	c	b	d	d	d	5	5	3	5	5
		3	a	d	a	a	a	a	a	a	b	a	a	a	d			a	e	c	c	c	e	a	f	f	a	a	a	a	c	d	a	c	a	b	a	a	b	b	a	d	b	d	4	4	4	4	4
		3	a	g	f	d	b	c	d	d	a	a	e	d	b1			b		c	b	c	b	a	f	d	a	b	a	c	c	g		b	c	a	d	d	c	c	b	d	d	c	5	5	3	4	5
		3	a	e	a	a	a	a	a	a	b	a	a	a	e	a		a	e	a	a	a	b	a	f	f	a	a	c	c	c	g		a	a	b	a	b	c	b	b	d	b	d	5	5	4	5	5
		3	a	d	a	a	a	a	a	a	b	a	a	a	e	c	3	a	d	c	c	c	a	c	f	f	c			c	c	g	a	a	b	a	b	b	b	b	c	c	b	d	5	5	3	5	5
		3	b	a	a	a	a	a	a	a	b	a	a	a	c			a	e	a	c	c	e	c	f	f	c			c	b	g	a	a	a	b	a	a	c	c	c	d	b	d	5	4	3	4	5
		3	a	f	a	a	a	a	a	a	b	a	a	a	c			a	c	a	c	c	e	c	f	f	c			c	c	g		a	b	a	b	b	b	b	b	d	c	d	5	5	5	5	5
		3	a	d	a	a	a	a	a	a	b	a	a	a	e	a		a	e	c	c	c	e	a	f	f	c			c	c	g		a	a	b	a	a	b	b	b	d	b	d	5	5	3	3	5
		3	a	e	g	g	e	c	e	e	a	g	c	d	g			d		c	c	c	b	a	f	c	c			b	a	d	a	d	d	a	d	d	b	b	b	a	c	d	1	2	3	1	1
		2	b	a	a	a	a	a	a	a	b	a	a	a	e	c	3	a	d	a	a	c	b	a	f	f	a	c	c	c	c	g		d	a	a	a	a	b	b	b	d	a	d	5	5	4	4	5
		2	a	g	a	a	a	a	a	a	b	a	a	a	e	c	3	a	c	a	a	c	b	c	f	f	a	c	c	c	c	g		d	a	a	a	a	b	b	b	d	a	d	5	5	4	4	5
		2	b	a	a	a	a	a	a	a	b	a	a	a	b1			a	e	a	c	a	b	a	f	d	a	a	a	c	b	b	a	d	a	a	a	a	b	b	b	d	b	d	5	5	4	5	3
		2	b	a	a	a	a	a	a	a	b	a	a	a	b3			a	e	c	a	a	b	b	f	e	c			b	b	f		a	a	a	a	a	b	b	c	d	b	c	5	4	3	3	4
		2	a	g	a	a	a	a	a	a	a	a	a	a	d			a	e	a	a	a	a	a	e	e	a	a	a	a	c	g	a	a	a	b	a	a	c	b	a	d	b	d	5	5	3	5	5
		2	a	g	g	d	b	c	e	d	a	f	c	g1	d			c		c	c	c	e	c	f	f	c			c	c	g	a	d	c	a	c	b	b	b	c	a	c	d	1	1	1	1	1
		2	a	b	g	e	b	e	e	d	a	a	e	d	b			c		b	a	a	a	a	e	d	a	a	a	a	a	f		d	d	b	d	c	c	c	c	c	d	d	4	4	4	3	3
		2	a	f	a	a	a	a	a	a	b	a	a	a	a			a	d	b	b	b	d	b	f	f	b			b	b	c	a	a	d	b	d	d	c	b	c	d	b	c	4	4	3	4	4
		2	a	e	g	f	b	c	e	e	a	b	g1	g6	b1			c		a	a	c	e	a	d	d	a	a,c	b	c	c	g		d	d	a	d	c	b	b	b	d	c	c	5	5	5	5	5
		2	b	a	a	a	a	a	a	a	b	a	a	a	e	b		a	e	a	a	a	b	b	e	f	a	a	a	a	a	e	a	a	a	a	a	a	b	b	b	d	d	d	4	5	3	4	4
		2	a	b	g	f	b	b	e	e	a	a	f	d	g			c		c	c	c	c	c	f	f	c			c	b	e	c	a	d	a	d	d	c	c	a	d	d	a	3	4	2	5	5
		1	b	a	a	a	a	a	a	a	b	a	a	a	b1			a	d	c	a	c	e	c	f	b	c			c	c	a	b	c	a	a	a	a	b	b	b	a	c	a	5	4	4	4	5
		1	b	a	a	a	a	a	a	a	b	a	a	a	b1			a	e	a	a	c	e	a	e	f	a	a	c	a	c	g	a	d	a	b	a	a	c	b	b	d	b	c	5	5	5	4	4
		1	a	e	g	e	b	c,e	d	e	a	d	e	d	g			c		c	b	c	b	b	f	f	a	a	c	a	b	g		d	d	a	d	d	c	c	b	d	c	c	4	5	3	4	5
		1	b	a	a	a	a	a	a	a	b	a	a	a	g			a	a	c	c	c	e	c	f	f	a	e3	c	c	c	g		a	a	b	a	a	b	c	b	d	b	d	5	4	4	5	5
		1	a	e	g	f	d	c	d	e	b	a	c,d,f	d	c			b		c	c	c	c	a	f	f	c			b	c	g		b	d	a	d	d	c	c	b	d	c	d	5	4	5	4	4
		1	b	a	a	a	a	a	a	a	b	a	a	a	b1			a	b	c	c	c	e	c	f	b	c			a	c	b1	a	c	a	a	a	a	b	b	b	d	c	c	5	4	3	4	4
		1	b	a	a	a	a	a	a	a	b	a	a	a	g			a	a	a	a	a	b	a	f	f	a	a	a	c	c	d	a	a	d	b	c	d	b	b	b	d	c	d	5	4	4	4	4
		1	b	a	a	a	a	a	a	a	b	a	a	a	g			a	b	a	b	c	e	a	e	f	c			c	c	d	a	c	a	b	a	a	c	c	b	d	b	c	5	5	3	4	4
		4	a	e	g	e	b	b	d	c	a	a	c	g3	g			c		c	a	c	b	c	e	d	a	d	a	a	a	c	a	a	d	a	d	d	c	b	b	d	d	a	4	1	1	4	5
		4	a	b	g	g	e	c	e	e	a	g	c	d	g			d		c	c	c	b	a	f	c	c			b	a	d	a	d	d	a	d	d	b	c	b	a	c	d	1	2	3	1	1
		1	a	g	g	f	b	b	e	e	a	c	c	d	c			d		c	c	c	e	a	e	c	a	a,c	a	c	b	g		c	d	a	d	c	c	c	b	d	d	c	5	5	4	5	5
		1	a	g	a	a	a	a	a	a	a	b	a	a	b1			a	e	c	a	c	e	a	b	d	a	a	a	a	c	g		a	a	a	c	c	b	b	c	d	c	d	5	3	3	3	5
		1	b	a	a	a	a	a	a	a	b	a	a	a	e	b		a	e	c	c	c	e	b	f	f	a	b,a	c	c	c	e	a	a	a	a	a	a	b	b	b	d	c	d	5	5	5	3	5
		1	b	a	a	a	a	a	a	a	a	c	a	a	c			a	e	a	a	a	b,c	a	e	e	a	a,c	a	a	a	e	a	a	a	a	a	a	c	c	c	d	b	d	5	4	5	5	5
		1	b	a	a	a	a	a	a	a	a	b	a	a	e	c		a	e	a	a	a	c	a	e	e	a	a	a	a	b	e	a	a	a	a	a	a	c	c	c	d	b	d	5	1	5	5	5
		1	a	f	g	e	b	c	e	e	a	d	f	d	b1			b		b	b	c	e	c	f	f	c			a	a	c	b	a	d	a	c	d	c	c	c	d	b	c	3	4	2	5	4
		1	a	g	b	b	d	c	g	d	b	a	b	f	b1			a	e	c	c	c	e	c	d	c	c			c	c	g		b	b	b	a	b	b	b	c	b	b	b	3	3	3	3	3
		1	b	a	a	a	a	a	a	a	b	a	a	a	e	b	2	a	d	c	c	c	b	a	e	c	a	a,d	a	a	b	g	b	a	a	b	a	a	c	c	b	d	b	d	5	5	5	5	5
		1	a	g	a	a	a	a	a	a	a	c	a	a	e	a	2	a	e	a	a	a	d	a	f	f	a	a	b	c	a	b4	c	a	a	a	a	a	b	c	b	d	c	c	5	5	3	5	5
		1	a	d	f	d	c	b	d	b	a	b	c	d	e	a		c		a	a	c	b	a	e	e	a	a	a	a	c	e	a	b	d	a	d	d	c	b	c	d	a	d	5	3	3	3	3
		2	a	f	g	g	b	g	e	f	a	g	c	f	e	a	3	e		a	a	a	a	a	a	d	a	d	a	b	a	c	a	c	c	a	d	d	b	c	b	a	a	a	5	5	5	5	5
		2	b	a	a	a	a	a	a	a	a	b	a	a	c			a	a	a	a	b	a	a	a	f	a	a,b,c,d	a	a	a	g		c	a	a	a	a	c	c	b	c	c	c	3	3	3	3	3
		2	a	e	f	e	b	c,e,h8	e	e	a	f	c,f	d	g			c		c	c	c	b	b	a	a	c			b	c	g		d	d	b	d	d	c	c	b	c	c	c	4	4	4	4	4
		2	a	f	g	f	b	b	e	d	a	g	c,f	g5	e	a		d		a	a	b	b	b	d	d	a	a	a	b	c	a		b	c	a	d	d	c	c	c	c	d	b	5	5	5	5	5
		2	a	e	a	a	a	a	a	a	b	d	a	a	c			a	b	a	c	a	b	a	b	b	a	b	b	b	b	a		a	a	b	b	d	b	a	a	a	a	a	1	2	3	4	5
		2	a	e	a	a	a	a	a	a	a	a	a	a	d			a	e	b	a	a	e	c	f	f	a	a	b	b	a	g		c	a	b	c	c	b	b	a	d	a	d	5	5	5	5	5
		2	b	a	a	a	a	a	a	a	a	a	a	a	e	a		a	e	c	c	c	e	c	f	f	c			a	c	g		b	b	a	b	c	b	b	c	d	b	c	4	3	5	5	5
		2	a	b	a	a	a	a	a	a	a	g	a	a	d			a	b	a	a	c	a	a	f	f	a	a	a	a	c	a		a	a	a	c	d	c	c	c	d	c	d	5	5	4	5	5
		2	a	e	g	e	b	c,g	e	e	a	f	e	d,e	g			c		c	c	c	a,b	a	f	f	c			c	c	e	a	d	d	a	d	c	c	c	c	c	c	a	2	2	2	3	3
		2	a	e	a	a	a	a	a	a	b	a	a	a	e	a		a	a	a	a	a	a	a	b	a	a	b	a	a	a	e	a	a	a	a	a	c	c	b	b	d	c	d	5	4	5	5	5
		2	a	e	a	a	a	a	a	a	b	a	a	a	e	b		a	a	a	a	a	b	a	b	a	a	a	c	a	a	e	a	a	a	a	a	a	c	b	c	d	b	d	5	5	4	5	5
		2	a	e	g	b	b	c	e	e	a	g	g1	d	b1			c		b	a	a	a	a	e	d	a	a	a	a	a	c	a	c	c	a	c	c	c	c	c	d	c	d	3	4	4	4	4
		2	a	f	a	a	a	a	a	a	b	a	a	a	b3			a	e	c	c	c	e	c	f	d	c			c	c	g	b	a	a	b	a	a	b	b	b	d	b	c	4	4	4	4	4
		2	b	a	a	a	a	a	a	a	b	a	a	a	d			a	e	c	a	a	b	b	e	e	a	a	c	c	b	d	a	a	c	a	c	c	c	b	a	d	c	a	4	1	3	4	4
		2	a	f	a	a	a	a	a	a	b	a	a	a	g			a	e	a	c	c	b	a	f	e	c			a	c	g		c	b	a	c	c	c	c	a	d	b	c	5	5	3	5	5
		2	a	e	a	a	a	a	a	a	a	b	a	a	g			a	e	c	c	c	e	a	f	c	a	d	c	b	c	g	a	a	a	b	c	c	b	b	a	d	c	c	1	2	3	3	4
		2	b	a	a	a	a	a	a	a	b	a	a	a	g			a	d	a	a	c	a	a	a	f	a	a,b	a	a	c	g		a	a	a	b	b	c	b	c	c	b	b	4	4	4	4	4
		2	b	a	a	a	a	a	a	a	b	a	a	a	g			a	e	a	c	c	e	c	f	f	c			c	c	g	a	a	d	b	d	d	c	b	c	c	b	c	1	2	3	3	4
		2	b	a	a	a	a	a	a	a	b	a	a	a	g			a	a	a	a	a	b	c	e	f	a	d	c	a	a	g	a	a	a	a	a	a	b	b	b	d	b	c	5	4	5	5	5
		2	a	d	f	d	b	c	e	e	a	f	c	g1	b1			c		c	c	c	e	c	f	f	c			c	c	g		c	d	a	d	d	c	c	c	d	d	d	1	1	1	1	1
		2	a	e	a	a	a	a	a	a	a	a	a	a	c			a	d	b	b	b	d	a	d	a	a	a	a	a	a	d	b	a	c	a	d	d	b	b	c	d	c	c	5	2	5	5	5
		2	a	g	f	e	b	b	e	e	a	b	g1	g	e	c		b		c	c	c	d	a	f	d	a	a	a	c	c	g		c	c	a	d	d	c	c	b	d	d	a	5	5	5	5	5
		2	a	g	b	d	d	c	b	b	a	a	e	f	e	a		a	e	c	c	c	d	a	e	f	a	a	a	c	b	g		a	b	a	c	d	c	c	c	d	c	c	5	5	3	4	5
		2	a	g	g	e	b	c	e	e	a	a	c	d	b			c		a	a	c	e	a	a	f	a	a	a	c	a	d	a	d	d	a	d	c	c	c	c	d	c	c	4	4	3	3	4
		2	a	e	g	f	b	e	e	e	a	a	f	g1	b1			c		a	a	c	e	a	a	f	a	a	a	c	b	g		c	c	a	d	c	c	c	b	d	c	c	4	4	3	3	4
		2	a	e	a	a	a	a	a	a	b	a	a	a	c			a	e	b	b	a	a	b	e	e	a	b	a	b	b	b	b	c	d	b	c	b	c	c	b	c	c	b	1	1	5	1	1
		2	b	a	a	a	a	a	a	a	b	a	a	a	c			a	e	c	c	c	e	a	f	f	a	b	c	b	c	g		a	a	a	b	b	c	b	c	d	b	c	4	4	3	3	4
		2	a	e	a	a	a	a	a	a	b	a	a	a	g			a	e	c	c	c	e	a	f	f	a	a,d	c	c	c	e	a	a	a	a	a	a	c	b	b	d	c	c	5	5	3	4	5
		2	a	g	g	g	b	g	e	e	b	a	g1	d	b1			c		a	b	b	e	a	a	d	a	b	b	c	c	g	d	c	d	a	d	d	c	c	b	d	d	d	4	3	3	3	3
		2	a	g	g	f	g	c	e	e	a	b	c	d	e	a		b		a	a	a	b	a	a	f	a	a	a	a	b	g		c	c	a	c	c	c	b	c	d	c	c	4	4	3	5	3
		2	a	f	f	e	b	c	b	d	b	a	e	f	g			c		c	c	c	e	c	f	f	c			c	c	g	a	c	d	a	c	c	c	b	c	d	b	d	5	5	3	4	5
		2	a	f	g	e	b	e	c	d	a	a	c	g1	b1			c		c	c	c	e	b	c	d	a	a	a	a	b	f		b	d	a	d	d	c	c	c	c	c	a	2	2	4	2	4
		2	a	g	g	e	b	g	e	e	a	a	g1	g2	b1			c		a	a	a	b	a	e	f	a	a	a	a	a	b1	a	a	c	a	c	c	c	c	c	c	c	c	3	3	3	3	4
		2	a	f	a	a	a	a	a	a	b	a	a	a	e	c		a	e	a	a	b	b	a	b	a	a	d	b	a	c	e	c	c	d	a	b	a	c	b	b	c	b	b	5	5	5	5	5
		2	a	e	e	d	b	e	e	d	a	b	c	g2	g			b		c	c	c	e	c	f	f	c			c	c	g		c	d	a	c	c	c	c	c	c	a	d	4	4	4	4	4
		2	a	g	a	a	a	a	a	a	a	a	a	a	b1			a	b	a	a	c	b	a	f	d	a	a,b	c	a	a	e	b	c	a	a	b	b	c	c	b	d	d	d	5	5	3	5	5
		2	a	d	a	a	a	a	a	a	b	a	a	a	d			a	e	c	c	c	e	a	f	f	a	a	a	a	c	d	a	c	a	b	a	a	b	c	a	d	b	d	4	4	4	4	4
		2	a	f	g	b	b	c	e	e	a	d	f	d	b1			b		b	b	c	e	c	f	f	c			a	a	c	b	a	d	a	c	d	c	c	c	d	b	c	3	4	2	5	4
		2	a	g	b	b	d	c	g	d	b	a	b	f	b1			a	e	c	c	c	e	c	d	c	c			c	c	g		b	b	b	a	b	b	b	c	b	b	b	3	3	3	3	3
		2	b	a	a	a	a	a	a	a	b	a	a	a	e	b	2	a	d	c	c	c	b	a	e	c	a	a,d	a	a	b	g	b	a	a	b	a	a	c	c	b	d	b	d	5	5	5	5	5
		2	a	g	a	a	a	a	a	a	a	c	a	a	e	a	2	a	e	a	a	a	d	a	f	f	a	a	b	c	a	b4	c	a	a	a	a	a	b	c	b	d	c	c	5	5	3	5	5
		1	a	d	a	a	a	a	a	a	a	a	a	a	e	a		a	c	a	a	c	e	a	f	d	a	a,b	a	c	c	g	a	a	b	a	c	c	b	b	b	d	b	d	5	5	3	5	5
		1	a	b	g	d	b	g	c	d	a	e	b	d	b			c		b	c	c	e	c	f	f	c			c	c	g		c	c	a	d	d	b	b	c	d	c	d	1	1	1	2	2
		1	a	e	a	a	a	a	a	a	a	b	a	a	g			a	e	a	a	a	a	a	c	f	a	a,b,c	a	c	a	g	d	c	b	a	b	b	c	b	b	d	b	c	5	4	3	5	5
		1	a	e	a	a	a	a	a	a	a	b	a	a	c			a	e	a	a	a	d	b	e	f	a	e	a	b	c	c	a	a	a	a	c	c	b	b	c	d	b	c	5	4	4	3	5
		1	a	e	a	a	a	a	a	a	a	b	a	a	c			a	e	a	a	a	d	b	e	f	a	b	a	b	c	c	a	a	a	a	c	c	b	b	c	d	b	c	5	4	4	3	5
		1	a	g	a	a	a	a	a	a	a	a	a	a	g			a	a	a	a	c	c	a	a	a	a	a,b,d	a	c	c	g		a	b	a	a	b	b	b	b	d	c	d	5	5	3	5	3
		1	a	d	a	a	a	a	a	a	b	a	a	a	c			a	e	a	a	a	d	b	e	f	a	a	a	b	a	c	a	a	a	b	a	a	c	c	b	d	b	c	4	4	3	4	4
		1	a	g	a	a	a	a	a	a	a	a	a	a	g			a	e	c	c	c	e	c	f	f	c			c	c	g		c	a	a	a	b	c	b	b	d	b	d	5	4	3	5	5
		1	a	d	c	d	b	g	e	c	b	a	c	d	e	b	2	b		b	a	b	d	a	a	a	a	a,b,c,d	b	b	a	e	a	a	d	b	d	d	a	b	b	c	d	a	5	5	5	5	5
		1	a	g	g	d	b	c	e	e	a	a	f	d	d			b		a	a	b	b	b	a	e	a	a	a	b	b	a	a	c	c	a	d	b	b	b	c	d	c	d	5	2	2	5	5
		1	a	g	e	d	b	b	e	d	a	b	b	f	c			a		c	c	c	e	a	f	f	c			c	c	g	a	b	c	a	c	c	c	c	c	c	b	c	5	5	5	3	5
		1	a	g	d	d	b	b	e	d	a	c	e	d	e	a		b		b	b	b	e	a	a	a	a	d	b	b	b	d	a	b	c	b	c	c	c	b	b	d	c	c	1	3	2	1	1
		1	a	g	a	a	a	a	a	a	a	a	a	a	e	a		a	e	c	c	c	e	a	d	f	a	a,c	c	a	c	e	b	a	b	a	b	b	b	b	b	d	c	c	5	4	3	3	5
		1	a	g	g	d	b	c	e	e	a	a	c	d	d			b		a	a	c	e	a	a	a	a	a	c	c	c	g	a	c	c	b	d	c	b	b	c	d	c	c	5	4	3	2	1
		1	b	a	a	a	a	a	a	a	a	a	a	a	g			a	e	c	c	c	e	c	f	f	c			c	c	g		a	a	b	a	a	c	c	c	c	c	c	3	3	3	2	4
		1	a	g	b	b	b	c	b	e	a	a	d	f	g			b	b	b	b	b	c	b	a	e	c			c	c	d	a	c	d	b	d	b	c	c	b	b	c	d	4	2	2	2	2
		1	a	g	c	d	b	c	e	e	b	a	e	f	e	b		b		a	a	a	e	a	f	a	a	a	c	c	c	e	a	a	a	a	c	c	b	b	c	d	b	c	5	4	3	4	5
		1	a	f	g	e	b	e	e	e	b	a	d	d	g			b		b	a	b	e	b	e	e	c			b	b	d	a	c	c	b	d	d	c	c	c	c	c	b	4	1	4	4	4
		1	a	g	a	a	a	a	a	a	a	a	a	a	e	c		a	e	c	c	c	e	a	f	a	c			c	c	g	a	a	a	b	b	b	c	b	c	c	c	c	1	2	3	4	5
		1	a	g	g	d	g	b	e	e	a	a	c	d	e	a		c		c	c	c	e	a	a	a	a	a	c	c	c	g	a	c	c	b	c	c	c	b	c	c	b	c	1	2	3	4	5
		1	a	g	g	g	g	e	e	d	b	a	b	d	g			c		c	c	c	e	a	f	f	c			c	c	c	b	b	d	a	d	d	c	c	b	c	d	c	3	4	3	3	3
		1	b	a	a	a	a	a	a	a	b	a	a	a	b3			a	e	c	a	b	b	b	e	d	a	a	b	b	b	f		a	a	a	b	b	c	c	c	d	b	c	5	4	3	3	4
		1	b	a	a	a	a	a	a	a	b	a	a	a	g			a	a	c	c	a	b	a	a	e	a	b,a	c	c	a	g		c	a	a	a	b	b	b	b	d	c	c	4	4	4	3	3
		1	a	e	a	a	a	a	a	a	b	a	a	a	g			a	e	a	c	c	e	c	f	e	c			c	b	g	b	a	a	b	a	a	c	c	c	d	b	a	4	5	4	5	4
		1	a	c	g	e	b	c	e	d	a	a	g1	g1	b1			c		c	c	c	d	a	f	e	c			b	a	g		c	d	a	d	d	a	b	b	b	c	a	4	4	4	4	4
		1	a	d	e	e	b	e	e	e	a	a	e	d	b			c		b	a	a	a	a	e	d	a	a	a	a	a	c	a	c	c	a	c	c	c	c	b	d	c	d	5	5	4	5	5
		1	a	e	g	b	b	c	e	e	a	g	g1	d	b1			c		b	a	a	a	a	e	d	a	a	a	a	a	c	a	c	c	a	c	c	c	c	c	d	c	d	3	4	4	4	4
		1	a	f	a	a	a	a	a	a	b	a	a	a	b3			a	e	c	c	c	e	c	f	d	c			c	c	g	b	a	a	b	a	a	b	b	b	d	b	c	4	4	4	4	4
		4	a	d	f	d	c	b	d	b	a	b	c	d	e	a		c		a	a	c	b	a	e	e	a	a	a	a	c	e	a	b	d	a	d	d	c	b	c	d	a	d	5	3	3	3	3
		4	a	f	g	g	b	g	e	f	a	g	c	f	e	a	3	e		a	a	a	a	a	a	d	a	d	a	b	a	c	a	c	c	a	d	d	b	c	b	a	a	a	5	5	5	5	5
		4	b	a	a	a	a	a	a	a	a	b	a	a	c			a	a	a	a	b	a	a	a	f	a	a,b,c,d	a	a	a	g		c	a	a	a	a	c	c	b	c	c	c	3	3	3	3	3
		4	a	e	f	e	b	c,e,h8	e	e	a	f	c,f	d	g			c		c	c	c	b	b	a	a	c			b	c	g		d	d	b	d	d	c	c	b	c	c	c	4	4	4	4	4
		4	a	f	g	f	b	b	e	d	a	g	c,f	g5	e	a		d		a	a	b	b	b	d	d	a	a	a	b	c	a		b	c	a	d	d	c	c	c	c	d	b	5	5	5	5	5
		4	a	e	a	a	a	a	a	a	b	d	a	a	c			a	b	a	c	a	b	a	b	b	a	b	b	b	b	a		a	a	b	b	d	b	a	a	a	a	a	1	2	3	4	5
Q3 During the past 30 days, on how many days did you smoke cigarettes?
a. 0 days
b. 1 or 2 days
c. 3 to 5 days
d. 6 to 9 days
e. 10 to 19 days
f. 20 to 29 days
g. All 30 days
Q9Have you ever tried or experimented with e-cigarette use?
a. Yes
b. No
Q10During the past 30 days, on how many days did you use e-cigarettes?
a. 0 days
b. 1 or 2 days
c. 3 to 5 days
d. 6 to 9 days
e. 10 to 19 days
f. 20 to 29 days
g. All 30 days
Q13Which of the following best describes rules regarding tobacco use in your school?
a. Smoking is allowed inside school buildings (przejdź do pytania 16)
b. Smoking is allowed in selected areas?…………………… (przejdź do pytania 16)
c. smoking is prohibited inside school buildings (przejdź do pytania 16)
d. smoking is prohibited inside school buildings but not outside school buildings on school premises/property (przejdź do pytania 16)
e. smoking is prohibited both inside school buildings and outside school buildings on school premises/property (np. boisko szkolne)
f. There is no policy or rule (przejdź do pytania 16)
g. do not know (przejdź do pytania 16)
Q 29Does your school have a policy or rule specifically prohibiting use of e-cigarettes?
a. yes
b. No
c. Do noot know
Q30 Which of the following best describes rules regarding tobacco use in your school?
a) Smoking is allowed inside school buildings (przejdź do pytania 16)
b) Smoking is allowed in selected areas?…………………… (przejdź do pytania 16)
c) smoking is prohibited inside school buildings (przejdź do pytania 16)
d) smoking is prohibited inside school buildings but not outside school buildings on school premises/property (przejdź do pytania 16)
e) smoking is prohibited both inside school buildings and outside school buildings on school premises/property (np. boisko szkolne)
f) There is no policy or rule (przejdź do pytania 16)
g) do not know (przejdź do pytania 16)
Q32 Do your parents (guardians) smoke?
a. No, none of the parents (guardians) do not smoke
b. Yes, smokes both parents (guardians)
c. Yes, smokes father (guardian)
d. Yes, smokes mother (guardian)
e. I do not know
Q40. Do you think that smoking harms your health?
a. definitely not
b. probably not
c. probably
d. Definitely yes
Q41. Do any of your best friends smoke cigarettes?
a. none of them
b. some of them
c. Most of them
d. all
Q44. How would you rate the harmfulness of e-cigarettes compared to regular cigarettes?
a. Much less harmful
b. Less harmful
c. as harmful
d. The more harmful
e. Much more damaging
Q49 Alcohol use
a) Non-drinker
b) Moderate
c) Binge
Q80. How old are you?
Q81. What is your gender?
a. boy
b. girl
Q82. What is the education of your mother?
a. Low
b. Medium
c. High
Q83. What is the education of your father?
a. Low
b. Medium
c. High
Q84. Money available per month
a. Less than 100 zł
b. 100 zł or more
[truncated: 58 more columns]

## Sheet: Sheet 2
Numer ankiety	Typ szkoły szkoły	Klasa	Pyt. 1	Pyt. 2	Pyt. 3	Pyt. 4	Pyt. 5	Pyt. 6	Pyt. 7	Pyt. 8	Pyt. 9	Pyt. 10	Pyt. 11	Pyt. 12	Pyt. 13	Pyt. 14	Pyt. 15	Pyt. 16	Pyt. 17	Pyt. 18	Pyt. 19	Pyt. 20	Pyt. 21	Pyt. 22	Pyt. 23	Pyt. 24	Pyt. 25	Pyt. 26	Pyt. 27	Pyt. 28	Pyt. 29	Pyt. 30	Pyt. 31	Pyt. 32	Pyt. 33	Pyt. 34	Pyt. 35	Pyt. 36	Pyt. 37	Pyt. 38	Pyt. 39	Pyt. 40	Pyt. 41	Pyt. 42	Pyt. 43 A	Pyt. 43 B	Pyt. 43 C	Pyt. 43 D	Pyt. 43 E
moszczenica		1	b	a	a	a	a	a	a	a	b	a	a	a	a			a	e	c	c	a	b	a	b	a	c			a	c	e	a	c	a	b	a	b	b	b	c	d	b	b	5	4	3	3	4
moszczenica		1	b	a	a	a	a	a	a	a	a	b	a	a	e	b	0	a	b	a	c	a	e	c	f	b	a	a,b,c,d	a	a	c	d	a	b	a	b	a	d	c	c	c	c	c	c	3	4	2	3	5
moszczenica		1	b	a	a	a	a	a	a	a	b	a	a	a	e	c	0	a	e	c	c	c	b	a	b	a	c			a	c	e	a	a	a	b	a	b	b	b	c	d	b	c	5	4	3	3	4
moszczenica		1	a	e	a	a	a	a	a	a	b	a	a	a	d			a	e	a	c	a	a	a	b	f	a	a,b,c,d	a	a	c	g		c	b	a	a	c	b	b	b	d	b	d	4	4	3	4	5
moszczenica		1	a	c	a	a	a	a	a	a	b	a	a	a	e	c	0	a	e	c	c	a	b	c	c	f	a	b	a	c	c	g		d	b	a	a	b	b	b	c	d	a	d	5	4	3	4	5
moszczenica		1	a	c	a	a	a	a	a	a	a	a	a	a	e	c	0	a	c	a	a	a	a,b	a	b	f	a	a,b,c,d	a	a	c	g		a	b	a	a	c	b	b	b	d	a	c	5	5	3	4	5
moszczenica		1	b	a	a	a	a	a	a	a	a	a	a	a	e	c	0	a	e	a	c	c	b	a	b	f	a	a,b,c,d	a	a	c	g		c	a	b	a	b	b	b	b	d	a	d	5	5	3	4	5
moszczenica		1	a	d	a	a	a	a	a	a	b	a	a	a	c			a	d	c	c	c	b	a	b	a	c			a	c	e	a	d	a	b	a	b	b	b	c	d	b	d	5	5	3	3	5
moszczenica		1	b	a	a	a	a	a	a	a	b	a	a	a	e	c	0	a	e	d	c	c	e	a	f	f	a	b,c,d	a	c	c	g		c	a	a	a	b	b	b	b	a	a	c	1	3	3	4	4
moszczenica		1	b	a	a	a	a	a	a	a	b	a	a	a	e	c	0	a	c	c	c	c	b	a	f	f	a	b,c,d	a	c	c	g		a	a	a	a	b	b	b	b	d	a	c	5	4	3	4	4
moszczenica		2	b	a	a	a	a	a	a	a	a	a	a	a	g			a	e	b	b	b	d	a	a	f	c			a	b	g		a	a	a	a	b	c	c	c	b	a	a	1	3	3	1	1
moszczenica		2	b	a	a	a	a	a	a	a	a	a	a	a	g			a	e	b	b	c	d	c	a	f	c			b	b	g		a	a	a	a	a	c	c	c	b	a	a	1	3	3	3	5
moszczenica		1	b	a	a	a	a	a	a	a	b	a	a	a	e	a	0	a	e	a	a	a	b	a	f	e	a	b	a	a	b	f		a	a	a	a	a	b	b	c	d	c	d	5	5	4	5	5
moszczenica		1	a	e	a	a	a	a	a	a	a	b	a	a	e	a	0	a	e	c	a	a	b	a	b	f	a	a,c,d	a	a	c	d	b	b	a	a	a	d	c	c	a	d	c	a	3	3	4	4	4
moszczenica		1	a	e	a	a	a	a	a	a	a	a	a	a	e	a	0	a	e	a	a	a	e	a	b	d	a	a,b,c,d	c	a	b	f		a	a	b	a	c	b	b	c	d	a	d	4	4	4	2	4
moszczenica		1	b	a	a	a	a	a	a	a	a	f	a	a	e	a	0	a	e	a	a	a	a	a	e	e	a	c	a	a	b	f		c	a	b	a	a	b	b	b	d	b	d	5	5	5	4	4
moszczenica		1	b	a	a	a	a	a	a	a	b	a	a	a	g			a	e	a	a	a	a	a	f	e	a	a,b,c,d	a	a	b	f		c	b	a	a	b	c	b	b	a	b	a	4	3	3	3	4
moszczenica		1	a	d	a	a	a	a	a	a	b	a	a	a	e	c	0	a	e	c	c	c	e	a	f	e	a	c,d	a	a	a	d	b	a	a	a	a	b	b	b	b	d	b	d	5	5	3	5	5
moszczenica		1	b	a	a	a	a	a	a	a	b	a	a	a	e	b	0	a	e	a	a	a	a	a	f	d	a	b	c	b	b	g		c	a	b	a	c	c	c	b	d	b	c	4	4	3	4	4
moszczenica		2	a	e	a	a	a	a	a	a	a	a	a	a	g			a	e	a	c	a	b	a	b	f	a	a,c	c	b	c	f		d	a	b	a	b	c	b	c	c	b	c	5	4	3	3	4
moszczenica		1	b	a	a	a	a	a	a	a	b	a	a	a	e	c	0	a	e	a	a	a	a	c	f	f	a	a,b,c,d	a	a	c	g		c	a	a	a	a	b	b	a	d	c	c	5	4	3	4	5
moszczenica		1	b	a	a	a	a	a	a	a	b	a	a	a	e	c	0	a	e	a	a	a	a	a	a	f	a	a,b,c,d	a	a	c	g		a	a	a	a	a	b	b	b	a	c	a	5	5	5	5	5
moszczenica		1	a	d	a	a	a	a	a	a	b	a	a	a	e	a	0	a	e	a	a	a	a	a	f	f	a	d	a	c	c	e	b	a	a	b	a	a	c	b	b	d	b	c	4	4	3	3	4
moszczenica		2	a	f	f	e	b	b	e	e	a	a	e	f	e	a	0		e	c	c	c	b	b	a	e	a	c,d	a	a	a	f		a	d	a	d	d	c	b	b	c	c	a	4	2	5	3	4
moszczenica		2	a	e	a	a	a	a	a	a	a	b	a	a	e	c	0	a	d	c	c	c	e	b	d	d	a	b	c	c	c	e	b	d	a	a	a	b	c	b	b	c	b	c	4	4	3	1	5
moszczenica		2	a	d	a	a	a	a	a	a	b	a	a	a	g			a	e	a	a	a	b	a	f	e	a	b,c,d	c	a	c	f		a	a	b	a	c	c	b	c	d	b	c	4	4	3	3	5
moszczenica		1	b	a	a	a	a	a	a	a	b	a	a	a	e	c	0	a	e	c	c	c	a,b	b	b	f	a	a,b,c,d	c	a	a	e	a	a	a	b	b	b	b	b	c	d	b	c	5	4	3	4	4
moszczenica		1	b	a	a	a	a	a	a	a	b	a	a	a	e	a	0	a	e	a	a	a	b	a	e	e	a	abcd	a	a	c	f		a	a	a	a	a	b	b	b	d	c	d	5	5	3	5	5
moszczenica		1	a	d	a	a	a	a	a	a	a	a	a	a	g			a	e	a	a	a	b	a	e	e	a	b	a	c	a	f		c	a	a	a	b	b	b	b	a	b	c	5	4	3	3	4
moszczenica		1	a	d	a	a	a	a	a	a	a	b	a	a	e	b	0	a	a	c	c	c	e	b	a	c	a	d	b	b	b	f		b	a	b	a	d	c	c	b	c	c	c	4	2	2	2	4
moszczenica		1	a	e	a	a	a	a	a	a	b	a	a	a	g			a	e	c	c	c	e	c	f	f	c			c	c	c		c	a	b	a	a	b	b	b	d	c	c	5	3	3	3	5
moszczenica		1	b	a	a	a	a	a	a	a	b	a	a	a	e	a	0	a	e	a	a	a	a	c	f	f	c			c	b	f		a	a	b	a	c	c	c	c	d	a	c	5	4	3	4	4
moszczenica		1	b	a	a	a	a	a	a	a	b	a	a	a	g			a	d	a	a	a	b	b	d	d	a	a,b,c,d	c	b	a	f		a	a	b	a	b	b	b	c	d	b	d	5	5	4	2	5
moszczenica		2	a	f	a	a	a	a	a	a	a	a	a	a	g			a	e	c	c	c	e	c	f	d	a	b	c	b	a	f		a	c	b	a	b	b	b	c	d	b	d	5	5	4	4	5
moszczenica		1	b	a	a	a	a	a	a	a	b	a	a	a	e	a	0	a	e	a	a	a	b	a	f	d	a	c,d	a	a	a	f		a	a	a	a	a	b	b	b	d	b	d	5	4	3	4	5
moszczenica		1	b	a	a	a	a	a	a	a	b	a	a	a	e	b	0	a	e	a	a	a	a,b,c,d	c	f	f	a	a,b,c,d	a	a	a	f		a	a	a	a	a	b	b	b	a	a	c	5	5	3	5	5
moszczenica		1	b	a	a	a	a	a	a	a	b	a	a	a	c			a	e	a	c	c	e	c	a	a	a	a,b,c,d	c	a	a	g		a	a	a	a	a	b	b	b	d	a	d	4	3	3	3	4
moszczenica		1	b	a	a	a	a	a	a	a	b	a	a	a	c			a	e	a	c	c	e	c	a	d	a	a,b,c,d	c	a	a	g		a	a	a	a	c	b	b	b	a	b	c	4	3	3	3	4
moszczenica		1	b	a	a	a	a	a	a	a	b	a	a	a	e	c	0	a	e	c	c	c	e	a	f	f	a	a	c	c	c	e	b	c	a	b	a	b	b	b	b	d	b	d	5	5	5	5	5
moszczenica		2	a	c	g	d	e	b	a	a	a	g	e	g	g			d	a	c	c	c	e	c	a	f	c			c	c	g		a	d	a	d	d	b	a	b	a	d	b	5	2	4	3	3
moszczenica		2	a	c	g	e	e	b	a	a	a	g	b	g8	g			d	a	c	c	c	e	c	a	f	c			c	c	g		a	d	a	d	d	b	a	b	a	d	b	2	5	3	5	3
moszczenica		1	b	a	a	a	a	a	a	a	b	a	a	a	d			a	e	b	c	c	e	c	c	e	c			c	c	a		a	a	b	a	a	b	b	c	a	a	a	1	1	1	1	1
moszczenica		1	b	a	a	a	a	a	a	a	b	a	a	a	e	c	0	a	d	c	c	c	e	c	f	f	a	d	c	c	c	e	a	c	a	b	a	c	c	c	c	c	a	d	4	4	4	4	4
moszczenica		1	a	c	a	a	a	a	a	a	a	g	a	a	e	c	0	a	e	b	a	b	d	c	c	c	a	b	a	b	a	d	c	b	a	a	c	d	b	c	b	a	a	b	2	3	1	4	3
moszczenica		1	b	a	a	a	a	a	a	a	b	a	a	a	c			a	e	a	a	a	a	a	c	f	c			c	c	g		d	a	a	a	d	c	b	c	d	b	b	4	3	3	3	3
moszczenica		1	a	e	a	a	a	a	a	a	b	a	a	a	d			a	e	a	c	c	b	b	a	d	a	a,b,c,d	c	c	c	g		a	a	b	b	b	a	b	b	b	b	c	4	2	4	3	3
moszczenica		1	a	d	f	d	b	b	c	b	a	b	f	f	g			b	e	c	c	c	e	c	f	f	c			c	c	g		e	c	a	c	c	c	c	c	d	c	c	3	3	3	3	3
moszczenica		1	b	a	a	a	a	a	a	a	b	a	a	a	c			a	e	c	c	a	e	c	f	f	c			c	c	g		c	a	b	a	a	c	c	c	b	b	c	3	3	3	1	3
moszczenica		1	a	d	a	a	a	a	a	a	a	a	a	a	e	a	0	a	e	c	c	a	e	b	e	e	a	d	c	c	c	g		c	a	a	b	c	c	b	c	a	b	c	4	3	4	4	4
moszczenica		1	b	a	a	a	a	a	a	a	b	a	a	a	c			a	e	a	a	b	a	a	d	b	a	c	a	a	a	e	a	b	a	a	a	a	b	b	a	d	b	d	4	4	4	4	4
moszczenica		1	a	d	g	e	b	b	e	a	a	g	e	b	e	a	0	a	b	a	a	a	a	a	a	b	a	b,c	a	a	a	e	a	c	a	a	b	b	b	b	b	d	c	d	5	5	5	5	5
moszczenica		1	b	a	a	a	a	a	a	a	b	a	a	a	g			a	e	a	a	a	b	b	f	a	a	b	a	a	c	g		a	a	a	a	a	c	c	c	c	b	c	5	4	3	3	5
moszczenica		2	a	e	a	a	a	a	a	a	b	a	a	a	e	c	0	a	e	c	c	c	e	c	f	f	c			a	a	e	b	b	a	a	a	c	b	b	b	d	b	d	5	5	3	1	5
moszczenica		2	a	e	a	a	a	a	a	a	b	a	a	a	e	c	0	a	e	a	a	a	e	c	a	b	a	b,c,d	a	c	c	g		a	a	a	a	d	c	c	c	d	b	c	5	4	4	5	4
moszczenica		2	a	f	b	b	g	b	a	a	b	a	e	b	e	b	0	a	e	a	a	a	a,b	a	a	e	a	b	a	a	a	e	a	a	b	a	c	c	b	b	b	d	b	c	5	5	4	4	5
moszczenica		2	a	e	a	a	a	a	a	a	a	a	a	a	e	a	0	a	e	a	a	c	a	a	c	d	a	c,d	a	b	c	e	a	a	a	a	a	d	b	b	c	d	b	d	5	3	4	4	5
moszczenica		2	a	e	b	b	f	b	a	b	a	a	e	f	e	a	0	a	e	a	a	a	b	c	f	f	a	d	c	c	c	g		d	a	a	b	b	c	b	b	d	b	d	5	5	3	4	5
moszczenica		2	a	e	a	a	a	a	a	a	b	a	a	a	e	b	0	a	e	a	c	a	e	c	a	b	a	b,c,d	a	c	c	g		a	a	a	a	a	b	b	b	d	b	c	5	4	3	4	4
moszczenica		2	a	e	a	a	a	a	a	a	b	a	a	a	e	a	0	a	e	c	c	c	b	c	e	e	a	b,c	c	c	a	e	a	a	a	a	a	a	c	b	c	d	b	c	5	4	3	3	4
moszczenica		2	a	e	a	a	a	a	a	a	b	a	a	a	e	a	0	a	e	a	a	a	b	c	e	e	a	a,b	a	c	a	e	a	a	a	a	a	c	c	c	c	c	b	c	1	1	1	1	1
moszczenica		2	a	d	f	d	g	b	b	c	a	a	b	f	e	a	0		e	a	c	e	a	a	f	a	a	c,d	a	c	a	e	a	d	c	a	c	c	b	b	b	d	b	c	4	4	3	4	4
moszczenica		2	a	d	e	c	g	b	b	c	a	a	g	f	e	c	0	a	e	a	a	a	b	c	b	f	a	d	c	c	c	g		d	a	a	b	b	c	b	b	d	b	b	5	5	3	5	5
moszczenica		1	b	a	a	a	a	a	a	a	b	a	a	a	d			a	e	a	c	a	e	a	e	f	a	b	a	a	a	d	a	a	a	a	a	a	b	b	a	d	b	d	4	4	4	4	4
moszczenica		1	b	a	a	a	a	a	a	a	b	a	a	a	e	a	0	a	e	c	a	a	b	a	f	d	a	b,c,d	a	c	c	g		a	c	a	a	b	b	b	c	d	a	c	5	4	2	5	5
moszczenica		1	b	a	a	a	a	a	a	a	b	a	a	a	e	a	0	a	d	b	b	d	b	b	a	c	a	b	b	a	b	e	b	a	a	b	a	a	b	b	c	d	b	d	5	5	5	5	5
moszczenica		1	b	a	a	a	a	a	a	a	a	b	a	a	e	b	0	a	b	b	b	b	e	b	a	b	b			b	a	g		b	a	a	a	d	c	c	c	c	b	c	5	5	5	5	5
moszczenica		1	a	e	g	g	g	b	e	f	a	g	c	b	d			d	c	b	b	b	d	b	e	a	a	b	a	a	a	c		b	d	b	d	d	a	a	b	a	d	a	1	1	1	1	1
moszczenica		1	b	a	a	a	a	a	a	a	b	a	a	a	e	a	0	a	c	a	a	a	b	a	b	b	a	b,c,d	a	a	c	g		c	a	a	a	b	c	c	a	d	b	d	5	5	5	5	5
moszczenica		2	b	a	a	a	a	a	a	a	b	a	a	a	d			a	e	c	c	c	e	a	f	f	c			c	c	g		d	a	b	a	c	b	b	b	d	b	d	5	3	3	4	5
moszczenica		1	b	a	a	a	a	a	a	a	b	a	a	a	g			a	e	c	c	c	e	a	f	f	c			c	a	g		a	a	a	a	a	b	b	c	d	a	d	5	3	3	4	5
moszczenica		2	b	a	a	a	a	a	a	a	b	a	a	a	e	c	0	a	e	c	c	c	e	a	b	a	c			a	a	g		b	a	b	a	a	c	c	c	d	b	d	5	5	3	4	5
moszczenica		2	a	f	a	a	a	a	a	a	b	a	a	a	e	c	0	a	b	a	a	a	a	a	a	a	a	a,b,c	a	b	b	g		c	a	a	a	a	b	b	b	d	a	c	3	5	2	5	5
moszczenica		2	a	d	a	a	a	a	a	a	b	a	a	a	e	b	0	a	e	b	b	b	b	a	f	a	b			b	b	e	b	d	a	b	a	a	b	b	b	d	a	c	5	3	3	4	4
moszczenica		1	b	a	a	a	a	a	a	a	a	b	a	a	e	b	0	a	d	a	a	a	b	c	a	a	a	a,b,c,d	b	c	c	g		a	a	b	a	b	c	b	b	c	c	c	4	3	3	4	4
moszczenica		2	a	e	a	a	a	a	a	a	b	a	a	a	e	b	0	a	e	c	a	a	b	b	a	e	a	d	a	b	b	g		b	a	b	b	b	c	b	c	d	a	a	4	3	2	4	5
moszczenica		2	a	c	a	a	a	a	a	a	a	a	a	a	e	b	0	a	e	b	b	b	b	a	c	d	a	b,c,d	a	b	b	e	a	a	a	b	a	c	b	b	b	d	a	d	5	4	4	4	5
moszczenica		2	b	a	a	a	a	a	a	a	b	a	a	a	a			a	b	a	a	a	b	a	b	b	a	b,c	a	a	c	e	a	b	a	b	a	a	b	b	b	d	b	b	5	5	4	4	5
moszczenica		1	b	a	a	a	a	a	a	a	b	a	a	a	c			a	e	c	c	a	b	b	a	b	a	a	c	c	b	c		b	a	a	a	a	c	b	b	c	b	a	4	1	3	3	4
moszczenica		2	b	a	a	a	a	a	a	a	b	a	a	a	c			a	d	a	a	a	a	a	a	c	a	a,b	a	a	a	a		a	a	a	c	a	b	b	c	d	a	d	5	4	5	5	5
moszczenica		2	b	a	a	a	a	a	a	a	b	a	a	a	c			a	e	a	c	a	e	b	e	e	a	d	b	c	c	g		a	a	a	a	a	c	b	c	d	b	d	4	2	2	3	3
moszczenica		2	a	f	a	a	a	a	a	a	a	b	a	a	c			a	e	a	a	a	e	c	b	c	a	b	c	a	c	g		a	a	a	a	d	c	c	b	d	c	c	4	3	3	3	3
moszczenica		2	a	f	g	d	c	b	e	d	a	e	f	c	e	c	0		e	a	a	a	b	c	b	a	c			c	a	c		d	b	a	c	d	c	c	c	d	c	c	4	3	3	3	4
moszczenica		2	a	f	a	a	a	a	a	a	a	b	a	a	g			a	e	a	a	a	e	c	f	f	c			c	c	g		d	a	a	a	d	c	b	c	c	d	b	4	3	3	3	3
moszczenica		2	a	b	g	g	e	b	e	f	a	g	c	g	a			d	a	b	b	b	d	b	a	e	b			b	b	a		b	d	b	d	d	b	b	c	a	d	a	1	1	1	1	1
moszczenica		2	b	a	a	a	a	a	a	a	a	b	a	a	c			a	e	a	a	a	b	a	c	f	c			b	c	g		c	a	b	a	a	c	c	c	d	d	d	4	4	1	4	4
moszczenica		2	a	f	a	a	a	a	a	a	a	c	a	a	c			a	e	a	a	a	b	c	b	c	a	b	c	a	c	g		d	a	a	a	d	c	c	b	d	c	b	4	3	3	3	4
moszczenica		1	b	a	a	a	a	a	a	a	b	a	a	a	e	c	0	a	d	a	a	c	b	b	d	d	a	c,d	a	a	c	g		a	a	b	a	b	b	b	b	d	a	d	5	4	3	4	5
moszczenica		2	a	f	a	a	a	a	a	a	b	a	a	a	d			a	e	a	a	a	b	b	a	f	a	a,b,c,d	c	c	a	g		a	a	a	a	a	b	b	b	a	a	b	1	4	3	5	5
moszczenica		1	b	a	a	a	a	a	a	a	b	a	a	a	e	b	0	a	e	a	a	a	a	b	a	c	a	a,c	a	a	a	e	b	a	a	b	a	d	b	b	a	d	a	d	5	2	2	2	5
moszczenica		1	b	a	a	a	a	a	a	a	b	a	a	a	e	b	0	a	b	a	a	a	b	b	c	b	a	c,d	c	b	a	e	a	a	a	b	a	a	b	b	b	d	a	c	5	4	3	5	5
moszczenica		1	b	a	a	a	a	a	a	a	b	a	a	a	e	b	0	a	d	a	a	a	e	b	a	a	a	b	c	b	c	e	b	c	a	a	a	b	b	b	b	d	a	d	5	5	4	5	5
moszczenica		2	a	f	a	a	a	a	a	a	b	a	a	a	c			a	e	a	c	c	b	a	f	f	a	a,c,d	a	c	c	c		c	a	a	a	b	c	c	b	d	b	c	5	5	3	5	5
moszczenica		2	a	f	a	a	a	a	a	a	b	a	a	a	e	c	0	a	e	a	a	a	b	c	a	f	a	a,b,c,d	c	c	a	e	a	b	a	b	a	a	b	b	b	d	b	d	5	5	5	5	5
moszczenica		3	a	e	a	a	a	a	a	a	b	a	a	a	e	c	0	a	e	a	a	a	b	b	e	c	c			a	a	e	a	c	a	a	a	a	b	b	b	d	b	c	4	3	5	4	5
moszczenica		2	b	a	a	a	a	a	a	a	b	a	a	a	e	a	0	a	e	a	a	a	e	b	a	f	a	b,c	a	a	c	e	b	a	a	a	a	a	c	c	b	d	a	d	5	5	4	4	5
moszczenica		1	b	a	a	a	a	a	a	a	b	a	a	a	e	b	0	a	a	a	a	a	d	a	a	a	a	a,d	a	a	a	e	a	d	a	b	a	a	b	b	b	d	b	d	5	4	4	5	5
moszczenica		3	a	d	a	a	a	a	a	a	b	a	a	a	c			a	e	c	c	a	e	c	a	a	c			c	c	g		a	a	a	a	b	c	c	c	d	d	c	4	3	3	4	5
moszczenica		2	b	a	a	a	a	a	a	a	b	a	a	a	e	b	0	a	a	b	a	a	e	b	a	a	a	b,c	a	b	b	e	b	a	d	a	a	d	b	b	a	c	d	b	1	1	2	1	1
moszczenica		3	a	f	b	b	d	b	a	b	a	c	e	f	e	a	0	a	e	a	a	a	b	b	a	e	c			a	c	g		b	b	b	c	c	c	b	b	d	b	d	5	5	3	4	5
moszczenica		2	a	b	a	a	a	a	a	a	b	a	a	a	e	b	0	a	e	c	c	c	e	a	a	b	a	c,d	c	a	a	e	a	a	a	b	a	c	c	b	b	d	b	c	5	5	5	5	5
moszczenica		2	a	d	a	a	a	a	a	a	b	a	a	a	d			a	e	a	c	a	b	a	e	f	a	c,d	a	a	a	c		a	a	a	a	b	c	c	b	d	b	c	5	5	3	5	5
moszczenica		3	a	f	a	a	a	a	a	a	a	b	a	a	d			a	a	a	b	b	b	a	b	a	c			b	a	a		b	a	a	c	a	c	a	c	c	b	c	3	4	3	1	3
moszczenica		1	b	a	a	a	a	a	a	a	b	a	a	a	c			a	e	a	a	a	b	a	a	f	c			a	a	e	a	a	a	a	a	a	b	b	c	c	a	c	4	4	3	3	4
moszczenica		3	a	e	a	a	a	a	a	a	a	a	a	a	d			a	e	a	a	a	a,b	a	e	f	a	c,d	a	a	a	c		a	a	a	a	b	c	c	b	d	b	d	5	5	3	5	5
moszczenica		3	a	e	f	e	b	b	e	d	a	g	f	d	c				e	a	c	a	a,b	a	e	f	a	c.d	a	a	a	c		d	c	a	c	c	b	b	b	d	b	d	5	4	2	2	4
moszczenica		3	a	e	a	a	a	a	a	a	a	b	a	a	e	b	0	a	e	a	a	c	e	b	a	b	a	a,c,d	a	b	c	e	a	a	b	a	a	a	b	b	b	d	a	d	1	2	3	1	1
moszczenica		3	a	d	a	a	a	a	a	a	b	a	a	a	e	a	0	a	e	a	a	a	e	b	f	b	a	b,c,d	a	c	a	e	a	c	a	a	a	b	c	c	c	d	a	d	5	5	4	5	5
moszczenica		3	a	f	a	a	a	a	a	a	b	a	a	a	c			a	e	a	c	a	b	a	e	f	a	c,d	a	c	c	c		d	a	a	b	b	b	b	b	d	b	c	5	5	3	5	5
moszczenica		2	b	a	a	a	a	a	a	a	b	a	a	a	e	a	0	a	e	a	a	a	a	a	a	e	a	c	a	a	b	d	a	a	a	a	a	a	b	b	a	d	a	d	5	2	2	5	5
moszczenica		2	b	a	a	a	a	a	a	a	b	a	a	a	e	b	0	a	b	a	a	a	b	a	a	b	a	a,b,c,d	a	a	a	e	a	a	a	a	b	b	c	b	b	d	b	d	5	5	4	4	4
moszczenica		3	a	b	a	a	a	a	a	a	a	a	a	a	c			a	e	c	c	c	e	c	a	a	a	a	a	c	c	f		c	a	a	a	b	c	c	a	b	d	b	3	3	3	3	3
moszczenica		3	a	b	g	g	e	b	e	f	a	g	c	g	a			d	a	b	b	b	d	b	a	e	b			b	b	a		b	d	b	d	d	b	b	c	a	d	a	1	1	1	1	1
moszczenica		3	a	e	a	a	a	a	a	a	b	a	a	a	e	b	0	a	a	a	a	a	d	a	a	a	a	a,c	a	a	a	e	b	b	a	b	a	c	b	b	a	d	a	d	4	4	3	3	4
moszczenica		1	b	a	a	a	a	a	a	a	b	a	a	a	e	b	0	a	a	a	a	a	d	a	a	a	a	b,d	a	a	a	e	a	a	a	a	a	a	b	b	c	a	a	a	5	5	5	5	5
moszczenica		1	b	a	a	a	a	a	a	a	b	a	a	a	e	b	0	a	b	a	a	a	b	a	a	b	a	a,b,c,d	a	a	a	e	a	a	a	a	b	b	b	b	c	d	b	d	5	5	4	4	4
moszczenica		1	b	a	a	a	a	a	a	a	b	a	a	a	e	b	0	a	e	c	c	c	e	a	a	b	c			c	c	e	a	c	a	a	a	a	b	b	c	d	b	c	5	1	3	5	5
moszczenica		1	b	a	a	a	a	a	a	a	b	a	a	a	e	b	0	a	b	a	a	a	b	a	a	b	a	a,b,c,d	a	a	a	e	a	a	a	a	a	b	b	b	b	d	b	d	5	5	4	4	4
moszczenica		2	b	a	a	a	a	a	a	a	b	a	a	a	e	b	0	a	e	a	a	a	b	b	a	c	c			c	b	g		a	a	a	a	a	b	c	b	d	b	d	5	5	3	5	5
moszczenica		1	b	a	a	a	a	a	a	a	b	a	a	a	e	b	0	a	e	a	a	a	b	b	a	c	c			c	b	g		a	a	a	a	a	c	b	c	d	b	d	5	5	4	5	5
moszczenica		2	b	a	a	a	a	a	a	a	b	a	a	a	e	c	0	a	e	a	e	a	c	b	a	a	a	a,b,c,d	c	b	a	e	b	d	a	b	a	a	c	c	c	d	b	d	5	5	4	5	5
moszczenica		2	b	a	a	a	a	a	a	a	b	a	a	a	e	c	0	a	e	a	a	a	b	b	a	f	c			c	b	g		a	a	a	a	a	b	b	c	d	a	d	5	5	3	5	5
moszczenica		2	b	a	a	a	a	a	a	a	b	a	a	a	e	a	0	a	e	a	a	a	a	a	e	d	a	b,c	a	a	a	e	a	a	a	a	a	a	b	b	b	d	a	d	5	5	4	3	5
moszczenica		1	b	a	a	a	a	a	a	a	a	a	a	a	e	c	0	a	e	a	c	a	b	a	e	c	a	a	a	a	a	e	a	a	a	a	a	b	c	b	c	d	b	d	4	4	4	3	5
moszczenica		1	b	a	a	a	a	a	a	a	b	a	a	a	e	a	0	a	e	a	a	a	b	a	f	d	a	a,b,c,d	a	a	a	e	a	a	a	a	b	b	b	b	b	d	a	d	5	5	4	3	5
moszczenica		3	a	f	a	a	a	a	a	a	a	a	a	a	e	a	0	a	e	a	a	c	a,b	b	e	b	a	b,c,d	b	b	b	f		b	a	a	a	d	b	b	c	d	b	a	2	1	2	5	4
moszczenica		3	a	c	g	d	c	b	e	e	a	e	d	f	e	a	0	a	d	a	c	c	b	c	a	e	a	b,c	b	c	c	e	b	a	d	a	d	d	b	c	b	d	c	d	5	3	4	5	5
moszczenica		3	a	f	a	a	a	a	a	a	b	a	a	a	g			a	d	a	c	a	b	c	c	d	a	c	c	b	c	e	a	a	a	b	a	d	b	b	c	d	b	c	4	3	4	4	4
moszczenica		1	b	a	a	a	a	a	a	a	b	a	a	a	e	a	0	a	e	a	a	a	b	a	b	e	a	b,c,d	a	a	a	e	a	d	a	a	a	c	b	b	b	d	a	d	1	1	3	1	5
moszczenica		1	b	a	a	a	a	a	a	a	b	a	a	a	e	c	0	a	e	a	a	a	b	a	f	f	a	c,d	a	a	c	e	a	c	a	a	a	a	b	b	c	d	b	c	5	4	3	3	5
moszczenica		1	b	a	a	a	a	a	a	a	b	a	a	a	e	c	0	a	e	a	a	a	b	a	a	f	c			c	c	e	a	a	a	a	a	c	b	b	a	d	b	c	5	4	3	4	5
moszczenica		3	a	f	a	a	a	a	a	a	a	a	a	a	e	a	0	a	e	a	a	a	a	a	f	e	a	b,c	a	c	a	g		d	a	a	a	c	c	c	c	d	b	d	5	3	3	4	3
moszczenica		2	b	a	a	a	a	a	a	a	a	a	a	a	e	c	0	a	e	a	a	a	b	a	f	f	c			a	c	e	a	b	c	a	a	b	c	b	c	d	b	c	4	2	3	4	5
moszczenica		3	a	b	g	c	b	b	e	a	a	g	e	d	e	a	0	a	b	a	a	a	a	a	a	b	a	b,c	a	a	a	e	a	c	a	a	b	b	b	b	b	d	c	d	5	5	5	5	5
moszczenica		1	b	a	a	a	a	a	a	a	b	a	a	a	e	c	0	a	e	a	a	a	b	a	a	f	c			c	c	e	a	c	a	a	a	c	b	b	a	d	b	c	5	4	3	4	5
moszczenica		1	b	a	a	a	a	a	a	a	b	a	a	a	a			a	e	c	c	a	b	a	b	a	c			a	c	e	a	c	a	b	a	b	b	b	c	d	b	b	5	4	3	3	4
moszczenica		2	b	a	a	a	a	a	a	a	a	a	a	a	e	c	0	a	e	a	a	a	b	a	f	f	c			a	c	e	a	b	c	a	a	b	c	b	c	d	b	c	4	2	3	4	5
moszczenica		1	b	a	a	a	a	a	a	a	b	a	a	a	e	c	0	a	e	c	c	c	b	a	b	a	c			a	c	e	a	a	a	b	a	b	b	b	c	d	b	c	5	4	3	3	4
moszczenica		3	a	e	g	c	b	b	e	b	b	a	f	b	d			a	e	a	c	a	a	a	b	f	a	a,b,c,d	a	a	c	g		c	b	a	a	c	b	b	b	d	b	d	4	4	3	4	5
moszczenica		3	a	c	a	a	a	a	a	a	b	a	a	a	e	c	0	a	e	c	c	a	b	c	c	f	a	b	a	c	c	g		d	b	a	a	b	b	b	c	d	a	d	5	4	3	4	5
moszczenica		3	a	c	a	a	a	a	a	a	a	a	a	a	e	c	0	a	c	a	a	a	a,b	a	b	f	a	a,b,c,d	a	a	c	g		a	b	a	a	c	b	b	b	d	a	c	5	5	3	4	5
moszczenica		2	b	a	a	a	a	a	a	a	a	a	a	a	e	c	0	a	e	a	c	c	b	a	b	f	a	a,b,c,d	a	a	c	g		c	a	b	a	b	b	b	b	d	a	d	5	5	3	4	5
moszczenica		3	a	d	a	a	a	a	a	a	b	a	a	a	c			a	d	c	c	c	b	a	b	a	c			a	c	e	a	d	a	b	a	b	b	b	c	d	b	d	5	5	3	3	5
moszczenica		2	b	a	a	a	a	a	a	a	b	a	a	a	e	c	0	a	e	d	c	c	e	a	f	f	a	b,c,d	a	c	c	g		c	a	a	a	b	b	b	b	a	a	c	1	3	3	4	4
moszczenica		2	b	a	a	a	a	a	a	a	b	a	a	a	e	c	0	a	c	c	c	c	b	a	f	f	a	b,c,d	a	c	c	g		a	a	a	a	b	b	b	b	d	a	c	5	4	3	4	4
moszczenica		2	b	a	a	a	a	a	a	a	a	a	a	a	g			a	e	b	b	b	d	a	a	f	c			a	b	g		a	a	a	a	b	c	c	c	b	a	a	1	3	3	1	1
moszczenica		2	b	a	a	a	a	a	a	a	a	a	a	a	g			a	e	b	b	c	d	c	a	f	c			b	b	g		a	a	a	a	a	c	c	c	b	a	a	1	3	3	3	5
moszczenica		1	b	a	a	a	a	a	a	a	b	a	a	a	e	a	0	a	e	a	a	a	b	a	f	e	a	b	a	a	b	f		a	a	a	a	a	b	b	c	d	c	d	5	5	4	5	5
moszczenica		3	a	e	g	e	b	b	e	b	a	b	d	f	e	a	0	a	e	c	a	a	b	a	b	f	a	a,c,d	a	a	c	d	b	b	b	a	c	d	c	c	a	d	c	a	3	3	4	4	4
moszczenica		3	a	e	g	d	b	c	c	b	a	b	f	f	g			b	e	c	c	c	e	c	f	f	c			c	c	g		e	c	a	c	c	c	c	c	d	c	c	3	3	3	3	3
moszczenica		2	b	a	a	a	a	a	a	a	a	f	a	a	e	a	0	a	e	a	a	a	a	a	e	e	a	c	a	a	b	f		c	a	b	a	a	b	b	b	d	b	d	5	5	5	4	4
moszczenica		2	b	a	a	a	a	a	a	a	b	a	a	a	g			a	e	a	a	a	a	a	f	e	a	a,b,c,d	a	a	b	f		c	b	a	a	b	c	b	b	a	b	a	4	3	3	3	4
moszczenica		3	a	e	a	a	a	a	a	a	b	a	a	a	e	c	0	a	e	c	c	c	e	a	f	e	a	c,d	a	a	a	d	b	a	a	a	a	b	b	b	b	d	b	d	5	5	3	5	5
moszczenica		2	b	a	a	a	a	a	a	a	b	a	a	a	e	b	0	a	e	a	a	a	a	a	f	d	a	b	c	b	b	g		c	a	b	a	c	c	c	b	d	b	c	4	4	3	4	4
moszczenica		3	a	e	a	a	a	a	a	a	a	a	a	a	g			a	e	a	c	a	b	a	b	f	a	a,c	c	b	c	f		d	a	b	a	b	c	b	c	c	b	c	5	4	3	3	4
moszczenica		1	b	a	a	a	a	a	a	a	b	a	a	a	e	c	0	a	e	a	a	a	a	c	f	f	a	a,b,c,d	a	a	c	g		c	a	a	a	a	b	b	a	d	c	c	5	4	3	4	5
moszczenica		1	b	a	a	a	a	a	a	a	b	a	a	a	e	c	0	a	e	a	a	a	a	a	a	f	a	a,b,c,d	a	a	c	g		a	a	a	a	a	b	b	b	a	c	a	5	5	5	5	5
moszczenica		3	a	f	a	a	a	a	a	a	b	a	a	a	e	a	0	a	e	a	a	a	a	a	f	f	a	d	a	c	c	e	b	a	a	b	a	a	c	b	b	d	b	c	4	4	3	3	4
moszczenica		3	a	f	g	e	b	c	e	e	a	a	e	f	e	a	0		e	c	c	c	b	b	a	e	a	c,d	a	a	a	f		a	d	a	d	d	c	b	b	c	c	a	4	2	5	3	4
moszczenica		3	a	e	g	c	b	g	b	a	a	b	e	d	e	c	0	a	d	c	c	c	e	b	d	d	a	b	c	c	c	e	b	d	b	a	b	b	c	b	b	c	b	c	4	4	3	1	5
moszczenica		3	a	d	a	a	a	a	a	a	b	a	a	a	g			a	e	a	a	a	b	a	f	e	a	b,c,d	c	a	c	f		a	a	b	a	c	c	b	c	d	b	c	4	4	3	3	5
moszczenica		2	b	a	a	a	a	a	a	a	b	a	a	a	e	c	0	a	e	c	c	c	a,b	b	b	f	a	a,b,c,d	c	a	a	e	a	a	a	b	b	b	b	b	c	d	b	c	5	4	3	4	4
moszczenica		1	b	a	a	a	a	a	a	a	b	a	a	a	e	a	0	a	e	a	a	a	b	a	e	e	a	abcd	a	a	c	f		a	a	a	a	a	b	b	b	d	c	d	5	5	3	5	5
moszczenica		3	a	f	a	a	a	a	a	a	a	a	a	a	g			a	e	a	a	a	b	a	e	e	a	b	a	c	a	f		c	a	a	a	b	b	b	b	a	b	c	5	4	3	3	4
moszczenica		3	a	f	g	b	f	e	a	e	a	b	e	b	e	b	0	a	a	c	c	c	e	b	a	c	a	d	b	b	b	f		b	c	b	b	d	c	c	b	c	c	c	4	2	2	2	4
moszczenica		3	a	e	a	a	a	a	a	a	b	a	a	a	g			a	e	c	c	c	e	c	f	f	c			c	c	c		c	a	b	a	a	b	b	b	d	c	c	5	3	3	3	5
moszczenica		2	b	a	a	a	a	a	a	a	b	a	a	a	e	a	0	a	e	a	a	a	a	c	f	f	c			c	b	f		a	a	b	a	c	c	c	c	d	a	c	5	4	3	4	4
moszczenica		2	b	a	a	a	a	a	a	a	b	a	a	a	g			a	d	a	a	a	b	b	d	d	a	a,b,c,d	c	b	a	f		a	a	b	a	b	b	b	c	d	b	d	5	5	4	2	5
moszczenica		3	a	f	a	a	a	a	a	a	a	a	a	a	g			a	e	c	c	c	e	c	f	d	a	b	c	b	a	f		a	c	b	a	b	b	b	c	d	b	d	5	5	4	4	5
moszczenica		1	b	a	a	a	a	a	a	a	b	a	a	a	e	a	0	a	e	a	a	a	b	a	f	d	a	c,d	a	a	a	f		a	a	a	a	a	b	b	b	d	b	d	5	4	3	4	5
moszczenica		2	b	a	a	a	a	a	a	a	b	a	a	a	e	b	0	a	e	a	a	a	a,b,c,d	c	f	f	a	a,b,c,d	a	a	a	f		a	a	a	a	a	b	b	b	a	a	c	5	5	3	5	5
moszczenica		1	b	a	a	a	a	a	a	a	b	a	a	a	c			a	e	a	c	c	e	c	a	a	a	a,b,c,d	c	a	a	g		a	a	a	a	a	b	b	b	d	a	d	4	3	3	3	4
moszczenica		1	b	a	a	a	a	a	a	a	b	a	a	a	c			a	e	a	c	c	e	c	a	d	a	a,b,c,d	c	a	a	g		a	a	a	a	c	b	b	b	a	b	c	4	3	3	3	4
moszczenica		2	b	a	a	a	a	a	a	a	b	a	a	a	e	c	0	a	e	c	c	c	e	a	f	f	a	a	c	c	c	e	b	c	a	b	a	b	b	b	b	d	b	d	5	5	5	5	5
moszczenica		3	a	c	a	a	a	a	a	a	a	g	a	a	g			a	a	c	c	c	e	c	a	f	c			c	c	g		a	a	a	a	d	b	a	b	a	d	b	5	2	4	3	3
moszczenica		3	a	c	g	c	e	c	a	a	a	g	b	g8	g			d	a	c	c	c	e	c	a	f	c			c	c	g		a	d	a	d	d	b	a	b	a	d	b	2	5	3	5	3
moszczenica		2	b	a	a	a	a	a	a	a	b	a	a	a	d			a	e	b	c	c	e	c	c	e	c			c	c	a		a	a	b	a	a	b	b	c	a	a	a	1	1	1	1	1
moszczenica		2	b	a	a	a	a	a	a	a	b	a	a	a	e	c	0	a	d	c	c	c	e	c	f	f	a	d	c	c	c	e	a	c	a	b	a	c	c	c	c	c	a	d	4	4	4	4	4
moszczenica		3	a	c	g	c	b	h4	b	a	a	g	b	g8	e	c	0	a	e	b	a	b	d	c	c	c	a	b	a	b	a	d	c	b	a	a	c	d	b	c	b	a	a	b	2	3	1	4	3
moszczenica		2	b	a	a	a	a	a	a	a	b	a	a	a	c			a	e	a	a	a	a	a	c	f	c			c	c	g		d	a	a	a	d	c	b	c	d	b	b	4	3	3	3	3
moszczenica		3	a	d	a	a	a	a	a	a	b	a	a	a	d			a	e	a	c	c	b	b	a	d	a	a,b,c,d	c	c	c	g		a	a	b	b	b	a	b	b	b	b	c	4	2	4	3	3
moszczenica		3	a	f	g	d	b	c	c	b	a	b	f	f	g			b	e	c	c	c	e	c	f	f	c			c	c	g		e	c	a	c	c	c	c	c	d	c	c	3	3	3	3	3
moszczenica		2	b	a	a	a	a	a	a	a	b	a	a	a	c			a	e	c	c	a	e	c	f	f	c			c	c	g		c	a	b	a	a	c	c	c	b	b	c	3	3	3	1	3
moszczenica		3	a	f	a	a	a	a	a	a	a	a	a	a	e	a	0	a	e	c	c	a	e	b	e	e	a	d	c	c	c	g		c	a	a	b	c	c	b	c	a	b	c	4	3	4	4	4
moszczenica		2	b	a	a	a	a	a	a	a	b	a	a	a	c			a	e	a	a	b	a	a	d	b	a	c	a	a	a	e	a	b	a	a	a	a	b	b	a	d	b	d	4	4	4	4	4
moszczenica		3	a	f	a	a	a	a	a	a	b	a	a	a	c			a	e	a	a	a	b	c	c	f	a	b	a	a	a	g		c	a	b	d	a	a	b	b	d	c	d	5	4	3	4	5
moszczenica		2	b	a	a	a	a	a	a	a	b	a	a	a	g			a	e	a	a	a	b	b	f	a	a	b	a	a	c	g		a	a	a	a	a	c	c	c	c	b	c	5	4	3	3	5
moszczenica		3	a	f	a	a	a	a	a	a	b	a	a	a	e	c	0	a	e	c	c	c	e	c	f	f	c			a	a	e	b	b	a	a	a	c	b	b	b	d	b	d	5	5	3	1	5
moszczenica		3	a	e	a	a	a	a	a	a	b	a	a	a	e	c	0	a	e	a	a	a	e	c	a	b	a	b,c,d	a	c	c	g		a	a	a	a	d	c	c	c	d	b	c	5	4	4	5	4
moszczenica		3	a	f	a	a	a	a	a	a	b	a	a	a	e	b	0	a	e	a	a	a	a,b	a	a	e	a	b	a	a	a	e	a	a	a	a	a	c	b	b	b	d	b	c	5	5	4	4	5
moszczenica		3	a	e	g	c	f	c	a	a	a	a	e	d	e	a	0	a	e	a	a	c	a	a	c	d	a	c,d	a	b	c	e	a	a	c	a	b	d	b	b	c	d	b	d	5	3	4	4	5
moszczenica		3	a	e	g	c	f	b	a	b	a	a	e	d	e	a	0	a	e	a	a	a	b	c	f	f	a	d	c	c	c	g		d	a	a	b	b	c	b	b	d	b	d	5	5	3	4	5
moszczenica		3	a	e	a	a	a	a	a	a	b	a	a	a	e	b	0	a	e	a	c	a	e	c	a	b	a	b,c,d	a	c	c	g		a	a	a	a	a	b	b	b	d	b	c	5	4	3	4	4
moszczenica		3	a	e	a	a	a	a	a	a	b	a	a	a	e	a	0	a	e	c	c	c	b	c	e	e	a	b,c	c	c	a	e	a	a	a	a	a	a	c	b	c	d	b	c	5	4	3	3	4
moszczenica		3	a	e	g	c	c	b	a	b	b	a	e	d	e	a	0	a	e	a	a	a	b	c	e	e	a	a,b	a	c	a	e	a	a	c	a	c	c	c	c	c	c	b	c	1	1	1	1	1
moszczenica		3	a	f	g	d	g	e	b	c	a	a	b	f	e	a	0		e	a	c	e	a	a	f	a	a	c,d	a	c	a	e	a	d	c	a	c	c	b	b	b	d	b	c	4	4	3	4	4
moszczenica		3	a	f	g	c	g	b	b	c	a	a	g	f	e	c	0	a	e	a	a	a	b	c	b	f	a	d	c	c	c	g		d	a	a	b	b	c	b	b	d	b	b	5	5	3	5	5
moszczenica		2	b	a	a	a	a	a	a	a	b	a	a	a	d			a	e	a	c	a	e	a	e	f	a	b	a	a	a	d	a	a	a	a	a	a	b	b	a	d	b	d	4	4	4	4	4
moszczenica		2	b	a	a	a	a	a	a	a	b	a	a	a	e	a	0	a	e	c	a	a	b	a	f	d	a	b,c,d	a	c	c	g		a	c	a	a	b	b	b	c	d	a	c	5	4	2	5	5
moszczenica		2	b	a	a	a	a	a	a	a	b	a	a	a	e	a	0	a	d	b	b	d	b	b	a	c	a	b	b	a	b	e	b	a	a	b	a	a	b	b	c	d	b	d	5	5	5	5	5
moszczenica		2	b	a	a	a	a	a	a	a	a	b	a	a	e	b	0	a	b	b	b	b	e	b	a	b	b			b	a	g		b	a	a	a	d	c	c	c	c	b	c	5	5	5	5	5
moszczenica		1	a	e	g	g	g	h4	e	f	a	g	c	b	d			d	c	b	b	b	d	b	e	a	a	b	a	a	a	c		d	d	b	d	d	a	a	b	a	d	a	1	1	1	1	1
moszczenica		2	b	a	a	a	a	a	a	a	b	a	a	a	e	a	0	a	c	a	a	a	b	a	b	b	a	b,c,d	a	a	c	g		c	a	a	a	b	c	c	a	d	b	d	5	5	5	5	5
moszczenica		2	b	a	a	a	a	a	a	a	b	a	a	a	d			a	e	c	c	c	e	a	f	f	c			c	c	g		d	a	b	a	c	b	b	b	d	b	d	5	3	3	4	5
moszczenica		2	b	a	a	a	a	a	a	a	b	a	a	a	g			a	e	c	c	c	e	a	f	f	c			c	a	g		a	a	a	a	a	b	b	c	d	a	d	5	3	3	4	5
moszczenica		2	b	a	a	a	a	a	a	a	b	a	a	a	e	c	0	a	e	c	c	c	e	a	b	a	c			a	a	g		b	a	b	a	a	c	c	c	d	b	d	5	5	3	4	5
moszczenica		3	a	f	a	a	a	a	a	a	b	a	a	a	e	c	0	a	b	a	a	a	a	a	a	a	a	a,b,c	a	b	b	g		c	a	a	a	a	b	b	b	d	a	c	3	5	2	5	5
moszczenica		3	a	f	a	a	a	a	a	a	b	a	a	a	e	b	0	a	e	b	b	b	b	a	f	a	b			b	b	e	b	d	a	b	a	a	b	b	b	d	a	c	5	3	3	4	4
moszczenica		2	b	a	a	a	a	a	a	a	a	b	a	a	e	b	0	a	d	a	a	a	b	c	a	a	a	a,b,c,d	b	c	c	g		a	a	b	a	b	c	b	b	c	c	c	4	3	3	4	4
moszczenica		3	a	e	a	a	a	a	a	a	b	a	a	a	e	b	0	a	e	c	a	a	b	b	a	e	a	d	a	b	b	g		b	a	b	b	b	c	b	c	d	a	a	4	3	2	4	5
moszczenica		3	a	c	a	a	a	a	a	a	a	a	a	a	e	b	0	a	e	b	b	b	b	a	c	d	a	b,c,d	a	b	b	e	a	a	a	b	a	c	b	b	b	d	a	d	5	4	4	4	5
moszczenica		2	b	a	a	a	a	a	a	a	b	a	a	a	a			a	b	a	a	a	b	a	b	b	a	b,c	a	a	c	e	a	b	a	b	a	a	b	b	b	d	b	b	5	5	4	4	5
moszczenica		2	b	a	a	a	a	a	a	a	b	a	a	a	c			a	e	c	c	a	b	b	a	b	a	a	c	c	b	c		b	a	a	a	a	c	b	b	c	b	a	4	1	3	3	4
moszczenica		2	b	a	a	a	a	a	a	a	b	a	a	a	c			a	d	a	a	a	a	a	a	c	a	a,b	a	a	a	a		a	a	a	c	a	b	b	c	d	a	d	5	4	5	5	5
moszczenica		2	b	a	a	a	a	a	a	a	b	a	a	a	c			a	e	a	c	a	e	b	e	e	a	d	b	c	c	g		a	a	a	a	a	c	b	c	d	b	d	4	2	2	3	3
moszczenica		3	a	e	g	d	c	b	e	d	a	b	e	e	c			a	e	a	a	a	e	c	b	c	a	b	c	a	c	g		a	c	a	c	d	c	c	b	d	c	c	4	3	3	3	3
moszczenica		3	a	f	g	d	c	b	e	d	a	e	f	c	e	c	0		e	a	a	a	b	c	b	a	c			c	a	c		d	b	a	c	d	c	c	c	d	c	c	4	3	3	3	4
moszczenica		3	a	e	g	d	c	b	e	d	a	e	f	c	e	c	0		e	a	a	a	b	c	b	a	c			c	a	c		d	b	a	c	d	c	c	c	d	c	c	4	3	3	3	4
moszczenica		3	a	f	g	c	b	c	e	c	a	b	d	f	e	c	0	a	e	c	c	c	e	c	a	f	c			c	c	a		e	a	b	a	a	c	c	c	a	a	a	4	4	4	4	4
moszczenica		2	b	a	a	a	a	a	a	a	a	b	a	a	c			a	e	a	a	a	b	a	c	f	c			b	c	g		c	a	b	a	a	c	c	c	d	d	d	4	4	1	4	4
moszczenica		3	a	f	a	a	a	a	a	a	a	c	a	a	c			a	e	a	a	a	b	c	b	c	a	b	c	a	c	g		d	a	a	a	d	c	c	b	d	c	b	4	3	3	3	4
moszczenica		2	b	a	a	a	a	a	a	a	b	a	a	a	e	c	0	a	d	a	a	c	b	b	d	d	a	c,d	a	a	c	g		a	a	b	a	b	b	b	b	d	a	d	5	4	3	4	5
moszczenica		3	a	e	a	a	a	a	a	a	b	a	a	a	d			a	e	a	a	a	b	b	a	f	a	a,b,c,d	c	c	a	g		a	a	a	a	a	b	b	b	a	a	b	1	4	3	5	5
moszczenica		2	b	a	a	a	a	a	a	a	b	a	a	a	e	b	0	a	e	a	a	a	a	b	a	c	a	a,c	a	a	a	e	b	a	a	b	a	d	b	b	a	d	a	d	5	2	2	2	5
moszczenica		2	b	a	a	a	a	a	a	a	b	a	a	a	e	b	0	a	b	a	a	a	b	b	c	b	a	c,d	c	b	a	e	a	a	a	b	a	a	b	b	b	d	a	c	5	4	3	5	5
moszczenica		2	b	a	a	a	a	a	a	a	b	a	a	a	e	b	0	a	d	a	a	a	e	b	a	a	a	b	c	b	c	e	b	c	a	a	a	b	b	b	b	d	a	d	5	5	4	5	5
moszczenica		3	a	d	a	a	a	a	a	a	b	a	a	a	c			a	e	a	c	c	b	a	f	f	a	a,c,d	a	c	c	c		c	a	a	a	b	c	c	b	d	b	c	5	5	3	5	5
moszczenica		3	a	d	a	a	a	a	a	a	b	a	a	a	e	c	0	a	e	a	a	a	b	c	a	f	a	a,b,c,d	c	c	a	e	a	b	a	b	a	a	b	b	b	d	b	d	5	5	5	5	5
moszczenica		3	b	a	a	a	a	a	a	a	b	a	a	a	e	c	0	a	e	a	e	a	c	b	a	a	a	a,b,c,d	c	b	a	e	b	d	a	b	a	a	c	c	c	d	b	d	5	5	4	5	5
moszczenica		3	b	a	a	a	a	a	a	a	b	a	a	a	e	c	0	a	e	a	a	a	b	b	a	f	c			c	b	g		a	a	a	a	a	b	b	c	d	a	d	5	5	3	5	5
moszczenica		2	b	a	a	a	a	a	a	a	b	a	a	a	e	a	0	a	e	a	a	a	a	a	e	d	a	b,c	a	a	a	e	a	a	a	a	a	a	b	b	b	d	a	d	5	5	4	3	5
moszczenica		3	a	d	a	a	a	a	a	a	b	a	a	a	c			a	e	c	c	a	e	c	a	a	c			c	c	g		a	a	a	a	b	c	c	c	d	d	c	4	3	3	4	5
moszczenica		3	b	a	a	a	a	a	a	a	b	a	a	a	e	b	0	a	a	b	a	a	e	b	a	a	a	b,c	a	b	b	e	b	a	d	a	a	d	b	b	a	c	d	b	1	1	2	1	1
moszczenica		3	b	a	a	a	a	a	a	a	b	a	a	a	e	c	0	a	e	a	e	a	c	b	a	a	a	a,b,c,d	c	b	a	e	b	d	a	b	a	a	c	c	c	d	b	d	5	5	4	5	5
moszczenica		3	b	a	a	a	a	a	a	a	b	a	a	a	e	c	0	a	e	a	a	a	b	b	a	f	c			c	b	g		a	a	a	a	a	b	b	c	d	a	d	5	5	3	5	5
moszczenica		3	b	a	a	a	a	a	a	a	b	a	a	a	e	a	0	a	e	a	a	a	a	a	e	d	a	b,c	a	a	a	e	a	a	a	a	a	a	b	b	b	d	a	d	5	5	4	3	5
moszczenica		3	b	a	a	a	a	a	a	a	b	a	a	a	e	c	0	a	e	a	e	a	c	b	a	a	a	a,b,c,d	c	b	a	e	b	d	a	b	a	a	c	c	c	d	b	d	5	5	4	5	5
moszczenica		2	b	a	a	a	a	a	a	a	b	a	a	a	e	c	0	a	e	a	a	a	b	b	a	f	c			c	b	g		a	a	a	a	a	b	b	c	d	a	d	5	5	3	5	5
moszczenica		3	b	a	a	a	a	a	a	a	b	a	a	a	e	a	0	a	e	a	a	a	a	a	e	d	a	b,c	a	a	a	e	a	a	a	a	a	a	b	b	b	d	a	d	5	5	4	3	5
moszczenica		3	a	e	g	e	b	b	e	d	a	g	f	d	c				e	a	c	a	a,b	a	e	f	a	c.d	a	a	a	c		d	c	a	c	c	b	b	b	d	b	d	5	4	2	2	4
moszczenica		3	a	e	g	d	c	b	e	d	a	e	f	c	e	c	0		e	a	a	a	b	c	b	a	c			c	a	c		d	b	a	c	d	c	c	c	d	c	c	4	3	3	3	4
moszczenica		3	b	a	a	a	a	a	a	a	b	a	a	a	e	c	0	a	e	a	e	a	c	b	a	a	a	a,b,c,d	c	b	a	e	b	d	a	b	a	a	c	c	c	d	b	d	5	5	4	5	5
moszczenica		3	b	a	a	a	a	a	a	a	b	a	a	a	e	c	0	a	e	a	a	a	b	b	a	f	c			c	b	g		a	a	a	a	a	b	b	c	d	a	d	5	5	3	5	5
moszczenica		3	b	a	a	a	a	a	a	a	b	a	a	a	e	a	0	a	e	a	a	a	a	a	e	d	a	b,c	a	a	a	e	a	a	a	a	a	a	b	b	b	d	a	d	5	5	4	3	5
moszczenica		3	b	a	a	a	a	a	a	a	b	a	a	a	e	b	0	a	b	a	a	a	b	a	a	b	a	a,b,c,d	a	a	a	e	a	a	a	a	b	b	c	b	b	d	b	d	5	5	4	4	4
moszczenica		3	b	a	a	a	a	a	a	a	b	a	a	a	e	a	0	a	e	a	a	a	a	a	a	e	a	c	a	a	b	d	a	a	a	a	a	a	b	b	a	d	a	d	5	2	2	5	5
moszczenica		3	b	a	a	a	a	a	a	a	b	a	a	a	e	b	0	a	b	a	a	a	b	a	a	b	a	a,b,c,d	a	a	a	e	a	a	a	a	b	b	c	b	b	d	b	d	5	5	4	4	4
moszczenica		3	b	a	a	a	a	a	a	a	b	a	a	a	e	c	0	a	e	a	e	a	c	b	a	a	a	a,b,c,d	c	b	a	e	b	d	a	b	a	a	c	c	c	d	b	d	5	5	4	5	5
moszczenica		2	b	a	a	a	a	a	a	a	b	a	a	a	e	c	0	a	e	a	a	a	b	b	a	f	c			c	b	g		a	a	a	a	a	b	b	c	d	a	d	5	5	3	5	5
moszczenica		2	b	a	a	a	a	a	a	a	b	a	a	a	e	a	0	a	e	a	a	a	a	a	e	d	a	b,c	a	a	a	e	a	a	a	a	a	a	b	b	b	d	a	d	5	5	4	3	5
moszczenica		2	b	a	a	a	a	a	a	a	b	a	a	a	e	b	0	a	e	c	c	c	e	a	a	b	c			c	c	e	a	c	a	a	a	a	b	b	c	d	b	c	5	1	3	5	5
moszczenica		2	b	a	a	a	a	a	a	a	b	a	a	a	e	b	0	a	b	a	a	a	b	a	a	b	a	a,b,c,d	a	a	a	e	a	a	a	a	a	b	b	b	b	d	b	d	5	5	4	4	4
moszczenica		3	b	a	a	a	a	a	a	a	b	a	a	a	e	b	0	a	e	a	a	a	b	b	a	c	c			c	b	g		a	a	a	a	a	b	c	b	d	b	d	5	5	3	5	5
moszczenica		2	b	a	a	a	a	a	a	a	b	a	a	a	e	b	0	a	e	a	a	a	b	b	a	c	c			c	b	g		a	a	a	a	a	c	b	c	d	b	d	5	5	4	5	5
moszczenica		3	b	a	a	a	a	a	a	a	b	a	a	a	e	c	0	a	e	a	e	a	c	b	a	a	a	a,b,c,d	c	b	a	e	b	d	a	b	a	a	c	c	c	d	b	d	5	5	4	5	5
moszczenica		3	b	a	a	a	a	a	a	a	b	a	a	a	e	c	0	a	e	a	a	a	b	b	a	f	c			c	b	g		a	a	a	a	a	c	b	c	d	a	d	5	5	3	5	5
moszczenica		3	b	a	a	a	a	a	a	a	b	a	a	a	e	a	0	a	e	a	a	a	a	a	e	d	a	b,c	a	a	a	e	a	a	a	a	a	a	b	b	b	d	a	d	5	5	4	3	5
moszczenica		2	b	a	a	a	a	a	a	a	a	a	a	a	e	c	0	a	e	a	c	a	b	a	e	c	a	a	a	a	a	e	a	a	a	a	a	b	c	b	c	d	b	d	4	4	4	3	5
moszczenica		2	b	a	a	a	a	a	a	a	b	a	a	a	e	a	0	a	e	a	a	a	b	a	f	d	a	a,b,c,d	a	a	a	e	a	a	a	a	b	b	b	b	b	d	a	d	5	5	4	3	5
moszczenica		3	b	a	a	a	a	a	a	a	b	a	a	a	e	c	0	a	e	a	e	a	c	b	a	a	a	a,b,c,d	c	b	a	e	b	d	a	b	a	a	c	c	c	d	b	d	5	5	4	5	5
moszczenica		3	b	a	a	a	a	a	a	a	b	a	a	a	e	c	0	a	e	a	a	a	b	b	a	f	c			c	b	g		a	a	a	a	a	c	b	c	d	a	d	5	5	3	5	5
moszczenica		3	b	a	a	a	a	a	a	a	b	a	a	a	e	a	0	a	e	a	a	a	a	a	e	d	a	b,c	a	a	a	e	a	a	a	a	a	a	b	b	b	d	a	d	5	5	4	3	5
moszczenica		2	b	a	a	a	a	a	a	a	b	a	a	a	e	a	0	a	e	a	a	a	b	a	b	e	a	b,c,d	a	a	a	e	a	d	a	a	a	c	b	b	b	d	a	d	1	1	3	1	5
moszczenica		2	b	a	a	a	a	a	a	a	b	a	a	a	e	c	0	a	e	a	a	a	b	a	f	f	a	c,d	a	a	c	e	a	c	a	a	a	a	b	b	c	d	b	c	5	4	3	3	5
moszczenica		2	b	a	a	a	a	a	a	a	b	a	a	a	e	c	0	a	e	a	a	a	b	a	a	f	c			c	c	e	a	a	a	a	a	c	b	b	a	d	b	c	5	4	3	4	5
moszczenica		3	b	a	a	a	a	a	a	a	b	a	a	a	e	c	0	a	e	a	e	a	c	b	a	a	a	a,b,c,d	c	b	a	e	b	d	a	b	a	a	c	c	c	d	b	d	5	5	4	5	5
moszczenica		3	b	a	a	a	a	a	a	a	b	a	a	a	e	c	0	a	e	a	a	a	b	b	a	f	c			c	b	g		a	a	a	a	a	c	b	c	d	a	d	5	5	3	5	5
moszczenica		3	b	a	a	a	a	a	a	a	b	a	a	a	e	a	0	a	e	a	a	a	a	a	e	d	a	b,c	a	a	a	e	a	a	a	a	a	a	b	b	b	d	a	d	5	5	4	3	4
moszczenica		2	b	a	a	a	a	a	a	a	b	a	a	a	e	c	0	a	e	a	a	a	b	a	a	f	c			c	c	e	a	c	a	a	a	c	b	b	a	d	b	c	5	4	3	4	5
moszczenica		3	b	a	a	a	a	a	a	a	b	a	a	a	e	c	0	a	e	a	e	a	c	b	a	a	a	a,b,c,d	c	b	a	e	b	d	a	b	a	a	c	c	c	d	b	d	5	5	4	5	5
moszczenica		3	b	a	a	a	a	a	a	a	b	a	a	a	e	c	0	a	e	a	a	a	b	b	a	f	c			c	b	g		a	a	a	a	a	c	b	c	d	a	d	5	5	3	5	5
moszczenica		3	a	d	a	a	a	a	a	a	b	a	a	a	c			a	e	c	c	a	e	c	a	a	c			c	c	g		a	a	a	a	b	c	c	c	d	d	c	4	3	3	4	5
moszczenica		3	b	a	a	a	a	a	a	a	b	a	a	a	e	b	0	a	a	b	a	a	e	b	a	a	a	b,c	a	b	b	e	b	a	d	a	a	d	b	b	a	c	d	b	1	1	2	1	1
moszczenica		3	b	a	a	a	a	a	a	a	b	a	a	a	e	c	0	a	e	a	e	a	c	b	a	a	a	a,b,c,d	c	b	a	e	b	d	a	b	a	a	c	c	c	d	b	d	5	5	4	5	5
moszczenica		3	b	a	a	a	a	a	a	a	b	a	a	a	e	c	0	a	e	a	e	a	c	b	a	a	a	a,b,c,d	c	b	a	e	b	d	a	b	a	a	c	c	c	d	b	d	5	5	4	5	5
moszczenica		3	b	a	a	a	a	a	a	a	b	a	a	a	e	a	0	a	e	a	a	a	a	a	e	d	a	b,c	a	a	a	e	a	a	a	a	a	a	b	b	b	d	a	d	5	5	4	3	4
moszczenica		3	b	a	a	a	a	a	a	a	b	a	a	a	e	c	0	a	e	a	e	a	c	b	a	a	a	a,b,c,d	c	b	a	e	b	d	a	b	a	a	c	c	c	d	b	d	5	5	4	5	5
moszczenica		3	b	a	a	a	a	a	a	a	b	a	a	a	e	a	0	a	e	a	a	a	a	a	e	d	a	b,c	a	a	a	e	a	a	a	a	a	a	b	b	b	d	a	d	5	5	4	3	4
moszczenica		3	b	a	a	a	a	a	a	a	b	a	a	a	e	b	0	a	b	a	a	a	b	a	a	b	a	a,b,c,d	a	a	a	e	a	a	a	a	b	b	c	b	b	d	b	d	5	5	4	4	4
moszczenica		3	b	a	a	a	a	a	a	a	b	a	a	a	e	a	0	a	e	a	a	a	a	a	a	e	a	c	a	a	b	d	a	a	a	a	a	a	b	b	a	d	a	d	5	2	2	5	5
moszczenica		3	b	a	a	a	a	a	a	a	b	a	a	a	e	c	0	a	e	a	e	a	c	b	a	a	a	a,b,c,d	c	b	a	e	b	d	a	b	a	a	c	c	c	d	b	d	5	5	4	5	5
moszczenica		3	b	a	a	a	a	a	a	a	b	a	a	a	e	b	0	a	e	a	a	a	b	b	a	c	c			c	b	g		a	a	a	a	a	c	c	b	d	b	d	5	5	3	5	5
moszczenica		3	b	a	a	a	a	a	a	a	b	a	a	a	e	c	0	a	e	a	e	a	c	b	a	a	a	a,b,c,d	c	b	a	e	b	d	a	b	a	a	c	c	c	d	b	d	5	5	4	5	5
moszczenica		3	b	a	a	a	a	a	a	a	b	a	a	a	e	c	0	a	e	a	a	a	b	b	a	f	c			c	b	g		a	a	a	a	a	c	b	c	d	a	d	5	5	3	5	5
moszczenica		3	b	a	a	a	a	a	a	a	b	a	a	a	e	a	0	a	e	a	a	a	a	a	e	d	a	b,c	a	a	a	e	a	a	a	a	a	a	b	b	b	d	a	d	5	5	4	3	4
moszczenica		3	b	a	a	a	a	a	a	a	b	a	a	a	e	c	0	a	e	a	e	a	c	b	a	a	a	a,b,c,d	c	b	a	e	b	d	a	b	a	a	c	c	c	d	b	d	5	5	4	5	5
moszczenica		3	b	a	a	a	a	a	a	a	b	a	a	a	e	a	0	a	e	a	a	a	a	a	e	d	a	b,c	a	a	a	e	a	a	a	a	a	a	b	b	b	d	a	d	5	5	4	3	4
moszczenica		3	b	a	a	a	a	a	a	a	b	a	a	a	e	c	0	a	b	a	e	a	c	b	a	a	a	a,b,c,d	c	b	a	e	b	d	a	b	a	a	c	c	c	d	b	d	5	5	4	5	5
moszczenica		3	b	a	a	a	a	a	a	a	b	a	a	a	e	a	0	a	e	a	a	a	b	b	a	f	c			c	b	g		a	a	a	a	a	a	b	c	d	a	d	5	5	3	5	5
moszczenica		3	b	a	a	a	a	a	a	a	b	a	a	a	e	c	0	a	c	a	e	a	c	b	a	a	a	a,b,c,d	c	b	a	e	b	d	a	b	a	a	c	c	c	d	b	d	5	5	4	5	5
moszczenica		3	b	a	a	a	a	a	a	a	b	a	a	a	e	a	0	a	e	a	a	a	b	b	a	f	c			c	b	g		a	a	a	a	a	a	b	c	d	a	d	5	5	3	5	5
moszczenica		3	a	d	a	a	a	a	a	a	b	a	a	a	c			a	e	c	c	a	e	c	a	a	c			c	c	g		a	a	a	a	b	c	c	c	d	d	c	4	3	3	4	5
moszczenica		3	b	a	a	a	a	a	a	a	b	a	a	a	e	b	0	a	a	b	a	a	e	b	a	a	a	b,c	a	b	b	e	b	a	d	a	a	d	b	b	a	c	d	b	1	1	2	1	1
moszczenica		3	b	a	a	a	a	a	a	a	b	a	a	a	e	c	0	a	b	a	e	a	c	b	a	a	a	a,b,c,d	c	b	a	e	b	d	a	b	a	a	c	c	c	d	b	d	5	5	4	5	5
moszczenica		3	b	a	a	a	a	a	a	a	b	a	a	a	e	c	0	a	c	a	e	a	c	b	a	a	a	a,b,c,d	c	b	a	e	b	d	a	b	a	a	c	c	c	d	b	d	5	5	4	5	5
moszczenica		3	b	a	a	a	a	a	a	a	b	a	a	a	e	a	0	a	e	a	a	a	a	a	e	d	a	b,c	a	a	a	e	a	a	a	a	a	a	b	b	b	d	a	d	5	5	4	3	4
moszczenica		3	b	a	a	a	a	a	a	a	b	a	a	a	e	c	0	a	b	a	e	a	c	b	a	a	a	a,b,c,d	c	b	a	e	b	d	a	b	a	a	c	c	c	d	b	d	5	5	4	5	5
moszczenica		3	b	a	a	a	a	a	a	a	b	a	a	a	e	a	0	a	e	a	a	a	a	a	e	d	a	b,c	a	a	a	e	a	a	a	a	a	a	b	b	b	d	a	d	5	5	4	3	4
moszczenica		3	b	a	a	a	a	a	a	a	b	a	a	a	e	b	0	a	b	a	a	a	b	a	a	b	a	a,b,c,d	a	a	a	e	a	a	a	a	b	b	c	b	b	d	b	d	5	5	4	4	4
moszczenica		3	b	a	a	a	a	a	a	a	b	a	a	a	e	a	0	a	e	a	a	a	a	a	a	e	a	c	a	a	b	d	a	a	a	a	a	a	b	b	a	d	a	d	5	2	2	5	5
moszczenica		3	b	a	a	a	a	a	a	a	b	a	a	a	e	c	0	a	c	a	e	a	c	b	a	a	a	a,b,c,d	c	b	a	e	b	d	a	b	a	a	c	c	c	d	b	d	5	5	4	5	5
moszczenica		3	b	a	a	a	a	a	a	a	b	a	a	a	e	b	0	a	e	a	a	a	b	b	a	c	c			c	b	g		a	a	a	a	a	c	c	b	d	b	d	5	5	3	5	5
moszczenica		3	b	a	a	a	a	a	a	a	b	a	a	a	e	c	0	a	b	a	e	a	c	b	a	a	a	a,b,c,d	c	b	a	e	b	d	a	b	a	b	c	c	c	d	b	d	5	5	4	5	5
moszczenica		3	b	a	a	a	a	a	a	a	b	a	a	a	e	a	0	a	e	a	a	a	b	b	a	f	c			c	b	g		a	a	a	a	a	a	b	c	d	a	d	5	5	3	5	5
moszczenica		3	b	a	a	a	a	a	a	a	b	a	a	a	e	a	0	a	e	a	a	a	a	a	e	d	a	b,c	b	a	a	e	a	a	a	a	a	a	b	b	b	d	a	d	5	5	4	3	4
moszczenica		3	b	a	a	a	a	a	a	a	b	a	a	a	e	c	0	a	c	a	e	a	c	b	a	a	a	a,b,c,d	c	b	a	e	b	d	a	b	a	a	c	c	c	d	b	d	5	5	4	5	5
moszczenica		3	b	a	a	a	a	a	a	a	b	a	a	a	e	a	0	a	e	a	a	a	a	a	e	d	a	b,c	a	a	a	e	a	a	a	a	a	a	b	b	b	d	a	d	5	5	4	3	4
moszczenica		3	b	a	a	a	a	a	a	a	b	a	a	a	e	c	0	a	b	a	e	a	c	b	a	a	a	a,b,c,d	c	b	a	e	b	d	a	b	a	a	c	c	c	d	b	d	5	5	4	5	5
moszczenica		3	b	a	a	a	a	a	a	a	b	a	a	a	e	b	0	a	e	a	a	a	b	b	a	f	c			c	b	g		a	a	a	a	a	a	b	c	d	a	d	5	5	3	5	5
moszczenica		3	b	a	a	a	a	a	a	a	b	a	a	a	e	a	0	a	e	a	a	a	a	a	e	d	a	b,c	a	a	a	e	a	a	a	a	a	b	b	b	b	d	a	d	5	5	4	3	4
moszczenica		3	b	a	a	a	a	a	a	a	b	a	a	a	e	c	0	a	b	a	e	a	c	b	a	a	a	a,b,c,d	c	b	a	e	b	d	a	b	a	a	c	c	c	d	b	d	5	5	4	5	5
moszczenica		3	b	a	a	a	a	a	a	a	b	a	a	a	e	a	0	a	e	a	a	a	b	b	a	f	c			c	b	g		a	a	a	a	b	c	b	c	d	a	d	5	5	3	5	5
ręczno		1	b	a	a	a	a	a	a	a	b	a	a	a	a			a	e	c	c	a	b	a	b	a	c			a	c	e	a	c	a	b	a	b	b	b	c	d	b	b	5	4	3	3	4
ręczno		1	b	a	a	a	a	a	a	a	a	b	a	a	e	b		a	b	a	c	a	e	c	f	b	a	a,b,c,d	a	a	c	d	a	b	a	b	a	d	c	c	c	c	c	c	3	4	2	3	5
ręczno		1	b	a	a	a	a	a	a	a	b	a	a	a	e	c		a	e	c	c	c	b	a	b	a	c			a	c	e	a	a	a	b	a	b	b	b	c	d	b	c	5	4	3	3	4
ręczno		3	a	e	f	d	b	e	c	d	a	e	c	d	e	b	3	d		c	c	b	b	a	c	a	c			b	b	d	a	b	d	a	d	d	c	c	b	c	d	c	4	4	2	4	4
ręczno		3	a	e	a	a	a	a	a	a	a	g	a	a	c			a	e	a	c	b	d	b	f	a	b			b	b	g		b	a	a	a	c	c	c	b	c	c	c	4	4	3	4	4
ręczno		3	a	e	f	d	b	e	c	d	a	e	c	d	e	b		d		c	c	b	b	a	c	a	c			b	b	d	a	b	d	a	d	d	c	c	b	c	d	c	4	4	2	4	4
ręczno		1	b	a	a	a	a	a	a	a	a	a	a	a	e	c		a	e	a	c	c	b	a	b	f	a	a,b,c,d	a	a	c	g		c	a	b	a	b	b	b	b	d	a	d	5	5	3	4	5
ręczno		1	a	d	a	a	a	a	a	a	b	a	a	a	c			a	d	c	c	c	b	a	b	a	c			a	b	e	a	d	a	b	a	b	b	b	c	d	b	d	5	5	3	3	5
ręczno		1	b	a	a	a	a	a	a	a	b	a	a	a	e	c		a	e	d	c	c	e	a	f	f	a	b,c,d	a	c	c	g		c	a	a	a	b	b	b	b	a	a	c	1	3	3	4	4
ręczno		1	b	a	a	a	a	a	a	a	b	a	a	a	e	c		a	c	c	c	c	b	a	f	f	a	b,c,d	a	c	c	g		a	a	a	a	b	b	b	b	d	a	c	5	4	3	4	4
ręczno		2	b	a	a	a	a	a	a	a	a	a	a	a	g			a	e	b	b	b	d	a	a	f	c			a	b	g		a	a	a	a	b	c	c	c	b	a	a	1	3	3	1	1
ręczno		2	b	a	a	a	a	a	a	a	a	a	a	a	g			a	e	b	b	c	d	c	a	f	c			b	b	g		a	a	a	a	a	c	c	c	b	a	a	1	3	3	3	5
ręczno		1	b	a	a	a	a	a	a	a	b	a	a	a	e	a		a	e	a	a	a	b	a	f	e	a	b	a	a	b	f		a	a	a	a	a	b	b	c	d	c	d	5	5	4	5	5
ręczno		2	b	a	a	a	a	a	a	a	b	a	a	a	d			a	e	c	c	c	e	a	f	f	c			c	c	g		d	a	b	a	c	b	b	b	d	b	d	5	3	3	4	5
ręczno		1	a	e	a	a	a	a	a	a	a	a	a	a	e	a		a	e	a	a	a	e	a	b	d	a	a,b,c,d	c	a	b	f		a	a	b	a	c	c	b	c	d	a	d	4	4	4	2	4
ręczno		1	b	a	a	a	a	a	a	a	a	f	a	a	e	a		a	e	a	a	a	a	a	e	e	a	c	a	a	b	f		c	a	b	a	a	b	b	b	d	b	d	5	5	5	4	4
ręczno		1	b	a	a	a	a	a	a	a	b	a	a	a	g			a	e	a	a	a	a	a	f	e	a	a,b,c,d	a	a	b	f		c	b	a	a	b	c	b	b	a	b	a	4	3	3	3	4
ręczno		1	a	e	a	a	a	a	a	a	b	a	a	a	e	c		a	e	c	c	c	e	a	f	e	a	c,d	a	a	a	d	b	d	a	b	a	b	b	b	b	d	b	d	5	5	3	5	5
ręczno		1	b	a	a	a	a	a	a	a	b	a	a	a	e	b		a	e	a	a	a	a	a	f	d	a	b	c	b	b	g		c	a	b	a	c	c	c	b	d	b	c	4	4	3	4	4
ręczno		2	b	a	a	a	a	a	a	a	b	a	a	a	e	c		a	e	c	c	c	e	a	b	a	c			a	a	g		b	a	b	a	a	c	c	c	d	b	d	5	5	3	4	5
ręczno		1	b	a	a	a	a	a	a	a	b	a	a	a	e	c		a	e	a	a	a	a	c	f	f	a	a,b,c,d	a	a	c	g		c	a	a	a	a	b	b	a	d	c	c	5	4	3	4	5
ręczno		1	b	a	a	a	a	a	a	a	b	a	a	a	e	c		a	e	a	a	a	a	a	a	f	a	a,b,c,d	a	a	c	g		a	a	a	a	a	b	b	b	a	c	a	5	5	5	5	5
ręczno		1	a	e	a	a	a	a	a	a	b	a	a	a	e	a		a	e	a	a	a	a	a	f	f	a	d	a	c	c	e	b	d	a	b	a	a	c	b	b	d	b	c	4	4	3	3	4
ręczno		2	a	c	a	a	a	a	a	a	a	a	a	a	e	a		a	e	c	c	c	b	b	a	e	a	c,d	a	a	a	f		b	a	a	a	d	c	b	b	c	c	a	4	2	5	3	4
ręczno		2	a	c	g	c	b	g	b	a	a	b	e	b	e	c		a	d	c	c	c	e	b	d	d	a	b	c	c	c	e	b	d	b	a	b	b	c	b	b	c	b	c	4	4	3	1	5
ręczno		2	b	a	a	a	a	a	a	a	b	a	a	a	a			a	b	a	a	a	b	a	b	b	a	b,c	a	a	c	e	a	b	a	b	a	a	c	b	b	d	b	b	5	5	4	4	5
ręczno		1	b	a	a	a	a	a	a	a	b	a	a	a	e	c		a	e	c	c	c	a,b	b	b	f	a	a,b,c,d	c	a	a	e	a	a	a	b	b	b	c	b	c	d	b	c	5	4	3	4	4
ręczno		1	b	a	a	a	a	a	a	a	b	a	a	a	e	a		a	e	a	a	a	b	a	e	e	a	abcd	a	a	c	f		a	a	a	a	a	b	b	b	d	c	d	5	5	3	5	5
ręczno		1	a	d	g	c	b	c	e	a	a	a	f	b	g			b	e	a	a	a	b	a	e	e	a	b	a	c	a	f		c	c	a	b	b	c	b	b	a	b	c	5	4	3	3	4
ręczno		3	a	d	g	c	f	e	a	e	a	b	e	d	e	b		a	a	c	c	c	e	b	a	c	a	d	b	b	b	f		b	c	b	b	d	c	c	b	c	c	c	4	2	2	2	4
ręczno		3	a	e	g	d	b	b	e	a	b	a	e	d	g			a	e	c	c	c	e	c	f	f	c			c	c	c		b	a	b	a	a	b	b	b	d	c	c	5	3	3	3	5
ręczno		1	b	a	a	a	a	a	a	a	b	a	a	a	e	a		a	e	a	a	a	a	c	f	f	c			c	b	f		a	a	b	a	c	c	c	c	d	a	c	5	4	3	4	4
ręczno		1	b	a	a	a	a	a	a	a	b	a	a	a	g			a	d	a	a	a	b	b	d	d	a	a,b,c,d	c	b	a	f		a	a	b	a	b	b	b	c	d	b	d	5	5	4	2	5
ręczno		2	a	e	a	a	a	a	a	a	b	a	a	a	d			a	e	a	a	a	b	b	a	f	a	a,b,c,d	c	c	a	g		b	a	a	a	a	b	b	b	a	a	b	1	4	3	5	5
ręczno		1	b	a	a	a	a	a	a	a	b	a	a	a	e	a		a	e	a	a	a	b	a	f	d	a	c,d	a	a	a	f		a	a	a	a	a	b	b	b	d	b	d	5	4	3	4	5
ręczno		1	b	a	a	a	a	a	a	a	b	a	a	a	e	b		a	e	a	a	a	a,b,c,d	c	f	f	a	a,b,c,d	a	a	a	f		a	a	a	a	a	c	b	b	a	a	c	5	5	3	5	5
ręczno		1	b	a	a	a	a	a	a	a	b	a	a	a	c			a	e	a	c	c	e	c	a	a	a	a,b,c,d	c	a	a	g		a	a	a	a	a	b	b	b	d	a	d	4	3	3	3	4
ręczno		1	b	a	a	a	a	a	a	a	b	a	a	a	c			a	e	a	c	c	e	c	a	d	a	a,b,c,d	c	a	a	g		a	a	a	a	c	b	b	b	a	b	c	4	3	3	3	4
ręczno		1	b	a	a	a	a	a	a	a	b	a	a	a	e	c		a	e	c	c	c	e	a	f	f	a	a	c	c	c	e	b	c	a	b	a	b	b	b	b	d	b	d	5	5	5	5	5
ręczno		2	a	c	g	c	e	c	e	a	a	g	e	g	g			d	a	c	c	c	e	c	a	f	c			c	c	g		a	d	a	d	d	b	a	b	a	d	b	5	2	4	3	3
ręczno		2	a	c	g	c	e	c	e	a	a	g	b	g8	g			d	a	c	c	c	e	c	a	f	c			c	c	g		a	d	a	d	d	b	a	b	a	d	b	2	5	3	5	3
ręczno		1	b	a	a	a	a	a	a	a	b	a	a	a	d			a	e	b	c	c	e	c	c	e	c			c	c	a		a	a	b	a	a	b	b	c	a	a	a	1	1	1	1	1
ręczno		1	b	a	a	a	a	a	a	a	b	a	a	a	e	c		a	d	c	c	c	e	c	f	f	a	d	c	c	c	e	a	c	a	b	a	c	c	c	c	c	a	d	4	4	4	4	4
ręczno		2	b	a	a	a	a	a	a	a	b	a	a	a	e	b		a	e	a	a	a	b	b	a	c	c			c	b	g		a	a	a	a	a	c	c	b	d	b	d	5	5	3	5	5
ręczno		1	b	a	a	a	a	a	a	a	b	a	a	a	c			a	e	a	a	a	a	a	c	f	c			c	c	g		d	a	a	a	d	c	b	c	d	b	b	4	3	3	3	3
ręczno		2	b	a	a	a	a	a	a	a	b	a	a	a	e	a		a	e	a	a	a	e	b	a	f	a	b,c	a	a	c	e	b	a	a	a	a	a	c	c	b	d	a	d	5	5	4	4	5
ręczno		1	a	d	f	d	b	c	c	b	a	b	e	f	g			b	e	c	c	c	e	c	f	f	c			c	c	g		c	c	a	c	c	c	c	c	d	c	c	3	3	3	3	3
ręczno		2	b	a	a	a	a	a	a	a	b	a	a	a	e	b		a	a	b	a	a	e	b	a	a	a	b,c	a	b	b	e	b	a	d	a	a	d	b	b	a	c	d	b	1	1	2	1	1
ręczno		1	a	d	g	c	b	g	e	a	a	a	f	f	g			a	e	c	c	a	e	b	e	e	a	d	c	c	c	g		c	a	a	b	c	c	b	c	a	b	c	4	3	4	4	4
ręczno		3	a	f	a	a	a	a	a	a	a	a	a	a	e	a		a	e	a	a	a	a	a	f	e	a	b,c	a	c	a	g		d	a	a	a	c	c	c	c	d	b	d	5	3	3	4	3
ręczno		1	a	d	g	c	b	c	e	a	a	g	d	d	g			a	b	a	a	a	a	a	a	b	a	b,c	a	a	a	e	a	c	a	a	b	b	b	b	b	d	c	d	5	5	5	5	5
ręczno		3	b	a	a	a	a	a	a	a	b	a	a	a	e	c		a	e	a	e	a	c	b	a	a	a	a,b,c,d	c	b	a	e	b	d	a	b	a	a	c	c	c	d	b	d	5	5	4	5	5
ręczno		3	b	a	a	a	a	a	a	a	b	a	a	a	e	c		a	e	a	a	a	b	b	a	f	c			c	b	g		a	a	a	a	a	c	b	c	d	a	d	5	5	3	5	5
ręczno		2	a	d	a	a	a	a	a	a	b	a	a	a	e	b		a	e	a	a	a	a,b	a	a	e	a	b	a	a	a	e	a	a	a	a	a	c	b	b	b	d	b	c	5	5	4	4	5
ręczno		2	a	e	g	c	f	c	a	a	a	a	e	b	e	a		a	e	a	a	c	a	a	c	d	a	c,d	a	b	c	e	a	c	c	a	b	d	b	b	c	d	b	d	5	3	4	4	5
ręczno		2	a	e	a	a	a	a	a	a	a	a	a	a	e	a		a	e	a	a	a	b	c	f	f	a	d	c	c	c	g		d	a	a	b	b	c	b	b	d	b	d	5	5	3	4	5
ręczno		2	a	e	a	a	a	a	a	a	b	a	a	a	e	b		a	e	a	c	a	e	c	a	b	a	b,c,d	a	c	c	g		a	a	a	a	a	b	b	b	d	b	c	5	4	3	4	4
ręczno		2	a	e	b	b	c	b	a	b	b	a	e	f	e	a		a	e	a	a	a	b	c	e	e	a	a,b	a	c	a	e	a	c	c	a	c	c	c	c	c	c	b	c	1	1	1	1	1
ręczno		2	a	d	g	d	g	e	b	c	a	a	b	f	e	a			e	a	c	e	a	a	f	a	a	c,d	a	c	a	e	a	d	c	a	c	c	b	b	b	d	b	c	4	4	3	4	4
ręczno		2	a	d	g	c	g	b	b	c	a	a	g	f	e	c		a	e	a	a	a	b	c	b	f	a	d	c	c	c	g		d	a	a	b	b	c	b	b	d	b	b	5	5	3	5	5
ręczno		2	b	a	a	a	a	a	a	a	b	a	a	a	c			a	d	a	a	a	a	a	a	c	a	a,b	a	a	a	a		a	a	a	c	a	c	b	c	d	a	d	5	4	5	5	5
ręczno		2	b	a	a	a	a	a	a	a	b	a	a	a	c			a	e	a	c	a	e	b	e	e	a	d	b	c	c	g		a	a	a	a	a	c	b	c	d	b	d	4	2	2	3	3
ręczno		2	a	c	g	d	c	c	e	d	a	b	e	e	c			a	e	a	a	a	e	c	b	c	a	b	c	a	c	g		a	c	a	c	d	c	c	b	d	c	c	4	3	3	3	3
ręczno		2	a	c	g	d	c	b	e	d	a	e	f	c	e	c			e	a	a	a	b	c	b	a	c			c	b	c		d	b	a	c	d	c	c	c	d	c	c	4	3	3	3	4
ręczno		2	a	e	a	a	a	a	a	a	a	b	a	a	g			a	e	a	a	a	e	c	f	f	c			c	b	g		d	a	a	a	d	c	b	c	c	d	b	4	3	3	3	3
ręczno		2	a	b	g	g	e	h	e	f	a	g	c	g	a			d	a	b	b	b	d	b	a	e	b			b	b	a		b	d	b	d	d	c	b	c	a	d	a	1	1	1	1	1
ręczno		2	b	a	a	a	a	a	a	a	a	b	a	a	c			a	e	a	a	a	b	a	c	f	c			b	c	g		c	a	b	a	a	c	c	c	d	d	d	4	4	1	4	4
ręczno		2	a	f	a	a	a	a	a	a	a	c	a	a	c			a	e	a	a	a	b	c	b	c	a	b	c	a	b	g		d	a	a	a	d	c	c	b	d	c	b	4	3	3	3	4
ręczno		3	a	d	a	a	a	a	a	a	b	a	a	a	e	a		a	e	a	a	a	e	b	f	b	a	b,c,d	a	c	b	e	a	c	a	a	a	b	c	c	c	d	a	d	5	5	4	5	5
ręczno		3	a	f	a	a	a	a	a	a	b	a	a	a	c			a	e	a	c	a	b	a	e	f	a	c,d	a	c	b	c		d	a	a	b	b	b	b	b	d	b	c	5	5	3	5	5
ręczno		2	b	a	a	a	a	a	a	a	b	a	a	a	e	a		a	e	a	a	a	a	a	a	e	a	c	a	a	b	d	a	a	a	a	a	a	b	b	a	d	a	d	5	2	2	5	5
ręczno		2	b	a	a	a	a	a	a	a	b	a	a	a	e	b		a	b	a	a	a	b	a	a	b	a	a,b,c,d	a	a	a	e	a	a	a	a	b	b	c	b	b	d	b	d	5	5	4	4	4
ręczno		3	a	b	a	a	a	a	a	a	a	a	a	a	c			a	e	c	c	c	e	c	a	a	a	a	a	c	b	f		d	a	a	a	b	c	c	a	b	d	b	3	3	3	3	3
ręczno		3	a	b	a	a	a	a	a	a	a	g	a	a	a			a	a	b	b	b	d	b	a	e	b			b	b	a		b	a	b	a	d	c	b	c	a	d	a	1	1	1	1	1
ręczno		3	a	e	a	a	a	a	a	a	b	a	a	a	e	b		a	a	a	a	a	d	a	a	a	a	a,c	a	a	b	e	b	b	a	b	a	c	b	b	a	d	a	d	4	4	3	3	4
ręczno		2	a	f	a	a	a	a	a	a	b	a	a	a	c			a	e	a	c	c	b	a	f	f	a	a,c,d	a	c	b	c		c	a	a	a	b	c	c	b	d	b	c	5	5	3	5	5
ręczno		2	a	d	a	a	a	a	a	a	b	a	a	a	e	c		a	e	a	a	a	b	c	a	f	a	a,b,c,d	c	c	b	e	a	b	a	b	a	a	b	b	b	d	b	d	5	5	5	5	5
ręczno		2	a	b	a	a	a	a	a	a	b	a	a	a	e	b		a	e	c	c	c	e	a	a	b	a	c,d	c	a	a	e	a	d	a	b	a	c	c	b	b	d	b	c	5	5	5	5	5
ręczno		2	a	d	a	a	a	a	a	a	b	a	a	a	d			a	e	a	c	a	b	a	e	f	a	c,d	a	a	a	c		d	a	a	a	b	c	c	b	d	b	c	5	5	3	5	5
ręczno		3	a	f	a	a	a	a	a	a	a	a	a	a	e	a		a	e	a	a	c	a,b	b	e	b	a	b,c,d	b	b	b	f		b	a	a	a	d	b	b	c	d	b	a	2	1	2	5	4
ręczno		3	a	c	g	d	c	b	e	e	a	e	d	f	e	a		a	d	a	c	c	b	c	a	e	a	b,c	b	c	c	e	b	d	d	a	d	d	c	c	b	d	c	d	5	3	4	5	5
ręczno		3	a	f	a	a	a	a	a	a	b	a	a	a	g			a	d	a	c	a	b	c	c	d	a	c	c	b	c	e	a	a	a	b	a	d	b	b	c	d	b	c	4	3	4	4	4
ręczno		2	b	a	a	a	a	a	a	a	a	a	a	a	g			a	e	b	b	b	d	a	a	f	c			a	b	g		a	a	a	a	b	c	c	c	b	a	a	1	3	3	1	1
ręczno		2	b	a	a	a	a	a	a	a	a	a	a	a	g			a	e	b	b	c	d	c	a	f	c			b	b	g		a	a	a	a	a	c	c	c	b	a	a	1	3	3	3	5
ręczno		3	b	a	a	a	a	a	a	a	b	a	a	a	e	c		a	e	a	e	a	c	b	a	a	a	a,b,c,d	c	b	a	e	b	d	a	b	a	a	c	c	c	d	b	d	5	5	4	5	5
ręczno		3	b	a	a	a	a	a	a	a	b	a	a	a	e	c		a	e	a	a	a	b	b	a	f	c			c	b	g		a	a	a	a	a	c	b	c	d	a	d	5	5	3	5	5
ręczno		2	b	a	a	a	a	a	a	a	b	a	a	a	d			a	e	b	c	c	e	c	c	e	c			c	c	a		a	a	b	a	a	b	b	c	a	a	a	1	1	1	1	1
ręczno		3	a	b	g	c	b	b	e	a	a	g	e	d	e	a		a	b	a	a	a	a	a	a	b	a	b,c	a	a	a	e	a	c	a	a	b	b	b	b	b	d	c	d	5	5	5	5	5
ręczno		3	b	a	a	a	a	a	a	a	b	a	a	a	e	b		a	a	b	a	a	e	b	a	a	a	b,c	a	b	b	e	b	a	d	a	a	d	b	b	a	c	d	b	1	1	2	1	1
ręczno		3	b	a	a	a	a	a	a	a	b	a	a	a	e	c		a	e	a	e	a	c	b	a	a	a	a,b,c,d	c	b	a	e	b	d	a	b	a	a	c	c	c	d	b	d	5	5	4	5	5
ręczno		3	b	a	a	a	a	a	a	a	b	a	a	a	e	c		a	e	a	a	a	b	b	a	f	c			c	b	g		a	a	a	a	a	c	b	c	d	a	d	5	5	3	5	5
ręczno		3	b	a	a	a	a	a	a	a	b	a	a	a	e	a		a	e	a	a	a	a	a	e	d	a	b,c	a	a	a	e	a	a	a	a	a	a	b	b	b	d	a	d	5	5	4	3	5
ręczno		3	b	a	a	a	a	a	a	a	b	a	a	a	e	c		a	e	a	e	a	c	b	a	a	a	a,b,c,d	c	b	a	e	b	d	a	b	a	a	c	c	c	d	b	d	5	5	4	5	5
ręczno		2	b	a	a	a	a	a	a	a	b	a	a	a	e	c		a	e	c	c	c	e	a	f	f	a	a	c	c	c	e	b	c	a	b	a	b	b	b	b	d	b	d	5	5	5	5	5
ręczno		3	b	a	a	a	a	a	a	a	b	a	a	a	e	a		a	e	a	a	a	a	a	e	d	a	b,c	a	a	a	e	a	a	a	a	a	a	b	b	b	d	a	d	5	5	4	3	5
ręczno		2	b	a	a	a	a	a	a	a	b	a	a	a	e	a		a	e	c	a	a	b	a	f	d	a	b,c,d	a	c	c	g		a	c	a	a	b	b	b	c	d	a	c	5	4	2	5	5
ręczno		2	b	a	a	a	a	a	a	a	b	a	a	a	e	a		a	d	b	b	d	b	b	a	c	a	b	b	a	b	e	b	a	a	b	a	a	c	b	c	d	b	d	5	5	5	5	5
ręczno		2	b	a	a	a	a	a	a	a	a	b	a	a	e	b		a	b	b	b	b	e	b	a	b	b			b	a	g		b	a	a	a	d	c	c	c	c	b	c	5	5	5	5	5
srock		3	a	d	g	c	f	e	a	e	a	b	e	d	e	b		a	a	c	c	c	e	b	a	c	a	d	b	b	b	f		b	c	b	b	d	c	c	b	c	c	c	4	2	2	2	4
srock		3	a	e	g	d	b	b	e	a	b	a	e	d	g			a	e	c	c	c	e	c	f	f	c			c	c	c		b	a	b	a	a	b	b	b	d	c	c	5	3	3	3	5
srock		3	b	a	a	a	a	a	a	a	b	a	a	a	e	c		a	d	c	c	c	e	c	f	f	a	d	c	c	c	e	a	c	a	b	a	c	c	c	c	c	a	d	4	4	4	4	4
srock		3	b	a	a	a	a	a	a	a	b	a	a	a	e	c		a	d	c	c	c	e	c	f	f	a	d	c	c	c	e	a	d	a	b	a	c	c	c	c	c	a	d	4	4	4	4	4
srock		3	b	a	a	a	a	a	a	a	b	a	a	a	e	c		a	e	c	c	c	a,b	b	b	f	a	a,b,c,d	c	a	a	e	a	a	a	b	b	b	c	b	c	d	b	c	5	4	3	4	4
srock		3	b	a	a	a	a	a	a	a	b	a	a	a	e	a		a	e	a	a	a	a	c	f	f	c			c	b	f		a	a	b	b	c	c	c	c	d	a	c	5	4	3	4	4
srock		3	b	a	a	a	a	a	a	a	b	a	a	a	g			a	d	a	a	a	b	b	d	d	a	a,b,c,d	c	b	a	f		a	a	b	b	b	b	b	c	d	b	d	5	5	4	2	5
srock		3	b	a	a	a	a	a	a	a	b	a	a	a	e	b		a	e	a	a	a	a,b,c,d	c	f	f	a	a,b,c,d	a	a	a	f		a	a	a	b	a	c	b	b	a	a	c	5	5	3	5	5
srock		3	b	a	a	a	a	a	a	a	b	a	a	a	e	c		a	d	c	c	c	e	c	f	f	a	d	c	c	c	e	a	b	a	b	a	c	c	c	c	c	a	d	4	4	4	4	4
srock		3	b	a	a	a	a	a	a	a	b	a	a	a	e	c		a	d	c	c	c	e	c	f	f	a	d	c	c	c	e	a	c	a	b	a	c	c	c	c	c	a	d	4	4	4	4	4
srock		3	b	a	a	a	a	a	a	a	b	a	a	a	e	c		a	d	c	c	c	e	c	f	f	a	d	c	c	c	e	a	c	a	b	a	c	c	c	c	c	a	d	4	4	4	4	4
srock		3	b	a	a	a	a	a	a	a	a	a	a	a	g			a	e	a	a	a	b	a	f	e	a	b,c,d	c	a	c	f		a	a	b	a	c	c	b	c	d	b	c	4	4	3	3	5
srock		3	b	a	a	a	a	a	a	a	b	a	a	a	e	c		a	e	c	c	c	a,b	b	b	f	a	a,b,c,d	c	a	a	e	a	a	a	b	b	b	c	b	c	d	b	c	5	4	3	4	4
srock		3	b	a	a	a	a	a	a	a	b	a	a	a	e	a		a	e	a	a	a	b	a	e	e	a	abcd	a	a	c	f		a	a	a	b	a	b	b	b	d	c	d	5	5	3	5	5
srock		3	b	a	a	a	a	a	a	a	b	a	a	a	e	a		a	e	a	a	a	b	a	f	d	a	c,d	a	a	a	f		a	a	a	b	a	b	b	b	d	b	d	5	4	3	4	5
srock		3	b	a	a	a	a	a	a	a	b	a	a	a	c			a	e	a	c	c	e	c	a	a	a	a,b,c,d	c	a	a	g		a	a	a	b	a	b	b	b	d	a	d	4	3	3	3	4
srock		3	b	a	a	a	a	a	a	a	b	a	a	a	c			a	e	a	c	c	e	c	a	d	a	a,b,c,d	c	a	a	g		a	a	a	b	c	b	b	b	a	b	c	4	3	3	3	4
srock		3	b	a	a	a	a	a	a	a	b	a	a	a	e	c		a	e	c	c	c	e	a	f	f	a	a	c	c	c	e	b	c	a	b	a	b	b	b	b	d	b	d	5	5	5	5	5
srock		3	a	e	g	d	b	c	e	d	a	g	c	d	c			c		a	c	b	d	b	f	a	b			b	b	g		b	d	a	d	c	c	c	b	c	c	c	4	4	3	4	4
srock		3	a	e	g	d	g	h3	d	b	a	b	c	d	e	b	10	b	a	b	b	b	b	a	a	a	a	a	c	c	a	d	b	b	d	b	d	d	c	c	b	c	c	c	3	3	3	3	3
srock		3	a	d	g	d	b	e	b	d	a	d	e	d	c			c	b	b	b	a	b	a	a	a	a	a	a	b	c	a		e	a	b	b	b	b	c	a	d	c	b	4	4	4	4	4
srock		3	a	d	g	e	b	b	e	e	a	e	e	d	g			b	a	a	a	b	b	a	b	a	a	b	a	a	a	d	a	a	d	a	d	d	b	c	c	c	d	c	4	4	4	4	4
srock		3	a	d	g	d	g	h4	c	e	a	b	c	d	d				a	a	a	a	a	a	f	a	a	a,b	a	a	a	c		c	c	a	b	d	b	c	b	a	a	c	2	2	3	2	3
srock		3	a	d	g	d	b	e	b	d	a	d	e	d	c			c	b	b	b	a	b	a	a	a	a	a	a	b	c	a		e	a	b	b	b	b	c	a	d	c	b	4	4	4	4	4
srock		3	a	e	g	e	b	b	e	e	b	a	e	d	g			b	a	a	a	b	b	a	b	a	a	b	a	a	a	d	a	a	d	a	d	d	b	c	c	c	d	c	4	4	4	4	4
srock		2	a	e	f	d	b	e	c	d	a	e	c	d	e	b	3	d		c	c	b	b	a	c	a	c			b	b	d	a	b	d	a	d	d	c	c	b	c	d	c	4	4	2	4	4
srock		2	a	e	a	a	a	a	a	a	a	g	a	a	c			a	e	a	c	b	d	b	f	a	b			b	b	g		b	a	a	a	c	c	c	b	c	c	c	4	4	3	4	4
srock		2	a	e	a	a	a	a	a	a	a	e	a	a	e	b	3	a	e	c	c	b	b	a	c	a	c			b	b	d	a	b	a	a	a	d	c	c	b	c	d	c	4	4	2	4	4
srock		2	a	e	d	d	b	c	e	d	a	g	c	d	c			c		a	c	b	d	b	f	a	b			b	b	g		b	d	a	d	c	c	c	b	c	c	c	4	4	3	4	4
srock		2	a	e	g	d	g	h	d	b	a	b	c	d	e	b		b	a	b	b	b	b	a	a	a	a	a	c	c	a	d	b	b	d	b	d	d	c	c	b	c	c	c	3	3	3	3	3
srock		2	b	a	a	a	a	a	a	a	b	a	a	a	a			a	b	c	c	c	a	a	a	a	a	a	b	a	c	g		a	a	a	a	a	b	b	b	c	b	c	4	4	4	4	3
srock		2	b	a	a	a	a	a	a	a	b	a	a	a	e	c	20	a	d	c	c	c	e	c	f	f	a	d	c	c	c	e	a	c	a	b	a	c	c	c	c	c	a	d	4	4	4	4	4
srock		2	b	a	a	a	a	a	a	a	b	a	a	a	g			a	e	a	a	a	b	a	f	e	a	b,c,d	c	a	c	f		a	a	b	a	c	c	b	c	d	b	c	4	4	3	3	5
srock		2	b	a	a	a	a	a	a	a	b	a	a	a	e	c		a	e	c	c	c	a,b	b	b	f	a	a,b,c,d	c	a	a	e	a	a	a	b	b	b	c	b	c	d	b	c	5	4	3	4	4
srock		1	a	d	a	a	a	a	a	a	a	a	a	a	g			a	e	a	a	a	b	a	e	e	a	b	a	c	a	f		c	a	a	a	b	c	b	b	a	b	c	5	4	3	3	4
srock		1	a	d	a	a	a	a	a	a	a	b	a	a	e	b		a	a	c	c	c	e	b	a	c	a	d	b	b	b	f		b	a	b	a	d	c	c	b	c	c	c	4	2	2	2	4
srock		1	a	e	a	a	a	a	a	a	b	a	a	a	g			a	e	c	c	c	e	c	f	f	c			c	c	c		b	a	b	a	a	b	b	b	d	c	c	5	3	3	3	5
srock		1	b	a	a	a	a	a	a	a	b	a	a	a	d			a	e	a	a	a	a	a	e	f	a	c,d	c	c	c	e	a	d	a	b	a	a	c	c	a	d	b	d	5	4	4	4	5
srock		1	b	a	a	a	a	a	a	a	b	a	a	a	g			a	e	c	a	c	b	b	a	a	c			b	c	e	a	a	a	a	a	a	b	b	b	d	b	d	5	5	3	4	5
srock		1	b	a	a	a	a	a	a	a	b	a	a	a	e	b		a	e	c	c	c	b	c	a	a	a	a,c	c	c	c	f		a	a	a	a	a	b	b	b	d	b	d	5	5	3	5	5
srock		1	b	a	a	a	a	a	a	a	a	a	a	a	e	b	3	a	d	c	c	a	b	b	a	a	c			c	a	e	b	c	a	a	a	b	b	b	c	d	b	d	5	5	5	5	5
srock		1	b	a	a	a	a	a	a	a	b	a	a	a	d			a	e	a	a	a	a	a	e	a	a	a,c	a	c	c	c		a	a	a	a	a	b	b	a	a	a	a	5	5	4	5	5
srock		1	b	a	a	a	a	a	a	a	b	a	a	a	e	a		a	e	a	a	a	a	a	b	a	a	c	c	c	a	g		a	a	a	a	b	b	b	c	d	b	d	5	5	3	5	5
srock		1	b	a	a	a	a	a	a	a	a	b	a	a	e	c		a	c	c	a	c	b	a	a	c	a	c	c	b	c	e	a	a	a	a	b	b	b	b	b	d	a	d	5	5	5	5	5
srock		1	b	a	a	a	a	a	a	a	a	b	a	a	e	c		a	a	c	a	a	e	c	b	c	c			c	c	e	a	c	a	a	b	b	b	b	b	d	b	d	4	4	4	4	4
srock		1	b	a	a	a	a	a	a	a	b	a	a	a	e	a		a	e	a	a	a	a	a	b	a	a	c	c	c	a	g		a	a	a	a	b	b	b	c	d	b	d	5	5	3	5	5
czarnocin	gimnazjum	1	a	d	a	a	a	a	a	a	a	a	a	a	e	b		a	b	a	a	c	b	b	f	a	a	a,c,d	c	c	a	f		d	a	b	a	c	c	b	a	d	c	d	5	4	4	5	5
czarnocin	gimnazjum	1	a	d	b	b	d	e	b	b	b	a	e	f	e	c	10	a	a	a	a	a	a	a	d	a	a	a,b,c,d	a	b	a	e	a	a	b	a	a	c	b	b	c	d	b	b	5	3	5	5	5
czarnocin	gimnazjum	1	a	d	b	c	g	c	a	b	a	b	f	f	e	b			b	c	c	c	e	a	e	a	a	a,c,d	c	a	a	e	a	a	c	b	d	d	c	c	c	d	c	d	5	5	3	4	4
czarnocin	gimnazjum	1	a	c	a	a	a	a	a	a	b	a	a	a	a			a	a	a	a	b	a	b	b	a	a	b	a	a	a	b		a	a	a	a	a	a	b	b	c	d	c	5	4	3	3	4
czarnocin	gimnazjum	1	a	c	a	a	a	a	a	a	b	a	a	a	a			a	a	a	a	b	a	b	b	a	a	b	a	a	a	b		a	a	a	a	a	a	b	b	c	d	c	5	4	3	3	4
czarnocin	gimnazjum	1	a	c	a	a	a	a	a	a	b	a	a	a	a			a	a	a	a	b	a	b	b	a	a	b	a	a	a	b		a	a	a	a	a	a	b	b	c	d	c	5	4	3	3	4
czarnocin	gimnazjum	1	b	a	a	a	a	a	a	a	b	a	a	a	e	b		a	b	a	a	a	b	b	f	a	a	a,b,c,d	a	b	a	e	a	c	a	a	a	a	c	c	c	d	b	d	5	5	4	5	5
czarnocin	gimnazjum	1	b	a	a	a	a	a	a	a	b	a	a	a	e	b		a	b	a	a	a	b	b	f	a	a	a,b,c,d	a	b	a	e	a	c	a	a	a	a	c	c	c	d	b	d	5	5	4	5	5
czarnocin	gimnazjum	1	b	a	a	a	a	a	a	a	b	a	a	a	e	b		a	b	a	a	a	b	b	f	a	a	a,b,c,d	a	b	a	e	a	c	a	a	a	a	c	c	c	d	b	d	5	5	4	5	5
czarnocin	gimnazjum	1	b	a	a	a	a	a	a	a	a	a	a	a	e	c		a	e	a	a	c	b	a	a	f	c			c	c	e	a	d	a	b	c	c	b	b	a	d	c	a	5	1	2	3	5
czarnocin	gimnazjum	1	b	a	a	a	a	a	a	a	a	a	a	a	e	c		a	e	a	a	c	b	a	a	f	c			c	c	e	a	d	a	b	c	c	b	b	a	d	c	a	5	1	2	3	5
czarnocin	gimnazjum	1	b	a	a	a	a	a	a	a	b	a	a	a	e	b		a	e	a	a	a	b	a	e	a	a	c,d	b	a	c	e	a	a	a	a	a	b	b	b	b	d	c	d	4	2	3	4	5
czarnocin	gimnazjum	1	b	a	a	a	a	a	a	a	b	a	a	a	e	b		a	e	a	a	a	b	a	f	a	a	a	c	c	a	e	b	a	a	a	a	a	b	b	b	d	a	d	5	5	4	3	5
czarnocin	gimnazjum	1	b	a	a	a	a	a	a	a	b	a	a	a	e	b		a	b	a	a	a	b	b	f	a	a	a,b,c,d	a	b	a	e	a	c	a	a	a	a	c	c	c	d	b	d	5	5	4	5	5
czarnocin	gimnazjum	1	b	a	a	a	a	a	a	a	b	a	a	a	e	b		a	b	a	a	a	b	b	f	a	a	a,b,c,d	a	b	a	e	a	c	a	a	a	a	c	c	c	d	b	d	5	5	4	5	5
czarnocin	gimnazjum	1	b	a	a	a	a	a	a	a	b	a	a	a	e	b		a	b	a	a	a	b	b	f	a	a	a,b,c,d	a	b	a	e	a	c	a	a	a	a	c	c	c	d	b	d	5	5	4	5	5
czarnocin	gimnazjum	1	b	a	a	a	a	a	a	a	a	a	a	a	e	c		a	e	a	a	c	b	a	a	f	c			c	c	e	a	d	a	b	c	c	b	b	a	d	c	a	5	1	2	3	5
czarnocin	gimnazjum	1	b	a	a	a	a	a	a	a	a	a	a	a	e	c		a	e	a	a	c	b	a	a	f	c			c	c	e	a	d	a	b	c	c	b	b	a	d	c	a	5	1	2	3	5
czarnocin	gimnazjum	1	b	a	a	a	a	a	a	a	b	a	a	a	e	b		a	e	a	a	a	b	a	e	a	a	c,d	b	a	c	e	a	a	a	a	a	b	b	b	b	d	c	d	4	2	3	4	5
czarnocin	gimnazjum	1	b	a	a	a	a	a	a	a	b	a	a	a	e	b		a	e	a	a	a	b	a	f	a	a	a	c	c	a	e	b	a	a	a	a	a	b	b	b	d	a	d	5	5	4	3	5
czarnocin	gimnazjum	1	b	a	a	a	a	a	a	a	b	a	a	a	e	b		a	b	a	a	a	b	b	f	a	a	a,b,c,d	a	b	a	e	a	c	a	a	a	a	c	c	c	d	b	d	5	5	4	5	5
czarnocin	gimnazjum	1	b	a	a	a	a	a	a	a	a	a	a	a	e	b		a	b	a	a	a	b	b	f	a	a	a,b,c,d	a	b	a	e	a	c	a	a	a	a	c	c	c	d	b	d	5	5	4	5	5
czarnocin	gimnazjum	1	b	a	a	a	a	a	a	a	b	a	a	a	e	b		a	b	a	a	a	b	b	f	a	a	a,b,c,d	a	b	a	e	a	c	a	a	a	a	c	c	c	d	b	d	5	5	4	5	5
czarnocin	gimnazjum	1	b	a	a	a	a	a	a	a	a	a	a	a	e	c		a	e	a	a	c	b	a	a	f	c			c	c	e	a	d	a	b	c	c	b	b	a	d	c	a	5	1	2	3	5
czarnocin	gimnazjum	1	b	a	a	a	a	a	a	a	a	a	a	a	e	c		a	e	a	a	c	b	a	a	f	c			c	c	e	a	d	a	b	c	c	b	b	a	d	c	a	5	1	2	3	5
czarnocin	gimnazjum	1	b	a	a	a	a	a	a	a	b	a	a	a	e	b		a	e	a	a	a	b	a	e	a	a	c,d	b	a	c	e	a	a	a	a	a	b	b	b	b	d	c	d	4	2	3	4	5
czarnocin	gimnazjum	1	b	a	a	a	a	a	a	a	a	a	a	a	e	b		a	e	a	a	a	b	a	f	a	a	a	c	c	a	e	b	a	a	a	a	a	b	b	b	d	a	d	5	5	4	3	5
czarnocin	gimnazjum	1	a	c	a	a	a	a	a	a	b	a	a	a	d			a	a	a	b	a	b	b	a	a	b			a	b	d	a	a	a	a	a	a	b	b	c	d	c	d	4	3	3	4	4
czarnocin	gimnazjum	1	a	c	a	a	a	a	a	a	b	a	a	a	d			a	a	a	b	a	b	b	a	a	b			a	b	d	a	a	a	a	a	a	b	b	c	d	c	d	4	3	3	4	4
czarnocin	gimnazjum	1	a	c	a	a	a	a	a	a	a	a	a	a	d			a	a	a	b	a	b	b	a	a	b			a	b	d	a	a	a	a	a	a	b	b	c	d	c	d	4	3	3	4	4
czarnocin	gimnazjum	1	a	c	a	a	a	a	a	a	b	a	a	a	d			a	a	a	b	a	b	b	a	a	b			a	b	d	a	a	a	a	a	a	b	b	c	d	c	d	4	3	3	4	4
czarnocin	gimnazjum	1	a	c	a	a	a	a	a	a	a	a	a	a	d			a	a	a	b	a	b	b	a	a	b			a	b	d	a	a	a	a	a	a	b	b	c	d	c	d	4	3	3	4	4
czarnocin	gimnazjum	1	a	c	a	a	a	a	a	a	a	a	a	a	d			a	a	a	b	a	b	b	a	a	b			a	b	d	a	a	a	a	a	a	b	b	c	d	c	d	4	3	3	4	4
czarnocin	gimnazjum	1	a	c	a	a	a	a	a	a	b	a	a	a	d			a	a	a	b	a	b	b	a	a	b			a	b	d	a	a	a	a	a	a	b	b	c	d	c	d	4	3	3	4	4
czarnocin	gimnazjum	1	a	c	a	a	a	a	a	a	b	a	a	a	d			a	a	a	b	a	b	b	a	a	b			a	b	d	a	a	a	a	a	a	b	b	c	d	c	d	4	3	3	4	4
czarnocin	gimnazjum	1	a	d	e	d	b	h1	d	e	a	e	b	f	e	c		a	b	a	a	a	b	a	f	a	a	a,b,c,d	c	a	a	g		a	a	a	b	c	b	b	a	d	b	b	5	4	3	4	4
czarnocin	gimnazjum	1	a	e	a	a	a	a	a	a	a	b	a	a	e	a	16	a	e	a	a	c	a	a	c	d	a	c,d	a	b	c	e	a	a	a	a	a	d	b	b	c	d	b	d	5	3	4	4	5
czarnocin	gimnazjum	1	a	e	a	a	a	a	a	a	a	a	a	a	e	a	10	a	e	a	a	a	b	c	f	f	a	d	c	c	c	g		d	a	a	b	b	c	b	b	d	b	d	5	5	3	4	5
czarnocin	gimnazjum	1	a	e	a	a	a	a	a	a	b	a	a	a	e	a	5	a	e	a	a	a	b	c	e	e	a	a,b	a	c	a	e	a	a	a	a	a	c	c	c	c	c	b	c	1	1	1	1	1
czarnocin	gimnazjum	1	a	b	a	a	a	a	a	a	a	b	a	a	e	a		a	a	a	a	a	b	b	f	a	a	c	c	a	c	e	a	a	a	a	a	c	c	c	b	d	b	d	5	5	5	5	5
czarnocin	gimnazjum	1	a	e	f	d	c	c	a	a	a	b	g	b	b			a	b	b	a	a	b	a	b	b	a	a,c	b	a	a	a		a	b	a	b	b	b	a	a	a	a	b	5	4	4	3	3
czarnocin	gimnazjum	1	a	e	f	d	c	c	a	a	a	b	g	d	b			a	b	b	a	a	b	a	b	b	a	a,c	b	a	a	a		a	b	a	b	b	b	a	a	a	a	b	5	4	4	3	3
czarnocin	gimnazjum	1	a	d	e	d	b	h1	d	e	a	e	b	f	e	c		a	b	a	a	a	b	a	f	a	a	a,b,c,d	c	a	a	g		a	a	a	b	c	b	b	a	d	b	b	5	4	3	4	4
czarnocin	gimnazjum	1	a	e	e	d	c	g	d	e	a	d	f	f	e	c	3	d	e	c	c	c	e	c	a	a	a	a	b	b	b	e	a	b	d	b	d	d	a	a	b	c	c	a	3	3	3	3	3
czarnocin	gimnazjum	2	a	e	e	d	c	g	d	e	a	d	f	f	e	c	3	d	e	c	c	c	e	c	a	a	a	a	b	b	b	e	a	c	d	b	d	d	a	a	b	c	c	a	3	3	3	3	3
czarnocin	gimnazjum	2	a	e	e	d	c	g	d	e	a	d	f	f	e	c	3	d	e	c	c	c	e	c	a	a	a	a	b	b	b	e	a	b	d	b	d	d	a	a	b	c	c	a	3	3	3	3	3
czarnocin	gimnazjum	2	a	e	e	d	c	g	d	e	a	d	f	f	e	c	3	d	e	c	c	c	e	c	a	a	a	a	b	b	b	e	a	c	d	b	d	d	a	a	b	c	c	a	3	3	3	3	3
czarnocin	gimnazjum	2	a	e	b	b	f	c	a	a	a	a	e	b	e	a	16	a	e	a	a	c	a	a	c	d	a	c,d	a	b	c	e	a	a	c	a	b	d	b	b	c	d	b	d	5	3	4	4	5
czarnocin	gimnazjum	2	a	e	a	a	a	a	a	a	a	a	a	a	e	a	10	a	e	a	a	a	b	c	f	f	a	d	c	c	c	g		d	a	a	b	b	c	b	b	d	b	d	5	5	3	4	5
czarnocin	gimnazjum	2	a	e	b	b	c	b	a	b	b	a	e	f	e	a	5	a	e	a	a	a	b	c	e	e	a	a,b	a	c	a	e	a	a	c	a	c	c	c	c	c	c	b	c	1	1	1	1	1
czarnocin	gimnazjum	2	a	c	b	b	g	h16	a		b	a	b	f	e	b	10	a	e	c	c	c	e	a	a	a	b			b	c	c		d	b	b	b	d	c	c	c	d	b	d	4	2	3	3	4
czarnocin	gimnazjum	2	a	d	d	f	b	c	c	e	a	a	e	f	e	b			b	a	a	c	b	b	f	a	a	a,c,d	c	c	a	f		d	c	b	c	c	c	b	a	d	c	d	5	4	4	5	5
czarnocin	gimnazjum	2	a	d	a	a	a	a	a	a	b	a	a	a	e	c	10	a	a	a	a	a	a	a	d	a	a	a,b,c,d	a	b	a	e	a	a	b	a	a	c	b	b	c	d	b	b	5	3	5	5	5
czarnocin	gimnazjum	2	a	d	a	a	a	a	a	a	a	b	a	a	e	b	10	a	b	c	c	c	e	a	e	a	a	a,c,d	c	a	a	e	a	a	a	b	a	d	c	c	c	d	c	d	5	5	3	4	4
czarnocin	gimnazjum	2	a	e	d	f	b	c	c	e	a	a	e	f	e	b			b	a	a	c	b	b	f	a	a	a,c,d	c	c	a	f		d	c	b	c	c	c	b	a	d	c	d	5	4	4	5	5
czarnocin	gimnazjum	2	a	d	b	b	d	e	b	b	b	a	e	f	e	c	10	a	a	a	a	a	a	a	d	a	a	a,b,c,d	a	b	a	e	a	a	b	a	a	c	b	b	c	d	b	b	5	3	5	5	5
czarnocin	gimnazjum	2	a	e	a	a	a	a	a	a	a	a	a	a	d			a	c	b	b	b	d	b	e	a	a	b	a	a	a	c		a	a	b	a	d	a	a	b	a	d	a	1	1	1	1	1
czarnocin	gimnazjum	2	a	d	g	d	b	e	e	d	a	g	f	d	e	c		b		c	c	c	b,c	c	b	f	a	b	c	c	c	g		b	d	a	d	d	c	b	c	d	c	c	4	3	3	5	5
czarnocin	gimnazjum	2	b	a	a	a	a	a	a	a	b	a	a	a	e	b	15	a	b	b	b	b	b	b	f	b	a	c,d	a	c	c	e	b	a	a	a	a	a	b	b	b	d	a	d	5	5	4	3	5
czarnocin	gimnazjum	2	b	a	a	a	a	a	a	a	b	a	a	a	g			a	c	c	c	c	e	c	f	f	c			c	a	e	b	c	a	b	b	b	c	c	c	d	b	c	4	4	4	4	4
czarnocin	gimnazjum	2	b	a	a	a	a	a	a	a	b	a	a	a	g			a	c	c	c	c	e	c	f	f	c			c	a	e	b	c	a	b	b	b	c	c	c	d	b	c	4	4	4	4	4
czarnocin	gimnazjum	2	b	a	a	a	a	a	a	a	b	a	a	a	e	a		a	e	a	a	a	b	a	f	f	c			c	a	e	a	a	a	b	a	b	c	b	b	d	b	d	5	4	5	5	5
czarnocin	gimnazjum	2	b	a	a	a	a	a	a	a	b	a	a	a	c			a	e	a	a	a	c	a	f	f	a	c	a	a	a	d	a	a	a	a	a	a	c	c	c	d	a	d	4	4	4	4	4
czarnocin	gimnazjum	2	b	a	a	a	a	a	a	a	b	a	a	a	c			a	e	a	a	a	b	b	e	e	b			b	b	c		a	a	a	a	c	c	c	b	d	a	d	5	4	2	5	5
czarnocin	gimnazjum	2	b	a	a	a	a	a	a	a	b	a	a	a	e	a		a	e	a	a	a	b	a	f	c	a	a,c,d	a	a	a	e	a	a	a	a	a	a	b	b	c	d	b	d	5	5	5	5	5
czarnocin	gimnazjum	2	b	a	a	a	a	a	a	a	b	a	a	a	g			a	e	a	a	a	d	b	e	e	c			a	b	e	a	a	a	a	a	a	b	b	b	d	a	c	4	3	3	2	5
czarnocin	gimnazjum	2	b	a	a	a	a	a	a	a	b	a	a	a	e	a		a	e	a	a	a	b	a	e	d	a	a,c,d	a	a	a	e	a	a	a	a	a	c	c	b	b	d	b	d	5	5	4	5	5
czarnocin	gimnazjum	2	b	a	a	a	a	a	a	a	b	a	a	a	e	a		a	e	a	a	a	b	a	e	d	a	a,c,d	a	a	a	e	a	a	a	a	a	c	c	b	b	d	b	d	5	5	4	5	5
czarnocin	gimnazjum	2	b	a	a	a	a	a	a	a	b	a	a	a	e	b		a	e	a	a	a	b	a	f	f	a	a,b,d	a	a	c	c		a	a	a	a	a	c	b	b	d	b	c	4	4	3	4	5
czarnocin	gimnazjum	2	b	a	a	a	a	a	a	a	b	a	a	a	e	a		a	e	a	a	a	b	a	e	f	a	a,c,d	a	a	a	e	a	a	a	b	a	a	c	b	a	d	b	c	5	4	4	4	5
czarnocin	gimnazjum	2	b	a	a	a	a	a	a	a	b	a	a	a	c			a	e	a	a	a	b	a	e	d	a	a,b,c,d	a	a	a	c		a	a	a	a	a	b	b	c	d	a	d	5	5	5	5	5
czarnocin	gimnazjum	2	b	a	a	a	a	a	a	a	a	b	a	a	d			a	b	a	c	b	b	a	f	b	b			b	b	c		a	a	b	a	c	c	c	b	c	b	c	4	4	2	5	5
czarnocin	gimnazjum	3	b	a	a	a	a	a	a	a	b	a	a	a	e	c		a	e	a	a	a	a	a	d	d	a	c	c	a	a	d	a	b	a	a	a	a	b	b	c	d	a	d	5	5	4	5	5
czarnocin	gimnazjum	3	b	a	a	a	a	a	a	a	b	a	a	a	e	b	18	a	e	a	a	b	d	b	c	a	a	a	a	a	b	e	b	a	a	b	a	b	c	b	c	d	a	d	5	5	3	4	5
czarnocin	gimnazjum	3	b	a	a	a	a	a	a	a	b	a	a	a	g			a	e	c	c	c	d	a	e	b	a	c,d	c	a	c	d	a	a	a	b	a	a	c	c	b	d	c	d	5	5	4	5	5
czarnocin	gimnazjum	3	b	a	a	a	a	a	a	a	b	a	a	a	e	c		a	e	a	c	a	b	a	f	a	a	b,c	c	b	c	e	a	c	a	b	a	a	b	b	c	d	a	c	5	3	3	5	5
czarnocin	gimnazjum	3	b	a	a	a	a	a	a	a	a	b	a	a	e	c		a	b	a	a	a	a,b	c	f	c	a	a,b,c,d	a	a	a	c		a	a	a	a	b	b	b	b	d	a	d	5	5	3	4	5
czarnocin	gimnazjum	3	b	a	a	a	a	a	a	a	b	a	a	a	e	b	10	a	a	c	c	c	b	a	a	a	a	c	c	a	a	e	a	a	a	a	a	a	b	b	a	d	b	d	5	5	4	4	5
czarnocin	gimnazjum	3	b	a	a	a	a	a	a	a	b	a	a	a	e	c		a	e	a	a	a	a	a	d	d	a	c	c	a	a	d	a	b	a	a	a	a	b	b	c	d	a	d	5	5	4	5	5
czarnocin	gimnazjum	3	b	a	a	a	a	a	a	a	b	a	a	a	e	b	18	a	e	a	a	b	d	b	c	a	a	a	a	a	b	e	b	a	a	b	a	b	c	b	c	d	a	d	5	5	3	4	5
czarnocin	gimnazjum	3	b	a	a	a	a	a	a	a	b	a	a	a	g			a	e	c	c	c	d	a	e	b	a	c,d	c	a	c	d	a	a	a	b	a	a	c	c	b	d	c	d	5	5	4	5	5
czarnocin	gimnazjum	3	b	a	a	a	a	a	a	a	b	a	a	a	e	c		a	e	a	c	a	b	a	f	a	a	b,c	c	b	c	e	a	c	a	b	a	a	b	b	c	d	a	c	5	3	3	5	5
czarnocin	gimnazjum	3	b	a	a	a	a	a	a	a	b	a	a	a	e	a		a	e	a	a	a	b	a	f	f	c			c	a	e	a	a	a	b	a	b	c	b	b	d	b	d	5	4	5	5	5
czarnocin	gimnazjum	3	b	a	a	a	a	a	a	a	b	a	a	a	c			a	e	a	a	a	c	a	f	f	a	c	a	a	a	d	a	a	a	a	a	a	c	c	c	d	a	d	4	4	4	4	4
czarnocin	gimnazjum	3	b	a	a	a	a	a	a	a	b	a	a	a	c			a	e	a	a	a	b	b	e	e	b			b	b	c		a	a	a	a	c	c	c	b	d	a	d	5	4	2	5	5
czarnocin	gimnazjum	3	b	a	a	a	a	a	a	a	b	a	a	a	e	a		a	e	a	a	a	b	a	f	c	a	a,c,d	a	a	a	e	a	a	a	a	a	a	b	b	c	d	b	d	5	5	5	5	5
czarnocin	gimnazjum	3	b	a	a	a	a	a	a	a	b	a	a	a	e	c		a	e	a	a	a	a,b	a	f	f	c			a	a	e	d	a	a	b	a	b	c	b	b	d	b	d	5	4	4	5	5
czarnocin	gimnazjum	3	b	a	a	a	a	a	a	a	b	a	a	a	b			a	e	a	a	a	e	a	e	f	c			c	a	b		a	a	a	a	a	c	c	c	d	b	d	3	3	3	3	3
czarnocin	gimnazjum	3	b	a	a	a	a	a	a	a	b	a	a	a	e	b	15	a	b	b	b	b	b	b	f	b	a	c,d	a	c	c	e	b	a	a	a	a	a	b	b	b	d	a	d	5	5	4	3	5
czarnocin	gimnazjum	3	b	a	a	a	a	a	a	a	b	a	a	a	g			a	c	c	c	c	e	c	f	f	c			c	a	e	b	c	a	b	b	b	c	c	c	d	b	c	4	4	4	4	4
czarnocin	gimnazjum	3	b	a	a	a	a	a	a	a	b	a	a	a	g			a	c	c	c	c	e	c	f	f	c			c	a	e	b	c	a	b	b	b	c	c	c	d	b	c	4	4	4	4	4
czarnocin	gimnazjum	3	a	d	e	b	c	b	e	c	a	a	c	d	e	b		b	a	c	c	c	b	b	a	a	a	c,d	b	a	a	d	a	a	c	b	d	d	c	c	c	c	b	a	4	1	1	1	5
czarnocin	gimnazjum	3	a	d	a	a	a	a	a	a	a	a	a	a	e	b	18	a	d	a	a	c	b	c	f	a	a	a,c,d	c	c	a	d	a	a	a	a	a	c	c	c	b	d	b	c	5	4	3	4	5
czarnocin	gimnazjum	3	a	e	a	a	a	a	a	a	a	a	a	a	e	b		a	b	a	a	a	b	a	b	b	a	a,c,d	a	a	a	e	a	a	a	b	a	c	b	b	a	d	b	c	4	3	3	5	5
czarnocin	gimnazjum	3	a	e	a	a	a	a	a	a	a	a	a	a	e	c		a	e	c	c	c	e	b	e	d	a	a,b,c,d	a	c	c	e	b	a	a	b	a	d	b	b	b	c	b	b	3	4	3	4	4
czarnocin	gimnazjum	3	a	e	a	a	a	a	a	a	b	a	a	a	c			a	d	c	c	c	b	a	b	a	c			a	c	e	a	d	a	b	a	b	b	b	c	d	b	d	5	5	3	3	5
czarnocin	gimnazjum	3	a	e	a	a	a	a	a	a	b	a	a	a	e	c		a	b	a	a	a	a	a	a	a	a	a,b,c	a	b	b	g		c	a	a	a	a	b	b	b	d	a	c	3	5	2	5	5
czarnocin	gimnazjum	3	a	e	b	c	d	e	b	a	a	a	c	f	e	b		a	b	a	a	a	b	a	b	b	a	a,c,d	a	a	a	e	a	a	b	b	c	c	b	b	a	d	b	c	4	3	3	5	5
czarnocin	gimnazjum	3	a	e	a	a	a	a	a	a	a	a	a	a	e	c		a	e	c	c	c	e	b	e	d	a	a,b,c,d	a	c	c	e	b	a	a	b	a	d	b	b	b	c	b	b	3	4	3	4	4
czarnocin	gimnazjum	3	a	e	a	a	a	a	a	a	b	a	a	a	c			a	d	c	c	c	b	a	b	a	c			a	c	e	a	d	a	b	a	b	b	b	c	d	b	d	5	5	3	3	5
czarnocin	gimnazjum	3	a	e	a	a	a	a	a	a	b	a	a	a	e	c		a	b	c	c	c	b	a	f	b	a	b,c,d	a	c	c	e	a	a	a	a	a	d	c	a	c	d	c	c	4	4	4	4	4
czarnocin	gimnazjum	3	a	e	a	a	a	a	a	a	b	a	a	a	e	a		a	d	c	c	c	e	a	e	a	a	b,c,d	a	a	c	e	a	c	a	b	a	b	b	b	b	d	b	d	5	4	5	4	5
czarnocin	gimnazjum	3	a	e	e	d	c	g	d	e	a	d	f	f	e	c	3	d	e	c	c	c	e	c	a	a	a	a	b	b	b	e	a	b	d	b	d	d	a	a	b	c	c	a	3	3	3	3	3
czarnocin	gimnazjum	3	a	e	e	d	c	g	d	e	a	d	f	f	e	c	3	d	e	c	c	c	e	c	a	a	a	a	b	b	b	e	a	b	d	b	d	d	a	a	b	c	c	a	3	3	3	3	3
czarnocin	gimnazjum	3	a	e	e	d	c	g	d	e	a	d	f	f	e	c	3	d	e	c	c	c	e	c	a	a	a	a	b	b	b	e	a	b	d	b	d	d	a	a	b	c	c	a	3	3	3	3	3
czarnocin	gimnazjum	3	a	e	a	a	a	a	a	a	a	a	a	a	g			a	b	a	a	c	e	c	f	f	c			c	c	g		a	a	a	a	c	b	b	c	d	b	a	5	2	5	5	5
czarnocin	gimnazjum	3	a	e	a	a	a	a	a	a	a	a	a	a	e	a		a	e	c	c	c	e	c	f	f	c			c	c	d	d	a	a	a	c	c	b	b	c	d	d	d	5	5	5	4	5
czarnocin	gimnazjum	3	a	e	b	b	b	b	e	e	a	a	b	f	e	c		a	b	a	a	a	b	a	f	a	a	a,b,c,d	c	a	a	g		a	a	a	b	c	b	b	a	d	b	b	5	4	3	4	5
czarnocin	gimnazjum	3	a	e	e	d	b	h1	d	e	a	e	b	f	e	c		a	b	a	a	a	b	a	f	a	a	a,b,c,d	c	a	a	g		a	a	a	b	c	b	b	a	d	b	b	5	4	3	4	4
czarnocin	gimnazjum	3	a	e	a	a	a	a	a	a	b	a	a	a	d			a	e	a	c	a	a	a	b	f	a	a,b,c,d	a	a	c	g		c	b	a	a	c	b	b	b	d	b	d	4	4	3	4	5
czarnocin	gimnazjum	3	a	e	a	a	a	a	a	a	b	a	a	a	e	b		a	c	c	c	c	e	b	e	b	a	a,c,e4	a	a	a	e	a	d	a	a	a	a	b	b	c	d	c	c	4	4	4	4	4
czarnocin	gimnazjum	3	a	e	a	a	a	a	a	a	b	a	a	a	e	c	2	a	d	a	a	a	b	c	f	f	a	c	c	c	c	e	a	a	a	a	b	b	c	c	a	d	c	b	4	3	2	4	4
czarnocin	gimnazjum	3	a	e	a	a	a	a	a	a	b	a	a	a	e	b		a	b	a	a	a	e	a	f	a	a	c	c	a	c	e	a	a	a	b	a	c	b	b	b	c	b	c	4	4	3	4	5
czarnocin	gimnazjum	3	a	e	a	a	a	a	a	a	a	c	a	a	e	b	18	a	a	a	a	a	a	a	e	a	a	c	c	a	a	c		a	a	a	a	c	c	b	b	d	c	d	5	3	5	5	5
czarnocin	gimnazjum	3	a	e	a	a	a	a	a	a	a	a	a	a	e	b	2	a	b	a	c	a	a	a	c	f	b			c	c	c		c	a	b	a	b	b	b	a	d	c	d	4	4	4	4	4
czarnocin	gimnazjum	3	a	e	a	a	a	a	a	a	b	a	a	a	c			a	e	a	c	c	e	c	f	f	a	a,b,c,d	c	c	c	c		a	a	a	a	a	c	b	c	d	b	d	4	4	3	4	4
czarnocin	gimnazjum	3	a	d	g	d	c	e	e	e	a	c	e	f	e	b	18	b	a	a	a	a	a	a	e	a	a	c	c	a	a	c		a	c	a	d	c	c	b	b	d	c	d	5	3	5	5	5
czarnocin	gimnazjum	3	a	e	g	b	b	b	e	a	a	a	b	b	c			a	d	a	c	c	e	c	f	d	c			a	a	d	a	a	b	b	c	c	c	b	b	d	b	d	1	1	1	1	1
czarnocin	gimnazjum	3	a	d	g	d	c	e	e	e	a	c	e	f	e	b	18	b	a	a	a	a	a	a	e	a	a	c	c	a	a	c		a	c	a	d	c	c	b	b	d	c	d	5	3	5	5	5
czarnocin	gimnazjum	3	a	e	f	d	g	b	e	e	a	b	g11	f	e	c			b	c	c	c	b	a	f	b	a	b,c,d	a	c	c	e	a	a	b	a	c	d	c	a	c	d	c	c	4	4	4	4	4
czarnocin	gimnazjum	3	a	e	b	c	d	e	b	a	a	a	c	f	e	b		a	b	a	a	a	b	a	b	b	a	a,c,d	a	a	a	e	a	a	b	b	c	c	b	b	a	d	b	c	4	3	3	5	5
czarnocin	gimnazjum	3	a	e	b	b	b	b	e	e	a	a	b	f	g			a	b	a	a	c	e	c	f	f	c			c	c	g		a	b	a	c	c	b	b	c	d	b	a	5	2	5	5	5
czarnocin	gimnazjum	3	a	e	a	a	a	a	a	a	a	a	a	a	e	a		a	e	c	c	c	e	c	f	f	c			c	c	d	d	a	a	a	c	c	b	b	c	d	d	d	5	5	5	4	5
Gorzkowice	gimnazjum	3	a	e	e	c	b	h4	c	c	a	b	g	f	e	c	18	a	d	a	a	c	b	a	f	a	b			b	a	c		a	c	a	c	c	b	b	c	c	c	d	3	3	1	2	5
Gorzkowice	gimnazjum	3	a	f	a	a	a	a	a	a	a	a	a	a	g			a	b	a	a	c	e	c	f	f	c			c	c	g		a	a	a	a	c	b	b	c	d	b	a	5	2	5	5	5
Gorzkowice	gimnazjum	3	a	f	a	a	a	a	a	a	a	a	a	a	e	c		a	b	a	a	a	b	a	f	a	a	a,b,c,d	c	a	a	g		a	a	a	b	c	b	b	a	d	b	b	5	4	3	4	5
Gorzkowice	gimnazjum	3	a	d	e	d	b	h1	d	e	a	e	b	f	e	c		a	b	a	a	a	b	a	f	a	a	a,b,c,d	c	a	a	g		a	a	a	b	c	b	b	a	d	b	b	5	4	3	4	4
Gorzkowice	gimnazjum	3	a	f	c	c	b	c	b	b	a	b	d	c	f			b	b	b	a	b	a	c	e	e	a	e	b	a	c	a		e	a	a	c	d	c	a	a	c	a	a	3	4	2	2	1
Gorzkowice	gimnazjum	3	a	e	b	b	b	h	c	c	a	e	f	e	g			b	d	c	c	c	e	b	a	a	a	a,c	b	c	c	g		b	c	b	d	b	a	a	b	b	c	c	3	3	3	3	3
Gorzkowice	gimnazjum	3	a	f	a	a	a	a	a	a	a	b	a	a	f			a	b	b	a	b	a	c	e	e	a	e	b	a	c	a		c	a	a	c	d	c	a	a	c	a	a	3	4	2	2	1
Gorzkowice	gimnazjum	3	a	e	a	a	a	a	a	a	a	e	a	a	g			a	d	c	c	c	e	b	a	a	a	a,c	b	c	c	g		b	a	b	a	b	a	a	b	b	c	c	3	3	3	3	3
Gorzkowice	gimnazjum	3	a	f	c	c	b	c	b	b	a	b	d	c	f			b	b	b	a	b	a	c	e	e	a	e	b	a	c	a		e	a	a	c	d	c	a	a	c	a	a	3	4	2	2	1
Gorzkowice	gimnazjum	3	a	e	b	b	b	h15	c	c	a	e	f	e	g			b	d	c	c	c	e	b	a	a	a	a,c	b	c	c	g		b	c	b	d	b	a	a	b	b	c	c	3	3	3	3	3
Gorzkowice	gimnazjum	3	a	f	a	a	a	a	a	a	a	b	a	a	f			a	b	b	a	b	a	c	e	e	a	e	b	a	c	a		c	a	a	c	d	c	a	a	c	a	a	3	4	2	2	1
Gorzkowice	gimnazjum	3	a	e	a	a	a	a	a	a	a	e	a	a	g			a	d	c	c	c	e	b	a	a	a	a,c	b	c	c	g		b	c	b	d	b	a	a	b	b	c	c	3	3	3	3	3
Gorzkowice	gimnazjum	3	a	e	g	d	c	g	d	e	a	d	f	f	e	c	3	d	e	c	c	c	e	c	a	a	a	a	b	b	b	e	a	b	d	b	d	d	a	a	b	c	c	a	3	3	3	3	3
Gorzkowice	gimnazjum	3	a	e	g	d	c	g	d	e	a	d	f	f	e	c	3	d	e	c	c	c	e	c	a	a	a	a	b	b	b	e	a	b	d	b	d	d	a	a	b	c	c	a	3	3	3	3	3
Gorzkowice	gimnazjum	3	a	e	g	d	c	g	d	e	a	d	f	f	e	c	3	d	e	c	c	c	e	c	a	a	a	a	b	b	b	e	d	b	d	b	d	d	a	a	b	c	c	a	3	3	3	3	3
Gorzkowice	gimnazjum	3	a	e	g	d	c	g	d	e	a	d	f	f	e	c	3	d	e	c	c	c	e	c	a	a	a	a	b	b	b	e	a	b	d	b	d	d	a	a	b	c	c	a	3	3	3	3	3
Gorzkowice	gimnazjum	3	a	c	g	e	b	e	e	e	b	a	b	f	e	b		b	c	c	c	c	e	b	a	a	a	d,e1	a	c	c	e	b	b	c	a	d	b	c	b	b	d	c	c	4	4	4	5	5
Gorzkowice	gimnazjum	3	a	c	a	a	a	a	a	a	a	a	a	a	e	b		a	c	c	c	c	e	b	a	a	a	d,e1	a	c	c	e	b	b	c	a	d	b	c	b	b	d	c	c	4	4	4	5	5
Gorzkowice	gimnazjum	3	a	c	a	a	a	a	a	a	b	a	a	a	e	b		a	c	c	c	c	e	b	a	a	a	d,e1	a	c	c	e	b	b	c	a	d	b	c	b	b	d	c	c	4	4	4	5	5
Gorzkowice	gimnazjum	3	a	c	g	e	b	e	e	e	a	a	b	f	e	b		b	c	c	c	c	e	b	a	a	a	d,e1	a	c	c	e	b	b	c	a	d	b	c	b	b	d	c	c	4	4	4	5	5
Gorzkowice	gimnazjum	3	a	e	e	c	b	h4	c	c	a	b	g	f	e	c	18	a	d	a	a	c	b	a	f	a	b			b	a	c		a	c	a	c	c	b	b	c	c	c	d	3	3	1	2	5
Gorzkowice	gimnazjum	3	a	f	b	b	b	b	e	e	a	a	b	f	g			a	b	a	a	c	e	c	f	f	c			c	c	g		a	b	a	c	c	b	b	c	d	b	a	5	2	5	5	5
Gorzkowice	gimnazjum	3	a	f	b	b	b	b	e	e	a	a	b	f	e	c		a	b	a	a	a	b	a	f	a	a	a,b,c,d	c	a	a	g		a	a	a	b	c	b	b	a	d	b	b	5	4	3	4	5
Gorzkowice	gimnazjum	3	a	d	e	d	b	h1	d	e	a	e	b	f	e	c		a	b	a	a	a	b	a	f	a	a	a,b,c,d	c	a	a	g		a	a	a	b	c	b	b	a	d	b	b	5	4	3	4	4
Gorzkowice	gimnazjum	3	a	f	a	a	a	a	a	a	a	b	a	a	f			a	b	b	a	b	a	c	e	e	a	e	b	a	c	a		c	a	a	c	d	c	a	a	c	a	a	3	4	2	2	1
Gorzkowice	gimnazjum	3	a	e	b	b	b	h	c	c	a	e	f	e	g			b	d	c	c	c	e	b	a	a	a	a,c	b	c	c	g		b	c	b	d	b	a	a	b	b	c	c	3	3	3	3	3
Gorzkowice	gimnazjum	3	a	f	a	a	a	a	a	a	a	b	a	a	f			a	b	b	a	b	a	c	e	e	a	e	b	a	c	a		c	a	a	c	d	c	a	a	c	a	a	3	4	2	2	1
Gorzkowice	gimnazjum	3	a	e	a	a	a	a	a	a	a	e	a	a	g			a	d	c	c	c	e	b	a	a	a	a,c	b	c	c	g		b	c	b	d	b	a	a	b	b	c	c	3	3	3	3	3
Gorzkowice	gimnazjum	3	a	f	c	c	b	c	b	b	a	b	d	c	f			b	b	b	a	b	a	c	e	e	a	e	b	a	c	a		e	a	a	c	d	c	a	a	c	a	a	3	4	2	2	1
Gorzkowice	gimnazjum	3	a	e	b	b	b	h15	c	c	a	e	f	e	g			b	d	c	c	c	e	b	a	a	a	a,c	b	c	c	g		b	c	b	d	b	a	a	b	b	c	c	3	3	3	3	3
Gorzkowice	gimnazjum	3	a	f	c	c	b	c	b	b	a	b	d	c	f			b	b	b	a	b	a	c	e	e	a	e	b	a	c	a		e	a	a	c	d	c	a	a	c	a	a	3	4	2	2	1
Gorzkowice	gimnazjum	3	a	e	a	a	a	a	a	a	a	e	a	a	g			a	d	c	c	c	e	b	a	a	a	a,c	b	c	c	g		b	c	b	d	b	a	a	b	b	c	c	3	3	3	3	3
Gorzkowice	gimnazjum	3	a	f	b	c	d	e	b	a	a	a	c	f	e	b		a	b	a	a	a	b	a	b	b	a	a,c,d	a	a	a	e	a	a	b	b	c	c	b	b	a	d	b	c	4	3	3	5	5
Gorzkowice	gimnazjum	3	a	c	e	e	b	e	e	e	b	a	b	f	e	b		b	c	c	c	c	e	b	a	a	a	d,e1	a	c	c	e	b	b	c	a	d	b	c	b	b	d	c	c	4	4	4	5	5
Gorzkowice	gimnazjum	3	a	c	a	a	a	a	a	a	b	a	a	a	e	b		a	c	c	c	c	e	b	a	a	a	d,e1	a	c	c	e	b	b	c	a	d	b	c	b	b	d	c	c	4	4	4	5	5
Gorzkowice	gimnazjum	3	a	f	b	b	d	g	a	a	a	c	d	f	f			a	a	c	c	a	d	b	a	a	b			b	b	f		b	c	a	c	c	c	c	c	d	b	c	5	4	3	3	4
Gorzkowice	gimnazjum	3	a	d	e	b	c	b	e	c	a	a	c	d	e	b		b	a	c	c	c	b	b	a	a	a	c,d	b	a	a	d	a	a	c	b	d	d	c	c	c	c	b	a	4	1	1	1	5
Gorzkowice	gimnazjum	3	a	f	b	b	d	g	a	a	a	c	d	f	f			a	a	c	c	a	d	b	a	a	b			b	b	f		b	c	a	c	c	c	c	c	d	b	c	5	4	3	3	4
Gorzkowice	gimnazjum	3	a	d	e	b	c	b	e	c	a	a	c	d	e	b		b	a	c	c	c	b	b	a	a	a	c,d	b	a	a	d	a	a	c	b	d	d	c	c	c	c	b	a	4	1	1	1	5
Gorzkowice	gimnazjum	3	a	f	a	a	a	a	a	a	a	a	a	a	e	b		a	b	a	a	a	b	a	b	b	a	a,c,d	a	a	a	e	a	a	a	b	a	c	b	b	a	d	b	c	4	3	3	5	5
Gorzkowice	gimnazjum	3	a	f	b	c	d	e	b	a	a	a	c	f	e	b		a	b	a	a	a	b	a	b	b	a	a,c,d	a	a	a	e	a	a	b	b	c	c	b	b	a	d	b	c	4	3	3	5	5
Gorzkowice	gimnazjum	3	a	e	f	d	g	b	e	e	a	b	g11	f	e	c			b	c	c	c	b	a	f	b	a	b,c,d	a	c	c	e	a	a	b	a	c	d	c	a	c	d	c	c	4	4	4	4	4
Gorzkowice	gimnazjum	3	a	f	a	a	a	a	a	a	a	a	a	a	e	b		a	b	a	a	a	b	a	b	b	a	a,c,d	a	a	a	e	a	a	a	b	a	c	b	b	a	d	b	c	4	3	3	5	5
Gorzkowice	gimnazjum	3	a	f	b	b	d	g	a	a	a	c	d	f	f			a	a	c	c	a	d	b	a	a	b			b	b	f		b	c	a	c	c	c	c	c	d	b	c	5	4	3	3	4
Gorzkowice	gimnazjum	3	a	d	e	b	c	b	e	c	a	a	c	d	e	b		b	a	c	c	c	b	b	a	a	a	c,d	b	a	a	d	a	a	c	b	d	d	c	c	c	c	b	a	4	1	1	1	5
Gorzkowice	gimnazjum	3	a	f	a	a	a	a	a	a	a	a	a	a	e	b		a	b	a	a	a	b	a	b	b	a	a,c,d	a	a	a	e	a	a	a	b	a	c	b	b	a	d	b	c	4	3	3	5	5
Gorzkowice	gimnazjum	3	a	c	a	a	a	a	a	a	b	a	a	a	e	b		a	c	c	c	c	e	b	a	a	a	d,e1	a	c	c	e	b	b	c	a	d	b	c	b	b	d	c	c	4	4	4	5	5
Gorzkowice	gimnazjum	3	a	c	e	e	b	e	e	e	b	a	b	f	e	b		b	c	c	c	c	e	b	a	a	a	d,e1	a	c	c	e	b	b	c	a	d	b	c	b	b	d	c	c	4	4	4	5	5
Gorzkowice	gimnazjum	3	a	f	b	b	d	g	a	a	a	c	d	f	f			a	a	c	c	a	d	b	a	a	b			b	b	f		b	c	a	c	c	c	c	c	d	b	c	5	4	3	3	4
Gorzkowice	gimnazjum	3	a	d	e	b	c	b	e	c	a	a	c	d	e	b		b	a	c	c	c	b	b	a	a	a	c,d	b	a	a	d	a	a	c	b	d	d	c	c	c	c	b	a	4	1	1	1	5
Gorzkowice	gimnazjum	3	a	f	b	b	d	g	a	a	a	c	d	f	f			a	a	c	c	a	d	b	a	a	b			b	b	f		b	c	a	c	c	c	c	c	d	b	c	5	4	3	3	4
Gorzkowice	gimnazjum	3	a	d	a	a	a	a	a	a	a	a	a	a	e	b		a	a	c	c	c	b	b	a	a	a	c,d	b	a	a	d	a	a	a	b	a	d	c	c	c	c	b	a	4	1	1	1	5
Gorzkowice	gimnazjum	3	a	f	b	c	d	e	b	a	a	a	c	f	e	b		a	b	a	a	a	b	a	b	b	a	a,c,d	a	a	a	e	a	a	b	b	c	c	b	b	a	d	b	c	4	3	3	5	5
Gorzkowice	gimnazjum	3	a	f	b	c	d	e	b	a	a	a	c	f	e	b		a	b	a	a	a	b	a	b	b	a	a,c,d	a	a	a	e	a	a	b	b	c	c	b	b	a	d	b	c	4	3	3	5	5
Gorzkowice	gimnazjum	3	a	e	f	d	g	b	e	e	a	b	g11	f	e	c			b	c	c	c	b	a	f	b	a	b,c,d	a	c	c	e	a	a	b	a	c	d	c	a	c	d	c	c	4	4	4	4	4
Gorzkowice	gimnazjum	3	a	f	a	a	a	a	a	a	a	a	a	a	e	b		a	b	a	a	a	b	a	b	b	a	a,c,d	a	a	a	e	a	a	a	b	a	c	b	b	a	d	b	c	4	3	3	5	5
Gorzkowice	gimnazjum	3	a	f	b	b	d	g	a	a	a	c	d	f	f			a	a	c	c	a	d	b	a	a	b			b	b	f		b	c	a	c	c	c	c	c	d	b	c	5	4	3	3	4
Gorzkowice	gimnazjum	3	a	d	a	a	a	a	a	a	a	a	a	a	e	b		a	a	c	c	c	b	b	a	a	a	c,d	b	a	a	d	a	a	a	b	a	d	c	c	c	c	b	a	4	1	1	1	5
Gorzkowice	gimnazjum	3	b	a	a	a	a	a	a	a	b	a	a	a	g			a	e	a	a	a	d	b	e	e	c			a	b	e	a	a	a	a	a	a	b	b	b	d	a	c	4	3	3	2	5
Gorzkowice	gimnazjum	3	b	a	a	a	a	a	a	a	b	a	a	a	e	a		a	e	a	a	a	b	a	e	d	a	a,c,d	a	a	a	e	a	a	a	a	a	c	c	b	b	d	b	d	5	5	4	5	5
Gorzkowice	gimnazjum	3	b	a	a	a	a	a	a	a	b	a	a	a	e	a		a	e	a	a	a	b	a	e	d	a	a,c,d	a	a	a	e	a	a	a	a	a	c	c	b	b	d	b	d	5	5	4	5	5
Gorzkowice	gimnazjum	3	b	a	a	a	a	a	a	a	b	a	a	a	e	b		a	e	a	a	a	b	a	f	f	a	a,b,d	a	a	c	c		a	a	a	a	a	c	b	b	d	b	c	4	4	3	4	5
Gorzkowice	gimnazjum	3	b	a	a	a	a	a	a	a	b	a	a	a	e	a		a	e	a	a	a	b	a	e	f	a	a,c,d	a	a	a	e	a	a	a	b	a	a	c	b	a	d	b	c	5	4	4	4	5
Gorzkowice	gimnazjum	3	b	a	a	a	a	a	a	a	b	a	a	a	c			a	e	a	a	a	b	a	e	d	a	a,b,c,d	a	a	a	c		a	a	a	a	a	b	b	c	d	a	d	5	5	5	5	5
Gorzkowice	gimnazjum	3	b	a	a	a	a	a	a	a	a	b	a	a	d			a	b	a	c	b	b	a	f	b	b			b	b	c		a	a	b	a	c	c	c	b	c	b	c	4	4	2	5	5
Gorzkowice	gimnazjum	3	a	c	a	a	a	a	a	a	b	a	a	a	d			a	b	a	c	c	b	a	f	b	b			c	a	c		a	a	b	a	c	c	b	c	d	b	c	5	4	4	5	4
Gorzkowice	gimnazjum	3	b	a	a	a	a	a	a	a	b	a	a	a	b			a	c	a	b	c	b	a	a	b	b			a	c	b		d	a	a	c	b	a	b	c	b	b	d	5	5	5	5	5
Gorzkowice	gimnazjum	3	a	f	a	a	a	a	a	a	a	a	a	a	e	c		a	e	c	c	c	e	b	e	d	a	a,b,c,d	a	c	c	e	b	a	a	b	a	d	b	b	b	c	b	b	3	4	3	4	4
Gorzkowice	gimnazjum	3	b	a	a	a	a	a	a	a	b	a	a	a	b			a	e	a	a	a	e	a	e	f	c			c	a	b		c	a	a	a	b	b	b	b	d	a	a	3	3	3	3	3
Gorzkowice	gimnazjum	3	b	a	a	a	a	a	a	a	b	a	a	a	b			a	e	a	a	a	e	a	f	f	c			a	a	b		c	a	a	a	b	b	b	b	d	a	a	3	3	3	3	3
Gorzkowice	gimnazjum	3	b	a	a	a	a	a	a	a	b	a	a	a	e	a		a	e	a	a	a	e	a	e	f	a	a,b,c,d	a	c	a	e	a	c	a	a	a	d	c	c	b	c	b	a	4	3	2	1	1
Gorzkowice	gimnazjum	3	b	a	a	a	a	a	a	a	b	a	a	a	g			a	e	c	c	c	e	a	f	f	c			c	a	g		a	a	a	a	a	b	b	c	d	a	d	5	3	3	4	5
Gorzkowice	gimnazjum	3	a	f	a	a	a	a	a	a	b	a	a	a	e	c		a	b	a	a	a	a	a	a	a	a	a,b,c	a	b	b	g		c	a	a	a	a	b	b	b	d	a	c	3	5	2	5	5
Gorzkowice	gimnazjum	3	b	a	a	a	a	a	a	a	a	b	a	a	e	b	5	a	d	a	a	a	b	c	a	a	a	a,b,c,d	b	c	c	g		a	a	b	a	b	c	b	b	c	c	c	4	3	3	4	4
Gorzkowice	gimnazjum	3	a	c	a	a	a	a	a	a	a	a	a	a	e	b		a	b	c	b	a	d	b	a	a	a	a,c	a	a	b	c		a	a	b	a	d	a	b	a	d	b	c	1	5	5	1	3
Gorzkowice	gimnazjum	3	a	d	a	a	a	a	a	a	a	a	a	a	e	b	18	a	d	a	a	c	b	c	f	a	a	a,c,d	c	c	a	d	a	a	a	a	a	c	c	c	b	d	b	c	5	4	3	4	5
Gorzkowice	gimnazjum	3	b	a	a	a	a	a	a	a	b	a	a	a	e	b		a	e	a	a	a	b,c	c	f	a	a	a,b,c,d	a	a	b	c		c	a	b	a	a	b	b	c	a	b	d	5	4	4	5	5
Gorzkowice	gimnazjum	3	a	c	a	a	a	a	a	a	a	a	a	a	e	b		a	b	c	b	a	d	b	a	a	a	a,c	a	a	b	c		a	a	b	a	d	a	b	a	d	b	c	1	5	5	1	3
Gorzkowice	gimnazjum	3	a	d	a	a	a	a	a	a	a	a	a	a	e	b	3	a	a	b	b	b	b	a	a	a	a	c,d	a	b	b	c		c	a	a	a	c	b	b	b	d	b	c	5	5	4	5	5
Gorzkowice	gimnazjum	3	a	f	a	a	a	a	a	a	b	a	a	a	e	c	20	a	e	b	b	b	b	b	f	f	c			c	b	c		a	a	a	a	b	c	b	c	d	a	c	4	3	3	3	5
Gorzkowice	gimnazjum	3	b	a	a	a	a	a	a	a	b	a	a	a	e	a		a	e	a	a	a	b	a	f	f	c			c	a	e	a	a	a	b	a	b	c	b	b	d	b	d	5	4	5	5	5
Gorzkowice	gimnazjum	3	a	f	a	a	a	a	a	a	a	a	a	a	e	a		a	e	c	c	c	e	c	f	f	c			c	c	d	d	a	a	a	c	c	b	b	c	d	d	d	5	5	5	4	5
Gorzkowice	gimnazjum	3	b	a	a	a	a	a	a	a	b	a	a	a	c			a	e	a	a	a	c	a	f	f	a	c	a	a	a	d	a	a	a	a	a	a	c	c	c	d	a	d	4	4	4	4	4
Gorzkowice	gimnazjum	3	b	a	a	a	a	a	a	a	b	a	a	a	c			a	e	a	a	a	b	b	e	e	b			b	b	c		a	a	a	a	c	c	c	b	d	a	d	5	4	2	5	5
Gorzkowice	gimnazjum	3	b	a	a	a	a	a	a	a	b	a	a	a	e	a		a	e	a	a	a	b	a	f	c	a	a,c,d	a	a	a	e	a	a	a	a	a	a	b	b	c	d	b	d	5	5	5	5	5
Gorzkowice	gimnazjum	3	b	a	a	a	a	a	a	a	b	a	a	a	e	c		a	e	a	a	a	a,b	a	f	f	c			a	a	e	d	a	a	b	a	b	c	b	b	d	b	d	5	4	4	5	5
Gorzkowice	gimnazjum	3	b	a	a	a	a	a	a	a	b	a	a	a	b			a	e	a	a	a	e	a	e	f	c			c	a	b		a	a	a	a	a	c	c	c	d	b	d	3	3	3	3	3
Gorzkowice	gimnazjum	3	a	e	a	a	a	a	a	a	b	a	a	a	d			a	e	a	c	a	a	a	b	f	a	a,b,c,d	a	a	c	g		c	b	a	a	c	b	b	b	d	b	d	4	4	3	4	5
Gorzkowice	gimnazjum	3	a	c	a	a	a	a	a	a	b	a	a	a	e	c		a	e	c	c	a	b	c	c	f	a	b	a	c	c	g		d	b	a	a	b	c	b	c	d	a	d	5	4	3	4	5
Gorzkowice	gimnazjum	3	a	c	a	a	a	a	a	a	a	a	a	a	e	c		a	c	a	a	a	a,b	a	b	f	a	a,b,c,d	a	a	c	g		a	b	a	a	c	b	b	b	d	a	c	5	5	3	4	5
Gorzkowice	gimnazjum	3	b	a	a	a	a	a	a	a	a	a	a	a	e	c		a	e	a	c	c	b	a	b	f	a	a,b,c,d	a	a	c	g		c	a	b	a	b	b	b	b	d	a	d	5	5	3	4	5
Gorzkowice	gimnazjum	3	b	a	a	a	a	a	a	a	b	a	a	a	e	c		a	e	d	c	c	e	a	f	f	a	b,c,d	a	c	c	g		c	a	a	a	b	b	b	b	a	a	c	1	3	3	4	4
Gorzkowice	gimnazjum	2	a	e	b	b	b	c	e	d	a	f	f	f	e	b		a	a	c	a	a	b	a	a	a	b			c	a	e	a	b	c	a	c	c	b	c	c	c	b	b	4	4	3	3	2
Gorzkowice	gimnazjum	2	a	c	b	b	b	g	e	e	b	a	e	d	a			a	b	a	a	b	c	a	c	a	b			a	c	e	c	a	d	b	b	c	b	a	c	c	b	a	1	1	1	1	1
Gorzkowice	gimnazjum	2	a	e	b	b	b	c	e	d	a	f	f	f	e	b		a	a	c	a	a	b	a	a	a	b			c	a	e	a	b	c	a	c	c	b	c	c	c	b	b	4	4	3	3	2
Gorzkowice	gimnazjum	2	a	c	a	a	a	a	a	a	b	a	a	a	a			a	b	a	a	b	c	a	c	a	b			a	c	e	c	a	a	b	a	c	b	a	c	c	b	a	1	1	1	1	1
Gorzkowice	gimnazjum	2	a	e	b	b	b	c	e	d	a	f	f	f	e	b		a	a	c	a	a	b	a	a	a	b			c	a	e	a	b	c	a	c	c	b	c	c	c	b	b	4	4	3	3	2
Gorzkowice	gimnazjum	2	a	c	b	b	b	g	e	e	b	a	e	d	a			a	b	a	a	b	c	a	c	a	b			a	c	e	c	a	d	b	b	c	b	a	c	c	b	a	1	1	1	1	1
Gorzkowice	gimnazjum	2	a	e	b	b	b	c	e	d	a	f	f	f	e	b		a	a	c	a	a	b	a	a	a	b			c	a	e	a	b	c	a	c	c	b	c	c	c	b	b	4	4	3	3	2
Gorzkowice	gimnazjum	2	a	c	b	b	b	g	e	e	b	a	e	d	a			a	b	a	a	b	c	a	c	a	b			a	c	e	c	a	d	b	b	c	b	a	c	c	b	a	1	1	1	1	1
Gorzkowice	gimnazjum	2	a	e	a	a	a	a	a	a	a	f	a	a	e	b		a	a	c	a	a	b	a	a	a	b			c	a	e	a	b	c	a	c	c	b	c	c	c	b	b	4	4	3	3	2
Gorzkowice	gimnazjum	2	a	c	a	a	a	a	a	a	b	a	a	a	a			a	b	a	a	b	c	a	c	a	b			a	c	e	c	a	a	b	a	c	b	a	c	c	b	a	1	1	1	1	1
Gorzkowice	gimnazjum	2	a	e	b	b	b	c	e	d	a	f	f	f	e	b		a	a	c	a	a	b	a	a	a	b			c	a	e	a	b	c	a	c	c	b	c	c	c	b	b	4	4	3	3	2
Gorzkowice	gimnazjum	2	a	c	b	b	b	g	e	e	b	a	e	d	a			a	b	a	a	b	c	a	c	a	b			a	c	e	c	a	d	b	b	c	b	a	c	c	b	a	1	1	1	1	1
Gorzkowice	gimnazjum	2	a	e	b	b	b	c	e	d	a	f	f	f	e	b		a	a	c	a	a	b	a	a	a	b			c	a	e	a	b	c	a	c	c	b	c	c	c	b	b	4	4	3	3	2
Gorzkowice	gimnazjum	2	a	c	b	b	b	g	e	e	b	a	e	d	a			a	b	a	a	b	c	a	c	a	b			a	c	e	c	a	d	b	b	c	b	a	c	c	b	a	1	1	1	1	1
Gorzkowice	gimnazjum	2	a	e	a	a	a	a	a	a	a	f	a	a	e	b		a	a	c	a	a	b	a	a	a	b			c	a	e	a	b	c	a	c	c	b	c	c	c	b	b	4	4	3	3	2
Gorzkowice	gimnazjum	2	a	c	b	b	b	g	e	e	b	a	e	d	a			a	b	a	a	b	c	a	c	a	b			a	c	e	c	a	d	b	b	c	b	a	c	c	b	a	1	1	1	1	1
Gorzkowice	gimnazjum	2	a	e	b	b	b	c	e	d	a	f	f	f	e	b		a	a	c	a	a	b	a	a	a	b			c	a	e	a	b	c	a	c	c	b	c	c	c	b	b	4	4	3	3	2
Gorzkowice	gimnazjum	2	a	c	b	b	b	g	e	e	b	a	e	d	a			a	b	a	a	b	c	a	c	a	b			a	c	e	c	a	d	b	b	c	b	a	c	c	b	a	1	1	1	1	1
Gorzkowice	gimnazjum	2	a	e	b	b	b	c	e	d	a	f	f	f	e	b		a	a	c	a	a	b	a	a	a	b			c	a	e	a	b	c	a	c	c	b	c	c	c	b	b	4	4	3	3	2
Gorzkowice	gimnazjum	2	a	c	b	b	b	g	e	e	b	a	e	d	a			a	b	a	a	b	c	a	c	a	b			a	c	e	c	a	d	b	b	c	b	a	c	c	b	a	1	1	1	1	1
Gorzkowice	gimnazjum	2	a	e	a	a	a	a	a	a	a	f	a	a	e	b		a	a	c	a	a	b	a	a	a	b			c	a	e	a	b	c	a	c	c	b	c	c	c	b	b	4	4	3	3	2
Gorzkowice	gimnazjum	2	a	c	b	b	b	g	e	e	b	a	e	d	a			a	b	a	a	b	c	a	c	a	b			a	c	e	c	a	d	b	b	c	b	a	c	c	b	a	1	1	1	1	1
Gorzkowice	gimnazjum	2	a	e	b	b	b	c	e	d	a	f	f	f	e	b		a	a	c	a	a	b	a	a	a	b			c	a	e	a	b	c	a	c	c	b	c	c	c	b	b	4	4	3	3	2
Gorzkowice	gimnazjum	2	a	c	b	b	b	g	e	e	b	a	e	d	a			a	b	a	a	b	c	a	c	a	b			a	c	e	c	a	d	b	b	c	b	a	c	c	b	a	1	1	1	1	1
Gorzkowice	gimnazjum	2	a	e	a	a	a	a	a	a	a	f	a	a	e	b		a	a	c	a	a	b	a	a	a	b			c	a	e	a	b	c	a	c	c	b	c	c	c	b	b	4	4	3	3	2
Gorzkowice	gimnazjum	2	a	c	b	b	b	g	e	e	b	a	e	d	a			a	b	a	a	b	c	a	c	a	b			a	c	e	c	a	d	b	b	c	b	a	c	c	b	a	1	1	1	1	1
Gorzkowice	gimnazjum	2	a	e	a	a	a	a	a	a	a	f	a	a	e	b		a	a	c	a	a	b	a	a	a	b			c	a	e	a	b	c	a	c	c	b	c	c	c	b	b	4	4	3	3	2
Gorzkowice	gimnazjum	2	a	c	a	a	a	a	a	a	b	a	a	a	a			a	b	a	a	b	c	a	c	a	b			a	c	e	c	a	a	b	a	c	b	a	c	c	b	a	1	1	1	1	1
Gorzkowice	gimnazjum	2	a	e	b	b	b	c	e	d	a	f	f	f	e	b		a	a	c	a	a	b	a	a	a	b			c	a	e	a	b	c	a	c	c	b	c	c	c	b	b	4	4	3	3	2
Gorzkowice	gimnazjum	2	a	c	b	b	b	g	e	e	b	a	e	d	a			a	b	a	a	b	c	a	c	a	b			a	c	e	c	a	d	b	b	c	b	a	c	c	b	a	1	1	1	1	1
Gorzkowice	gimnazjum	2	a	e	b	b	b	c	e	d	a	f	f	f	e	b		a	a	c	a	a	b	a	a	a	b			c	a	e	a	b	c	a	c	c	b	c	c	c	b	b	4	4	3	3	2
Gorzkowice	gimnazjum	2	a	c	b	b	b	g	e	e	b	a	e	d	a			a	b	a	a	b	c	a	c	a	b			a	c	e	c	a	d	b	b	c	b	a	c	c	b	a	1	1	1	1	1
Gorzkowice	gimnazjum	2	a	e	b	b	b	c	e	d	a	f	f	f	e	b		a	a	c	a	a	b	a	a	a	b			c	a	e	a	b	c	a	c	c	b	c	c	c	b	b	4	4	3	3	2
Gorzkowice	gimnazjum	2	a	c	a	a	a	a	a	a	b	a	a	a	a			a	b	a	a	b	c	a	c	a	b			a	c	e	c	a	a	b	a	c	b	a	c	c	b	a	1	1	1	1	1
Gorzkowice	gimnazjum	2	a	e	b	b	b	c	e	d	a	f	f	f	e	b		a	a	c	a	a	b	a	a	a	b			c	a	e	a	b	c	a	c	c	b	c	c	c	b	b	4	4	3	3	2
Gorzkowice	gimnazjum	2	a	c	b	b	b	g	e	e	b	a	e	d	a			a	b	a	a	b	c	a	c	a	b			a	c	e	c	a	d	b	b	c	b	a	c	c	b	a	1	1	1	1	1
Gorzkowice	gimnazjum	2	a	c	a	a	a	a	a	a	a	a	a	a	e	c		a	d	c	a	a	b	c	f	f	c			a	c	g		b	b	a	c	c	c	c	c	d	b	c	1	1	1	1	1
Gorzkowice	gimnazjum	2	a	c	b	b	d	c	b	e	b	a	d	f	e	c		b	d	c	a	a	b	c	f	f	c			a	c	g		b	b	a	c	c	c	c	c	d	b	c	1	1	1	1	1
Gorzkowice	gimnazjum	2	a	c	b	b	d	c	b	e	a	a	d	f	e	c		b	d	c	a	a	b	c	f	f	c			a	c	g		b	b	a	c	c	c	c	c	d	b	c	1	1	1	1	1
Gorzkowice	gimnazjum	2	a	c	a	a	a	a	a	a	b	a	a	a	e	c		a	d	c	a	a	b	c	f	f	c			a	c	g		b	b	a	c	c	c	c	c	d	b	c	1	1	1	1	1
Gorzkowice	gimnazjum	2	a	c	a	a	a	a	a	a	a	a	a	a	e	c		a	d	c	a	a	b	c	f	f	c			a	c	g		b	b	a	c	c	c	c	c	d	b	c	1	1	1	1	1
Gorzkowice	gimnazjum	2	a	c	b	b	d	c	b	e	b	a	d	f	e	c		b	d	c	a	a	b	c	f	f	c			a	c	g		b	b	a	c	c	c	c	c	d	b	c	1	1	1	1	1
Gorzkowice	gimnazjum	2	a	c	b	b	d	c	b	e	a	a	d	f	e	c		b	d	c	a	a	b	c	f	f	c			a	c	g		b	b	a	c	c	c	c	c	d	b	c	1	1	1	1	1
Gorzkowice	gimnazjum	2	a	c	a	a	a	a	a	a	b	a	a	a	e	c		a	d	c	a	a	b	c	f	f	c			a	c	g		b	b	a	c	c	c	c	c	d	b	c	1	1	1	1	1
Gorzkowice	gimnazjum	2	a	c	a	a	a	a	a	a	a	a	a	a	e	c		a	d	c	a	a	b	c	f	f	c			a	c	g		b	b	a	c	c	c	c	c	d	b	c	1	1	1	1	1
Gorzkowice	gimnazjum	2	a	c	b	b	d	c	b	e	b	a	d	f	e	c		b	d	c	a	a	b	c	f	f	c			a	c	g		b	b	a	c	c	c	c	c	d	b	c	1	1	1	1	1
Gorzkowice	gimnazjum	2	a	c	b	b	d	c	b	e	a	a	d	f	e	c		b	d	c	a	a	b	c	f	f	c			a	c	g		b	b	a	c	c	c	c	c	d	b	c	1	1	1	1	1
Gorzkowice	gimnazjum	2	a	c	a	a	a	a	a	a	b	a	a	a	e	c		a	d	c	a	a	b	c	f	f	c			a	c	g		b	b	a	c	c	c	c	c	d	b	c	1	1	1	1	1
Gorzkowice	gimnazjum	2	a	c	b	b	d	c	b	e	a	a	d	f	e	c		b	d	c	a	a	b	c	f	f	c			a	c	g		b	b	a	c	c	c	c	c	d	b	c	1	1	1	1	1
Gorzkowice	gimnazjum	2	a	c	a	a	a	a	a	a	b	a	a	a	e	c		a	d	c	a	a	b	c	f	f	c			a	c	g		b	b	a	c	c	c	c	c	d	b	c	1	1	1	1	1
Gorzkowice	gimnazjum	2	a	c	b	b	d	c	b	e	a	a	d	f	e	c		b	d	c	a	a	b	c	f	f	c			a	c	g		b	b	a	c	c	c	c	c	d	b	c	1	1	1	1	1
Gorzkowice	gimnazjum	2	a	c	a	a	a	a	a	a	b	a	a	a	e	c		a	d	c	a	a	b	c	f	f	c			a	c	g		b	b	a	c	c	c	c	c	d	b	c	1	1	1	1	1
Gorzkowice	gimnazjum	2	a	c	b	b	d	c	b	e	b	a	d	f	e	c		b	d	c	a	a	b	c	f	f	c			a	c	g		b	b	a	c	c	c	c	c	d	b	c	1	1	1	1	1
Gorzkowice	gimnazjum	2	a	d	e	d	b	h	d	e	a	e	b	f	e	c		a	b	a	a	a	b	a	f	a	a	a,b,c,d	c	a	a	g		a	a	a	b	c	b	b	a	d	b	b	5	4	3	4	4
Gorzkowice	gimnazjum	2	a	d	a	a	a	a	a	a	a	e	a	a	e	c		a	b	a	a	a	b	a	f	a	a	a,b,c,d	c	a	a	g		a	a	a	b	c	b	b	a	d	b	b	5	4	3	4	4
Gorzkowice	gimnazjum	2	a	d	c	d	b	h1	d	e	a	e	b	f	e	c		a	b	a	a	a	b	a	f	a	a	a,b,c,d	c	a	a	g		a	a	a	b	c	b	b	a	d	b	b	5	4	3	4	4
Gorzkowice	gimnazjum	2	a	d	a	a	a	a	a	a	a	e	a	a	e	c		a	b	a	a	a	b	a	f	a	a	a,b,c,d	c	a	a	g		a	a	a	b	c	b	b	a	d	b	b	5	4	3	4	4
Gorzkowice	gimnazjum	2	a	d	c	d	b	h1	d	e	a	e	b	f	e	c		a	b	a	a	a	b	a	f	a	a	a,b,c,d	c	a	a	g		a	a	a	b	c	b	b	a	d	b	b	5	4	3	4	4
Gorzkowice	gimnazjum	2	a	d	b	d	b	h1	d	e	a	e	b	f	e	c		a	b	a	a	a	b	a	f	a	a	a,b,c,d	c	a	a	g		a	a	a	b	c	b	b	a	d	b	b	5	4	3	4	4
Gorzkowice	gimnazjum	2	a	d	a	a	a	a	a	a	a	e	a	a	e	c		a	b	a	a	a	b	a	f	a	a	a,b,c,d	c	a	a	g		a	a	a	b	c	b	b	a	d	b	b	5	4	3	4	4
Gorzkowice	gimnazjum	2	a	d	a	a	a	a	a	a	a	e	a	a	e	c		a	b	a	a	a	b	a	f	a	a	a,b,c,d	c	a	a	g		a	a	a	b	c	b	b	a	d	b	b	5	4	3	4	4
Gorzkowice	gimnazjum	2	a	c	g	e	b	e	e	d	a	b	c	b	c			d		b	b	b	b	b	a	a	c			b	b	b		c	c	b	b	c	b	b	b	a	d	d	4	4	4	4	4
Gorzkowice	gimnazjum	2	a	d	g	f	b	g	e	e	a	b	b	d	e	b		c		b	b	b	b	a	f	e	a	a,b	c	b	a	b		c	a	a	d	a	b	a	a	a	a	a	1	2	1	3	1
Gorzkowice	gimnazjum	2	a	c	g	f	b	b	b	e	a	c	c	d	e	b	5	c		a	a	a	b	a	b	a	a	c	b	b	a	b		c	c	b	b	c	b	b	c	d	d	d	5	5	5	5	5
Gorzkowice	gimnazjum	2	a	b	g	d	b	c	c	b	a	g	e	d	e	c	10	b		c	c	c	e	a	a	a	a	d	c	c	c	e	b	c	c	a	d	c	a	b	c	d	d	d	4	4	2	4	5
Gorzkowice	gimnazjum	2	a	b	g	d	b	c	b	b	a	c	c	b	d			b		a	a	a	a	a	f	b	a	a	a	a	b	g		c	c	a	d	c	c	b	b	c	c	d	5	5	5	5	5
Gorzkowice	gimnazjum	2	a	b	g	e	b	e	e	d	a	a	e	d	b			c		b	a	a	a	a	e	d	a	a	a	a	a	f		d	d	b	d	c	c	c	c	c	d	d	4	4	4	3	3
Gorzkowice	gimnazjum	2	a	e	g	f	b	c	e	e	a	b	d	g	b			c		a	a	c	e	a	d	d	a	a,c	b	c	c	g		d	d	a	d	c	b	b	b	d	c	c	5	5	5	5	5
Gorzkowice	gimnazjum	2	a	b	g	f	b	b	e	e	a	a	f	d	g			c		c	c	c	c	c	f	f	c			c	b	e	c	a	d	a	d	d	c	c	a	d	d	a	3	4	2	5	5
Gorzkowice	gimnazjum	2	b	a	a	a	a	a	a	a	b	a	a	a	e	c		a	c	c	c	c	b	a	f	f	a	b,c,d	a	c	c	g		a	a	a	a	b	b	b	b	d	a	c	5	4	3	4	4
Gorzkowice	gimnazjum	2	b	a	a	a	a	a	a	a	b	a	a	a	e	c	20	a	d	c	c	c	e	c	f	f	a	d	c	c	c	e	a	c	a	b	a	c	c	c	c	c	a	d	4	4	4	4	4
Gorzkowice	gimnazjum	2	b	a	a	a	a	a	a	a	b	a	a	a	c			a	e	a	c	a	b	a	a	f	a	c,d	c	a	a	c		a	a	a	a	b	c	c	a	d	a	c	5	4	2	4	5
Gorzkowice	gimnazjum	2	b	a	a	a	a	a	a	a	a	a	a	a	e	c		a	e	a	a	c	b	a	a	f	c			c	c	e	a	d	a	b	c	c	b	b	a	d	c	a	5	1	2	3	5
Gorzkowice	gimnazjum	2	b	a	a	a	a	a	a	a	b	a	a	a	c			a	e	a	c	a	b	a	a	f	a	c,d	c	a	a	c		a	a	a	a	b	c	c	a	d	a	c	5	4	2	4	5
Gorzkowice	gimnazjum	2	b	a	a	a	a	a	a	a	b	a	a	a	c			a	e	a	c	a	b	a	a	f	a	c,d	c	a	a	c		a	a	a	a	b	c	c	a	d	a	c	5	4	2	4	5
Gorzkowice	gimnazjum	2	b	a	a	a	a	a	a	a	a	a	a	a	e	c		a	e	a	a	c	b	a	a	f	c			c	c	e	a	d	a	b	c	c	b	b	a	d	c	a	5	1	2	3	5
Gorzkowice	gimnazjum	2	b	a	a	a	a	a	a	a	b	a	a	a	c			a	e	a	c	a	b	a	a	f	a	c,d	c	a	a	c		a	a	a	a	b	c	c	a	d	a	c	5	4	2	4	5
Gorzkowice	gimnazjum	2	b	a	a	a	a	a	a	a	b	a	a	a	e	a		a	e	a	a	a	b	a	f	f	c			c	a	e	a	a	a	b	a	b	c	b	b	d	b	d	5	4	5	5	5
Gorzkowice	gimnazjum	2	a	f	a	a	a	a	a	a	a	a	a	a	e	a		a	e	c	c	c	e	c	f	f	c			c	c	d	d	a	a	a	c	c	b	b	c	d	d	d	5	5	5	4	5
Gorzkowice	gimnazjum	2	b	a	a	a	a	a	a	a	b	a	a	a	c			a	e	a	a	a	c	a	f	f	a	c	a	a	a	d	a	a	a	a	a	a	c	c	c	d	a	d	4	4	4	4	4
Gorzkowice	gimnazjum	2	b	a	a	a	a	a	a	a	b	a	a	a	c			a	e	a	a	a	b	b	e	e	b			b	b	c		a	a	a	a	c	c	c	b	d	a	d	5	4	2	5	5
Gorzkowice	gimnazjum	2	b	a	a	a	a	a	a	a	b	a	a	a	e	a		a	e	a	a	a	b	a	f	c	a	a,c,d	a	a	a	e	a	a	a	a	a	a	b	b	c	d	b	d	5	5	5	5	5
Gorzkowice	gimnazjum	2	b	a	a	a	a	a	a	a	b	a	a	a	e	c		a	e	a	a	a	a,b	a	f	f	c			a	a	e	d	a	a	b	a	b	c	b	b	d	b	d	5	4	4	5	5
Gorzkowice	gimnazjum	2	b	a	a	a	a	a	a	a	b	a	a	a	b			a	e	a	a	a	e	a	e	f	c			c	a	b		a	a	a	a	a	c	c	c	d	b	d	3	3	3	3	3
Gorzkowice	gimnazjum	2	a	e	a	a	a	a	a	a	b	a	a	a	d			a	e	a	c	a	a	a	b	f	a	a,b,c,d	a	a	c	g		c	b	a	a	c	b	b	b	d	b	d	4	4	3	4	5
Gorzkowice	gimnazjum	2	a	c	a	a	a	a	a	a	b	a	a	a	e	c		a	e	c	c	a	b	c	c	f	a	b	a	c	c	g		d	b	a	a	b	c	b	c	d	a	d	5	4	3	4	5
Gorzkowice	gimnazjum	2	a	c	a	a	a	a	a	a	a	a	a	a	e	c		a	c	a	a	a	a,b	a	b	f	a	a,b,c,d	a	a	c	g		a	b	a	a	c	b	b	b	d	a	c	5	5	3	4	5
Gorzkowice	gimnazjum	2	b	a	a	a	a	a	a	a	a	a	a	a	e	c		a	e	a	c	c	b	a	b	f	a	a,b,c,d	a	a	c	g		c	a	b	a	b	b	b	b	d	a	d	5	5	3	4	5
Gorzkowice	gimnazjum	2	b	a	a	a	a	a	a	a	b	a	a	a	e	c		a	e	d	c	c	e	a	f	f	a	b,c,d	a	c	c	g		c	a	a	a	b	b	b	b	a	a	c	1	3	3	4	4
Gorzkowice	gimnazjum	2	b	a	a	a	a	a	a	a	b	a	a	a	e	c		a	c	c	c	c	b	a	f	f	a	b,c,d	a	c	c	g		a	a	a	a	b	b	b	b	d	a	c	5	4	3	4	4
Gorzkowice	gimnazjum	2	a	e	a	a	a	a	a	a	b	a	a	a	e	b		a	c	c	c	c	e	b	e	b	a	a,c,e4	a	a	a	e	a	d	a	a	a	a	b	b	c	d	c	c	4	4	4	4	4
Gorzkowice	gimnazjum	2	a	f	a	a	a	a	a	a	b	a	a	a	e	c	2	a	d	a	a	a	b	c	f	f	a	c	c	c	c	e	a	a	a	a	b	b	c	c	a	d	c	b	4	3	2	4	4
Gorzkowice	gimnazjum	2	a	e	a	a	a	a	a	a	b	a	a	a	e	b		a	b	a	a	a	e	a	f	a	a	c	c	a	c	e	a	a	a	b	a	c	b	b	b	c	b	c	4	4	3	4	5
Gorzkowice	gimnazjum	2	b	a	a	a	a	a	a	a	b	a	a	a	e	b		a	e	a	a	a	b	b	f	a	a	a,c	a	a	a	e	a	a	a	b	a	b	b	b	b	d	c	d	5	4	4	5	5
Gorzkowice	gimnazjum	2	b	a	a	a	a	a	a	a	a	a	a	a	c			a	e	a	a	a	e	c	f	f	c			c	c	c		c	a	a	a	a	c	c	c	d	b	c	4	4	4	4	3
Gorzkowice	gimnazjum	2	b	a	a	a	a	a	a	a	b	a	a	a	g			a	e	a	a	a	d	b	e	e	c			a	b	e	a	a	a	a	a	a	b	b	b	d	a	c	4	3	3	2	5
Gorzkowice	gimnazjum	2	b	a	a	a	a	a	a	a	b	a	a	a	e	a		a	e	a	a	a	b	a	e	d	a	a,c,d	a	a	a	e	a	a	a	a	a	c	c	b	b	d	b	d	5	5	4	5	5
Gorzkowice	gimnazjum	2	b	a	a	a	a	a	a	a	b	a	a	a	e	a		a	e	a	a	a	b	a	e	d	a	a,c,d	a	a	a	e	a	a	a	a	a	c	c	b	b	d	b	d	5	5	4	5	5
Gorzkowice	gimnazjum	2	b	a	a	a	a	a	a	a	b	a	a	a	e	b		a	e	a	a	a	b	a	f	f	a	a,b,d	a	a	c	c		a	a	a	a	a	c	b	b	d	b	c	4	4	3	4	5
Gorzkowice	gimnazjum	2	b	a	a	a	a	a	a	a	b	a	a	a	e	a		a	e	a	a	a	b	a	e	f	a	a,c,d	a	a	a	e	a	a	a	b	a	a	c	b	a	d	b	c	5	4	4	4	5
Gorzkowice	gimnazjum	2	b	a	a	a	a	a	a	a	b	a	a	a	c			a	e	a	a	a	b	a	e	d	a	a,b,c,d	a	a	a	c		a	a	a	a	a	b	b	c	d	a	d	5	5	5	5	5
Gorzkowice	gimnazjum	2	b	a	a	a	a	a	a	a	a	b	a	a	d			a	b	a	c	b	b	a	f	b	b			b	b	c		a	a	b	a	c	c	c	b	c	b	c	4	4	2	5	5
Gorzkowice	gimnazjum	2	a	c	a	a	a	a	a	a	b	a	a	a	d			a	b	a	c	c	b	a	f	b	b			c	a	c		a	a	b	a	c	c	b	c	d	b	c	5	4	4	5	4
Gorzkowice	gimnazjum	2	b	a	a	a	a	a	a	a	b	a	a	a	b			a	c	a	b	c	b	a	a	b	b			a	c	b		d	a	a	c	b	a	b	c	b	b	d	5	5	5	5	5
Gorzkowice	gimnazjum	2	a	f	a	a	a	a	a	a	a	a	a	a	e	c		a	e	c	c	c	e	b	e	d	a	a,b,c,d	a	c	c	e	b	a	a	b	a	d	b	b	b	c	b	b	3	4	3	4	4
Gorzkowice	gimnazjum	2	b	a	a	a	a	a	a	a	b	a	a	a	b			a	e	a	a	a	e	a	e	f	c			c	a	b		c	a	a	a	b	b	b	b	d	a	a	3	3	3	3	3
Gorzkowice	gimnazjum	2	b	a	a	a	a	a	a	a	b	a	a	a	b			a	e	a	a	a	e	a	f	f	c			a	a	b		c	a	a	a	b	b	b	b	d	a	a	3	3	3	3	3
Gorzkowice	gimnazjum	2	b	a	a	a	a	a	a	a	b	a	a	a	e	a		a	e	a	a	a	e	a	e	f	a	a,b,c,d	a	c	a	e	a	c	a	a	a	d	c	c	b	c	b	a	4	3	2	1	1
Gorzkowice	gimnazjum	2	b	a	a	a	a	a	a	a	b	a	a	a	g			a	e	c	c	c	e	a	f	f	c			c	a	g		a	a	a	a	a	b	b	c	d	a	d	5	3	3	4	5
Gorzkowice	gimnazjum	2	a	f	a	a	a	a	a	a	b	a	a	a	e	c		a	b	a	a	a	a	a	a	a	a	a,b,c	a	b	b	g		c	a	a	a	a	b	b	b	d	a	c	3	5	2	5	5
Gorzkowice	gimnazjum	2	b	a	a	a	a	a	a	a	a	b	a	a	e	b	5	a	d	a	a	a	b	c	a	a	a	a,b,c,d	b	c	c	g		a	a	b	a	b	c	b	b	c	c	c	4	3	3	4	4
Gorzkowice	gimnazjum	2	a	c	a	a	a	a	a	a	a	a	a	a	e	b		a	b	c	b	a	d	b	a	a	a	a,c	a	a	b	c		a	a	b	a	d	a	b	a	d	b	c	1	5	5	1	3
Gorzkowice	gimnazjum	2	a	d	a	a	a	a	a	a	a	a	a	a	e	b	18	a	d	a	a	c	b	c	f	a	a	a,c,d	c	c	a	d	a	a	a	a	a	c	c	c	b	d	b	c	5	4	3	4	5
Gorzkowice	gimnazjum	2	b	a	a	a	a	a	a	a	b	a	a	a	e	b		a	e	a	a	a	b,c	c	f	a	a	a,b,c,d	a	a	b	c		c	a	b	a	a	b	b	c	a	b	d	5	4	4	5	5
Gorzkowice	gimnazjum	2	a	c	a	a	a	a	a	a	a	a	a	a	e	b		a	b	c	b	a	d	b	a	a	a	a,c	a	a	b	c		a	a	b	a	d	a	b	a	d	b	c	1	5	5	1	3
Gorzkowice	gimnazjum	2	a	d	a	a	a	a	a	a	a	a	a	a	e	b	18	a	d	a	a	c	b	c	f	a	a	a,c,d	c	c	a	d	a	a	a	a	a	c	c	c	b	d	b	c	5	4	3	4	5
Gorzkowice	gimnazjum	2	b	a	a	a	a	a	a	a	b	a	a	a	g			a	e	a	a	a	d	b	e	e	c			a	b	e	a	a	a	a	a	a	b	b	b	d	a	c	4	3	3	2	5
Gorzkowice	gimnazjum	2	b	a	a	a	a	a	a	a	b	a	a	a	e	a		a	e	a	a	a	b	a	e	d	a	a,c,d	a	a	a	e	a	a	a	a	a	c	c	b	b	d	b	d	5	5	4	5	5
Gorzkowice	gimnazjum	2	b	a	a	a	a	a	a	a	b	a	a	a	e	a		a	e	a	a	a	b	a	e	d	a	a,c,d	a	a	a	e	a	a	a	a	a	c	c	b	b	d	b	d	5	5	4	5	5
Gorzkowice	gimnazjum	1	a	e	g	d	b	b	e	d	b	a	f	b	e	b	3	b		c	c	c	b	a	f	a	a	a	a	b	c	e	a	d	a	a	a	a	b	b	b	d	b	c	5	4	2	3	5
Gorzkowice	gimnazjum	1	a	d	a	a	a	a	a	a	a	c	a	a	e	b		a	e	c	c	c	e	a	e	a	a	a,c	c	c	b	g		c	a	a	a	d	c	c	b	d	b	d	4	4	4	4	4
Gorzkowice	gimnazjum	1	a	b	g	d	g	h3	d	b	a	b	c	d	e	b	10	b		b	b	b	b	a	a	a	a	a	c	c	a	d	b	b	d	b	d	d	c	c	b	c	c	c	3	3	3	3	3
Gorzkowice	gimnazjum	1	a	b	g	e	b	c	e	e	a	b	b	f	e	b	10	b		a	a	a	b	a	a	a	a	b,c	c	a	a	g		b	c	a	d	d	c	b	c	d	c	d	5	4	3	5	5
Gorzkowice	gimnazjum	1	a	b	g	c	d	c	g	d	a	b	e	f	e	b	5	b		a	a	a	a	a	e	e	a	a,b,c,d	a	a	a	e	a	a	b	a	c	d	c	b	a	c	b	c	4	4	4	4	4
Gorzkowice	gimnazjum	1	a	e	d	d	b	c	e	d	a	g	c	d	c			c		a	c	b	d	b	f	a	b			b	b	g		b	d	a	d	c	b	c	b	c	c	c	4	4	3	4	4
Gorzkowice	gimnazjum	1	a	c	f	e	b	c	c	e	b	a	e	g3	e	b		c		c	c	c	e	c	f	b	c			a	a	c		a	c	a	c	d	c	b	c	d	b	c	4	3	3	2	4
Gorzkowice	gimnazjum	1	a	b	e	e	b	g	e	e	a	c	e	b	c			c		c	c	c	e	c	f	a	a	a	c	c	c	c		a	c	a	d	c	c	b	c	d	c	d	2	3	2	4	2
Gorzkowice	gimnazjum	1	a	d	f	e	b	b	e	e	a	a	g1	f	e	a		b		a	a	a	b	a	f	d	a	a,b,c,d	a	c	c	e	a	b	d	a	d	d	a	b	a	b	c	b	3	3	1	4	5
Gorzkowice	gimnazjum	1	a	b	e	d	b	c	b	b	a	b	c	d	g			b		a	a	a	b	a	f	f	c			a	c	g		a	c	a	b	c	c	c	c	c	c	c	4	4	4	3	4
Gorzkowice	gimnazjum	1	a	e	e	d	b	h	e	e	a	f	f	d	d			b		c	c	c	d	a	c	a	a	a,b	c	a	b	g		d	c	a	d	b	b	b	b	d	c	d	5	4	3	2	5
Gorzkowice	gimnazjum	1	a	d	f	e	b	g	e	e	a	e	f	g3	e	b		b		c	c	c	b	c	b	c	a	b	b	c	c	g		c	c	a	d	d	c	c	c	c	c	c	4	4	3	4	4
Gorzkowice	gimnazjum	1	a	d	a	a	a	a	a	a	a	a	a	a	d			a	b	c	c	c	c	c	f	f	c			c	c	c		c	a	a	a	c	c	c	c	c	c	d	5	5	3	4	5
Gorzkowice	gimnazjum	1	a	c	a	a	a	a	a	a	a	d	a	a	e	c		a	a	c	c	a	b	b	b	a	c			c	b	g		b	c	a	c	c	c	c	c	d	c	c	4	2	2	4	4
Gorzkowice	gimnazjum	1	a	c	a	a	a	a	a	a	a	a	a	a	d			a	b	a	c	c	d	a	a	a	c			a	b	g		a	a	a	a	c	c	c	c	d	c	c	4	4	3	2	4
Gorzkowice	gimnazjum	1	a	d	a	a	a	a	a	a	a	g	a	a	b			a	e	c	c	c	e	b	a	a	b			b	b	g		a	a	a	a	d	c	c	c	a	d	a	1	1	1	1	1
Gorzkowice	gimnazjum	1	a	d	f	e	g	b	e	c	a	d	b	f	e	c		b		c	c	c	b	c	b	f	a	a,b	b	c	c	g		b	d	a	d	d	c	c	c	d	c	c	4	4	3	4	4
Gorzkowice	gimnazjum	1	a	e	e	d	d	c	e	e	a	d	c	f	g			b		c	c	c	e	c	f	f	c			c	c	g		e	b	a	c	b	c	b	b	c	c	c	1	2	2	5	4
Gorzkowice	gimnazjum	1	a	d	f	d	c	b	d	b	a	b	c	d	e	a		c		a	a	c	b	a	e	e	a	a	a	a	c	e	a	b	d	a	d	d	c	b	c	d	a	d	5	3	3	3	3
Gorzkowice	gimnazjum	1	a	d	a	a	a	a	a	a	b	a	a	a	e	b	2	a	e	b	a	b	d	a	a	a	a	a,b,c,d	b	b	a	e	a	a	a	b	a	d	a	b	b	c	d	a	5	5	5	5	5
Gorzkowice	gimnazjum	1	a	d	e	e	b	e	e	e	a	a	e	d	b			c		b	a	a	a	a	e	d	a	a	a	a	a	c		c	c	a	c	c	c	c	b	d	c	d	5	5	4	5	5
Gorzkowice	gimnazjum	1	a	e	e	c	d	c	b	b	a	g	e	d	e	a		b		a	a	a	a,b	b	b	a	a	b	a	c	a	e	a	a	c	a	d	d	b	b	b	d	c	d	5	5	4	4	5
Gorzkowice	gimnazjum	1	a	e	f	f	b	c	e	e	a	b	g	d	e	b		c		a	a	a	a,b	a	a	a	c			c	c	e	a	d	d	a	d	c	b	b	c	d	c	d	5	5	5	5	5
Gorzkowice	gimnazjum	1	a	d	a	a	a	a	a	a	a	d	a	a	b			a	b	b	c	a	c	b	d	a	b			b	c	d	c	c	a	b	a	a	a	c	b	b	a	d	1	2	3	5	4
Gorzkowice	gimnazjum	1	a	e	d	b	d	b	g	e	a	d	f	d	c			b		a	a	a	b	b	e	a	c			a	b	d	b	a	c	b	c	c	c	b	b	d	c	d	5	5	5	5	5
Gorzkowice	gimnazjum	1	a	e	e	b	d	b	g	e	a	b	b	g5	b			b		a	a	a	a	a	a	a	a	a	a	a	a	d	c	c	c	b	c	c	b	b	b	b	b	a	5	4	3	5	4
Gorzkowice	gimnazjum	1	a	c	a	a	a	a	a	a	b	a	a	a	a			a	b	a	a	b	c	a	c	a	b			a	c	e	c	a	a	b	a	c	b	a	c	c	b	a	1	1	1	1	1
Gorzkowice	gimnazjum	1	a	e	e	c	d	c	b	b	a	g	e	d	e	a		b		a	a	a	a,b	b	b	a	a	b	a	c	a	e	a	a	c	a	d	d	b	b	b	d	c	d	5	5	4	4	5
Gorzkowice	gimnazjum	1	a	e	f	f	b	c	e	e	a	b	g	d	e	b		c		a	a	a	a,b	a	a	a	c			c	c	e	a	d	d	a	d	c	b	b	c	d	c	d	5	5	5	5	5
Gorzkowice	gimnazjum	1	a	d	b	f	c	d	b	f	a	d	c	e	b			a	b	b	c	a	c	b	d	a	b			b	c	d	c	c	c	b	d	a	a	c	b	b	a	d	1	2	3	5	4
Gorzkowice	gimnazjum	1	a	e	d	b	d	b	g	e	a	d	f	d	c			b		a	a	a	b	b	e	a	c			a	b	d	b	a	c	b	c	c	c	b	b	d	c	d	5	5	5	5	5
Gorzkowice	gimnazjum	1	a	e	e	b	d	b	g	e	a	b	b	g5	b			b		a	a	a	a	a	a	a	a	a	a	a	a	d	c	c	c	b	c	c	b	b	b	b	b	a	5	4	3	5	4
Gorzkowice	gimnazjum	1	a	c	a	a	a	a	a	a	b	a	a	a	a			a	b	a	a	b	c	a	c	a	b			a	c	e	c	a	a	b	a	c	b	a	c	c	b	a	1	1	1	1	1
Gorzkowice	gimnazjum	1	b	a	a	a	a	a	a	a	b	a	a	a	g			a	e	a	a	a	d	b	e	e	c			a	b	e	a	a	a	a	a	a	b	b	b	d	a	c	4	3	3	2	5
Gorzkowice	gimnazjum	1	b	a	a	a	a	a	a	a	b	a	a	a	e	a		a	e	a	a	a	b	a	e	d	a	a,c,d	a	a	a	e	a	a	a	a	a	c	c	b	b	d	b	d	5	5	4	5	5
Gorzkowice	gimnazjum	1	b	a	a	a	a	a	a	a	b	a	a	a	e	a		a	e	a	a	a	b	a	e	d	a	a,c,d	a	a	a	e	a	a	a	a	a	c	c	b	b	d	b	d	5	5	4	5	5
Gorzkowice	gimnazjum	1	b	a	a	a	a	a	a	a	b	a	a	a	e	b		a	e	a	a	a	b	a	f	f	a	a,b,d	a	a	c	c		a	a	a	a	a	c	b	b	d	b	c	4	4	3	4	5
Gorzkowice	gimnazjum	1	b	a	a	a	a	a	a	a	b	a	a	a	e	a		a	e	a	a	a	b	a	e	f	a	a,c,d	a	a	a	e	a	a	a	b	a	a	c	b	a	d	b	c	5	4	4	4	5
Gorzkowice	gimnazjum	1	b	a	a	a	a	a	a	a	b	a	a	a	c			a	e	a	a	a	b	a	e	d	a	a,b,c,d	a	a	a	c		a	a	a	a	a	b	b	c	d	a	d	5	5	5	5	5
Gorzkowice	gimnazjum	1	b	a	a	a	a	a	a	a	a	b	a	a	d			a	b	a	c	b	b	a	f	b	b			b	b	c		a	a	b	a	c	c	c	b	c	b	c	4	4	2	5	5
Gorzkowice	gimnazjum	1	a	c	a	a	a	a	a	a	b	a	a	a	d			a	b	a	c	c	b	a	f	b	b			c	a	c		a	a	b	a	c	c	b	c	d	b	c	5	4	4	5	4
Gorzkowice	gimnazjum	1	b	a	a	a	a	a	a	a	b	a	a	a	b			a	c	a	b	c	b	a	a	b	b			a	c	b		d	a	a	c	b	a	b	c	b	b	d	5	5	5	5	5
Gorzkowice	gimnazjum	1	b	a	a	a	a	a	a	a	b	a	a	a	b			a	e	a	a	a	e	a	e	f	c			c	a	b		c	a	a	a	b	b	b	b	d	a	a	3	3	3	3	3
Gorzkowice	gimnazjum	1	b	a	a	a	a	a	a	a	b	a	a	a	b			a	e	a	a	a	e	a	f	f	c			a	a	b		c	a	a	a	b	b	b	b	d	a	a	3	3	3	3	3
Gorzkowice	gimnazjum	1	b	a	a	a	a	a	a	a	b	a	a	a	e	a		a	e	a	a	a	e	a	e	f	a	a,b,c,d	a	c	a	e	a	c	a	a	a	d	c	c	b	c	b	a	4	3	2	1	1
Gorzkowice	gimnazjum	1	b	a	a	a	a	a	a	a	b	a	a	a	g			a	e	c	c	c	e	a	f	f	c			c	a	g		a	a	a	a	a	b	b	c	d	a	d	5	3	3	4	5
Gorzkowice	gimnazjum	1	b	a	a	a	a	a	a	a	a	b	a	a	e	b	5	a	d	a	a	a	b	c	a	a	a	a,b,c,d	b	c	c	g		a	a	b	a	b	c	b	b	c	c	c	4	3	3	4	4
Gorzkowice	gimnazjum	1	a	c	a	a	a	a	a	a	a	a	a	a	e	b		a	b	c	b	a	d	b	a	a	a	a,c	a	a	b	c		a	a	b	a	d	a	b	a	d	b	c	1	5	5	1	3
Gorzkowice	gimnazjum	1	b	a	a	a	a	a	a	a	b	a	a	a	e	b		a	e	a	a	a	b,c	c	f	a	a	a,b,c,d	a	a	b	c		c	a	b	a	a	b	b	c	a	b	d	5	4	4	5	5
Gorzkowice	gimnazjum	1	a	c	a	a	a	a	a	a	a	a	a	a	e	b		a	b	c	b	a	d	b	a	a	a	a,c	a	a	b	c		a	a	b	a	d	a	b	a	d	b	c	1	5	5	1	3
Gorzkowice	gimnazjum	1	b	a	a	a	a	a	a	a	b	a	a	a	g			a	e	a	a	a	d	b	e	e	c			a	b	e	a	a	a	a	a	a	b	b	b	d	a	c	4	3	3	2	5
Gorzkowice	gimnazjum	1	b	a	a	a	a	a	a	a	b	a	a	a	e	a		a	e	a	a	a	b	a	e	d	a	a,c,d	a	a	a	e	a	a	a	a	a	c	c	b	b	d	b	d	5	5	4	5	5
Gorzkowice	gimnazjum	1	b	a	a	a	a	a	a	a	b	a	a	a	e	a		a	e	a	a	a	b	a	e	d	a	a,c,d	a	a	a	e	a	a	a	a	a	c	c	b	b	d	b	d	5	5	4	5	5
Gorzkowice	gimnazjum	1	b	a	a	a	a	a	a	a	b	a	a	a	e	b		a	e	a	a	a	b	a	f	f	a	a,b,d	a	a	c	c		a	a	a	a	a	c	b	b	d	b	c	4	4	3	4	5
Gorzkowice	gimnazjum	1	b	a	a	a	a	a	a	a	b	a	a	a	e	a		a	e	a	a	a	b	a	e	f	a	a,c,d	a	a	a	e	a	a	a	b	a	a	c	b	a	d	b	c	5	4	4	4	5
Gorzkowice	gimnazjum	1	b	a	a	a	a	a	a	a	b	a	a	a	c			a	e	a	a	a	b	a	e	d	a	a,b,c,d	a	a	a	c		a	a	a	a	a	b	b	c	d	a	d	5	5	5	5	5
Gorzkowice	gimnazjum	1	b	a	a	a	a	a	a	a	a	b	a	a	d			a	b	a	c	b	b	a	f	b	b			b	b	c		a	a	b	a	c	c	c	b	c	b	c	4	4	2	5	5
Gorzkowice	gimnazjum	1	a	c	a	a	a	a	a	a	b	a	a	a	d			a	b	a	c	c	b	a	f	b	b			c	a	c		a	a	b	a	c	c	b	c	d	b	c	5	4	4	5	4
Gorzkowice	gimnazjum	1	b	a	a	a	a	a	a	a	b	a	a	a	b			a	c	a	b	c	b	a	a	b	b			a	c	b		d	a	a	c	b	a	b	c	b	b	d	5	5	5	5	5
Gorzkowice	gimnazjum	1	b	a	a	a	a	a	a	a	b	a	a	a	b			a	e	a	a	a	e	a	e	f	c			c	a	b		c	a	a	a	b	b	b	b	d	a	a	3	3	3	3	3
Gorzkowice	gimnazjum	1	b	a	a	a	a	a	a	a	b	a	a	a	b			a	e	a	a	a	e	a	f	f	c			a	a	b		c	a	a	a	b	b	b	b	d	a	a	3	3	3	3	3
Gorzkowice	gimnazjum	1	b	a	a	a	a	a	a	a	b	a	a	a	e	a		a	e	a	a	a	e	a	e	f	a	a,b,c,d	a	c	a	e	a	c	a	a	a	d	c	c	b	c	b	a	4	3	2	1	1
Gorzkowice	gimnazjum	1	b	a	a	a	a	a	a	a	b	a	a	a	a			a	e	c	c	a	b	a	b	a	c			a	c	e	a	c	a	b	a	b	b	b	c	d	b	b	5	4	3	3	4
Gorzkowice	gimnazjum	1	b	a	a	a	a	a	a	a	b	a	a	a	e	c		a	e	c	c	c	b	a	b	a	c			a	c	e	a	a	a	b	a	b	b	b	c	d	b	c	5	4	3	3	4
Gorzkowice	gimnazjum	1	b	a	a	a	a	a	a	a	b	a	a	a	g			a	e	c	c	c	e	a	f	f	c			c	a	g		a	a	a	a	a	b	b	c	d	a	d	5	3	3	4	5
Gorzkowice	gimnazjum	1	b	a	a	a	a	a	a	a	b	a	a	a	e	c		a	c	c	c	c	b	a	f	f	a	b,c,d	a	c	c	g		a	a	a	a	b	b	b	b	d	a	c	5	4	3	4	4
Gorzkowice	gimnazjum	1	b	a	a	a	a	a	a	a	b	a	a	a	e	c	20	a	d	c	c	c	e	c	f	f	a	d	c	c	c	e	a	c	a	b	a	c	c	c	c	c	a	d	4	4	4	4	4
Gorzkowice	gimnazjum	1	b	a	a	a	a	a	a	a	b	a	a	a	c			a	e	a	c	a	b	a	a	f	a	c,d	c	a	a	c		a	a	a	a	b	c	c	a	d	a	c	5	4	2	4	5
Gorzkowice	gimnazjum	1	b	a	a	a	a	a	a	a	a	a	a	a	e	c		a	e	a	a	c	b	a	a	f	c			c	c	e	a	d	a	b	c	c	b	b	a	d	c	a	5	1	2	3	5
Gorzkowice	gimnazjum	1	b	a	a	a	a	a	a	a	b	a	a	a	c			a	e	a	c	a	b	a	a	f	a	c,d	c	a	a	c		a	a	a	a	b	c	c	a	d	a	c	5	4	2	4	5
Gorzkowice	gimnazjum	1	b	a	a	a	a	a	a	a	b	a	a	a	c			a	e	a	c	a	b	a	a	f	a	c,d	c	a	a	c		a	a	a	a	b	c	c	a	d	a	c	5	4	2	4	5
Gorzkowice	gimnazjum	1	b	a	a	a	a	a	a	a	a	a	a	a	e	c		a	e	a	a	c	b	a	a	f	c			c	c	e	a	d	a	b	c	c	b	b	a	d	c	a	5	1	2	3	5
Gorzkowice	gimnazjum	1	b	a	a	a	a	a	a	a	b	a	a	a	c			a	e	a	c	a	b	a	a	f	a	c,d	c	a	a	c		a	a	a	a	b	c	c	a	d	a	c	5	4	2	4	5
Gorzkowice	gimnazjum	1	b	a	a	a	a	a	a	a	b	a	a	a	e	a		a	e	a	a	a	b	a	f	f	c			c	a	e	a	a	a	b	a	b	c	b	b	d	b	d	5	4	5	5	5
Gorzkowice	gimnazjum	1	b	a	a	a	a	a	a	a	b	a	a	a	c			a	e	a	a	a	c	a	f	f	a	c	a	a	a	d	a	a	a	a	a	a	c	c	c	d	a	d	4	4	4	4	4
Gorzkowice	gimnazjum	1	b	a	a	a	a	a	a	a	b	a	a	a	c			a	e	a	a	a	b	b	e	e	b			b	b	c		a	a	a	a	c	c	c	b	d	a	d	5	4	2	5	5
Gorzkowice	gimnazjum	1	b	a	a	a	a	a	a	a	b	a	a	a	e	a		a	e	a	a	a	b	a	f	c	a	a,c,d	a	a	a	e	a	a	a	a	a	a	b	b	c	d	b	d	5	5	5	5	5
Gorzkowice	gimnazjum	1	b	a	a	a	a	a	a	a	b	a	a	a	e	c		a	e	a	a	a	a,b	a	f	f	c			a	a	e	d	a	a	b	a	b	c	b	b	d	b	d	5	4	4	5	5
Gorzkowice	gimnazjum	1	b	a	a	a	a	a	a	a	b	a	a	a	b			a	e	a	a	a	e	a	e	f	c			c	a	b		a	a	a	a	a	c	c	c	d	b	d	3	3	3	3	3
Gorzkowice	gimnazjum	1	b	a	a	a	a	a	a	a	a	a	a	a	e	c		a	e	a	c	c	b	a	b	f	a	a,b,c,d	a	a	c	g		c	a	b	a	b	b	b	b	d	a	d	5	5	3	4	5
Gorzkowice	gimnazjum	1	b	a	a	a	a	a	a	a	b	a	a	a	e	c		a	e	d	c	c	e	a	f	f	a	b,c,d	a	c	c	g		c	a	a	a	b	b	b	b	a	a	c	1	3	3	4	4
Gorzkowice	gimnazjum	1	b	a	a	a	a	a	a	a	b	a	a	a	e	c		a	c	c	c	c	b	a	f	f	a	b,c,d	a	c	c	g		a	a	a	a	b	b	b	b	d	a	c	5	4	3	4	4
Gorzkowice	gimnazjum	1	a	c	a	a	a	a	a	a	b	a	a	a	e	b		a	e	a	a	a	b	b	f	a	a	a,c	a	a	a	e	a	a	a	b	a	b	b	b	b	d	c	d	5	4	4	5	5
Gorzkowice	gimnazjum	1	b	a	a	a	a	a	a	a	a	a	a	a	c			a	e	a	a	a	e	c	f	f	c			c	c	c		c	a	a	a	a	c	c	c	d	b	c	4	4	4	4	3
Gorzkowice	gimnazjum	1	b	a	a	a	a	a	a	a	b	a	a	a	e	b	2	a	e	c	c	c	b	a	f	b	a	c	a	a	c	c		d	a	b	a	b	b	b	b	d	b	c	5	4	3	5	5
Gorzkowice	gimnazjum	1	b	a	a	a	a	a	a	a	b	a	a	a	e	a		a	e	a	a	a	b	a	f	f	c			c	a	e	a	a	a	b	a	b	c	b	b	d	b	d	5	4	5	5	5
Gorzkowice	gimnazjum	1	b	a	a	a	a	a	a	a	b	a	a	a	c			a	e	a	a	a	c	a	f	f	a	c	a	a	a	d	a	a	a	a	a	a	c	c	c	d	a	d	4	4	4	4	4
Szydłów	gimnazjum	1	b	a	a	a	a	a	a	a	b	a	a	a	c			a	e	a	a	a	b	b	e	e	b			b	b	c		a	a	a	a	c	c	c	b	d	a	d	5	4	2	5	5
Szydłów	gimnazjum	1	b	a	a	a	a	a	a	a	b	a	a	a	e	a		a	e	a	a	a	b	a	f	c	a	a,c,d	a	a	a	e	a	a	a	a	a	a	b	b	c	d	b	d	5	5	5	5	5
Szydłów	gimnazjum	1	b	a	a	a	a	a	a	a	b	a	a	a	e	c		a	e	a	a	a	a,b	a	f	f	c			a	a	e	d	a	a	b	a	b	c	b	b	d	b	d	5	4	4	5	5
Szydłów	gimnazjum	1	b	a	a	a	a	a	a	a	b	a	a	a	b			a	e	a	a	a	e	a	e	f	c			c	a	b		a	a	a	a	a	c	c	c	d	b	d	3	3	3	3	3
Szydłów	gimnazjum	1	b	a	a	a	a	a	a	a	a	a	a	a	e	c		a	e	a	c	c	b	a	b	f	a	a,b,c,d	a	a	c	g		c	a	b	a	b	b	b	b	d	a	d	5	5	3	4	5
Szydłów	gimnazjum	1	b	a	a	a	a	a	a	a	b	a	a	a	e	c		a	e	d	c	c	e	a	f	f	a	b,c,d	a	c	c	g		c	a	a	a	b	b	b	b	a	a	c	1	3	3	4	4
Szydłów	gimnazjum	1	b	a	a	a	a	a	a	a	b	a	a	a	e	c	5	a	c	c	c	c	b	a	f	f	a	b,c,d	a	c	c	g		a	a	a	a	b	b	b	b	d	a	c	5	4	3	4	4
Szydłów	gimnazjum	1	b	a	a	a	a	a	a	a	b	a	a	a	e	c	0	a	d	c	c	c	e	c	f	f	a	d	c	c	c	e	a	c	a	b	a	c	c	c	c	c	a	d	4	4	4	4	4
Szydłów	gimnazjum	1	b	a	a	a	a	a	a	a	b	a	a	a	g			a	c	c	c	c	e	c	f	f	c			c	a	e	b	c	a	b	b	b	c	c	c	d	b	c	4	4	4	4	4
Szydłów	gimnazjum	1	b	a	a	a	a	a	a	a	b	a	a	a	e	c	0	a	d	c	c	c	e	c	f	f	a	d	c	c	c	e	a	c	a	b	a	c	c	c	c	c	a	d	4	4	4	4	4
Szydłów	gimnazjum	1	b	a	a	a	a	a	a	a	a	b	a	a	e	c		a	c	c	a	a	e	c	f	f	c			c	c	g		a	a	a	a	b	b	c	b	d	b	c	4	3	3	3	3
Szydłów	gimnazjum	1	b	a	a	a	a	a	a	a	b	a	a	a	e	c	10	a	b	a	c	a	b	a	e	f	c			a	a	e	a	a	a	a	a	a	c	b	c	d	b	c	5	5	5	5	5
Szydłów	gimnazjum	1	b	a	a	a	a	a	a	a	a	a	a	a	e	c		a	b	a	c	a	b	a	f	b	a	a	b	c	a	e	a	b	b	a	a	a	c	b	a	d	b	d	5	5	3	5	5
Szydłów	gimnazjum	1	b	a	a	a	a	a	a	a	b	a	a	a	e	c		a	e	a	a	a	a	a	e	d	a	c	c	a	a	e	a	a	a	a	a	a	c	c	c	d	a	d	5	5	4	5	5
Szydłów	gimnazjum	1	b	a	a	a	a	a	a	a	a	b	a	a	e	b	5	a	d	a	a	a	b	c	a	a	a	a,b,c,d	b	c	c	g		a	a	b	a	b	c	b	b	c	c	c	4	3	3	4	4
Szydłów	gimnazjum	1	b	a	a	a	a	a	a	a	b	a	a	a	g			a	e	a	a	a	d	b	e	e	c			a	b	e	a	a	a	a	a	a	b	b	b	d	a	c	4	3	3	2	5
Szydłów	gimnazjum	1	b	a	a	a	a	a	a	a	b	a	a	a	e	a		a	e	a	a	a	b	a	e	d	a	a,c,d	a	a	a	e	a	a	a	a	a	c	c	b	b	d	b	d	5	5	4	5	5
Szydłów	gimnazjum	1	b	a	a	a	a	a	a	a	b	a	a	a	e	a		a	e	a	a	a	b	a	e	d	a	a,c,d	a	a	a	e	a	a	a	a	a	c	c	b	b	d	b	d	5	5	4	5	5
Szydłów	gimnazjum	1	b	a	a	a	a	a	a	a	b	a	a	a	e	b		a	e	a	a	a	b	a	f	f	a	a,b,d	a	a	c	c		a	a	a	a	a	c	b	b	d	b	c	4	4	3	4	5
Szydłów	gimnazjum	1	b	a	a	a	a	a	a	a	b	a	a	a	e	a		a	e	a	a	a	b	a	e	f	a	a,c,d	a	a	a	e	a	a	a	b	a	a	c	b	a	d	b	c	5	4	4	4	5
Szydłów	gimnazjum	1	b	a	a	a	a	a	a	a	b	a	a	a	c			a	e	a	a	a	b	a	e	d	a	a,b,c,d	a	a	a	c		a	a	a	a	a	b	b	c	d	a	d	5	5	5	5	5
Szydłów	gimnazjum	1	b	a	a	a	a	a	a	a	a	b	a	a	d			a	b	a	c	b	b	a	f	b	b			b	b	c		a	a	b	a	c	c	c	b	c	b	c	4	4	2	5	5
Szydłów	gimnazjum	1	b	a	a	a	a	a	a	a	b	a	a	a	e	b		a	b	a	a	a	b	b	f	a	a	a,b,c,d	a	b	a	e	a	c	a	a	a	a	c	c	c	d	b	d	5	5	4	5	5
Szydłów	gimnazjum	2	b	a	a	a	a	a	a	a	b	a	a	a	e	b		a	b	a	a	a	b	b	f	a	a	a,b,c,d	a	b	a	e	a	c	a	a	a	a	c	c	c	d	b	d	5	5	4	5	5
Szydłów	gimnazjum	2	b	a	a	a	a	a	a	a	b	a	a	a	e	b		a	b	a	a	a	b	b	f	a	a	a,b,c,d	a	b	a	e	a	c	a	a	a	a	c	c	c	d	b	d	5	5	4	5	5
Szydłów	gimnazjum	2	b	a	a	a	a	a	a	a	a	a	a	a	e	c		a	e	a	a	c	b	a	a	f	c			c	c	e	a	d	a	b	c	c	b	b	a	d	c	a	5	1	2	3	5
Szydłów	gimnazjum	2	b	a	a	a	a	a	a	a	a	a	a	a	e	c		a	e	a	a	c	b	a	a	f	c			c	c	e	a	d	a	b	c	c	b	b	a	d	c	a	5	1	2	3	5
Szydłów	gimnazjum	2	b	a	a	a	a	a	a	a	b	a	a	a	e	b		a	e	a	a	a	b	a	e	a	a	c,d	b	a	c	e	a	a	a	a	a	b	b	b	b	d	c	d	4	2	3	4	5
Szydłów	gimnazjum	2	b	a	a	a	a	a	a	a	b	a	a	a	e	b		a	e	a	a	a	b	a	f	a	a	a	c	c	a	e	b	a	a	a	a	a	b	b	b	d	a	d	5	5	4	3	5
Szydłów	gimnazjum	2	b	a	a	a	a	a	a	a	b	a	a	a	e	b		a	b	a	a	a	b	b	f	a	a	a,b,c,d	a	b	a	e	a	c	a	a	a	a	c	c	c	d	b	d	5	5	4	5	5
Szydłów	gimnazjum	2	b	a	a	a	a	a	a	a	b	a	a	a	e	b		a	b	a	a	a	b	b	f	a	a	a,b,c,d	a	b	a	e	a	c	a	a	a	a	c	c	c	d	b	d	5	5	4	5	5
Szydłów	gimnazjum	2	b	a	a	a	a	a	a	a	b	a	a	a	e	b		a	b	a	a	a	b	b	f	a	a	a,b,c,d	a	b	a	e	a	c	a	a	a	a	c	c	c	d	b	d	5	5	4	5	5
Szydłów	gimnazjum	2	b	a	a	a	a	a	a	a	a	a	a	a	e	c		a	e	a	a	c	b	a	a	f	c			c	c	e	a	d	a	b	c	c	b	b	a	d	c	a	5	1	2	3	5
Szydłów	gimnazjum	2	b	a	a	a	a	a	a	a	a	a	a	a	e	c		a	e	a	a	c	b	a	a	f	c			c	c	e	a	d	a	b	c	c	b	b	a	d	c	a	5	1	2	3	5
Szydłów	gimnazjum	2	b	a	a	a	a	a	a	a	b	a	a	a	e	b		a	e	a	a	a	b	a	e	a	a	c,d	b	a	c	e	a	a	a	a	a	b	b	b	b	d	c	d	4	2	3	4	5
Szydłów	gimnazjum	2	b	a	a	a	a	a	a	a	b	a	a	a	e	b		a	e	a	a	a	b	a	f	a	a	a	c	c	a	e	b	a	a	a	a	a	b	b	b	d	a	d	5	5	4	3	5
Szydłów	gimnazjum	2	b	a	a	a	a	a	a	a	b	a	a	a	e	a		a	e	a	a	a	a	a	e	e	a	c	a	a	a	c		c	a	a	a	a	b	b	b	d	b	d	5	5	3	5	5
Szydłów	gimnazjum	2	b	a	a	a	a	a	a	a	b	a	a	a	e	a		a	e	a	a	a	b	a	e	f	a	a,b,c,d	a	a	a	e	a	a	a	a	a	a	b	b	b	d	a	c	5	5	4	4	5
Szydłów	gimnazjum	2	b	a	a	a	a	a	a	a	b	a	a	a	e	a		a	a	a	a	a	b	a	e	f	a	a,b,c,d	a	a	a	e	a	a	a	a	a	a	b	b	b	d	a	c	5	5	4	4	5
Szydłów	gimnazjum	2	b	a	a	a	a	a	a	a	b	a	a	a	e	b		a	e	a	a	a	b	a	e	e	a	c,d	a	a	a	c		a	a	b	a	a	b	b	a	d	a	d	5	5	4	5	5
Szydłów	gimnazjum	2	b	a	a	a	a	a	a	a	b	a	a	a	d			a	e	c	b	a	e	a	f	f	a	d	a	a	c	a		a	b	a	a	a	b	b	c	d	a	d	3	4	3	2	3
Szydłów	gimnazjum	2	b	a	a	a	a	a	a	a	b	a	a	a	g			a	e	a	c	a	b	c	e	d	c			c	a	g		a	a	b	a	a	b	b	b	d	a	d	5	4	3	5	5
Szydłów	gimnazjum	2	b	a	a	a	a	a	a	a	b	a	a	a	e	b		a	e	c	c	c	b	a	a	c	a	a,c	a	c	a	e	a	a	a	b	a	a	b	b	b	d	a	d	5	4	4	5	5
Szydłów	gimnazjum	2	b	a	a	a	a	a	a	a	b	a	a	a	g			a	e	a	c	a	b	c	e	d	c			c	a	g		a	a	b	a	a	b	b	b	d	a	d	5	4	3	5	5
Szydłów	gimnazjum	2	b	a	a	a	a	a	a	a	b	a	a	a	e	b		a	e	c	c	c	b	a	a	c	a	a,c	a	c	a	e	a	a	a	b	a	a	b	b	b	d	a	d	5	4	4	5	5
Szydłów	gimnazjum	2	b	a	a	a	a	a	a	a	b	a	a	a	e	a		a	e	a	a	a	a	a	e	e	a	c	a	a	a	c		c	a	a	a	a	b	b	b	d	b	d	5	5	3	5	5
Szydłów	gimnazjum	2	b	a	a	a	a	a	a	a	b	a	a	a	e	a		a	e	a	a	a	b	a	e	f	a	a,b,c,d	a	a	a	e	a	a	a	a	a	a	b	b	b	d	a	c	5	5	4	4	5
Szydłów	gimnazjum	2	b	a	a	a	a	a	a	a	b	a	a	a	e	a		a	a	a	a	a	b	a	e	f	a	a,b,c,d	a	a	a	e	a	a	a	a	a	a	b	b	b	d	a	c	5	5	4	4	5
Szydłów	gimnazjum	2	b	a	a	a	a	a	a	a	b	a	a	a	e	b		a	e	a	a	a	b	a	e	e	a	c,d	a	a	a	c		a	a	b	a	a	b	b	a	d	a	d	5	5	4	5	5
Szydłów	gimnazjum	2	b	a	a	a	a	a	a	a	b	a	a	a	d			a	e	c	b	a	e	a	f	f	a	d	a	a	c	a		a	b	a	a	a	b	b	c	d	a	d	3	4	3	2	3
Szydłów	gimnazjum	2	a	c	a	a	a	a	a	a	a	g	a	a	e	c	6	a	e	b	a	b	d	c	c	c	a	b	a	b	a	d	c	b	a	a	c	d	b	c	b	a	a	b	2	3	1	4	3
Szydłów	gimnazjum	2	b	a	a	a	a	a	a	a	b	a	a	a	e	a		a	e	a	a	a	a	a	e	e	a	c	a	a	a	c		c	a	a	a	a	b	b	b	d	b	d	5	5	3	5	5
Szydłów	gimnazjum	2	b	a	a	a	a	a	a	a	b	a	a	a	e	b		a	b	c	c	c	b	b	a	a	a	b,c,d	a	c	a	c		a	a	a	a	b	c	b	b	d	a	d	5	5	3	4	5
Szydłów	gimnazjum	2	b	a	a	a	a	a	a	a	b	a	a	a	g			a	e	a	a	a	e	a	e	c	a	c	a	a	c	c		a	a	b	a	a	c	c	c	d	b	d	4	4	5	5	5
Szydłów	gimnazjum	2	b	a	a	a	a	a	a	a	b	a	a	a	e	a		a	e	b	a	a	a	a	e	e	a	a	a	c	b	c		c	a	b	a	a	c	c	c	d	b	a	4	5	4	4	5
Szydłów	gimnazjum	2	b	a	a	a	a	a	a	a	b	a	a	a	e	a		a	a	a	a	a	e	b	e	a	a	a	b	a	a	d	a	a	a	b	a	c	a	a	a	c	b	c	5	5	5	5	5
Szydłów	gimnazjum	2	b	a	a	a	a	a	a	a	b	a	a	a	b			a	e	a	a	a	e	a	e	f	c			c	a	b		a	a	a	a	a	c	b	c	d	b	d	1	1	1	1	1
Szydłów	gimnazjum	2	b	a	a	a	a	a	a	a	b	a	a	a	g			a	e	a	a	a	e	a	e	c	a	c	a	a	c	c		a	a	b	a	a	c	c	c	d	b	d	4	4	5	5	5
Szydłów	gimnazjum	3	b	a	a	a	a	a	a	a	b	a	a	a	e	a		a	e	b	a	a	a	a	e	e	a	a	a	c	b	c		c	a	b	a	a	c	c	c	d	b	a	4	5	4	4	5
Szydłów	gimnazjum	3	b	a	a	a	a	a	a	a	b	a	a	a	e	a		a	a	a	a	a	e	b	e	a	a	a	b	a	a	d	a	a	a	b	a	c	a	a	a	c	b	c	5	5	5	5	5
Szydłów	gimnazjum	3	b	a	a	a	a	a	a	a	b	a	a	a	b			a	e	a	a	a	e	a	e	f	c			c	a	b		a	a	a	a	a	c	b	c	d	b	d	1	1	1	1	1
Szydłów	gimnazjum	3	b	a	a	a	a	a	a	a	b	a	a	a	e	c		a	e	c	c	c	e	a	e	a	a	a,b,c,d	a	c	a	c		a	a	a	a	b	c	b	b	a	b	b	4	3	3	4	5
Szydłów	gimnazjum	3	b	a	a	a	a	a	a	a	b	a	a	a	c			a	b	a	a	a	a	a	f	a	a	c,d	a	c	a	a		a	b	b	a	b	c	b	b	d	b	d	5	4	3	5	5
Szydłów	gimnazjum	3	b	a	a	a	a	a	a	a	b	a	a	a	g			a	e	c	c	c	e	a	e	a	a	a,b,c,d	b	c	b	c		a	a	b	b	b	c	b	b	d	b	d	5	4	3	5	5
Szydłów	gimnazjum	3	b	a	a	a	a	a	a	a	b	a	a	a	g			a	e	a	a	a	e	a	e	c	a	c	a	a	c	c		a	a	b	a	a	c	c	c	d	b	d	4	4	5	5	5
Szydłów	gimnazjum	3	b	a	a	a	a	a	a	a	b	a	a	a	e	a		a	e	b	a	a	a	a	e	e	a	a	a	c	b	c		c	a	b	a	a	c	c	c	d	b	a	4	5	4	4	5
Szydłów	gimnazjum	3	b	a	a	a	a	a	a	a	a	f	a	a	e	a	100	a	e	a	a	a	a	a	e	e	a	c	a	a	b	f		c	a	b	a	a	b	b	b	d	b	d	5	5	5	4	4
Szydłów	gimnazjum	3	b	a	a	a	a	a	a	a	b	a	a	a	g			a	e	a	a	a	a	a	f	e	a	a,b,c,d	a	a	b	f		c	b	a	a	b	c	b	b	a	b	a	4	3	3	3	4
Szydłów	gimnazjum	3	b	a	a	a	a	a	a	a	b	a	a	a	e	b		a	e	a	a	a	a	a	f	d	a	b	c	b	b	g		c	a	b	a	c	c	c	b	d	b	c	4	4	3	4	4
Szydłów	gimnazjum	3	b	a	a	a	a	a	a	a	b	a	a	a	e	c		a	e	c	c	c	a,b	b	b	f	a	a,b,c,d	c	a	a	e	a	a	a	b	b	b	c	b	c	d	b	c	5	4	3	4	4
Szydłów	gimnazjum	3	b	a	a	a	a	a	a	a	b	a	a	a	e	a		a	e	a	a	a	a	c	f	f	c			c	b	f		a	a	b	a	c	c	c	c	d	a	c	5	4	3	4	4
Szydłów	gimnazjum	3	b	a	a	a	a	a	a	a	b	a	a	a	g			a	d	a	a	a	b	b	d	d	a	a,b,c,d	c	b	a	f		a	a	b	a	b	b	b	c	d	b	d	5	5	4	2	5
Szydłów	gimnazjum	3	b	a	a	a	a	a	a	a	b	a	a	a	e	b		a	e	a	a	a	a,b,c,d	c	f	f	a	a,b,c,d	a	a	a	f		a	a	a	a	a	c	b	b	a	a	c	5	5	3	5	5
Szydłów	gimnazjum	3	b	a	a	a	a	a	a	a	b	a	a	a	e	b		a	e	a	a	a	a	a	f	d	a	b	c	b	b	g		c	a	b	a	c	c	c	b	d	b	c	4	4	3	4	4
Szydłów	gimnazjum	3	b	a	a	a	a	a	a	a	b	a	a	a	e	c		a	e	c	c	c	a,b	b	b	f	a	a,b,c,d	c	a	a	e	a	a	a	b	b	b	c	b	c	d	b	c	5	4	3	4	4
Szydłów	gimnazjum	3	b	a	a	a	a	a	a	a	b	a	a	a	e	b		a	c	c	c	c	e	a	b	b	c			c	c	e	a	a	c	b	a	b	c	c	b	c	b	c	4	4	3	4	4
Szydłów	gimnazjum	3	b	a	a	a	a	a	a	a	b	a	a	a	e	a		a	e	a	a	a	b	a	e	f	a	a,b,c,d	a	a	a	e	a	c	a	b	a	a	b	b	a	d	a	d	1	1	1	4	4
Szydłów	gimnazjum	3	b	a	a	a	a	a	a	a	b	a	a	a	e	b		a	e	a	a	a	b	a	e	f	a	a,b,c,d	a	a	a	e	a	a	a	a	a	a	c	c	c	d	b	d	5	5	4	4	5
Szydłów	gimnazjum	3	b	a	a	a	a	a	a	a	b	a	a	a	e	a		a	e	a	a	a	b	a	e	c	a	a,c,d	a	c	a	e	a	a	a	a	a	c	c	b	b	d	b	d	5	5	4	4	5
Szydłów	gimnazjum	3	b	a	a	a	a	a	a	a	b	a	a	a	e	c		a	e	a	a	a	b	b	f	f	a	b,c,d	a	b	a	e	a	a	a	a	a	b	b	b	b	d	a	d	5	4	4	4	5
Szydłów	gimnazjum	3	b	a	a	a	a	a	a	a	b	a	a	a	e	a		a	e	c	a	a	b	a	f	f	a	c	a	a	b	c		c	a	a	b	a	c	c	a	a	a	c	5	4	3	5	5
Szydłów	gimnazjum	3	b	a	a	a	a	a	a	a	b	a	a	a	e	a		a	e	c	a	a	b	a	f	f	a	c	a	a	b	c		c	a	a	b	a	c	c	a	a	a	c	5	4	3	5	5
Szydłów	gimnazjum	3	b	a	a	a	a	a	a	a	b	a	a	a	a			a	e	a	a	a	b	b	e	f	a	b,d	b	c	a	c		d	a	b	a	a	a	a	c	c	c	c	1	2	3	4	4
Szydłów	gimnazjum	3	b	a	a	a	a	a	a	a	b	a	a	a	e	a		a	e	a	a	a	e	a	f	f	a	a,b,c	a	a	a	e	a	a	a	b	a	b	c	b	b	a	b	d	5	5	4	4	5
Szydłów	gimnazjum	3	b	a	a	a	a	a	a	a	b	a	a	a	e	a		a	e	a	a	a	b	c	f	f	a	b,d	a	a	a	e	a	a	a	a	a	b	b	b	a	d	a	d	5	4	5	5	4
Szydłów	gimnazjum	2	a	d	g	e	g	b	c	b	a	c	f	d	e	b		b		c	c	c	e	a	e	a	a	a,c	c	c	b	g		c	c	a	d	d	c	c	b	d	b	d	4	4	4	4	4
Szydłów	gimnazjum	2	a	d	g	d	b	b	e	c	a	a	b	d	e	a		b		a	a	c	b	a	a	a	a	b	c	c	c	g		b	c	a	d	c	c	c	c	d	c	d	4	4	3	4	4
Szydłów	gimnazjum	2	a	d	a	a	a	a	a	a	b	a	a	a	e	a	5	a	e	a	a	a	a,b	a	e	e	a	a,b,c,d	a	a	a	e	a	c	a	a	a	a	b	b	a	d	a	d	5	5	5	5	5
Szydłów	gimnazjum	2	a	b	a	a	a	a	a	a	b	a	a	a	e	c		a	a	a	c	c	e	c	f	f	a	a,b,d	a	c	c	e	b	a	a	a	a	b	c	b	b	d	c	c	5	5	3	4	5
Szydłów	gimnazjum	2	a	b	a	a	a	a	a	a	b	a	a	a	e	a		a	a	c	a	a	e	c	a	a	a	a,b	a	b	c	g		c	a	b	a	a	c	c	c	a	c	a	5	5	3	3	5
Szydłów	gimnazjum	2	a	d	a	a	a	a	a	a	b	a	a	a	e	b		a	b	a	a	a	b	b	a	a	a	a	c	c	b	g		b	a	b	a	a	b	b	b	d	a	c	5	4	3	5	5
Szydłów	gimnazjum	2	a	d	a	a	a	a	a	a	b	a	a	a	e	b		a	b	a	a	a	b	b	a	a	a	a	c	c	b	g		d	a	a	a	b	b	b	b	d	a	d	5	4	3	4	5
Szydłów	gimnazjum	2	a	e	a	a	a	a	a	a	a	f	a	a	e	b		a	a	c	a	a	b	a	a	a	b			c	a	e	a	b	c	a	c	c	b	c	c	c	b	b	4	4	3	3	2
Szydłów	gimnazjum	2	a	e	a	a	a	a	a	a	a	a	a	a	g			a	e	a	a	a	a	a	f	a	a	b	a	a	c	g		b	b	a	b	c	b	b	c	d	a	c	5	5	4	5	5
Szydłów	gimnazjum	2	a	e	a	a	a	a	a	a	a	a	a	a	e	b	4	a	c	c	a	c	b	b	f	a	a	a	c	c	b	f		a	a	a	a	c	c	b	c	d	b	c	5	4	4	4	5
Szydłów	gimnazjum	2	a	e	a	a	a	a	a	a	a	b	a	a	e	b	7	a	d	c	a	a	e	c	f	a	c			c	c	g		a	a	a	a	b	c	c	c	d	b	c	5	4	3	5	5
Szydłów	gimnazjum	2	a	b	a	a	a	a	a	a	b	a	a	a	g			a	d	a	c	c	b	b	f	b	a	a,c	b	b	b	g		a	a	a	a	a	b	b	c	d	c	d	5	5	5	5	5
Szydłów	gimnazjum	2	a	e	a	a	a	a	a	a	a	a	a	a	d			a	a	a	a	c	b	a	a	a	a	b,c,d	a	a	a	a		b	b	b	c	c	c	b	b	d	b	d	5	5	5	5	5
Szydłów	gimnazjum	2	a	e	a	a	a	a	a	a	a	a	a	a	d			a	a	a	a	c	b	a	a	a	a	b,c,d	a	a	a	a		b	b	b	c	c	c	b	b	d	b	d	5	5	5	5	5
Szydłów	gimnazjum	2	a	e	a	a	a	a	a	a	b	a	a	a	g			a	e	a	a	c	e	c	f	f	c			a	a	c		a	a	b	d	d	a	b	b	d	b	d	4	4	4	4	4
Szydłów	gimnazjum	2	a	e	a	a	a	a	a	a	a	a	a	a	g			a	b	c	c	c	e	a	f	a	a	a	c	c	b	b		c	a	a	b	a	a	a	a	a	b	c	5	5	5	5	5
Szydłów	gimnazjum	2	a	e	a	a	a	a	a	a	b	a	a	a	c			a	a	c	c	c	e	c	b	a	c			a	c	d	a	a	a	a	a	a	b	b	b	d	b	d	4	5	4	5	5
Szydłów	gimnazjum	2	a	e	a	a	a	a	a	a	a	a	a	a	g			a	b	c	c	c	e	a	f	a	a	a	c	c	b	b		c	a	a	b	a	a	a	a	a	b	c	5	5	5	5	5
Szydłów	gimnazjum	2	a	e	a	a	a	a	a	a	b	a	a	a	c			a	a	c	c	c	e	c	b	a	c			a	c	d	a	a	a	a	a	a	b	b	b	d	b	d	4	5	4	5	5
Szydłów	gimnazjum	2	a	e	a	a	a	a	a	a	a	a	a	a	g			a	b	c	c	c	e	a	f	a	a	a	c	c	b	b		c	a	a	b	a	a	a	a	a	b	c	5	5	5	5	5
Szydłów	gimnazjum	2	a	e	a	a	a	a	a	a	a	a	a	a	g			a	b	c	c	c	e	a	f	a	a	a	c	c	b	b		c	a	a	b	a	a	a	a	a	b	c	5	5	5	5	5
Szydłów	gimnazjum	2	a	e	a	a	a	a	a	a	b	a	a	a	g			a	e	a	a	c	e	c	f	f	c			a	a	c		a	a	b	d	d	a	b	b	d	b	d	4	4	4	4	4
Szydłów	gimnazjum	2	a	e	a	a	a	a	a	a	b	a	a	a	g			a	e	a	a	c	e	c	f	f	c			a	a	c		a	a	b	d	d	a	b	b	d	b	d	4	4	4	4	4
Szydłów	gimnazjum	2	a	e	a	a	a	a	a	a	b	a	a	a	g			a	e	a	a	c	e	c	f	f	c			a	a	c		a	a	b	d	d	a	b	b	d	b	d	4	4	4	4	4
Szydłów	gimnazjum	2	b	a	a	a	a	a	a	a	b	a	a	a	e	c		a	e	a	c	c	e	c	e	f	a	a,b,c	a	a	c	e	a	c	a	a	a	c	c	c	c	d	b	d	5	4	3	4	4
Szydłów	gimnazjum	2	b	a	a	a	a	a	a	a	b	a	a	a	e	a	5	a	c	a	a	a	b	a	b	b	a	b,c,d	a	a	c	g		c	a	a	a	b	c	c	a	d	b	d	5	5	5	5	5
Szydłów	gimnazjum	2	a	e	g	d	b	e	e	d	a	b	e	f	e	a		b	a	a	a	a	b	a	f	e	a	b,c,d	a	c	a	e	b	a	d	a	c	d	c	b	b	d	b	d	5	5	4	4	5
Szydłów	gimnazjum	2	a	e	g	d	b	b	e	e	a	a	b	f	e	a		a	e	a	a	a	b	c	f	f	a	a,b,c,d	c	a	a	e	a	c	c	a	c	d	c	b	c	d	c	c	5	5	4	5	5
Szydłów	gimnazjum	3	a	e	a	a	a	a	a	a	a	f	a	a	e	b		a	a	c	a	a	b	a	a	a	b			c	a	e	a	b	c	a	c	c	b	c	c	c	b	b	4	4	3	3	2
Szydłów	gimnazjum	3	a	e	d	b	d	b	g	e	a	d	f	d	c			b		a	a	a	b	b	e	a	c			a	a	d	b	a	c	b	c	c	c	b	b	d	c	d	5	5	5	5	5
Szydłów	gimnazjum	3	a	e	a	a	a	a	a	a	a	b	a	a	b			a	e	a	a	a	a	a	a	a	a	a	a	a	a	d	c	c	a	b	a	c	b	b	b	b	b	a	5	4	3	5	5
Szydłów	gimnazjum	3	a	e	b	b	b	c	e	d	a	f	f	f	e	b		a	a	c	a	a	b	a	a	a	b			c	a	e	a	b	c	a	c	c	b	c	c	c	b	b	4	4	3	3	2
Szydłów	gimnazjum	3	a	e	a	a	a	a	a	a	a	d	a	a	c			a	e	a	a	a	b	b	e	a	c			a	a	d	b	a	a	b	a	c	c	b	b	d	c	d	5	5	5	5	5
Szydłów	gimnazjum	3	a	e	e	b	d	b	g	e	a	b	b	g5	b			b		a	a	a	a	a	a	a	a	a	a	a	a	d	c	c	c	b	c	c	b	b	b	b	b	a	5	4	3	5	5
Szydłów	gimnazjum	3	a	e	b	b	b	c	e	d	a	f	f	f	e	b		a	a	c	a	a	b	a	a	a	b			c	a	e	a	b	c	a	c	c	b	c	c	c	b	b	4	4	3	3	2
Szydłów	gimnazjum	3	a	e	d	b	d	b	g	e	a	d	f	d	c			b		a	a	a	b	b	e	a	c			a	a	d	b	a	c	b	c	c	c	b	b	d	c	d	5	5	5	5	5
Szydłów	gimnazjum	3	a	e	a	a	a	a	a	a	a	b	a	a	b			a	e	a	a	a	a	a	a	a	a	a	a	a	a	d	c	c	a	b	a	c	b	b	b	b	b	a	5	4	3	5	5
Szydłów	gimnazjum	3	a	e	b	b	b	c	e	d	a	f	f	f	e	b		a	a	c	a	a	b	a	a	a	b			c	a	e	a	b	c	a	c	c	b	c	c	c	b	b	4	4	3	3	2
Szydłów	gimnazjum	3	a	e	d	b	d	b	g	e	a	d	f	d	c			b		a	a	a	b	b	e	a	c			a	a	d	b	a	c	b	c	c	c	b	b	d	c	d	5	5	5	5	5
Szydłów	gimnazjum	3	a	e	a	a	a	a	a	a	a	b	a	a	b			a	e	a	a	a	a	a	a	a	a	a	a	a	a	d	c	c	a	b	a	c	b	b	b	b	b	a	5	4	3	5	5
Szydłów	gimnazjum	3	a	e	a	a	a	a	a	a	a	f	a	a	e	b		a	a	c	a	a	b	a	a	a	b			c	a	e	a	b	c	a	c	c	b	c	c	c	b	b	4	4	3	3	2
Szydłów	gimnazjum	3	a	e	d	b	d	b	g	e	a	d	f	d	c			b		a	a	a	b	b	e	a	c			a	a	d	b	a	c	b	c	c	c	b	b	d	c	d	5	5	5	5	5
Szydłów	gimnazjum	3	a	e	a	a	a	a	a	a	a	b	a	a	b			a	e	a	a	a	a	a	a	a	a	a	a	a	a	d	c	c	a	b	a	c	b	b	b	b	b	a	5	4	3	5	5
Szydłów	gimnazjum	3	a	e	e	d	b	h	e	e	a	f	f	d	d			b		c	c	c	d	a	c	a	a	a,b	c	a	b	g		d	c	a	d	b	b	b	b	d	c	d	5	4	3	2	5
Szydłów	gimnazjum	3	a	d	a	a	a	a	a	a	a	a	a	a	d			a	b	c	c	c	c	c	f	f	c			c	c	c		c	a	a	a	c	c	c	c	c	c	d	5	5	3	4	5
Szydłów	gimnazjum	3	a	e	e	d	b	e	e	d	a	b	c	g2	g			b		c	c	c	e	c	f	f	c			c	c	g		e	d	a	c	c	c	c	c	c	a	d	4	4	4	4	4
Szydłów	gimnazjum	3	a	e	e	d	b	h	e	e	a	f	f	d	d			b		c	c	c	d	a	c	a	a	a,b	c	a	b	g		d	c	a	d	b	b	b	b	d	c	d	5	4	3	2	5
Szydłów	gimnazjum	3	a	d	a	a	a	a	a	a	a	a	a	a	d			a	b	c	c	c	c	c	f	f	c			c	c	c		c	a	a	a	c	c	c	c	c	c	d	5	5	3	4	5
Szydłów	gimnazjum	3	a	e	e	d	b	e	e	d	a	b	c	g2	g			b		c	c	c	e	c	f	f	c			c	c	g		e	d	a	c	c	c	c	c	c	a	d	4	4	4	4	4
Szydłów	gimnazjum	3	a	e	e	d	b	h	e	e	a	f	f	d	d			b		c	c	c	d	a	c	a	a	a,b	c	a	b	g		d	c	a	d	b	b	b	b	d	c	d	5	4	3	2	5
Szydłów	gimnazjum	3	a	d	b	b	b	c	b	e	a	a	c	d	d			b	b	c	c	c	c	c	f	f	c			c	c	c		c	c	a	c	c	c	c	c	c	c	d	5	5	3	4	5
Szydłów	gimnazjum	3	a	e	e	d	b	e	e	d	a	b	c	g2	g			b		c	c	c	e	c	f	f	c			c	c	g		e	d	a	c	c	c	c	c	c	a	d	4	4	4	4	4
Szydłów	gimnazjum	3	a	e	e	d	b	h	e	e	a	f	f	d	d			b		c	c	c	d	a	c	a	a	a,b	c	a	b	g		d	c	a	d	b	b	b	b	d	c	d	5	4	3	2	5
Szydłów	gimnazjum	3	a	d	b	b	b	c	b	e	a	a	c	d	d			b	b	c	c	c	c	c	f	f	c			c	c	c		c	c	a	c	c	c	c	c	c	c	d	5	5	3	4	5
Szydłów	gimnazjum	3	a	e	e	d	b	e	e	d	a	b	c	g2	g			b		c	c	c	e	c	f	f	c			c	c	g		e	d	a	c	c	c	c	c	c	a	d	4	4	4	4	4
Szydłów	gimnazjum	3	a	e	e	d	b	h	e	e	a	f	f	d	d			b		c	c	c	d	a	c	a	a	a,b	c	a	b	g		d	c	a	d	b	b	b	b	d	c	d	5	4	3	2	5
Szydłów	gimnazjum	3	a	d	a	a	a	a	a	a	a	a	a	a	d			a	b	c	c	c	c	c	f	f	c			c	c	c		c	a	a	a	c	c	c	c	c	c	d	5	5	3	4	5
Szydłów	gimnazjum	3	a	e	e	d	b	e	e	d	a	b	c	g2	g			b		c	c	c	e	c	f	f	c			c	c	g		e	d	a	c	c	c	c	c	c	a	d	4	4	4	4	4
Szydłów	gimnazjum	3	a	e	e	d	b	h	e	e	a	f	f	d	d			b		c	c	c	d	a	c	a	a	a,b	c	a	b	g		d	c	a	d	b	b	b	b	d	c	d	5	4	3	2	5
Szydłów	gimnazjum	3	a	d	a	a	a	a	a	a	a	a	a	a	d			a	b	c	c	c	c	c	f	f	c			c	c	c		c	a	a	a	c	c	c	c	c	c	d	5	5	3	4	5
Szydłów	gimnazjum	3	a	e	e	d	b	e	e	d	a	b	c	g2	g			b		c	c	c	e	c	f	f	c			c	c	g		e	d	a	c	c	c	c	c	c	a	d	4	4	4	4	4
Szydłów	gimnazjum	3	a	d	g	d	b	e	e	d	b	a	f	d	e	c		b		c	c	c	b,c	c	b	f	a	b	c	c	c	g		b	d	a	d	d	c	b	c	d	c	c	4	3	3	5	5
Szydłów	gimnazjum	3	a	e	g	d	b	e	e	d	a	b	e	f	e	a		b	a	a	a	a	b	a	f	e	a	b,c,d	a	c	a	e	b	a	d	a	c	d	c	b	b	d	b	d	5	5	4	4	5
Szydłów	gimnazjum	3	a	d	g	d	b	e	e	d	b	a	f	d	e	c		b		c	c	c	b,c	c	b	f	a	b	c	c	c	g		b	d	a	d	d	c	b	c	d	c	c	4	3	3	5	5
Szydłów	gimnazjum	3	a	f	g	d	b	e	e	d	a	b	e	f	e	a		b	a	a	a	a	b	a	f	e	a	b,c,d	a	c	a	e	b	a	d	a	c	d	c	b	b	d	b	d	5	5	4	4	5
Szydłów	gimnazjum	3	a	f	g	g	g	h4	e	f	a	g	c	b	d			d	c	b	b	b	d	b	e	a	a	b	a	a	a	c		a	d	b	d	d	a	a	b	a	d	a	1	1	1	1	1
Szydłów	gimnazjum	3	a	f	g	e	b	b	c	e	a	b	b	d	e	b	70	b	a	a	a	a	b	b	f	a	a	a,b,c,d	b	c	a	e	b	b	d	a	d	d	c	c	c	c	c	d	3	4	2	5	3
Szydłów	gimnazjum	3	a	f	g	g	g	h4	e	f	a	g	c	b	d			d	c	b	b	b	d	b	e	a	a	b	a	a	a	c		a	d	b	d	d	a	a	b	a	d	a	1	1	1	1	1
Brzoza	gimnazjum	3	b	a	a	a	a	a	a	a	b	a	a	a	e	a		a	e	a	a	a	b	a	e	f	a	b,c,d	a	a	a	e	a	a	a	a	a	a	b	b	b	d	a	d	5	5	4	4	5
Brzoza	gimnazjum	3	b	a	a	a	a	a	a	a	b	a	a	a	e	c		a	e	a	a	a	b	b	f	f	a	b,c,d	a	b	a	e	a	a	a	a	a	b	b	b	b	d	a	d	5	4	4	4	5
Brzoza	gimnazjum	3	b	a	a	a	a	a	a	a	b	a	a	a	e	c		a	e	a	a	a	b	a	f	f	a	b,c,d	a	b	a	e	a	a	a	a	a	a	b	b	b	d	a	d	5	4	4	5	5
Brzoza	gimnazjum	2	b	a	a	a	a	a	a	a	b	a	a	a	e	c		a	e	a	a	a	b	a	f	f	a	b,c,d	a	b	a	e	a	a	a	a	a	a	b	b	b	d	a	d	5	5	5	5	5
Brzoza	gimnazjum	2	b	a	a	a	a	a	a	a	b	a	a	a	e	a	5	a	e	c	a	a	b	a	f	d	a	b,c,d	a	c	c	g		a	c	a	a	b	b	b	c	d	a	c	5	4	2	5	5
Brzoza	gimnazjum	2	b	a	a	a	a	a	a	a	b	a	a	a	e	a	5	a	d	b	b	d	b	b	a	c	a	b	b	a	b	e	b	a	a	b	a	a	c	b	c	d	b	d	5	5	5	5	5
Brzoza	gimnazjum	2	b	a	a	a	a	a	a	a	b	a	a	a	d			a	e	c	c	c	e	a	f	f	c			c	c	g		d	a	b	a	c	b	b	b	d	b	d	5	3	3	4	5
Brzoza	gimnazjum	2	b	a	a	a	a	a	a	a	b	a	a	a	e	c	5−6	a	e	c	c	c	e	a	b	a	c			a	a	g		b	a	b	a	a	c	c	c	d	b	d	5	5	3	4	5
Brzoza	gimnazjum	2	b	a	a	a	a	a	a	a	b	a	a	a	a			a	b	a	a	a	b	a	b	b	a	b,c	a	a	c	e	a	b	a	b	a	a	c	b	b	d	b	b	5	5	4	4	5
Brzoza	gimnazjum	2	b	a	a	a	a	a	a	a	b	a	a	a	c			a	e	a	c	a	e	b	e	e	a	d	b	c	c	g		a	a	a	a	a	c	b	c	d	b	d	4	2	2	3	3
Brzoza	gimnazjum	2	b	a	a	a	a	a	a	a	b	a	a	a	d			a	e	a	a	a	b	a	a	f	a	a,b,c,d	c	a	a	c		a	a	a	a	b	c	c	b	d	b	c	4	5	1	5	5
Brzoza	gimnazjum	2	b	a	a	a	a	a	a	a	b	a	a	a	e	a		a	e	a	a	a	b	a	e	d	a	a,c,d	a	a	a	g		c	a	a	a	b	c	c	b	d	b	d	4	4	4	4	5
Brzoza	gimnazjum	2	b	a	a	a	a	a	a	a	b	a	a	a	e	a		a	e	a	a	a	b	a	e	f	a	a,b,c,d	a	a	a	e	a	a	a	a	a	a	b	b	a	d	b	c	1	1	5	5	5
Brzoza	gimnazjum	1	b	a	a	a	a	a	a	a	b	a	a	a	e	c		a	e	a	c	c	e	c	e	f	a	a,b,c	a	a	c	e	a	c	a	a	a	c	c	c	c	d	b	d	5	4	3	4	4
Brzoza	gimnazjum	1	b	a	a	a	a	a	a	a	b	a	a	a	e	a	5	a	c	a	a	a	b	a	b	b	a	b,c,d	a	a	c	g		c	a	a	a	b	c	c	a	d	b	d	5	5	5	5	5
Brzoza	gimnazjum	1	a	c	a	a	a	a	a	a	b	a	a	a	d			a	a	a	b	a	b	b	a	a	b			a	b	d	a	a	a	a	a	a	b	b	c	d	c	d	4	3	3	4	4
Brzoza	gimnazjum	1	a	c	a	a	a	a	a	a	b	a	a	a	d			a	a	a	b	a	b	b	a	a	b			a	b	d	a	a	a	a	a	a	b	b	c	d	c	d	4	3	3	4	4
Brzoza	gimnazjum	1	b	a	a	a	a	a	a	a	b	a	a	a	e	c		a	e	a	c	c	e	c	e	f	a	a,b,c	a	a	c	e	a	c	a	a	a	c	c	c	c	d	b	d	5	4	3	4	4
Brzoza	gimnazjum	1	b	a	a	a	a	a	a	a	b	a	a	a	e	a	5	a	c	a	a	a	b	a	b	b	a	b,c,d	a	a	c	g		c	a	a	a	b	c	c	a	d	b	d	5	5	5	5	5
Brzoza	gimnazjum	1	b	a	a	a	a	a	a	a	b	a	a	a	e	c		a	e	a	c	c	e	c	e	f	a	a,b,c	a	a	c	e	a	c	a	a	a	c	c	c	c	d	b	d	5	4	3	4	4
Brzoza	gimnazjum	1	b	a	a	a	a	a	a	a	b	a	a	a	e	c		a	e	a	c	c	e	c	e	f	a	a,b,c	a	a	c	e	a	c	a	a	a	c	c	c	c	d	b	d	5	4	3	4	4
Brzoza	gimnazjum	1	b	a	a	a	a	a	a	a	b	a	a	a	e	a		a	e	a	a	a	b	a	e	f	a	a,b,c,d	a	a	a	e	a	a	a	a	a	a	b	b	b	d	a	c	5	5	4	4	5
Brzoza	gimnazjum	1	b	a	a	a	a	a	a	a	b	a	a	a	e	a		a	a	a	a	a	b	a	e	f	a	a,b,c,d	a	a	a	e	a	a	a	a	a	a	b	b	b	d	a	c	5	5	4	4	5
Brzoza	gimnazjum	1	b	a	a	a	a	a	a	a	b	a	a	a	e	b		a	e	a	a	a	b	a	e	e	a	c,d	a	a	a	c		a	a	b	a	a	b	b	a	d	a	d	5	5	4	5	5
Brzoza	gimnazjum	1	b	a	a	a	a	a	a	a	b	a	a	a	d			a	e	c	b	a	e	a	f	f	a	d	a	a	c	a		a	b	a	a	a	b	b	c	d	a	d	3	4	3	2	3
Brzoza	gimnazjum	3	a	d	a	a	a	a	a	a	a	g	a	a	d			a	c	b	b	b	d	b	e	a	a	b	a	a	a	c		a	a	b	a	d	a	a	b	a	d	a	1	1	1	1	1
Brzoza	gimnazjum	3	a	e	g	d	b	e	e	d	a	b	e	f	e	a		b	a	a	a	a	b	a	f	e	a	b,c,d	a	c	a	e	b	a	d	a	c	d	c	b	b	d	b	d	5	5	4	4	5
Brzoza	gimnazjum	3	a	e	g	d	b	b	e	e	a	a	b	f	e	a		a	e	a	a	a	b	c	f	f	a	a,b,c,d	c	a	a	e	a	c	c	a	c	d	c	b	c	d	c	c	5	5	4	5	5
Brzoza	gimnazjum	3	a	d	g	d	b	e	e	d	b	a	f	d	e	c		b		c	c	c	b,c	c	b	f	a	b	c	c	c	g		b	d	a	d	d	c	b	c	d	c	c	4	3	3	5	5
Brzoza	gimnazjum	2	a	d	g	d	b	e	e	d	a	b	e	f	e	a		b	a	a	a	a	b	a	f	e	a	b,c,d	a	c	a	e	b	a	d	a	c	d	c	b	b	d	b	d	5	5	4	4	5
Brzoza	gimnazjum	1	a	d	a	a	a	a	a	a	b	a	a	a	g			a	e	a	a	a	b	a	f	e	a	b,c,d	c	a	c	f		a	a	b	a	c	c	b	c	d	b	c	4	4	3	3	5
Brzoza	gimnazjum	1	a	d	a	a	a	a	a	a	a	a	a	a	e	c	3	a	e	a	a	c	d	a	f	e	a	a,b,c,d	a	a	a	c		a	a	b	b	b	c	b	c	a	b	a	4	3	3	3	3
Brzoza	gimnazjum	1	a	d	a	a	a	a	a	a	a	a	a	a	e	a	3	a	e	a	a	a	e	a	f	f	a	b,c	c	c	a	e	a	a	a	a	a	a	c	b	a	d	b	d	3	3	3	3	3
Brzoza	gimnazjum	1	a	b	a	a	a	a	a	a	a	a	a	a	g			a	a	c	c	c	e	a	e	f	c			c	c	d	c	b	d	a	a	a	b	b	c	d	b	d	3	3	3	3	3
Brzoza	gimnazjum	1	a	c	a	a	a	a	a	a	a	c	a	a	g			a	a	b	b	b	d	c	a	a	b			b	b	f		b	d	b	d	d	a	b	b	a	d	a	5	5	5	5	3
Brzoza	gimnazjum	2	a	d	a	a	a	a	a	a	a	a	a	a	e	c	3	a	e	a	a	c	d	a	f	e	a	a,b,c,d	a	a	a	c		a	a	b	b	b	c	b	c	a	b	a	4	3	3	3	3
Brzoza	gimnazjum	2	a	d	a	a	a	a	a	a	a	a	a	a	e	a	3	a	e	a	a	a	e	a	f	f	a	b	c	a	a	e	a	a	a	a	a	a	c	b	a	d	b	d	3	3	3	3	3
Brzoza	gimnazjum	2	a	b	a	a	a	a	a	a	a	a	a	a	g			a	a	c	c	c	e	a	e	f	c			c	c	d	c	b	d	a	a	a	b	b	c	d	b	d	3	3	3	3	3
Brzoza	gimnazjum	2	a	b	a	a	a	a	a	a	b	a	a	a	g			a	a	a	c	c	e	c	e	e	c			b	b	g		a	a	a	a	a	b	b	c	d	a	c	3	2	4	2	5
Brzoza	gimnazjum	2	a	d	a	a	a	a	a	a	a	a	a	a	e	c	3	a	e	a	a	c	d	a	f	e	a	a,b,c,d	a	a	a	c		a	a	b	b	b	c	b	c	a	b	a	4	3	3	3	3
Brzoza	gimnazjum	2	a	d	a	a	a	a	a	a	a	a	a	a	e	a	3	a	e	a	a	a	e	a	f	f	a	b,c	c	c	a	e	a	a	a	a	a	a	c	b	a	d	b	d	3	3	3	3	3
Brzoza	gimnazjum	2	a	b	a	a	a	a	a	a	a	a	a	a	g			a	a	c	c	c	e	a	e	f	c			c	c	d	c	b	d	a	a	a	b	b	c	d	b	d	3	3	3	3	3
Brzoza	gimnazjum	3	a	d	a	a	a	a	a	a	a	e	a	a	e	c		a	b	a	a	a	b	a	f	a	a	a,b,c,d	c	a	a	g		a	a	a	b	c	b	b	a	d	b	b	5	4	3	4	4
Brzoza	gimnazjum	3	b	a	a	a	a	a	a	a	a	b	g	g4	e	b		a	a	a	c	a	e	c	f	b	a	a,b,c,d	a	a	c	d	a	b	d	b	d	d	c	c	c	c	c	c	3	4	2	3	5
Brzoza	gimnazjum	3	a	c	a	a	a	a	a	a	b	a	a	a	e	c		a	e	c	c	a	b	c	c	f	a	b	a	c	c	g		d	b	a	a	b	c	b	c	d	a	d	5	4	3	4	5
Brzoza	gimnazjum	3	a	c	a	a	a	a	a	a	a	a	a	a	e	c		a	c	a	a	a	a,b	a	b	f	a	a,b,c,d	a	a	c	g		a	b	a	a	c	b	b	b	d	a	c	5	5	3	4	5
Brzoza	gimnazjum	3	a	d	a	a	a	a	a	a	b	a	a	a	g			a	e	a	a	a	b	a	f	e	a	b,c,d	c	a	c	f		a	a	b	a	c	c	b	c	d	b	c	4	4	3	3	5
Brzoza	gimnazjum	3	a	d	a	a	a	a	a	a	a	b	a	a	c			a	d	c	c	c	e	c	f	a	c			c	c	c		c	a	b	a	c	c	c	b	c	a	d	5	4	3	4	4
Brzoza	gimnazjum	3	a	d	a	a	a	a	a	a	a	a	a	a	e	b	3	a	a	b	b	b	b	a	a	a	a	c,d	a	b	b	c		c	a	a	a	c	b	b	b	d	b	c	5	5	4	5	5
Brzoza	gimnazjum	3	a	d	a	a	a	a	a	a	b	a	a	a	e	b	20	a	c	a	c	a	b	c	b	a	a	a,c	b	a	a	c		a	a	a	b	c	c	b	b	d	b	d	4	4	4	4	4
Brzoza	gimnazjum	3	a	d	a	a	a	a	a	a	b	a	a	a	g			a	e	a	a	a	b	a	f	e	a	b,c,d	c	a	c	f		a	a	b	a	c	c	b	c	d	b	c	4	4	3	3	5
Łęki	gimnazjum	1	b	a	a	a	a	a	a	a	b	a	a	a	e	b		a	b	c	c	c	e	a	f	a	b			c	c	d	a	c	a	a	a	b	b	b	b	d	c	d	5	4	3	5	5
Łęki	gimnazjum	1	a	c	a	a	a	a	a	a	b	a	a	a	e	b		a	c	c	c	a	b	a	f	b	c			c	c	c		c	a	a	a	a	b	b	b	d	a	d	5	5	4	4	5
Łęki	gimnazjum	1	b	a	a	a	a	a	a	a	b	a	a	a	d			a	e	a	c	c	e	a	f	f	c			c	c	c		c	a	a	a	b	c	c	c	d	a	d	5	5	4	4	5
Łęki	gimnazjum	1	b	a	a	a	a	a	a	a	b	a	a	a	e	b		a	e	c	c	c	e	c	e	a	a	a,b,c	a	c	c	c		c	a	a	a	a	c	c	c	d	a	c	5	4	3	4	5
Łęki	gimnazjum	1	b	a	a	a	a	a	a	a	b	a	a	a	e	a		a	e	a	a	a	a	a	e	e	a	c	a	a	a	c		c	a	a	a	a	b	b	b	d	b	d	5	5	3	5	5
Łęki	gimnazjum	1	b	a	a	a	a	a	a	a	b	a	a	a	e	a		a	e	a	a	a	b	a	e	f	a	a,b,c,d	a	a	a	e	a	a	a	a	a	a	b	b	b	d	a	c	5	5	4	4	5
Łęki	gimnazjum	1	b	a	a	a	a	a	a	a	b	a	a	a	e	a		a	a	a	a	a	b	a	e	f	a	a,b,c,d	a	a	a	e	a	a	a	a	a	a	b	b	b	d	a	c	5	5	4	4	5
Łęki	gimnazjum	1	b	a	a	a	a	a	a	a	b	a	a	a	e	b		a	e	a	a	a	b	a	e	e	a	c,d	a	a	a	c		a	a	b	a	a	b	b	a	d	a	d	5	5	4	5	5
Łęki	gimnazjum	1	b	a	a	a	a	a	a	a	b	a	a	a	d			a	e	c	b	a	e	a	f	f	a	d	a	a	c	a		a	b	a	a	a	b	b	c	d	a	d	3	4	3	2	3
Łęki	gimnazjum	1	a	c	a	a	a	a	a	a	a	g	a	a	e	c	6	a	e	b	a	b	d	c	c	c	a	b	a	b	a	d	c	b	a	a	c	d	b	c	b	a	a	b	2	3	1	4	3
Łęki	gimnazjum	1	b	a	a	a	a	a	a	a	b	a	a	a	g			a	e	a	c	a	b	c	e	d	c			c	a	g		a	a	b	a	a	b	b	b	d	a	d	5	4	3	5	5
Łęki	gimnazjum	2	b	a	a	a	a	a	a	a	b	a	a	a	e	b		a	e	c	c	c	b	a	a	c	a	a,c	a	c	a	e	a	a	a	b	a	a	b	b	b	d	a	d	5	4	4	5	5
Łęki	gimnazjum	2	a	c	a	a	a	a	a	a	a	g	a	a	e	c	6	a	e	b	a	b	d	c	c	c	a	b	a	b	a	d	c	b	a	a	c	d	b	c	b	a	a	b	2	3	1	4	3
Łęki	gimnazjum	2	a	c	a	a	a	a	a	a	b	a	a	a	d			a	b	a	c	c	b	a	f	b	b			c	a	c		a	a	b	a	c	c	b	c	d	b	c	5	4	4	5	4
Łęki	gimnazjum	2	b	a	a	a	a	a	a	a	b	a	a	a	b			a	c	a	b	c	b	a	a	b	b			a	c	b		d	a	a	c	b	a	b	c	b	b	d	5	5	5	5	5
Łęki	gimnazjum	2	b	a	a	a	a	a	a	a	b	a	a	a	b			a	e	a	a	a	e	a	e	f	c			c	a	b		c	a	a	a	b	b	b	b	d	a	a	3	3	3	3	3
Łęki	gimnazjum	2	b	a	a	a	a	a	a	a	b	a	a	a	b			a	e	a	a	a	e	a	f	f	c			a	a	b		c	a	a	a	b	b	b	b	d	a	a	3	3	3	3	3
Łęki	gimnazjum	2	b	a	a	a	a	a	a	a	b	a	a	a	e	a		a	e	a	a	a	e	a	e	f	a	a,b,c,d	a	c	a	e	a	c	a	a	a	d	c	c	b	c	b	a	4	3	2	1	1
Łęki	gimnazjum	2	b	a	a	a	a	a	a	a	b	a	a	a	a			a	e	c	c	a	b	a	b	a	c			a	c	e	a	c	a	b	a	b	b	b	c	d	b	b	5	4	3	3	4
Łęki	gimnazjum	2	b	a	a	a	a	a	a	a	b	a	a	a	e	c		a	e	c	c	c	b	a	b	a	c			a	c	e	a	a	a	b	a	b	b	b	c	d	b	c	5	4	3	3	4
Łęki	gimnazjum	2	b	a	a	a	a	a	a	a	b	a	a	a	e	b	18	a	e	a	a	a	b	b	f	a	a	d	b	b	a	c		a	a	b	a	a	b	b	c	d	a	d	4	4	4	4	4
Łęki	gimnazjum	2	b	a	a	a	a	a	a	a	b	a	a	a	e	c	18	a	b	a	a	a	b	a	f	a	a	b,c,d	a	c	a	e	a	d	a	a	a	a	b	b	a	d	b	c	4	3	3	4	5
Łęki	gimnazjum	3	b	a	a	a	a	a	a	a	a	a	a	a	a			a	e	b	b	b	d	b	e	e	a	b	b	b	b	d	a	a	a	b	a	a	c	a	a	d	b	c	4	3	1	4	4
Łęki	gimnazjum	3	b	a	a	a	a	a	a	a	b	a	a	a	g			a	e	a	a	a	d	b	e	e	c			a	b	e	a	a	a	a	a	a	b	b	b	d	a	c	4	3	3	2	5
Łęki	gimnazjum	3	b	a	a	a	a	a	a	a	b	a	a	a	e	a		a	e	a	a	a	b	a	e	d	a	a,c,d	a	a	a	e	a	a	a	a	a	c	c	b	b	d	b	d	5	5	4	5	5
Łęki	gimnazjum	3	b	a	a	a	a	a	a	a	b	a	a	a	e	a		a	e	a	a	a	b	a	e	d	a	a,c,d	a	a	a	e	a	a	a	a	a	c	c	b	b	d	b	d	5	5	4	5	5
Łęki	gimnazjum	3	b	a	a	a	a	a	a	a	b	a	a	a	e	b		a	e	a	a	a	b	a	f	f	a	a,b,d	a	a	c	c		a	a	a	a	a	c	b	b	d	b	c	4	4	3	4	5
Łęki	gimnazjum	3	b	a	a	a	a	a	a	a	b	a	a	a	e	a		a	e	a	a	a	b	a	e	f	a	a,c,d	a	a	a	e	a	a	a	b	a	a	c	b	a	d	b	c	5	4	4	4	5
Łęki	gimnazjum	3	b	a	a	a	a	a	a	a	b	a	a	a	c			a	e	a	a	a	b	a	e	d	a	a,b,c,d	a	a	a	c		a	a	a	a	a	b	b	c	d	a	d	5	5	5	5	5
Łęki	gimnazjum	3	b	a	a	a	a	a	a	a	a	b	a	a	d			a	b	a	c	b	b	a	f	b	b			b	b	c		a	a	b	a	c	c	c	b	c	b	c	4	4	2	5	5
Łęki	gimnazjum	3	a	c	a	a	a	a	a	a	b	a	a	a	d			a	b	a	c	c	b	a	f	b	b			c	a	c		a	a	b	a	c	c	b	c	d	b	c	5	4	4	5	4
Łęki	gimnazjum	3	b	a	a	a	a	a	a	a	b	a	a	a	b			a	c	a	b	c	b	a	a	b	b			a	c	b		d	a	a	c	b	a	b	c	b	b	d	5	5	5	5	5
Łęki	gimnazjum	3	b	a	a	a	a	a	a	a	b	a	a	a	e	c		a	c	c	c	c	b	a	f	f	a	b,c,d	a	c	c	g		a	a	a	a	b	b	b	b	d	a	c	5	4	3	4	4
Łęki	gimnazjum	3	b	a	a	a	a	a	a	a	b	a	a	a	e	c	20	a	d	c	c	c	e	c	f	f	a	d	c	c	c	e	a	b	b	b	c	c	c	c	c	c	a	d	4	4	4	4	4
Łęki	gimnazjum	3	b	a	a	a	a	a	a	a	b	a	a	a	c			a	e	a	c	a	b	a	a	f	a	c,d	c	a	a	c		a	a	a	a	b	c	c	a	d	a	c	5	4	2	4	5
Łęki	gimnazjum	3	b	a	a	a	a	a	a	a	b	a	a	a	g			a	e	a	a	a	e	a	e	c	a	c	a	a	c	c		a	a	b	a	a	c	c	c	d	b	d	4	4	5	5	5
Łęki	gimnazjum	1	b	a	a	a	a	a	a	a	b	a	a	a	e	c		a	e	a	c	c	e	c	e	f	a	a,b,c	a	a	c	e	a	c	a	a	a	c	c	c	c	d	b	d	5	4	3	4	4
Łęki	gimnazjum	1	b	a	a	a	a	a	a	a	b	a	a	a	e	a	5	a	c	a	a	a	b	a	b	b	a	b,c,d	a	a	c	g		c	a	a	a	b	c	c	a	d	b	d	5	5	5	5	5
Łęki	gimnazjum	3	a	d	a	a	a	a	a	a	b	a	a	a	g			a	e	a	a	a	b	a	f	e	a	b,c,d	c	a	c	f		a	a	b	a	c	c	b	c	d	b	c	4	4	3	3	5
Łęki	gimnazjum	3	a	d	a	a	a	a	a	a	a	a	a	a	e	c	3	a	e	a	a	c	d	a	f	e	a	a,b,c,d	a	a	a	c		a	a	b	b	b	c	b	c	a	b	a	4	3	3	3	3
Łęki	gimnazjum	3	a	d	a	a	a	a	a	a	a	a	a	a	e	a	3	a	e	a	a	a	e	a	f	f	a	b,c	c	c	a	e	a	a	a	a	a	a	c	b	a	d	b	d	3	3	3	3	3
Łęki	gimnazjum	3	a	b	a	a	a	a	a	a	a	a	a	a	g			a	a	c	c	c	e	a	e	f	c			c	c	d	c	b	d	a	a	a	b	b	c	d	b	d	3	3	3	3	3
Łęki	gimnazjum	3	a	b	a	a	a	a	a	a	a	a	a	a	g			a	a	a	c	c	e	c	e	e	c			b	b	g		a	a	a	a	a	b	b	c	d	a	c	3	2	4	2	5
Łęki	gimnazjum	3	a	d	a	a	a	a	a	a	a	a	a	a	e	c	3	a	e	a	a	c	d	a	f	e	a	a,b,c,d	a	a	a	c		a	a	b	b	b	c	b	c	a	b	a	4	3	3	3	3
Łęki	gimnazjum	3	a	d	a	a	a	a	a	a	a	a	a	a	e	a	3	a	e	a	a	a	e	a	f	f	a	b	c	a	a	e	a	a	a	a	a	a	c	b	a	d	b	d	3	3	3	3	3
Łęki	gimnazjum	3	a	b	a	a	a	a	a	a	a	a	a	a	g			a	a	c	c	c	e	a	e	f	c			c	c	d	c	b	d	a	a	a	b	b	c	d	b	d	3	3	3	3	3
Łęki	gimnazjum	3	a	b	a	a	a	a	a	a	b	a	a	a	g			a	a	a	c	c	e	c	e	e	c			b	b	g		a	a	a	a	a	b	b	c	d	a	c	3	2	4	2	5
Łęki	gimnazjum	3	a	d	a	a	a	a	a	a	a	a	a	a	e	c	3	a	e	a	a	c	d	a	f	e	a	a,b,c,d	a	a	a	c		a	a	b	b	b	c	b	c	a	b	a	4	3	3	3	3
Łęki	gimnazjum	3	a	d	a	a	a	a	a	a	a	a	a	a	e	a	3	a	e	a	a	a	e	a	f	f	a	b,c	c	c	a	e	a	a	a	a	a	a	c	b	a	d	b	d	3	3	3	3	3
Łęki	gimnazjum	3	a	b	a	a	a	a	a	a	a	a	a	a	g			a	a	c	c	c	e	a	e	f	c			c	c	d	c	b	d	a	a	a	b	b	c	d	b	d	3	3	3	3	3
Łęki	gimnazjum	3	a	c	a	a	a	a	a	a	a	a	a	a	e	b		a	e	c	c	c	b	c	a	a	c			c	c	a		a	a	a	a	d	b	b	c	d	c	c	3	3	4	1	3
Łęki	gimnazjum	3	a	c	a	a	a	a	a	a	a	a	a	a	e	b		a	e	c	c	c	b	c	a	a	c			c	c	a		a	a	a	a	c	b	b	c	d	c	c	3	3	4	1	5
Łęki	gimnazjum	3	a	b	a	a	a	a	a	a	b	a	a	a	e	b		a	e	c	c	c	e	a	a	b	a	c,d	c	a	a	e	a	a	a	b	a	c	c	b	b	d	b	c	5	5	5	5	5
Łęki	gimnazjum	3	a	d	a	a	a	a	a	a	b	a	a	a	d			a	e	a	c	a	b	a	e	f	a	c,d	a	a	a	c		a	a	a	a	b	c	c	b	d	b	c	5	5	3	5	5
Łęki	gimnazjum	3	a	d	a	a	a	a	a	a	b	a	a	a	c			a	d	c	c	c	b	a	b	a	c			a	c	e	a	d	a	b	a	b	b	b	c	d	b	d	5	5	3	3	5
Łęki	gimnazjum	3	a	d	b	b	g	h16	a	d	b	a	b	f	e	b	10	a	e	c	c	c	e	a	a	a	b			b	c	c		d	b	b	b	d	c	c	c	d	b	d	4	2	3	3	4
Łęki	gimnazjum	3	a	d	a	a	a	a	a	a	b	a	a	a	c			a	d	c	c	c	b	a	b	a	c			a	c	e	a	d	a	b	a	b	b	b	c	d	b	d	5	5	3	3	5
Łęki	gimnazjum	3	a	c	a	a	a	a	a	a	b	a	a	a	e	b		a	d	c	c	c	b	b	a	a	c			c	a	e	a	a	b	a	a	b	c	c	b	d	b	c	5	4	3	5	5
Łęki	gimnazjum	3	a	d	e	b	c	b	e	c	a	a	c	d	e	b		b	a	c	c	c	b	b	a	a	a	c,d	b	a	a	d	a	a	c	b	d	d	c	c	c	c	b	a	4	1	1	1	5
Łęki	gimnazjum	3	a	d	a	a	a	a	a	a	a	a	a	a	e	b	18	a	d	a	a	c	b	c	f	a	a	a,c,d	c	c	a	d	a	a	a	a	a	c	c	c	b	d	b	c	5	4	3	4	5
Łęki	gimnazjum	3	a	d	a	a	a	a	a	a	b	a	a	a	g			a	e	a	a	a	e	a	a	b	a	a,b,c	a	c	a	d	b	a	a	a	a	b	b	b	b	d	b	d	4	4	3	4	4
Łęki	gimnazjum	3	a	d	a	a	a	a	a	a	b	a	a	a	g			a	e	a	a	a	e	a	a	b	a	a,b,c	a	c	a	d	b	a	a	a	a	b	b	b	b	d	b	d	4	4	3	4	4
Łęki	gimnazjum	3	a	d	a	a	a	a	a	a	b	a	a	a	g			a	e	a	a	a	e	a	a	b	a	a,b,c	a	c	a	d	b	a	a	a	a	b	b	b	b	d	b	d	4	4	3	4	4
Łęki	gimnazjum	3	a	d	a	a	a	a	a	a	b	a	a	a	g			a	e	a	a	a	e	a	a	b	a	a,b,c	a	c	a	d	b	a	a	a	a	b	b	b	b	d	b	d	4	4	3	4	4
Łęki	gimnazjum	2	a	c	e	e	b	e	e	e	b	a	b	f	e	b		b	c	c	c	c	e	b	a	a	a	d,e1	a	c	c	e	b	b	c	a	d	b	c	b	b	d	c	c	4	4	4	5	5
Łęki	gimnazjum	2	a	c	e	e	b	e	e	e	b	a	b	f	e	b		b	c	c	c	c	e	b	a	a	a	d,e1	a	c	c	e	b	b	c	a	d	b	c	b	b	d	c	c	4	4	4	5	5
Łęki	gimnazjum	2	a	d	e	b	c	b	e	c	a	a	c	d	e	b		b	a	c	c	c	b	b	a	a	a	c,d	b	a	a	d	a	a	c	b	d	d	c	c	c	c	b	a	4	1	1	1	5
Łęki	gimnazjum	2	a	d	a	a	a	a	a	a	a	a	a	a	e	b	18	a	d	a	a	c	b	c	f	a	a	a,c,d	c	c	a	d	a	a	a	a	a	c	c	c	b	d	b	c	5	4	3	4	5
Łęki	gimnazjum	2	a	d	e	b	c	b	e	c	a	a	c	d	e	b		b	a	c	c	c	b	b	a	a	a	c,d	b	a	a	d	a	a	c	b	d	d	c	c	c	c	b	a	4	1	1	1	5
Łęki	gimnazjum	2	a	c	a	a	a	a	a	a	b	a	a	a	e	c		a	e	c	c	a	b	c	c	f	a	b	a	c	c	g		d	b	a	a	b	c	b	c	d	a	d	5	4	3	4	5
Łęki	gimnazjum	2	a	c	a	a	a	a	a	a	a	a	a	a	e	c		a	c	a	a	a	a,b	a	b	f	a	a,b,c,d	a	a	c	g		a	b	a	a	c	b	b	b	d	a	c	5	5	3	4	5
Łęki	gimnazjum	2	a	d	a	a	a	a	a	a	b	a	a	a	c			a	e	a	c	c	e	c	f	f	a	a,b,c,d	c	c	c	c		a	a	a	a	a	c	b	c	d	b	d	4	4	3	4	4
Łęki	gimnazjum	2	a	d	e	d	b	h1	d	e	a	e	b	f	e	c		a	b	a	a	a	b	a	f	a	a	a,b,c,d	c	a	a	g		a	a	a	b	c	b	b	a	d	b	b	5	4	3	4	4
Łęki	gimnazjum	2	a	c	a	a	a	a	a	a	b	a	a	a	e	c		a	e	c	c	a	b	c	c	f	a	b	a	c	c	g		d	b	a	a	b	c	b	c	d	a	d	5	4	3	4	5
Łęki	gimnazjum	2	a	c	a	a	a	a	a	a	a	a	a	a	e	c		a	c	a	a	a	a,b	a	b	f	a	a,b,c,d	a	a	c	g		a	b	a	a	c	b	b	b	d	a	c	5	5	3	4	5
Łęki	gimnazjum	2	a	d	a	a	a	a	a	a	a	a	a	a	e	b	3	a	a	b	b	b	b	a	a	a	a	c,d	a	b	b	c		c	a	a	a	c	b	b	b	d	b	c	5	5	4	5	5
Łęki	gimnazjum	1	a	c	a	a	a	a	a	a	a	a	a	a	e	b	5	a	e	b	b	b	b	a	c	d	a	b,c,d	a	b	b	e	a	a	a	b	a	c	b	b	b	d	a	d	5	4	4	4	5
Łęki	gimnazjum	1	a	d	a	a	a	a	a	a	a	b	a	a	c			a	d	c	c	c	e	c	f	a	c			c	c	c		c	a	b	a	c	c	c	b	c	a	d	5	4	3	4	4
Łęki	gimnazjum	1	a	d	a	a	a	a	a	a	b	a	a	a	e	b	20	a	c	a	c	a	b	c	b	a	a	a,c	b	a	a	c		a	a	a	b	c	c	b	b	d	b	d	4	4	4	4	4
Łęki	gimnazjum	1	a	d	a	a	a	a	a	a	a	b	a	a	c			a	d	c	c	c	e	c	f	a	c			c	c	c		c	a	b	a	c	c	c	b	c	a	d	5	4	3	4	4
Łęki	gimnazjum	1	a	d	a	a	a	a	a	a	b	a	a	a	e	b	20	a	c	a	c	a	b	c	b	a	a	a,c	b	a	a	c		a	a	a	b	c	c	b	b	d	b	d	4	4	4	4	4
Łęki	gimnazjum	1	b	a	a	a	a	a	a	a	a	b	g	g4	e	b		a	a	a	c	a	e	c	f	b	a	a,b,c,d	a	a	c	d	a	b	d	b	d	d	c	c	c	c	c	c	3	4	2	3	5
Łęki	gimnazjum	1	a	d	a	a	a	a	a	a	b	a	a	a	g			a	e	a	a	a	b	a	f	e	a	b,c,d	c	a	c	f		a	a	b	a	c	c	b	c	d	b	c	4	4	3	3	5
Łęki	gimnazjum	1	a	d	a	a	a	a	a	a	a	a	a	a	e	c	3	a	e	a	a	c	d	a	f	e	a	a,b,c,d	a	a	a	c		a	a	b	b	b	c	b	c	a	b	a	4	3	3	3	3
Łęki	gimnazjum	1	a	d	a	a	a	a	a	a	a	a	a	a	e	a	3	a	e	a	a	a	e	a	f	f	a	b,c	c	c	a	e	a	a	a	a	a	a	c	b	a	d	b	d	3	3	3	3	3
Łęki	gimnazjum	1	a	b	a	a	a	a	a	a	a	a	a	a	g			a	a	c	c	c	e	a	e	f	c			c	c	d	c	b	d	a	a	a	b	b	c	d	b	d	3	3	3	3	3
Łęki	gimnazjum	1	a	b	a	a	a	a	a	a	b	a	a	a	g			a	a	a	c	c	e	c	e	e	c			b	b	g		a	a	a	a	a	b	b	c	d	a	c	3	2	4	2	5
Łęki	gimnazjum	1	a	d	a	a	a	a	a	a	a	a	a	a	e	c	3	a	e	a	a	c	d	a	f	e	a	a,b,c,d	a	c	a	c		a	a	b	b	b	c	b	c	a	b	a	4	3	3	3	3
Łęki	gimnazjum	1	b	a	a	a	a	a	a	a	b	a	a	a	e	c	10	a	b	a	c	a	b	a	e	f	c			a	a	e	a	a	a	a	a	a	c	b	c	d	b	c	5	5	5	5	5
Łęki	gimnazjum	2	b	a	a	a	a	a	a	a	a	a	a	a	e	c		a	b	a	c	a	b	a	f	b	a	a	b	c	a	e	a	b	b	a	a	a	c	b	a	d	b	d	5	5	3	5	5
Łęki	gimnazjum	2	b	a	a	a	a	a	a	a	b	a	a	a	e	c		a	e	a	a	a	a	a	e	d	a	c	c	a	a	e	a	a	a	a	a	a	c	c	c	d	a	d	5	5	4	5	5
Łęki	gimnazjum	2	b	a	a	a	a	a	a	a	b	a	a	a	e	c	10	a	b	a	c	a	b	a	e	f	c			a	a	e	a	a	a	a	a	a	c	b	c	d	b	c	5	5	5	5	5
Łęki	gimnazjum	2	b	a	a	a	a	a	a	a	a	a	a	a	e	c		a	b	a	c	a	b	a	f	b	a	a	b	c	a	e	a	b	b	a	a	a	c	b	a	d	b	d	5	5	3	5	5
Łęki	gimnazjum	2	b	a	a	a	a	a	a	a	b	a	a	a	e	c		a	e	a	a	a	a	a	e	d	a	c	c	a	a	e	a	a	a	a	a	a	c	c	c	d	a	d	5	5	4	5	5
Łęki	gimnazjum	2	b	a	a	a	a	a	a	a	b	a	a	a	e	c	10	a	b	a	c	a	b	a	e	f	c			a	a	e	a	a	a	a	a	a	c	b	c	d	b	c	5	5	5	5	5
Łęki	gimnazjum	2	b	a	a	a	a	a	a	a	b	a	a	a	e	c	10	a	b	a	c	a	b	a	e	f	c			a	a	e	a	a	a	a	a	a	c	b	c	d	b	c	5	5	5	5	5
Łęki	gimnazjum	2	b	a	a	a	a	a	a	a	a	a	a	a	e	c		a	b	a	c	a	b	a	f	b	a	a	b	c	a	e	a	b	b	a	a	a	c	b	a	d	b	d	5	5	3	5	5
Łęki	gimnazjum	2	b	a	a	a	a	a	a	a	b	a	a	a	e	c		a	e	a	a	a	a	a	e	d	a	c	c	a	a	e	a	a	a	a	a	a	c	c	c	d	a	d	5	5	4	5	5
Łęki	gimnazjum	2	b	a	a	a	a	a	a	a	b	a	a	a	e	c	10	a	b	a	c	a	b	a	e	f	c			a	a	e	a	a	a	a	a	a	c	b	c	d	b	c	5	5	5	5	5
Łęki	gimnazjum	2	b	a	a	a	a	a	a	a	b	a	a	a	e	c	10	a	b	a	c	a	b	a	e	f	c			a	a	e	a	a	a	a	a	a	c	b	c	d	b	c	5	5	5	5	5
Łęki	gimnazjum	3	a	d	g	d	c	e	e	e	a	c	e	f	e	b	18	b	a	a	a	a	a	a	e	a	a	c	c	a	a	c		a	c	a	d	c	c	b	b	d	c	d	5	3	5	5	5
Łęki	gimnazjum	3	a	e	g	c	b	b	e	a	b	a	b	d	c			a	d	a	c	c	e	c	f	d	c			a	a	d	a	c	b	b	c	c	c	b	b	d	b	d	1	1	1	1	1
Łęki	gimnazjum	3	a	d	a	a	a	a	a	a	a	c	a	a	e	b	18	a	a	a	a	a	a	a	e	a	a	c	c	a	a	c		a	a	a	a	c	c	b	b	d	c	d	5	3	5	5	5
Łęki	gimnazjum	3	a	e	a	a	a	a	a	a	a	a	a	a	c			a	d	a	c	c	e	c	f	d	c			a	a	d	a	d	a	b	a	c	c	b	b	d	b	d	1	1	1	1	1
Łęki	gimnazjum	2	a	d	g	c	b	c	e	e	a	e	c	d	e	c	10	c		c	c	c	e	c	f	f	a	e1	c	c	c	e	a	c	d	a	d	d	b	c	c	d	d	d	5	5	5	5	5
Rozprza	gimnazjum	1	b	a	a	a	a	a	a	a	b	a	a	a	e	c		a	e	a	c	c	e	c	e	f	a	a,b,c	a	a	c	e	a	c	a	a	a	c	c	c	c	d	b	d	5	4	3	4	4
Rozprza	gimnazjum	1	b	a	a	a	a	a	a	a	b	a	a	a	e	a		a	c	a	a	a	b	a	b	b	a	b,c,d	a	a	c	g		c	a	a	a	b	c	c	a	d	b	d	5	5	5	5	5
Rozprza	gimnazjum	1	a	c	a	a	a	a	a	a	b	a	a	a	d			a	a	a	b	a	b	b	a	a	b			a	b	d	a	a	a	a	a	a	b	b	c	d	c	d	4	3	3	4	4
Rozprza	gimnazjum	1	a	c	a	a	a	a	a	a	b	a	a	a	d			a	a	a	b	a	b	b	a	a	b			a	b	d	a	a	a	a	a	a	b	b	c	d	c	d	4	3	3	4	4
Rozprza	gimnazjum	1	b	a	a	a	a	a	a	a	b	a	a	a	e	c		a	e	a	c	c	e	c	e	f	a	a,b,c	a	a	c	e	a	c	a	a	a	c	c	c	c	d	b	d	5	4	3	4	4
Rozprza	gimnazjum	1	b	a	a	a	a	a	a	a	b	a	a	a	e	a		a	c	a	a	a	b	a	b	b	a	b,c,d	a	a	c	g		c	a	a	a	b	c	c	a	d	b	d	5	5	5	5	5
Rozprza	gimnazjum	1	b	a	a	a	a	a	a	a	b	a	a	a	e	c		a	e	a	c	c	e	c	e	f	a	a,b,c	a	a	c	e	a	c	a	a	a	c	c	c	c	d	b	d	5	4	3	4	4
Rozprza	gimnazjum	1	b	a	a	a	a	a	a	a	b	a	a	a	e	c		a	e	a	c	c	e	c	e	f	a	a,b,c	a	a	c	e	a	c	a	a	a	c	c	c	c	d	b	d	5	4	3	4	4
Rozprza	gimnazjum	1	a	c	a	a	a	a	a	a	b	a	a	a	d			a	a	a	b	a	b	b	a	a	b			a	b	d	a	a	a	a	a	a	b	b	c	d	c	d	4	3	3	4	4
Rozprza	gimnazjum	1	a	c	a	a	a	a	a	a	b	a	a	a	d			a	a	a	b	a	b	b	a	a	b			a	b	d	a	a	a	a	a	a	b	b	c	d	c	d	4	3	3	4	4
Rozprza	gimnazjum	1	b	a	a	a	a	a	a	a	b	a	a	a	e	c		a	e	a	c	c	e	c	e	f	a	a,b,c	a	a	c	e	a	c	a	a	a	c	c	c	c	d	b	d	5	4	3	4	4
Rozprza	gimnazjum	1	b	a	a	a	a	a	a	a	b	a	a	a	e	a	0	a	c	a	a	a	b	a	b	b	a	b,c,d	a	a	c	g		c	a	a	a	b	c	c	a	d	b	d	5	5	5	5	5
Rozprza	gimnazjum	1	b	a	a	a	a	a	a	a	b	a	a	a	e	c		a	e	a	c	c	e	c	e	f	a	a,b,c	a	a	c	e	a	c	a	a	a	c	c	c	c	d	b	d	5	4	3	4	4
Rozprza	gimnazjum	1	b	a	a	a	a	a	a	a	b	a	a	a	e	c		a	e	a	c	c	e	c	e	f	a	a,b,c	a	a	c	e	a	c	a	a	a	c	c	c	c	d	b	d	5	4	3	4	4
Rozprza	gimnazjum	1	a	c	a	a	a	a	a	a	b	a	a	a	d			a	a	a	b	a	b	b	a	a	b			a	b	d	a	a	a	a	a	a	b	b	c	d	c	d	4	3	3	4	4
Rozprza	gimnazjum	1	b	a	a	a	a	a	a	a	b	a	a	a	e	c		a	e	a	c	c	e	c	e	f	a	a,b,c	a	a	c	e	a	c	a	a	a	c	c	c	c	d	b	d	5	4	3	4	4
Rozprza	gimnazjum	1	b	a	a	a	a	a	a	a	b	a	a	a	e	a	5	a	c	a	a	a	b	a	b	b	a	b,c,d	a	a	c	g		c	a	a	a	b	c	c	a	d	b	d	5	5	5	5	5
Rozprza	gimnazjum	1	b	a	a	a	a	a	a	a	b	a	a	a	e	c		a	e	a	c	c	e	c	e	f	a	a,b,c	a	a	c	e	a	c	a	a	a	c	c	c	c	d	b	d	5	4	3	4	4
Rozprza	gimnazjum	1	b	a	a	a	a	a	a	a	b	a	a	a	e	c		a	e	a	c	c	e	c	e	f	a	a,b,c	a	a	c	e	a	c	a	a	a	c	c	c	c	d	b	d	5	4	3	4	4
Rozprza	gimnazjum	1	b	a	a	a	a	a	a	a	b	a	a	a	e	c		a	e	a	c	c	e	c	e	f	a	a,b,c	a	a	c	e	a	c	a	a	a	c	c	c	c	d	b	d	5	4	3	4	4
Rozprza	gimnazjum	1	b	a	a	a	a	a	a	a	b	a	a	a	e	a	5	a	c	a	a	a	b	a	b	b	a	b,c,d	a	a	c	g		c	a	a	a	b	c	c	a	d	b	d	5	5	5	5	5
Rozprza	gimnazjum	1	a	c	a	a	a	a	a	a	b	a	a	a	d			a	a	a	b	a	b	b	a	a	b			a	b	d	a	a	a	a	a	a	b	b	c	d	c	d	4	3	3	4	4
Rozprza	gimnazjum	1	a	c	a	a	a	a	a	a	b	a	a	a	d			a	a	a	b	a	b	b	a	a	b			a	b	d	a	a	a	a	a	a	b	b	c	d	c	d	4	3	3	4	4
Rozprza	gimnazjum	1	b	a	a	a	a	a	a	a	b	a	a	a	e	c		a	e	a	c	c	e	c	e	f	a	a,b,c	a	a	c	e	a	c	a	a	a	c	c	c	c	d	b	d	5	4	3	4	4
Rozprza	gimnazjum	1	b	a	a	a	a	a	a	a	b	a	a	a	e	a	5	a	c	a	a	a	b	a	b	b	a	b,c,d	a	a	c	g		c	a	a	a	b	c	c	a	d	b	d	5	5	5	5	5
Rozprza	gimnazjum	1	b	a	a	a	a	a	a	a	b	a	a	a	e	c		a	e	a	c	c	e	c	e	f	a	a,b,c	a	a	c	e	a	c	b	a	a	c	c	c	c	d	b	d	5	4	3	4	4
Rozprza	gimnazjum	1	b	a	a	a	a	a	a	a	b	a	a	a	e	c		a	e	a	c	c	e	c	e	f	a	a,b,c	a	a	c	e	a	c	a	a	a	c	c	c	c	d	b	d	5	4	3	4	4
Rozprza	gimnazjum	1	b	a	a	a	a	a	a	a	a	a	a	a	e	c		a	e	a	a	c	b	a	a	f	c			c	c	e	a	d	a	b	c	c	b	b	a	d	c	a	5	1	2	3	5
Rozprza	gimnazjum	1	b	a	a	a	a	a	a	a	a	a	a	a	e	c		a	e	a	a	c	b	a	a	f	c			c	c	e	a	d	a	b	c	c	b	b	a	d	c	a	5	1	2	3	5
Rozprza	gimnazjum	1	b	a	a	a	a	a	a	a	b	a	a	a	e	b		a	e	a	a	a	b	a	e	a	a	c,d	b	a	c	e	a	a	a	a	a	b	b	b	b	d	c	d	4	2	3	4	5
Rozprza	gimnazjum	1	b	a	a	a	a	a	a	a	b	a	a	a	e	b		a	e	a	a	a	b	a	f	a	a	a	c	c	a	e	b	a	a	a	a	a	b	b	b	d	a	d	5	5	4	3	5
Rozprza	gimnazjum	1	b	a	a	a	a	a	a	a	b	a	a	a	e	c		a	e	a	c	c	e	c	e	f	a	a,b,c	a	a	c	e	a	c	a	a	a	c	c	c	c	d	b	d	5	4	3	4	4
Rozprza	gimnazjum	1	b	a	a	a	a	a	a	a	b	a	a	a	e	a	5	a	c	a	a	a	b	a	b	b	a	b,c,d	a	a	c	g		c	a	a	a	b	c	c	a	d	b	d	5	5	5	5	5
Rozprza	gimnazjum	1	a	c	a	a	a	a	a	a	b	a	a	a	d			a	a	a	b	a	b	b	a	a	b			a	b	d	a	a	a	a	a	a	b	b	c	d	c	d	4	3	3	4	4
Rozprza	gimnazjum	1	a	c	a	a	a	a	a	a	b	a	a	a	d			a	a	a	b	a	b	b	a	a	b			a	b	d	a	a	a	a	a	a	b	b	c	d	c	d	4	3	3	4	4
Rozprza	gimnazjum	1	b	a	a	a	a	a	a	a	b	a	a	a	e	c		a	e	a	c	c	e	c	e	f	a	a,b,c	a	a	c	e	a	c	a	a	a	c	c	c	c	d	b	d	5	4	3	4	4
Rozprza	gimnazjum	1	b	a	a	a	a	a	a	a	b	a	a	a	e	a	5	a	c	a	a	a	b	a	b	b	a	b,c,d	a	a	c	g		c	a	a	a	b	c	c	a	d	b	d	5	5	5	5	5
Rozprza	gimnazjum	1	b	a	a	a	a	a	a	a	b	a	a	a	e	c		a	e	a	c	c	e	c	e	f	a	a,b,c	a	a	c	e	a	c	a	a	a	c	c	c	c	d	b	d	5	4	3	4	4
Rozprza	gimnazjum	1	b	a	a	a	a	a	a	a	b	a	a	a	e	c		a	e	a	c	c	e	c	e	f	a	a,b,c	a	a	c	e	a	c	a	a	a	c	c	c	c	d	b	d	5	4	3	4	4
Rozprza	gimnazjum	1	b	a	a	a	a	a	a	a	b	a	a	a	e	c		a	e	a	c	c	e	c	e	f	a	a,b,c	a	a	c	e	a	c	a	a	a	c	c	c	c	d	b	d	5	4	3	4	4
Rozprza	gimnazjum	1	b	a	a	a	a	a	a	a	b	a	a	a	e	a	5	a	c	a	a	a	b	a	b	b	a	b,c,d	a	a	c	g		c	a	a	a	b	c	c	a	d	b	d	5	5	5	5	5
Rozprza	gimnazjum	1	a	c	a	a	a	a	a	a	b	a	a	a	d			a	a	a	b	a	b	b	a	a	b			a	b	d	a	a	a	a	a	a	b	b	c	d	c	d	4	3	3	4	4
Rozprza	gimnazjum	1	a	c	a	a	a	a	a	a	b	a	a	a	d			a	a	a	b	a	b	b	a	a	b			a	b	d	a	a	a	a	a	a	b	b	c	d	c	d	4	3	3	4	4
Rozprza	gimnazjum	1	b	a	a	a	a	a	a	a	b	a	a	a	e	c		a	e	a	c	c	e	c	e	f	a	a,b,c	a	a	c	e	a	c	a	a	a	c	c	c	c	d	b	d	5	4	3	4	4
Rozprza	gimnazjum	1	b	a	a	a	a	a	a	a	b	a	a	a	e	a	5	a	c	a	a	a	b	a	b	b	a	b,c,d	a	a	c	g		c	a	a	a	b	c	c	a	d	b	d	5	5	5	5	5
Rozprza	gimnazjum	1	b	a	a	a	a	a	a	a	b	a	a	a	e	c		a	e	a	c	c	e	c	e	f	a	a,b,c	a	a	c	e	a	c	a	a	a	c	c	c	c	d	b	d	5	4	3	4	4
Rozprza	gimnazjum	1	b	a	a	a	a	a	a	a	b	a	a	a	e	c		a	e	a	c	c	e	c	e	f	a	a,b,c	a	a	c	e	a	c	a	a	a	c	c	c	c	d	b	d	5	4	3	4	4
Rozprza	gimnazjum	1	b	a	a	a	a	a	a	a	b	a	a	a	e	c		a	e	a	c	c	e	c	e	f	a	a,b,c	a	a	c	e	a	c	a	a	a	c	c	c	c	d	b	d	5	4	3	4	4
Rozprza	gimnazjum	1	b	a	a	a	a	a	a	a	b	a	a	a	e	a	5	a	c	a	a	a	b	a	b	b	a	b,c,d	a	a	c	g		c	a	a	a	b	c	c	a	d	b	d	5	5	5	5	5
Rozprza	gimnazjum	1	a	c	a	a	a	a	a	a	b	a	a	a	d			a	a	a	b	a	b	b	a	a	b			a	b	d	a	a	a	a	a	a	b	b	c	d	c	d	4	3	3	4	4
Rozprza	gimnazjum	1	a	c	a	a	a	a	a	a	b	a	a	a	d			a	a	a	b	a	b	b	a	a	b			a	b	d	a	a	a	a	a	a	b	b	c	d	c	d	4	3	3	4	4
Rozprza	gimnazjum	1	b	a	a	a	a	a	a	a	b	a	a	a	e	c		a	e	a	c	c	e	c	e	f	a	a,b,c	a	a	c	e	a	c	a	a	a	c	c	c	c	d	b	d	5	4	3	4	4
Rozprza	gimnazjum	1	b	a	a	a	a	a	a	a	b	a	a	a	e	a	5	a	c	a	a	a	b	a	b	b	a	b,c,d	a	a	c	g		c	a	a	a	b	c	c	a	d	b	d	5	5	5	5	5
Rozprza	gimnazjum	1	b	a	a	a	a	a	a	a	b	a	a	a	e	c		a	e	a	c	c	e	c	e	f	a	a,b,c	a	a	c	e	a	c	a	a	a	c	c	c	c	d	b	d	5	4	3	4	4
Rozprza	gimnazjum	1	b	a	a	a	a	a	a	a	b	a	a	a	e	c		a	e	a	c	c	e	c	e	f	a	a,b,c	a	a	c	e	a	c	a	a	a	c	c	c	c	d	b	d	5	4	3	4	4
Rozprza	gimnazjum	2	b	a	a	a	a	a	a	a	b	a	a	a	b			a	e	a	a	a	e	a	e	f	c			c	a	b		c	a	a	a	b	b	b	b	d	a	a	3	3	3	3	3
Rozprza	gimnazjum	2	b	a	a	a	a	a	a	a	b	a	a	a	b			a	e	a	a	a	e	a	f	f	c			c	a	b		c	a	a	a	b	b	b	b	d	a	a	3	3	3	3	3
Rozprza	gimnazjum	2	b	a	a	a	a	a	a	a	b	a	a	a	e	a		a	e	a	a	a	e	a	e	f	a	a,b,c,d	a	c	a	e	a	c	a	a	a	d	c	c	b	c	b	a	4	3	2	1	1
Rozprza	gimnazjum	2	b	a	a	a	a	a	a	a	b	a	a	a	a			a	e	c	c	a	b	a	b	a	c			a	c	e	a	c	a	b	a	b	b	b	c	d	b	b	5	4	3	3	4
Rozprza	gimnazjum	2	b	a	a	a	a	a	a	a	b	a	a	a	e	c		a	e	c	c	c	b	a	b	a	c			a	c	e	a	a	a	b	a	b	b	b	c	d	b	c	5	4	3	3	4
Rozprza	gimnazjum	2	a	c	a	a	a	a	a	a	a	a	a	a	e	b		a	b	c	b	a	d	b	a	a	a	a,c	a	a	b	c		a	a	b	a	d	a	b	a	d	b	c	1	5	5	1	3
Rozprza	gimnazjum	2	b	a	a	a	a	a	a	a	a	e	a	a	e	b		a	a	a	c	a	b	b	a	f	a	b,c,d	b	b	a	e	a	a	c	b	a	d	a	a	b	c	d	c	3	3	1	1	3
Rozprza	gimnazjum	2	b	a	a	a	a	a	a	a	b	a	a	a	e	b		a	e	b	b	b	e	b	e	a	c			c	a	e	a	a	a	b	a	b	c	c	c	d	b	d	5	5	3	5	5
Rozprza	gimnazjum	2	b	a	a	a	a	a	a	a	a	b	a	a	e	c		a	b	a	a	a	a,b	c	f	c	a	a,b,c,d	a	a	a	c		a	a	a	a	b	b	b	b	d	a	d	5	5	3	4	5
Rozprza	gimnazjum	2	b	a	a	a	a	a	a	a	b	a	a	a	e	b	10	a	a	c	c	c	b	a	a	a	a	c	c	a	a	e	a	a	a	a	a	a	b	b	a	d	b	d	5	5	4	4	5
Rozprza	gimnazjum	2	b	a	a	a	a	a	a	a	b	a	a	a	e	c		a	e	a	a	a	a	a	d	d	a	c	c	a	a	d	a	b	a	a	a	a	b	b	c	d	a	d	5	5	4	5	5
Rozprza	gimnazjum	2	b	a	a	a	a	a	a	a	b	a	a	a	e	b	18	a	e	a	a	b	d	b	c	a	a	a	a	a	b	e	b	a	a	b	a	b	c	b	c	d	a	d	5	5	3	4	5
Rozprza	gimnazjum	2	a	c	a	a	a	a	a	a	a	a	a	a	e	c		a	e	c	c	c	e	c	e	c	c			a	c	c		b	b	b	b	b	c	c	c	d	b	d	4	4	3	4	4
Rozprza	gimnazjum	2	b	a	a	a	a	a	a	a	b	a	a	a	g			a	e	c	c	c	d	a	e	b	a	c,d	c	a	c	d	a	a	a	b	a	a	c	c	b	d	c	d	5	5	4	5	5
Rozprza	gimnazjum	2	b	a	a	a	a	a	a	a	b	a	a	a	e	c		a	e	a	c	a	b	a	f	a	a	b,c	c	b	c	e	a	c	a	b	a	a	b	b	c	d	a	c	5	3	3	5	5
Rozprza	gimnazjum	2	b	a	a	a	a	a	a	a	b	a	a	a	e	b		a	b	a	a	a	a,b	a	f	a	a	a,b,c,d	c	a	b	d	a	b	a	a	a	b	b	b	b	d	c	c	5	4	3	4	5
Rozprza	gimnazjum	2	b	a	a	a	a	a	a	a	a	e	a	a	e	b		a	a	a	c	a	b	b	a	f	a	b,c,d	b	b	a	e	a	a	c	b	a	d	a	a	b	c	d	c	3	3	1	1	3
Rozprza	gimnazjum	2	b	a	a	a	a	a	a	a	b	a	a	a	e	b		a	e	b	b	b	e	b	e	a	c			c	a	e	a	a	a	b	a	b	c	c	c	d	b	d	5	5	3	5	5
Rozprza	gimnazjum	2	b	a	a	a	a	a	a	a	a	b	a	a	e	c		a	b	a	a	a	a,b	c	f	c	a	a,b,c,d	a	a	a	c		a	a	a	a	b	b	b	b	d	a	d	5	5	3	4	5
Rozprza	gimnazjum	2	b	a	a	a	a	a	a	a	b	a	a	a	e	b	10	a	a	c	c	c	b	a	a	a	a	c	c	a	a	e	a	a	a	a	a	a	b	b	a	d	b	d	5	5	4	4	5
Rozprza	gimnazjum	2	b	a	a	a	a	a	a	a	b	a	a	a	e	c		a	e	a	a	a	a	a	d	d	a	c	c	a	a	d	a	b	a	a	a	a	b	b	c	d	a	d	5	5	4	5	5
Rozprza	gimnazjum	2	b	a	a	a	a	a	a	a	b	a	a	a	e	b	18	a	e	a	a	b	d	b	c	a	a	a	a	a	b	e	b	a	a	b	a	b	c	b	c	d	a	d	5	5	3	4	5
Rozprza	gimnazjum	2	a	c	a	a	a	a	a	a	a	a	a	a	e	c		a	e	c	c	c	e	c	e	c	c			a	c	c		b	b	b	b	b	c	c	c	d	b	d	4	4	3	4	4
Rozprza	gimnazjum	2	b	a	a	a	a	a	a	a	b	a	a	a	g			a	e	c	c	c	d	a	e	b	a	c,d	c	a	c	d	a	a	a	b	a	a	c	c	b	d	c	d	5	5	4	5	5
Rozprza	gimnazjum	2	b	a	a	a	a	a	a	a	b	a	a	a	e	c		a	e	a	c	a	b	a	f	a	a	b,c	c	b	c	e	a	c	a	b	a	a	b	b	c	d	a	c	5	3	3	5	5
Rozprza	gimnazjum	2	b	a	a	a	a	a	a	a	a	b	a	a	e	c		a	b	a	a	a	a,b	c	f	c	a	a,b,c,d	a	a	a	c		a	a	a	a	b	b	b	b	d	a	d	5	5	3	4	5
Rozprza	gimnazjum	2	b	a	a	a	a	a	a	a	b	a	a	a	e	b	10	a	a	c	c	c	b	a	a	a	a	c	c	a	a	e	a	a	a	a	a	a	b	b	a	d	b	d	5	5	4	4	5
Rozprza	gimnazjum	2	b	a	a	a	a	a	a	a	b	a	a	a	e	c		a	e	a	a	a	a	a	d	d	a	c	c	a	a	d	a	b	a	a	a	a	b	b	c	d	a	d	5	5	4	5	5
Rozprza	gimnazjum	2	b	a	a	a	a	a	a	a	b	a	a	a	e	b	18	a	e	a	a	b	d	b	c	a	a	a	a	a	b	e	b	a	a	b	a	b	c	b	c	d	a	d	5	5	3	4	5
Rozprza	gimnazjum	2	a	c	a	a	a	a	a	a	a	a	a	a	e	c		a	e	c	c	c	e	c	e	c	c			a	c	c		b	b	b	b	b	c	c	c	d	b	d	4	4	3	4	4
Rozprza	gimnazjum	2	b	a	a	a	a	a	a	a	b	a	a	a	g			a	e	c	c	c	d	a	e	b	a	c,d	c	a	c	d	a	a	a	b	a	a	c	c	b	d	c	d	5	5	4	5	5
Rozprza	gimnazjum	3	b	a	a	a	a	a	a	a	b	a	a	a	e	c		a	e	a	c	a	b	a	f	a	a	b,c	c	b	c	e	a	c	a	b	a	a	b	b	c	d	a	c	5	3	3	5	5
Rozprza	gimnazjum	3	b	a	a	a	a	a	a	a	b	a	a	a	e	b		a	b	a	a	a	a,b	a	f	a	a	a,b,c,d	c	a	b	d	a	b	a	a	a	b	b	b	b	d	c	c	5	4	3	4	5
Rozprza	gimnazjum	3	b	a	a	a	a	a	a	a	a	e	a	a	e	b		a	a	a	c	a	b	b	a	f	a	b,c,d	b	b	a	e	a	a	c	b	a	d	a	a	b	c	d	c	3	3	1	1	3
Rozprza	gimnazjum	3	b	a	a	a	a	a	a	a	b	a	a	a	e	b		a	e	b	b	b	e	b	e	a	c			c	a	e	a	a	a	b	a	b	c	c	c	d	b	d	5	5	3	5	5
Rozprza	gimnazjum	3	b	a	a	a	a	a	a	a	a	b	a	a	e	c		a	b	a	a	a	a,b	c	f	c	a	a,b,c,d	a	a	a	c		a	a	a	a	b	b	b	b	d	a	d	5	5	3	4	5
Rozprza	gimnazjum	3	b	a	a	a	a	a	a	a	b	a	a	a	e	b	10	a	a	c	c	c	b	a	a	a	a	c	c	a	a	e	a	a	a	a	a	a	b	b	a	d	b	d	5	5	4	4	5
Rozprza	gimnazjum	3	b	a	a	a	a	a	a	a	b	a	a	a	e	c		a	e	a	a	a	a	a	d	d	a	c	c	a	a	d	a	b	a	a	a	a	b	b	c	d	a	d	5	5	4	5	5
Rozprza	gimnazjum	3	b	a	a	a	a	a	a	a	b	a	a	a	e	b	18	a	e	a	a	b	d	b	c	a	a	a	a	a	b	e	b	a	a	b	a	b	c	b	c	d	a	d	5	5	3	4	5
Rozprza	gimnazjum	3	b	a	a	a	a	a	a	a	a	b	a	a	e	c		a	b	a	a	a	a,b	c	f	c	a	a,b,c,d	a	a	a	c		a	a	a	a	b	b	b	b	d	a	d	5	5	3	4	5
Rozprza	gimnazjum	3	b	a	a	a	a	a	a	a	b	a	a	a	e	b	10	a	a	c	c	c	b	a	a	a	a	c	c	a	a	e	a	a	a	a	a	a	b	b	a	d	b	d	5	5	4	4	5
Rozprza	gimnazjum	3	b	a	a	a	a	a	a	a	b	a	a	a	e	c		a	e	a	a	a	a	a	d	d	a	c	c	a	a	d	a	b	a	a	a	a	b	b	c	d	a	d	5	5	4	5	5
Rozprza	gimnazjum	3	b	a	a	a	a	a	a	a	b	a	a	a	e	b	18	a	e	a	a	b	d	b	c	a	a	a	a	a	b	e	b	a	a	b	a	b	c	b	c	d	a	d	5	5	3	4	5
Rozprza	gimnazjum	3	a	c	a	a	a	a	a	a	a	a	a	a	e	c		a	e	c	c	c	e	c	e	c	c			a	c	c		b	b	b	b	b	c	c	c	d	b	d	4	4	3	4	4
Rozprza	gimnazjum	3	b	a	a	a	a	a	a	a	b	a	a	a	g			a	e	c	c	c	d	a	e	b	a	c,d	c	a	c	d	a	a	a	b	a	a	c	c	b	d	c	d	5	5	4	5	5
Rozprza	gimnazjum	3	b	a	a	a	a	a	a	a	b	a	a	a	e	c		a	e	a	c	a	b	a	f	a	a	b,c	c	b	c	e	a	c	a	b	a	a	b	b	c	d	a	c	5	3	3	5	5
Rozprza	gimnazjum	3	b	a	a	a	a	a	a	a	a	a	a	a	e	c		a	b	a	c	a	b	a	f	b	a	a	b	c	a	e	a	b	b	a	a	a	c	b	a	d	b	d	5	5	3	5	5
Rozprza	gimnazjum	3	b	a	a	a	a	a	a	a	b	a	a	a	e	c		a	e	a	a	a	a	a	e	d	a	c	c	a	a	e	a	a	a	a	a	a	c	c	c	d	a	d	5	5	4	5	5
Rozprza	gimnazjum	3	b	a	a	a	a	a	a	a	b	a	a	a	e	c	10	a	b	a	c	a	b	a	e	f	c			a	a	e	a	a	a	a	a	a	c	b	c	d	b	c	5	5	5	5	5
Rozprza	gimnazjum	3	b	a	a	a	a	a	a	a	a	a	a	a	e	c		a	b	a	c	a	b	a	f	b	a	a	b	c	a	e	a	b	b	a	a	a	c	b	a	d	b	d	5	5	3	5	5
Rozprza	gimnazjum	3	b	a	a	a	a	a	a	a	b	a	a	a	e	c		a	e	a	a	a	a	a	e	d	a	c	c	a	a	e	a	a	a	a	a	a	c	c	c	d	a	d	5	5	4	5	5
Rozprza	gimnazjum	3	b	a	a	a	a	a	a	a	b	a	a	a	e	c	10	a	b	a	c	a	b	a	e	f	c			a	a	e	a	a	a	a	a	a	c	b	c	d	b	c	5	5	5	5	5
Rozprza	gimnazjum	3	b	a	a	a	a	a	a	a	a	a	a	a	e	c		a	b	a	c	a	b	a	f	b	a	a	b	c	a	e	a	b	b	a	a	a	c	b	a	d	b	d	5	5	3	5	5
Rozprza	gimnazjum	3	b	a	a	a	a	a	a	a	b	a	a	a	e	c		a	e	a	a	a	a	a	e	d	a	c	c	a	a	e	a	a	a	a	a	a	c	c	c	d	a	d	5	5	4	5	5
Rozprza	gimnazjum	3	b	a	a	a	a	a	a	a	b	a	a	a	e	c		a	e	a	c	c	e	c	e	f	a	a,b,c	a	a	c	e	a	c	a	a	a	c	c	c	c	d	b	d	5	4	3	4	4
Rozprza	gimnazjum	3	b	a	a	a	a	a	a	a	b	a	a	a	e	a	5	a	c	a	a	a	b	a	b	b	a	b,c,d	a	a	c	g		c	a	a	a	b	c	c	a	d	b	d	5	5	5	5	5
Rozprza	gimnazjum	3	a	c	a	a	a	a	a	a	b	a	a	a	d			a	a	a	b	a	b	b	a	a	b			a	b	d	a	a	a	a	a	a	b	b	c	d	c	d	4	3	3	4	4
Rozprza	gimnazjum	3	a	c	a	a	a	a	a	a	b	a	a	a	d			a	a	a	b	a	b	b	a	a	b			a	b	d	a	a	a	a	a	a	b	b	c	d	c	d	4	3	3	4	4
Rozprza	gimnazjum	3	b	a	a	a	a	a	a	a	b	a	a	a	e	c		a	e	a	c	c	e	c	e	f	a	a,b,c	a	a	c	e	a	c	a	a	a	c	c	c	c	d	b	d	5	4	3	4	4
Rozprza	gimnazjum	3	b	a	a	a	a	a	a	a	b	a	a	a	e	a	5	a	c	a	a	a	b	a	b	b	a	b,c,d	a	a	c	g		c	a	a	a	b	c	c	a	d	b	d	5	5	5	5	5
Rozprza	gimnazjum	3	b	a	a	a	a	a	a	a	b	a	a	a	e	c		a	e	a	c	c	e	c	e	f	a	a,b,c	a	a	c	e	a	c	a	a	a	c	c	c	c	d	b	d	5	4	3	4	4
Rozprza	gimnazjum	3	b	a	a	a	a	a	a	a	b	a	a	a	e	c		a	e	a	c	c	e	c	e	f	a	a,b,c	a	a	c	e	a	c	a	a	a	c	c	c	c	d	b	d	5	4	3	4	4
Rozprza	gimnazjum	3	b	a	a	a	a	a	a	a	b	a	a	a	e	c		a	e	a	c	c	e	c	e	f	a	a,b,c	a	a	c	e	a	c	a	a	a	c	c	c	c	d	b	d	5	4	3	4	4
Rozprza	gimnazjum	3	b	a	a	a	a	a	a	a	b	a	a	a	e	a	5	a	c	a	a	a	b	a	b	b	a	b,c,d	a	a	c	g		c	a	a	a	b	c	c	a	d	b	d	5	5	5	5	5
Rozprza	gimnazjum	3	a	c	a	a	a	a	a	a	b	a	a	a	d			a	a	a	b	a	b	b	a	a	b			a	b	d	a	a	a	a	a	a	b	b	c	d	c	d	4	3	3	4	4
Rozprza	gimnazjum	3	a	c	a	a	a	a	a	a	b	a	a	a	d			a	a	a	b	a	b	b	a	a	b			a	b	d	a	a	a	a	a	a	b	b	c	d	c	d	4	3	3	4	4
Rozprza	gimnazjum	3	b	a	a	a	a	a	a	a	b	a	a	a	e	c		a	e	a	c	c	e	c	e	f	a	a,b,c	a	a	c	e	a	c	a	a	a	c	c	c	c	d	b	d	5	4	3	4	4
Rozprza	gimnazjum	3	b	a	a	a	a	a	a	a	b	a	a	a	e	a	5	a	c	a	a	a	b	a	b	b	a	b,c,d	a	a	c	g		c	a	a	a	b	c	c	a	d	b	d	5	5	5	5	5
Rozprza	gimnazjum	3	b	a	a	a	a	a	a	a	b	a	a	a	e	c		a	e	a	c	c	e	c	e	f	a	a,b,c	a	a	c	e	a	c	a	a	a	c	c	c	c	d	b	d	5	4	3	4	4
Rozprza	gimnazjum	3	b	a	a	a	a	a	a	a	b	a	a	a	e	c		a	e	a	c	c	e	c	e	f	a	a,b,c	a	a	c	e	a	c	a	a	a	c	c	c	c	d	b	d	5	4	3	4	4
Rozprza	gimnazjum	2	b	a	a	a	a	a	a	a	b	a	a	a	g			a	e	a	a	a	e	a	e	c	a	c	a	a	c	c		a	a	b	a	a	c	c	c	d	b	d	4	4	5	5	5
Rozprza	gimnazjum	2	b	a	a	a	a	a	a	a	b	a	a	a	e	a		a	e	b	a	a	a	a	e	e	a	a	a	c	b	c		c	a	b	a	a	c	c	c	d	b	a	4	5	4	4	5
Rozprza	gimnazjum	2	b	a	a	a	a	a	a	a	b	a	a	a	e	a		a	a	a	a	a	e	b	e	a	a	a	b	a	a	d	a	a	a	b	a	c	a	a	a	c	b	c	5	5	5	5	5
Rozprza	gimnazjum	2	b	a	a	a	a	a	a	a	b	a	a	a	b			a	e	a	a	a	e	a	e	f	c			c	a	b		a	a	a	a	a	c	b	c	d	b	d	1	1	1	1	1
Rozprza	gimnazjum	2	b	a	a	a	a	a	a	a	b	a	a	a	e	b		a	b	c	c	c	b	b	a	a	a	b,c,d	a	c	a	c		a	a	a	a	b	c	b	b	d	a	d	5	5	3	4	5
Rozprza	gimnazjum	2	b	a	a	a	a	a	a	a	b	a	a	a	e	b		a	b	c	c	c	b	b	a	a	a	b,c,d	a	c	a	c		a	a	a	a	b	c	b	b	d	a	d	5	5	3	4	5
Rozprza	gimnazjum	2	b	a	a	a	a	a	a	a	b	a	a	a	g			a	e	a	a	a	e	a	e	c	a	c	a	a	c	c		a	a	b	a	a	c	c	c	d	b	d	4	4	5	5	5
Rozprza	gimnazjum	2	b	a	a	a	a	a	a	a	b	a	a	a	e	a		a	e	b	a	a	a	a	e	e	a	a	a	c	b	c		c	a	b	a	a	c	c	c	d	b	a	4	5	4	4	5
Rozprza	gimnazjum	2	b	a	a	a	a	a	a	a	b	a	a	a	e	a		a	a	a	a	a	e	b	e	a	a	a	b	a	a	d	a	a	a	b	a	c	a	a	a	c	b	c	5	5	5	5	5
Rozprza	gimnazjum	2	b	a	a	a	a	a	a	a	b	a	a	a	b			a	e	a	a	a	e	a	e	f	c			c	a	b		a	a	a	a	a	c	b	c	d	b	d	1	1	1	1	1
Rozprza	gimnazjum	2	b	a	a	a	a	a	a	a	b	a	a	a	g			a	e	a	a	a	e	a	e	c	a	c	a	a	c	c		a	a	b	a	a	c	c	c	d	b	d	4	4	5	5	5
Rozprza	gimnazjum	2	b	a	a	a	a	a	a	a	b	a	a	a	e	a		a	e	b	a	a	a	a	e	e	a	a	a	c	b	c		c	a	b	a	a	c	c	c	d	b	a	4	5	4	4	5
Rozprza	gimnazjum	2	b	a	a	a	a	a	a	a	b	a	a	a	e	a		a	a	a	a	a	e	b	e	a	a	a	b	a	a	d	a	a	a	b	a	c	a	a	a	c	b	c	5	5	5	5	5
Rozprza	gimnazjum	2	b	a	a	a	a	a	a	a	b	a	a	a	b			a	e	a	a	a	e	a	e	f	c			c	a	b		a	a	a	a	a	c	b	c	d	b	d	1	1	1	1	1
Rozprza	gimnazjum	2	b	a	a	a	a	a	a	a	b	a	a	a	e	c		a	e	c	c	c	e	a	e	a	a	a,b,c,d	a	c	a	c		a	a	a	a	b	c	b	b	a	b	b	4	3	3	4	5
Rozprza	gimnazjum	2	b	a	a	a	a	a	a	a	b	a	a	a	c			a	b	a	a	a	a	a	f	a	a	c,d	a	c	a	a		a	b	b	a	b	c	b	b	d	b	d	5	4	3	5	5
Rozprza	gimnazjum	2	b	a	a	a	a	a	a	a	b	a	a	a	g			a	e	c	c	c	e	a	e	a	a	a,b,c,d	b	c	b	c		a	a	b	b	b	c	b	b	d	b	d	5	4	3	5	5
Rozprza	gimnazjum	2	b	a	a	a	a	a	a	a	b	a	a	a	g			a	e	a	a	a	e	a	e	c	a	c	a	a	c	c		a	a	b	a	a	c	c	c	d	b	d	4	4	5	5	5
Rozprza	gimnazjum	2	b	a	a	a	a	a	a	a	b	a	a	a	e	a		a	e	b	a	a	a	a	e	e	a	a	a	c	b	c		c	a	b	a	a	c	c	c	d	b	a	4	5	4	4	5
Rozprza	gimnazjum	2	b	a	a	a	a	a	a	a	b	a	a	a	e	a		a	a	a	a	a	e	b	e	a	a	a	b	a	a	d	a	a	a	b	a	c	a	a	a	c	b	c	5	5	5	5	5
Rozprza	gimnazjum	2	b	a	a	a	a	a	a	a	b	a	a	a	b			a	e	a	a	a	e	a	e	f	c			c	a	b		a	a	a	a	a	c	b	c	d	b	d	1	1	1	1	1
Rozprza	gimnazjum	2	b	a	a	a	a	a	a	a	b	a	a	a	e	b		a	b	c	c	c	b	b	a	a	a	b,c,d	a	c	a	c		a	a	a	a	b	c	b	b	d	a	d	5	5	3	4	5
Rozprza	gimnazjum	2	b	a	a	a	a	a	a	a	b	a	a	a	e	c		a	e	a	c	c	e	c	e	f	a	a,b,c	a	a	c	e	a	c	a	a	a	c	c	c	c	d	b	d	5	4	3	4	4
Rozprza	gimnazjum	2	b	a	a	a	a	a	a	a	b	a	a	a	e	a	5	a	c	a	a	a	b	a	b	b	a	b,c,d	a	a	c	g		c	a	a	a	b	c	c	a	d	b	d	5	5	5	5	5
Rozprza	gimnazjum	2	a	c	a	a	a	a	a	a	b	a	a	a	d			a	a	a	b	a	b	b	a	a	b			a	b	d	a	a	a	a	a	a	b	b	c	d	c	d	4	3	3	4	4
Rozprza	gimnazjum	2	a	c	a	a	a	a	a	a	b	a	a	a	d			a	a	a	b	a	b	b	a	a	b			a	b	d	a	a	a	a	a	a	b	b	c	d	c	d	4	3	3	4	4
Rozprza	gimnazjum	2	b	a	a	a	a	a	a	a	b	a	a	a	e	c		a	e	a	c	c	e	c	e	f	a	a,b,c	a	a	c	e	a	c	a	a	a	c	c	c	c	d	b	d	5	4	3	4	4
Rozprza	gimnazjum	2	b	a	a	a	a	a	a	a	b	a	a	a	e	a	5	a	c	a	a	a	b	a	b	b	a	b,c,d	a	a	c	g		c	a	a	a	b	c	c	a	d	b	d	5	5	5	5	5
Rozprza	gimnazjum	1	b	a	a	a	a	a	a	a	b	a	a	a	d			a	e	a	a	a	b	a	a	f	a	a,b,c,d	c	a	a	c		a	a	a	a	b	c	c	b	d	b	c	4	5	1	5	5
Rozprza	gimnazjum	1	b	a	a	a	a	a	a	a	b	a	a	a	e	a		a	e	a	a	a	b	a	e	d	a	a,c,d	a	a	a	g		c	a	a	a	b	c	c	b	d	b	d	4	4	4	4	5
Rozprza	gimnazjum	1	b	a	a	a	a	a	a	a	b	a	a	a	e	a		a	e	a	a	a	b	a	e	f	a	a,b,c,d	a	a	a	e	a	a	a	a	a	a	b	b	a	d	b	c	1	1	5	5	5
Rozprza	gimnazjum	1	b	a	a	a	a	a	a	a	b	a	a	a	e	a		a	e	a	a	a	b	a	e	f	a	a,b,c,d	a	a	a	e	a	a	a	a	a	a	b	b	c	d	b	d	5	5	5	5	5
Rozprza	gimnazjum	1	b	a	a	a	a	a	a	a	b	a	a	a	e	a		a	e	a	a	a	b	a	e	e	a	a,b,c,d	a	a	a	e	a	c	a	a	a	a	c	c	c	d	b	d	5	5	4	4	5
Rozprza	gimnazjum	1	b	a	a	a	a	a	a	a	b	a	a	a	e	a		a	e	a	a	a	b	a	e	f	a	a,b,c,d	a	a	a	e	a	a	b	a	a	c	c	c	a	d	b	b	5	2	2	5	5
Rozprza	gimnazjum	1	b	a	a	a	a	a	a	a	b	a	a	a	e	a		a	e	a	a	a	b	a	e	d	a	a,b,c,d	a	a	a	e	a	a	a	a	d	b	b	b	c	d	a	d	5	5	5	5	5
Rozprza	gimnazjum	1	b	a	a	a	a	a	a	a	b	a	a	a	e	b		a	b	c	c	c	e	a	a	b	c			b	a	g		d	b	b	a	b	c	c	c	c	b	c	5	2	3	2	5
Rozprza	gimnazjum	1	a	c	a	a	a	a	a	a	b	a	a	a	e	b		a	a	b	b	b	b	a	a	a	b			c	b	e	a	a	a	a	a	a	b	b	c	d	a	c	5	3	2	4	5
Rozprza	gimnazjum	1	b	a	a	a	a	a	a	a	b	a	a	a	e	a		a	e	a	a	a	b	a	e	e	a	a,b,d	a	a	a	e	a	a	a	a	b	b	b	b	a	d	a	d	5	5	5	5	5
Rozprza	gimnazjum	1	b	a	a	a	a	a	a	a	b	a	a	a	e	a		a	e	a	a	a	b	a	f	e	a	a,b,c,d	a	c	c	e	a	a	a	a	a	c	b	b	b	d	b	d	5	4	3	4	5
Rozprza	gimnazjum	1	a	c	a	a	a	a	a	a	b	a	a	a	d			a	a	a	b	a	b	b	a	a	b			a	b	d	a	a	a	a	a	a	b	b	c	d	c	d	4	3	3	4	4
Rozprza	gimnazjum	1	a	c	a	a	a	a	a	a	b	a	a	a	d			a	a	a	b	a	b	b	a	a	b			a	b	d	a	a	a	a	a	a	b	b	c	d	c	d	4	3	3	4	4
Rozprza	gimnazjum	1	b	a	a	a	a	a	a	a	b	a	a	a	e	c		a	e	a	c	c	e	c	e	f	a	a,b,c	a	a	c	e	a	c	a	a	a	c	c	c	c	d	b	d	5	4	3	4	4
Rozprza	gimnazjum	1	b	a	a	a	a	a	a	a	b	a	a	a	e	a	5	a	c	a	a	a	b	a	b	b	a	b,c,d	a	a	c	g		c	a	a	a	b	c	c	a	d	b	d	5	5	5	5	5
Rozprza	gimnazjum	1	b	a	a	a	a	a	a	a	b	a	a	a	d			a	e	a	a	a	b	a	a	f	a	a,b,c,d	c	a	a	c		a	a	a	a	b	c	c	b	d	b	c	4	5	1	5	5
Rozprza	gimnazjum	1	b	a	a	a	a	a	a	a	b	a	a	a	e	a		a	e	a	a	a	b	a	e	d	a	a,c,d	a	a	a	g		c	a	a	a	b	c	c	b	d	b	d	4	4	4	4	5
Rozprza	gimnazjum	1	b	a	a	a	a	a	a	a	b	a	a	a	e	a		a	e	a	a	a	b	a	e	f	a	a,b,c,d	a	a	a	e	a	a	a	a	a	a	b	b	a	d	b	c	1	1	5	5	5
Rozprza	gimnazjum	1	b	a	a	a	a	a	a	a	b	a	a	a	e	a		a	e	a	a	a	b	a	e	f	a	a,b,c,d	a	a	a	e	a	a	a	a	a	a	b	b	c	d	b	d	5	5	5	5	5
Rozprza	gimnazjum	1	b	a	a	a	a	a	a	a	b	a	a	a	e	a		a	e	a	a	a	b	a	e	e	a	a,b,c,d	a	a	a	e	a	c	a	a	a	a	c	c	c	d	b	d	5	5	4	4	5
Rozprza	gimnazjum	1	b	a	a	a	a	a	a	a	b	a	a	a	e	a		a	e	a	a	a	b	a	e	f	a	a,b,c,d	a	a	a	e	a	a	b	a	a	c	c	c	a	d	b	b	5	2	2	5	5
Rozprza	gimnazjum	1	b	a	a	a	a	a	a	a	b	a	a	a	e	a		a	e	a	a	a	b	a	e	d	a	a,b,c,d	a	a	a	e	a	a	a	a	d	b	b	b	c	d	a	d	5	5	5	5	5
Rozprza	gimnazjum	1	b	a	a	a	a	a	a	a	b	a	a	a	e	b		a	b	c	c	c	e	a	a	b	c			b	a	g		d	b	b	a	b	c	c	c	c	b	c	5	2	3	2	5
Rozprza	gimnazjum	1	a	c	a	a	a	a	a	a	b	a	a	a	e	b		a	a	b	b	b	b	a	a	a	b			c	b	e	a	a	a	a	a	a	b	b	c	d	a	c	5	3	2	4	5
Rozprza	gimnazjum	1	b	a	a	a	a	a	a	a	b	a	a	a	e	a		a	e	a	a	a	b	a	e	e	a	a,b,d	a	a	a	e	a	a	a	a	b	b	b	b	a	d	a	d	5	5	5	5	5
Rozprza	gimnazjum	3	a	c	a	a	a	a	a	a	a	a	a	a	e	b	3	a	e	b	b	b	b	a	c	d	a	b,c,d	a	b	b	e	a	a	a	b	a	c	b	b	b	d	a	d	5	4	4	4	5
Rozprza	gimnazjum	3	a	d	a	a	a	a	a	a	a	b	a	a	c			a	d	c	c	c	e	c	f	a	c			c	c	c		c	a	b	a	c	c	c	b	c	a	d	5	4	3	4	4
Rozprza	gimnazjum	3	a	d	a	a	a	a	a	a	b	a	a	a	e	b	20	a	c	a	c	a	b	c	b	a	a	a,c	b	a	a	c		a	a	a	b	c	c	b	b	d	b	d	4	4	4	4	4
Rozprza	gimnazjum	3	a	d	a	a	a	a	a	a	a	b	a	a	c			a	d	c	c	c	e	c	f	a	c			c	c	c		c	a	b	a	c	c	c	b	c	a	d	5	4	3	4	4
Rozprza	gimnazjum	3	a	d	a	a	a	a	a	a	b	a	a	a	e	b	20	a	c	a	c	a	b	c	b	a	a	a,c	b	a	a	c		a	a	a	b	c	c	b	b	d	b	d	4	4	4	4	4
Rozprza	gimnazjum	3	b	a	a	a	a	a	a	a	a	b	a	a	e	b		a	a	a	c	a	e	c	f	b	a	a,b,c,d	a	a	c	d	a	b	d	b	d	d	c	c	c	c	c	c	3	4	2	3	5
Rozprza	gimnazjum	3	a	d	a	a	a	a	a	a	b	a	a	a	g			a	e	a	a	a	b	a	f	e	a	b,c,d	c	a	c	f		a	a	b	a	c	c	b	c	d	b	c	4	4	3	3	5
Rozprza	gimnazjum	3	a	d	a	a	a	a	a	a	a	a	a	a	e	c	3	a	e	a	a	c	d	a	f	e	a	a,b,c,d	a	c	a	c		a	a	b	b	b	c	b	c	a	b	a	4	3	3	3	3
Rozprza	gimnazjum	3	a	d	a	a	a	a	a	a	a	a	a	a	e	a	3	a	e	a	a	a	e	a	f	f	a	b,c	c	c	a	e	a	a	a	a	a	a	c	b	a	d	b	d	3	3	3	3	3
Rozprza	gimnazjum	3	a	b	a	a	a	a	a	a	a	a	a	a	g			a	a	c	c	c	e	a	e	f	c			c	c	d	c	b	d	a	a	a	b	b	c	d	b	d	3	3	3	3	3
Rozprza	gimnazjum	3	a	b	a	a	a	a	a	a	b	a	a	a	g			a	a	a	c	c	e	c	e	e	c			b	b	g		a	a	a	a	a	b	b	c	d	a	c	3	2	4	2	5
Rozprza	gimnazjum	3	a	d	a	a	a	a	a	a	a	a	a	a	e	c	3	a	e	a	a	c	d	a	f	e	a	a,b,c,d	a	c	a	c		a	a	b	b	b	c	b	c	a	b	a	4	3	3	3	3
Rozprza	gimnazjum	3	a	d	a	a	a	a	a	a	a	a	a	a	e	a	3	a	e	a	a	a	e	a	f	f	a	b	c	a	a	e	a	a	a	a	a	a	c	b	a	d	b	d	3	3	3	3	3
Rozprza	gimnazjum	3	a	b	a	a	a	a	a	a	a	a	a	a	g			a	a	c	c	c	e	a	e	f	c			c	c	d	c	b	d	a	a	a	b	b	c	d	b	d	3	3	3	3	3
Rozprza	gimnazjum	3	a	b	a	a	a	a	a	a	b	a	a	a	g			a	a	a	c	c	e	c	e	e	c			b	b	g		a	a	a	a	a	b	b	c	d	a	c	3	2	4	2	5
Rozprza	gimnazjum	3	a	d	a	a	a	a	a	a	a	a	a	a	e	c	3	a	e	a	a	c	d	a	f	e	a	a,b,c,d	a	c	a	c		a	a	b	b	b	c	b	c	a	b	a	4	3	3	3	3
Rozprza	gimnazjum	3	a	d	a	a	a	a	a	a	a	a	a	a	e	a	3	a	e	a	a	a	e	a	f	f	a	b,c	c	c	a	e	a	a	a	a	a	a	c	b	a	d	b	d	3	3	3	3	3
Rozprza	gimnazjum	3	a	b	a	a	a	a	a	a	a	a	a	a	g			a	a	c	c	c	e	a	e	f	c			c	c	d	c	b	d	a	a	a	b	b	c	d	b	d	3	3	3	3	3
Rozprza	gimnazjum	3	a	b	a	a	a	a	a	a	b	a	a	a	g			a	a	a	c	c	e	c	e	e	c			b	b	g		a	a	a	a	a	b	b	c	d	a	c	3	2	4	2	5
Rozprza	gimnazjum	3	a	d	a	a	a	a	a	a	a	a	a	a	e	c	3	a	e	a	a	c	d	a	f	e	a	a,b,c,d	a	c	a	c		a	a	b	b	b	c	b	c	a	b	a	4	3	3	3	3
Rozprza	gimnazjum	3	a	c	a	a	a	a	a	a	a	a	a	a	e	b	5	a	e	b	b	b	b	a	c	d	a	b,c,d	a	b	b	e	a	a	a	b	a	c	b	b	b	d	a	d	5	4	4	4	5
Rozprza	gimnazjum	3	a	d	a	a	a	a	a	a	b	a	a	a	c			a	e	c	c	a	e	c	a	a	c			c	c	g		a	a	a	a	b	c	c	c	d	d	c	4	3	3	4	5
Rozprza	gimnazjum	3	a	d	a	a	a	a	a	a	b	a	a	a	e	a		a	e	a	a	a	e	b	f	b	a	b,c,d	a	c	a	e	a	c	a	a	a	b	c	c	c	d	a	d	5	5	4	5	5
Rozprza	gimnazjum	3	b	a	a	a	a	a	a	a	a	b	g	g4	e	b		a	a	a	c	a	e	c	f	b	a	a,b,c,d	a	a	c	d	a	b	d	b	d	d	c	c	c	c	c	c	3	4	2	3	5
Rozprza	gimnazjum	3	b	a	a	a	a	a	a	a	a	b	a	a	e	b		a	a	a	c	a	e	c	f	b	a	a,b,c,d	a	a	c	d	a	b	d	b	d	d	c	c	c	c	c	c	3	4	2	3	5
Rozprza	gimnazjum	3	a	d	a	a	a	a	a	a	b	a	a	a	g			a	e	a	a	a	b	a	f	e	a	b,c,d	c	a	c	f		a	a	b	a	c	c	b	c	d	b	c	4	4	3	3	5
Rozprza	gimnazjum	3	a	d	a	a	a	a	a	a	a	b	a	a	c			a	d	c	c	c	e	c	f	a	c			c	c	c		c	a	b	a	c	c	c	b	c	a	d	5	4	3	4	4
Rozprza	gimnazjum	3	a	d	a	a	a	a	a	a	b	a	a	a	e	b	20	a	c	a	c	a	b	c	b	a	a	a,c	b	a	a	c		a	a	a	b	c	c	b	b	d	b	d	4	4	4	4	4
Rozprza	gimnazjum	3	a	d	a	a	a	a	a	a	b	a	a	a	g			a	e	a	a	a	b	a	f	e	a	b,c,d	c	a	c	f		a	a	b	a	c	c	b	c	d	b	c	4	4	3	3	5
Rozprza	gimnazjum	3	b	a	a	a	a	a	a	a	b	a	a	a	e	c		a	e	a	c	c	e	c	e	f	a	a,b,c	a	a	c	e	a	c	a	a	a	c	c	c	c	d	b	d	5	4	3	4	4
Rozprza	gimnazjum	3	a	c	a	a	a	a	a	a	b	a	a	a	e	b		a	c	c	c	c	e	b	a	a	a	d,e1	a	c	c	e	b	b	c	a	d	b	c	b	b	d	c	c	4	4	4	5	5
Rozprza	gimnazjum	3	a	c	e	d	b	e	e	e	b	a	b	f	e	b		b	c	c	c	c	e	b	a	a	a	d,e1	a	c	c	e	b	b	c	a	d	b	c	b	b	d	c	c	4	4	4	5	5
Rozprza	gimnazjum	3	a	c	a	a	a	a	a	a	a	a	a	a	e	b		a	a	c	c	c	b	b	a	a	a	c,d	b	a	a	d	a	a	a	b	a	d	c	c	c	c	b	a	4	1	1	1	5
Rozprza	gimnazjum	3	a	d	a	a	a	a	a	a	a	a	a	a	e	b	18	a	d	a	a	c	b	c	f	a	a	a,c,d	c	c	a	d	a	a	a	a	a	c	c	c	b	d	b	c	5	4	3	4	5
Rozprza	gimnazjum	3	a	c	e	b	c	b	e	c	a	a	c	d	e	b		b	a	c	c	c	b	b	a	a	a	c,d	b	a	a	d	a	a	c	b	d	d	c	c	c	c	b	a	4	1	1	1	5
Rozprza	gimnazjum	3	a	d	a	a	a	a	a	a	a	a	a	a	e	b	18	a	d	a	a	c	b	c	f	a	a	a,c,d	c	c	a	d	a	a	a	a	a	c	c	c	b	d	b	c	5	4	3	4	5
Rozprza	gimnazjum	3	a	d	a	a	a	a	a	a	b	a	a	a	c			a	d	c	c	c	b	a	b	a	c			a	c	e	a	d	a	b	a	b	b	b	c	d	b	d	5	5	3	3	5
Rozprza	gimnazjum	3	a	d	a	a	a	a	a	a	b	a	a	a	c			a	d	c	c	c	b	a	b	a	c			a	c	e	a	d	a	b	a	b	b	b	c	d	b	d	5	5	3	3	5
Rozprza	gimnazjum	3	a	d	a	a	a	a	a	a	b	a	a	a	c			a	d	c	c	c	b	a	b	a	c			a	c	e	a	d	a	b	a	b	b	b	c	d	b	d	5	5	3	3	5
Rozprza	gimnazjum	3	a	c	a	a	a	a	a	a	a	a	a	a	e	b		a	a	c	c	c	b	b	a	a	a	c,d	b	a	a	d	a	a	a	b	a	d	c	c	c	c	b	a	4	1	1	1	5
Rozprza	gimnazjum	3	a	d	a	a	a	a	a	a	a	a	a	a	e	b	18	a	d	a	a	c	b	c	f	a	a	a,c,d	c	c	a	d	a	a	a	a	a	c	c	c	b	d	b	c	5	4	3	4	5
Rozprza	gimnazjum	3	a	d	a	a	a	a	a	a	b	a	a	a	g			a	e	a	a	a	e	a	a	b	a	a,b,c	a	c	a	d	b	a	a	a	a	b	b	b	b	d	b	d	4	4	3	4	4
Rozprza	gimnazjum	3	a	d	a	a	a	a	a	a	b	a	a	a	g			a	e	a	a	a	e	a	a	b	a	a,b,c	a	c	a	d	b	a	a	a	a	b	b	b	b	d	b	d	4	4	3	4	4
Rozprza	gimnazjum	3	a	d	a	a	a	a	a	a	b	a	a	a	g			a	e	a	a	a	e	a	a	b	a	a,b,c	a	c	a	d	b	a	a	a	a	b	b	b	b	d	b	d	4	4	3	4	4
Rozprza	gimnazjum	3	a	d	a	a	a	a	a	a	b	a	a	a	g			a	e	a	a	a	e	a	a	b	a	a,b,c	a	c	a	d	b	a	a	a	a	b	b	b	b	d	b	d	4	4	3	4	4
Rozprza	gimnazjum	2	a	d	a	a	a	a	a	a	b	a	a	a	g			a	a	c	c	c	e	c	f	f	c			c	a	c		c	a	b	b	b	c	b	b	d	b	c	4	4	3	3	5
Rozprza	gimnazjum	2	a	d	f	e	b	b	e	e	a	a	g1	f	e	a	10	b		a	a	a	b	a	f	d	a	a,b,c,d	a	c	c	e	a	b	d	a	d	d	a	b	a	b	c	b	3	3	1	4	5
Rozprza	gimnazjum	2	a	c	e	d	b	h13	e	e	a	f	f	d	d			b		c	c	c	d	a	c	a	a	a,b	c	a	b	g		d	c	a	d	b	b	b	b	d	c	d	5	4	3	2	5
Rozprza	gimnazjum	2	a	c	a	a	a	a	a	a	b	a	a	a	e	c		a	d	c	a	a	b	c	f	f	c			a	c	g		b	b	a	c	c	c	c	c	d	b	c	1	1	1	1	1
Rozprza	gimnazjum	2	a	c	e	d	d	h13	e	e	a	g	b	e	g			b		c	c	c	e	c	e	f	c			c	c	g		e	c	a	c	c	c	b	c	c	c	a	3	3	2	3	4
Rozprza	gimnazjum	2	a	d	a	a	a	a	a	a	a	b	a	a	e	b		a	e	b	b	c	e	c	f	f	a	a,b	a	c	c	g		a	a	b	a	a	b	b	b	d	c	c	5	3	3	4	5
Rozprza	gimnazjum	2	a	d	f	e	c	e	e	d	a	b	e	f	g			b		c	c	c	e	a	f	f	c			c	c	g		a	c	a	c	c	b	c	b	c	b	c	3	3	4	4	3
Rozprza	gimnazjum	2	a	d	a	a	a	a	a	a	b	a	a	a	g			a	a	c	c	c	e	c	f	f	c			c	a	c		c	a	b	b	b	c	b	b	d	b	c	4	4	3	3	5
Rozprza	gimnazjum	2	a	d	f	e	b	b	e	e	a	a	g1	f	e	a	10	b		a	a	a	b	a	f	d	a	a,b,c,d	a	c	c	e	a	b	d	a	d	d	a	b	a	b	c	b	3	3	1	4	5
Rozprza	gimnazjum	2	a	c	e	d	b	h13	e	e	a	f	f	d	d			b		c	c	c	d	a	c	a	a	a,b	c	a	b	g		d	c	a	d	b	b	b	b	d	c	d	5	4	3	2	5
Rozprza	gimnazjum	2	a	c	b	b	d	c	b	e	b	a	d	f	e	c		b	d	c	a	a	b	c	f	f	c			a	c	g		b	b	a	c	c	c	c	c	d	b	c	1	1	1	1	1
Rozprza	gimnazjum	2	a	d	e	d	d	h13	e	e	a	g	b	e	g			b		c	c	c	e	c	e	f	c			c	c	g		e	c	a	c	c	c	b	c	c	c	a	3	3	2	3	4
Rozprza	gimnazjum	2	a	d	a	a	a	a	a	a	a	b	a	a	e	b		a	e	b	b	c	e	c	f	f	a	a,b	a	c	c	g		a	a	b	a	a	b	b	b	c	c	c	5	3	3	5	5
Rozprza	gimnazjum	2	a	d	f	e	c	e	e	d	a	b	e	f	g			b		c	c	c	e	a	f	f	c			c	c	g		a	c	a	c	c	b	c	b	c	b	c	3	3	4	4	3
Rozprza	gimnazjum	2	a	d	f	e	b	g	e	e	a	e	f	g3	e	b		b		c	c	c	b	c	b	c	a	b	b	c	c	g		a	c	a	d	d	c	c	c	c	c	c	4	4	3	4	4
Rozprza	gimnazjum	2	a	d	b	b	b	c	b	e	a	a	c	d	d			b	b	c	c	c	c	c	f	f	c			c	c	c		c	c	a	c	c	c	c	c	c	c	d	5	5	3	4	5
Rozprza	gimnazjum	2	a	e	a	a	a	a	a	a	a	f	a	a	e	b		a	b	a	a	a	e	a	a	f	c			a	a	g		a	a	a	b	b	b	b	b	d	b	d	5	5	3	5	5
Rozprza	gimnazjum	2	a	c	a	a	a	a	a	a	a	d	a	a	e	c		a	a	c	c	a	b	b	b	a	c			c	b	g		b	c	a	c	c	c	c	c	d	c	c	4	2	2	4	4
Rozprza	gimnazjum	2	a	e	a	a	a	a	a	a	a	d	a	a	e	b		a	d	a	a	a	b	b	f	a	a	a	c	b	b	g		a	a	a	a	a	b	b	b	c	b	c	5	5	5	5	5
Rozprza	gimnazjum	2	a	c	a	a	a	a	a	a	a	a	a	a	d			a	b	a	c	c	d	a	a	a	c			a	b	g		a	a	a	a	c	c	c	c	d	c	c	4	4	3	2	4
Rozprza	gimnazjum	2	a	d	c	b	b	b	e	e	a	g	g1	d	b			b		c	c	c	e	b	a	a	b			b	b	g		a	d	a	d	d	c	c	c	a	d	a	1	1	1	1	1
Rozprza	gimnazjum	2	a	d	f	e	g	b	e	c	a	d	b	f	e	c		b		c	c	c	b	c	b	f	a	a,b	b	c	c	g		b	d	a	d	d	c	c	c	d	c	c	4	4	3	4	4
Rozprza	gimnazjum	2	a	c	e	d	d	b	e	e	a	d	c	f	g			b		c	c	c	e	c	f	f	c			c	c	g		e	b	a	c	b	c	b	b	c	c	c	1	2	2	5	4
Rozprza	gimnazjum	2	a	e	a	a	a	a	a	a	a	a	a	a	e	b	4	a	c	c	a	c	b	b	f	a	a	a	c	c	b	f		a	a	a	a	c	c	b	c	d	b	c	5	4	4	4	5
Rozprza	gimnazjum	2	a	e	a	a	a	a	a	a	a	b	a	a	e	b	7	a	d	c	a	a	e	c	f	a	c			c	c	g		a	a	a	a	b	c	c	c	d	b	c	5	4	3	5	5
Rozprza	gimnazjum	2	a	e	a	a	a	a	a	a	a	b	a	a	g			a	e	c	c	c	e	a	f	c	a	d	c	b	c	g		a	a	b	c	c	b	b	a	d	c	c	1	2	3	3	4
Rozprza	gimnazjum	2	a	c	a	a	a	a	a	a	b	a	a	a	e	b		a	e	a	a	c	e	b	a	a	c			a	a	g		a	a	a	a	b	c	b	c	d	b	d	5	4	3	4	5
Rozprza	gimnazjum	2	a	e	a	a	a	a	a	a	a	a	a	a	c			a	d	a	c	a	b	a	e	c	a	a	a	a	a	c		a	a	a	a	a	b	b	b	d	b	c	5	4	3	4	5
Rozprza	gimnazjum	2	a	d	a	a	a	a	a	a	a	g	a	a	e	b		a	b	c	c	c	b	b	a	a	c			c	a	e	b	d	a	a	c	c	c	b	c	d	b	c	4	3	3	4	4
Rozprza	gimnazjum	2	a	d	a	a	a	a	a	a	b	a	a	a	e	a	5	a	e	a	a	a	a,b	a	e	e	a	a,b,c,d	a	a	a	e	a	c	a	a	a	a	b	b	a	d	a	d	5	5	5	5	5
Rozprza	gimnazjum	2	a	d	a	a	a	a	a	a	b	a	a	a	e	b		a	b	a	a	a	b	b	a	a	a	a	c	c	b	g		b	a	b	a	a	b	b	b	d	a	c	5	4	3	5	5
Rozprza	gimnazjum	2	a	d	a	a	a	a	a	a	b	a	a	a	e	b		a	b	a	a	a	b	b	a	a	a	a	c	c	b	g		d	a	a	a	b	b	b	b	d	a	d	5	4	3	4	5
Rozprza	gimnazjum	2	a	e	b	b	b	c	e	d	a	f	f	f	e	b		a	a	c	a	a	b	a	a	a	b			c	a	e	a	b	c	a	c	c	b	c	c	c	b	b	4	4	3	3	2
Rozprza	gimnazjum	2	a	d	a	a	a	a	a	a	b	a	a	a	f			a	e	a	a	a	a	a	a	a	a	a,b,c,d	a	a	c	f		b	b	b	c	c	b	a	c	d	d	d	1	1	1	1	1
Rozprza	gimnazjum	2	a	e	a	a	a	a	a	a	a	g	a	a	a			a	a	a	a	a	a	a	a	a	a	a	a	a	a	c		b	a	a	b	b	b	b	b	d	c	b	5	5	5	5	5
Rozprza	gimnazjum	2	a	d	a	a	a	a	a	a	b	a	a	a	e	b		a	b	a	a	a	b	b	a	a	a	a	c	c	b	g		b	a	b	a	a	b	b	b	d	a	c	5	4	3	5	5
Rozprza	gimnazjum	2	a	d	a	a	a	a	a	a	b	a	a	a	e	b		a	b	a	a	a	b	b	a	a	a	a	c	c	b	g		d	a	a	a	b	b	b	b	d	a	d	5	4	3	4	5
Rozprza	gimnazjum	2	a	e	b	b	b	c	e	d	a	f	f	f	e	b		a	a	c	a	a	b	a	a	a	b			c	a	e	a	b	c	a	c	c	b	c	c	c	b	b	4	4	3	3	2
Rozprza	gimnazjum	2	a	c	a	a	a	a	a	a	b	a	a	a	b			a	a	b	b	a	b	b	a	a	b			b	c	b		a	a	a	a	b	b	b	b	d	b	d	5	5	3	5	5
Rozprza	gimnazjum	2	a	e	a	a	a	a	a	a	a	a	a	a	e	b		a	a	a	a	a	b	c	f	a	c			c	c	g		b	a	b	a	a	c	b	c	d	a	d	5	4	3	4	5
Rozprza	gimnazjum	2	a	c	a	a	a	a	a	a	a	b	a	a	b			a	e	a	a	a	a	a	a	a	a	a	a	a	a	d	c	c	a	b	a	c	b	b	b	b	b	a	5	4	3	5	5
Rozprza	gimnazjum	2	a	c	b	b	b	g	e	e	b	a	e	d	a			a	b	a	a	b	c	a	c	a	b			a	c	e	c	a	d	b	b	c	b	a	c	c	b	a	1	1	1	1	1
Rozprza	gimnazjum	2	a	e	a	a	a	a	a	a	a	a	a	a	g			a	e	a	a	a	a	a	f	a	a	b	a	a	c	g		b	b	a	b	c	b	b	c	d	a	c	5	5	4	5	5
Rozprza	gimnazjum	2	a	e	a	a	a	a	a	a	a	a	a	a	e	b	4	a	c	c	a	c	b	b	f	a	a	a	c	c	b	f		a	a	a	a	c	c	b	c	d	b	c	5	4	4	4	5
Rozprza	gimnazjum	2	a	e	a	a	a	a	a	a	a	b	a	a	e	b	7	a	d	c	a	a	e	c	f	a	c			c	c	g		a	a	a	a	b	c	c	c	d	b	c	5	4	3	5	5
Rozprza	gimnazjum	2	a	d	a	a	a	a	a	a	b	a	a	a	e	c	3	a	d	c	c	c	a	c	f	f	c			c	c	g		a	a	a	a	b	b	b	c	c	b	d	5	5	3	5	5
Rozprza	gimnazjum	1	a	d	a	a	a	a	a	a	b	a	a	a	e	a	5	a	e	a	a	a	a,b	a	e	e	a	a,b,c,d	a	a	a	e	a	c	a	a	a	a	b	b	a	d	a	d	5	5	5	5	5
Rozprza	gimnazjum	1	a	e	a	a	a	a	a	a	a	f	a	a	e	b		a	a	c	a	a	b	a	a	a	b			c	a	e	a	b	c	a	c	c	b	c	c	c	b	b	4	4	3	3	2
Rozprza	gimnazjum	1	a	e	b	b	b	c	e	d	a	f	f	f	e	b		a	a	c	a	a	b	a	a	a	b			c	a	e	a	b	c	a	c	c	b	c	c	c	b	b	4	4	3	3	2
Rozprza	gimnazjum	1	a	c	b	b	b	g	e	e	b	a	e	d	a			a	b	a	a	b	c	a	c	a	b			a	c	e	c	a	d	b	b	c	b	a	c	c	b	a	1	1	1	1	1
Rozprza	gimnazjum	1	a	e	a	a	a	a	a	a	a	a	a	a	g			a	e	a	a	a	a	a	f	a	a	b	a	a	c	g		b	b	a	b	c	b	b	c	d	a	c	5	5	4	5	5
Rozprza	gimnazjum	1	a	e	a	a	a	a	a	a	a	a	a	a	e	b	4	a	c	c	a	c	b	b	f	a	a	a	c	c	b	f		a	b	a	c	c	c	b	c	d	b	c	5	4	4	4	5
Rozprza	gimnazjum	1	a	e	a	a	a	a	a	a	a	b	a	a	e	b	7	a	d	c	a	a	e	c	f	a	c			c	c	g		a	a	a	a	b	c	c	c	d	b	c	5	4	3	5	5
Rozprza	gimnazjum	1	a	d	a	a	a	a	a	a	b	a	a	a	e	a	5	a	e	a	a	a	a,b	a	e	e	a	a,b,c,d	a	a	a	e	a	c	a	a	a	a	b	b	a	d	a	d	5	5	5	5	5
Rozprza	gimnazjum	1	a	e	a	a	a	a	a	a	a	f	a	a	e	b		a	a	c	a	a	b	a	a	a	b			c	a	e	a	b	c	a	c	c	b	c	c	c	b	b	4	4	3	3	2
Rozprza	gimnazjum	1	a	e	b	b	b	c	e	d	a	f	f	f	e	b		a	a	c	a	a	b	a	a	a	b			c	a	e	a	b	c	a	c	c	b	c	c	c	b	b	4	4	3	3	2
Rozprza	gimnazjum	1	a	c	a	a	a	a	a	a	b	a	a	a	a			a	b	a	a	b	c	a	c	a	b			a	c	e	c	a	d	b	b	c	b	a	c	c	b	a	1	1	1	1	1
Rozprza	gimnazjum	1	a	e	a	a	a	a	a	a	a	a	a	a	g			a	e	a	a	a	a	a	f	a	a	b	a	a	c	g		b	b	a	b	c	b	b	c	d	a	c	5	5	4	5	5
Rozprza	gimnazjum	1	a	e	a	a	a	a	a	a	a	a	a	a	e	b	4	a	c	c	a	c	b	b	f	a	a	a	c	c	b	f		a	b	a	c	c	c	b	c	d	b	c	5	4	4	4	5
Rozprza	gimnazjum	1	a	e	a	a	a	a	a	a	a	b	a	a	e	b	7	a	d	c	a	a	e	c	f	a	c			c	c	g		a	a	a	a	b	c	c	c	d	b	c	5	4	3	5	5
Rozprza	gimnazjum	1	a	c	e	d	b	h13	e	e	a	f	f	d	d			b		c	c	c	d	a	c	a	a	a,b	c	a	b	g		d	c	a	d	b	b	b	b	d	c	d	5	4	3	2	5
Rozprza	gimnazjum	1	a	c	a	a	a	a	a	a	b	a	a	a	e	c		a	d	c	a	a	b	c	f	f	c			a	c	g		b	b	a	c	c	c	c	c	d	b	c	1	1	1	1	1
Rozprza	gimnazjum	1	a	c	e	d	d	h13	e	e	a	g	b	e	g			b		c	c	c	e	c	e	f	c			c	c	g		e	c	a	c	c	c	b	c	c	c	a	3	3	2	3	4
Rozprza	gimnazjum	1	a	d	a	a	a	a	a	a	a	b	a	a	e	b		a	e	b	b	c	e	c	f	f	a	a,b	a	c	c	g		a	a	b	a	a	b	b	b	d	c	c	5	3	3	4	5
Rozprza	gimnazjum	1	a	c	f	e	c	e	e	d	a	b	e	f	g			b		c	c	c	e	a	f	f	c			c	c	g		c	c	a	c	c	b	c	b	c	b	c	3	3	4	4	3
Rozprza	gimnazjum	1	a	c	f	e	b	b	e	e	a	f	c	d	g			c		c	c	c	b	b	a	a	c			b	c	g		d	d	b	d	d	c	c	b	c	c	c	4	4	4	4	4
Rozprza	gimnazjum	1	a	e	a	a	a	a	a	a	b	a	a	a	c			a	b	a	c	a	b	a	b	b	a	b	b	b	b	a		a	a	b	b	d	b	a	a	a	a	a	1	2	3	4	5
Rozprza	gimnazjum	1	a	e	a	a	a	a	a	a	a	a	a	a	d			a	e	b	a	a	e	c	f	f	a	a	b	b	a	g		c	a	b	c	c	b	b	a	d	a	d	5	5	5	5	5
Rozprza	gimnazjum	1	a	e	a	a	a	a	a	a	b	a	a	a	e	a		a	a	a	a	a	a	a	b	a	a	b	a	a	a	e	a	a	a	a	a	c	c	b	b	d	c	d	5	4	5	5	5
Rozprza	gimnazjum	1	a	e	a	a	a	a	a	a	b	a	a	a	e	b		a	a	a	a	a	b	a	b	a	a	a	c	a	a	e	a	a	a	a	a	a	c	b	c	d	b	d	5	5	4	5	5
Rozprza	gimnazjum	1	a	e	a	a	a	a	a	a	a	b	a	a	g			a	e	c	c	c	e	a	f	c	a	d	c	b	c	g		a	a	b	c	c	b	b	a	d	c	c	1	2	3	3	4
Rozprza	gimnazjum	1	a	d	g	d	g	h4	c	e	a	b	c	d	d			b		a	a	a	a	a	f	a	a	a,b	a	a	a	c		a	c	a	b	d	b	c	b	a	a	c	2	2	3	2	3
Rozprza	gimnazjum	1	a	c	g	e	b	e	e	d	a	b	c	b	c			d		b	b	b	b	b	a	a	c			b	b	b		b	c	b	b	c	b	b	b	a	d	d	4	4	4	4	4
Rozprza	gimnazjum	1	a	d	g	d	b	g	e	e	a	b	b	b	e	b		c		b	b	b	b	a	f	e	a	a,b	c	b	a	b		c	a	a	d	a	b	a	a	a	a	a	1	2	1	3	1
Rozprza	gimnazjum	1	a	c	g	c	b	b	b	e	a	c	c	d	e	b	5	c		a	a	a	b	a	b	a	a	c	b	b	a	b		c	c	b	b	c	b	b	c	d	d	d	5	5	5	5	5
Rozprza	gimnazjum	1	a	b	g	c	b	c	c	b	a	g	e	d	e	c	10	b		c	c	c	e	a	a	a	a	d	c	c	c	e	b	d	c	a	d	c	a	b	c	d	d	d	4	4	2	4	5
Rozprza	gimnazjum	1	a	b	g	c	b	c	b	b	a	c	c	b	d			b		a	a	a	a	a	f	b	a	a	a	a	b	g		a	c	a	d	c	c	b	b	c	c	d	5	5	5	5	5
Rozprza	gimnazjum	2	a	b	g	d	b	h3	e	c	a	a	b	f	d			e		b	b	b	a	b	c	c	b			a	c	b		c	d	a	a	b	a	c	b	b	c	c	5	3	3	4	5
Rozprza	gimnazjum	2	a	d	a	a	a	a	a	a	a	b	a	a	e	b	18	a	e	a	a	c	b	a	b	a	a	e	c	a	c	e	a	c	a	b	a	d	c	c	b	b	d	a	3	3	5	3	3
Rozprza	gimnazjum	2	a	d	a	a	a	a	a	a	a	c	a	a	e	b		a	e	c	c	c	e	a	e	a	a	a,c	c	c	b	g		c	a	a	a	d	c	c	b	d	b	d	4	4	4	4	4
Rozprza	gimnazjum	2	a	c	g	e	b	e	e	d	a	b	c	b	c			d		b	b	b	b	b	a	a	c			b	b	b		b	c	b	b	c	b	b	b	a	d	d	4	4	4	4	4
Rozprza	gimnazjum	2	a	d	g	c	b	g	e	e	a	b	c	d	e	b		c		b	b	b	b	a	f	e	a	a,b	c	b	a	b		c	a	a	d	a	b	a	a	a	a	a	1	2	1	3	1
Rozprza	gimnazjum	2	a	c	g	c	b	b	b	e	a	c	c	d	e	b	5	c		a	a	a	b	a	b	a	a	c	b	b	a	b		c	c	b	b	c	b	b	c	d	d	d	5	5	5	5	5
Rozprza	gimnazjum	2	a	b	g	d	b	c	c	b	a	g	e	d	e	c	10	b		c	c	c	e	a	a	a	a	d	c	c	c	e	b	d	c	a	d	c	a	b	c	d	d	d	4	4	2	4	5
Rozprza	gimnazjum	2	a	b	g	d	b	c	b	b	a	c	c	b	d			b		a	a	a	a	a	f	b	a	a	a	a	b	g		a	c	a	d	c	c	b	b	c	c	d	5	5	5	5	5
Rozprza	gimnazjum	3	a	b	a	a	a	a	a	a	a	g	a	a	g			a	e	c	c	c	e	c	a	a	a	a,b,c,d	a	a	a	f		d	a	b	a	b	c	c	a	b	b	a	5	3	3	5	5
Rozprza	gimnazjum	3	a	b	g	c	b	b	e	c	a	e	c	d	f			c		a	c	a	e	c	f	a	a	b	c	c	c	g		c	d	a	d	d	c	c	b	d	c	d	5	5	3	5	5
Rozprza	gimnazjum	3	a	d	g	d	b	b	e	e	a	b	e	f	g			b		c	c	c	a	a	a	a	a	a	c	b	b	g		c	d	a	d	d	c	c	c	d	c	a	4	4	3	3	4
Rozprza	gimnazjum	3	a	e	g	c	b	b	e	d	b	a	f	d	g			c		a	c	c	d	b	a	a	a	a	b	b	b	g		b	d	b	d	d	c	c	b	d	d	c	5	2	5	1	5
Rozprza	gimnazjum	3	a	d	a	a	a	a	a	a	a	g	a	a	d			a	e	a	c	b	b	a	f	f	c			c	c	g		c	a	a	a	b	c	c	c	b	b	c	4	1	1	4	4
Rozprza	gimnazjum	3	a	e	g	c	b	h6	e	e	a	b	f	d	e	b		b		a	a	c	e	b	f	a	a	b	a	a	c	g		c	a	a	d	b	b	b	c	c	c	d	5	5	5	5	5
Rozprza	gimnazjum	3	a	d	g	c	b	h7	e	c	a	g	g1	g4	g			c		c	c	c	e	c	f	f	c			c	a	g		a	d	a	d	d	b	b	b	d	d	d	5	5	1	3	5
Rozprza	gimnazjum	3	a	d	g	c	g	h4	e	c	a	b	c	d	b			c		a	a	b	e	c	f	a	c			b	a	g		b	d	a	d	d	c	b	c	b	c	b	3	2	3	1	4
Rozprza	gimnazjum	3	a	e	g	d	b	b	e	e	a	b	g1	g4	e	b		c		a	a	a	b	a	e	a	a	d	a	a	a	e	b	c	d	b	d	d	a	b	c	d	c	d	5	4	3	3	5
Rozprza	gimnazjum	3	a	e	g	d	g	e	e	d	a	g	f	d	e	b		c		a	a	a	b	b	a	a	a	a	a	a	b	e	b	b	c	a	d	d	c	b	c	d	d	a	5	4	5	5	5
Rozprza	gimnazjum	3	a	c	g	d	d	b	e	e	a	d	c	f	g			b		c	c	c	e	c	f	f	c			c	c	g		e	b	a	c	b	c	b	b	c	c	c	1	2	2	5	4
Rozprza	gimnazjum	3	a	e	g	c	g	e	e	e	a	d	c	d	e	a		c		b	a	a	e	b	b	d	a	a	c	b	b	g		d	c	a	d	c	b	b	b	c	b	b	5	4	3	5	4
Dąbrowa		1	a	e	a	a	a	a	a	a	a	g	a	a	d			a	c	b	b	b	d	b	e	a	a	b	a	a	a	c		a	d	b	d	d	a	a	b	a	d	a	1	1	1	1	1
Dąbrowa		1	a	e	g	g	g	b	e	f	a	g	c	b	d			d	c	b	b	b	d	b	e	a	a	b	a	a	a	c		a	d	b	d	d	a	a	b	a	d	a	1	1	1	1	1
Dąbrowa		1	a	e	a	a	a	a	a	a	a	a	a	a	e	b		a	b	a	a	c	b	b	f	a	a	a,c,d	c	c	a	f		d	a	b	a	c	c	b	a	d	c	d	5	4	4	5	5
Dąbrowa		1	a	d	b	b	d	e	b	b	a	a	e	f	e	c	0	a	a	a	a	a	a	a	d	a	a	a,b,c,d	a	b	a	e	a	a	b	a	a	c	b	b	c	d	b	b	5	3	5	5	5
Dąbrowa		1	a	d	a	a	a	a	a	a	a	b	a	a	e	b	1	a	b	c	c	c	e	a	e	a	a	a,c,d	c	a	a	e	a	a	c	b	d	d	c	c	c	d	c	d	5	5	3	4	4
Dąbrowa		1	a	e	a	a	a	a	a	a	a	a	a	a	e	b	2	a	b	a	a	c	b	b	f	a	a	a,c,d	c	c	a	f		d	a	b	a	c	c	b	a	d	c	d	5	4	4	5	5
Dąbrowa		1	a	e	b	b	d	e	b	b	a	a	e	f	e	c	3	a	a	a	a	a	a	a	d	a	a	a,b,c,d	a	b	a	e	a	a	b	a	a	c	b	b	c	d	b	b	5	3	5	5	5
Dąbrowa		1	b	a	a	a	a	a	a	a	b	a	a	a	e	b		a	b	a	a	a	b	b	f	a	a	a,b,c,d	a	b	a	e	a	c	a	a	a	a	c	c	c	d	b	d	5	5	4	5	5
Dąbrowa		1	b	a	a	a	a	a	a	a	b	a	a	a	e	b		a	b	a	a	a	b	b	f	a	a	a,b,c,d	a	b	a	e	a	c	a	a	a	a	c	c	c	d	b	d	5	5	4	5	5
Dąbrowa		1	b	a	a	a	a	a	a	a	b	a	a	a	e	b		a	b	a	a	a	b	b	f	a	a	a,b,c,d	a	b	a	e	a	c	a	a	a	a	c	c	c	d	b	d	5	5	4	5	5
Dąbrowa		1	b	a	a	a	a	a	a	a	a	a	a	a	e	c	3	a	e	a	a	c	b	a	a	f	c			c	c	e	a	d	a	b	c	c	b	b	a	d	c	a	5	1	2	3	5
Dąbrowa		1	b	a	a	a	a	a	a	a	a	a	a	a	e	c	3	a	e	a	a	c	b	a	a	f	c			c	c	e	a	d	a	b	c	c	b	b	a	d	c	a	5	1	2	3	5
Dąbrowa		1	b	a	a	a	a	a	a	a	b	a	a	a	e	b	4	a	e	a	a	a	b	a	e	a	a	c,d	b	a	c	e	a	a	a	a	a	b	b	b	b	d	c	d	4	2	3	4	5
Dąbrowa		1	b	a	a	a	a	a	a	a	b	a	a	a	e	b	5	a	e	a	a	a	b	a	f	a	a	a	c	c	a	e	b	a	a	a	a	a	b	b	b	d	a	d	5	5	4	3	5
Dąbrowa		1	b	a	a	a	a	a	a	a	b	a	a	a	e	b		a	b	a	a	a	b	b	f	a	a	a,b,c,d	a	b	a	e	a	c	a	a	a	a	c	c	c	d	b	d	5	5	4	5	5
Dąbrowa		1	b	a	a	a	a	a	a	a	b	a	a	a	e	b		a	b	a	a	a	b	b	f	a	a	a,b,c,d	a	b	a	e	a	c	a	a	a	a	c	c	c	d	b	d	5	5	4	5	5
Dąbrowa		1	b	a	a	a	a	a	a	a	b	a	a	a	e	b		a	b	a	a	a	b	b	f	a	a	a,b,c,d	a	b	a	e	a	c	a	a	a	a	c	c	c	d	b	d	5	5	4	5	5
Dąbrowa		1	b	a	a	a	a	a	a	a	a	a	a	a	e	c		a	e	a	a	c	b	a	a	f	c			c	c	e	a	d	a	b	c	c	b	b	a	d	c	a	5	1	2	3	5
Dąbrowa		1	b	a	a	a	a	a	a	a	a	a	a	a	e	c		a	e	a	a	c	b	a	a	f	c			c	c	e	a	d	a	b	c	c	b	b	a	d	c	a	5	1	2	3	5
Dąbrowa		1	b	a	a	a	a	a	a	a	b	a	a	a	e	b		a	e	a	a	a	b	a	e	a	a	c,d	b	a	c	e	a	a	a	a	a	b	b	b	b	d	c	d	4	2	3	4	5
Dąbrowa		1	b	a	a	a	a	a	a	a	b	a	a	a	e	b		a	e	a	a	a	b	a	f	a	a	a	c	c	a	e	b	a	a	a	a	a	b	b	b	d	a	d	5	5	4	3	5
Dąbrowa		1	b	a	a	a	a	a	a	a	b	a	a	a	e	b		a	b	a	a	a	b	b	f	a	a	a,b,c,d	a	b	a	e	a	c	a	a	a	a	c	c	c	d	b	d	5	5	4	5	5
Dąbrowa		1	b	a	a	a	a	a	a	a	b	a	a	a	e	b		a	b	a	a	a	b	b	f	a	a	a,b,c,d	a	b	a	e	a	c	a	a	a	a	c	c	c	d	b	d	5	5	4	5	5
Dąbrowa		1	a	c	a	a	a	a	a	a	b	a	a	a	e	b		a	b	a	a	a	b	b	f	a	a	a,b,c,d	a	b	a	e	a	c	a	a	a	a	c	c	c	d	b	d	5	5	4	5	5
Dąbrowa		1	a	c	a	a	a	a	a	a	a	a	a	a	e	c		a	e	a	a	c	b	a	a	f	c			c	c	e	a	d	a	b	c	c	b	b	a	d	c	a	5	1	2	3	5
Dąbrowa		1	a	c	a	a	a	a	a	a	a	a	a	a	e	c		a	e	a	a	c	b	a	a	f	c			c	c	e	a	d	a	b	c	c	b	b	a	d	c	a	5	1	2	3	5
Dąbrowa		1	b	a	a	a	a	a	a	a	b	a	a	a	e	c		a	e	a	c	c	e	c	e	f	a	a,b,c	a	a	c	e	a	c	a	a	a	c	c	c	c	d	b	d	5	4	3	4	4
Dąbrowa		1	b	a	a	a	a	a	a	a	b	a	a	a	e	a	5	a	c	a	a	a	b	a	b	b	a	b,c,d	a	a	c	g		c	a	a	a	b	c	c	a	d	b	d	5	5	5	5	5
Dąbrowa		1	a	c	a	a	a	a	a	a	b	a	a	a	d			a	a	a	b	a	b	b	a	a	b			a	b	d	a	a	a	a	a	a	b	b	c	d	c	d	4	3	3	4	4
Dąbrowa		1	a	c	a	a	a	a	a	a	b	a	a	a	d			a	a	a	b	a	b	b	a	a	b			a	b	d	a	a	a	a	a	a	b	b	c	d	c	d	4	3	3	4	4
Dąbrowa		1	b	a	a	a	a	a	a	a	b	a	a	a	e	c		a	e	a	c	c	e	c	e	f	a	a,b,c	a	a	c	e	a	c	a	a	a	c	c	c	c	d	b	d	5	4	3	4	4
Dąbrowa		1	b	a	a	a	a	a	a	a	b	a	a	a	e	a	5	a	c	a	a	a	b	a	b	b	a	b,c,d	a	a	c	g		c	a	a	a	b	c	c	a	d	b	d	5	5	5	5	5
Dąbrowa		1	b	a	a	a	a	a	a	a	b	a	a	a	e	c		a	e	a	c	c	e	c	e	f	a	a,b,c	a	a	c	e	a	c	a	a	b	c	c	c	c	d	b	d	5	4	3	4	4
Dąbrowa		1	b	a	a	a	a	a	a	a	b	a	a	a	e	c		a	e	a	c	c	e	c	e	f	a	a,b,c	a	a	c	e	a	c	a	a	b	c	c	c	c	d	b	d	5	4	3	4	4
Dąbrowa		1	b	a	a	a	a	a	a	a	b	a	a	a	e	c		a	e	a	c	c	e	c	e	f	a	a,b,c	a	a	c	e	a	c	a	a	b	c	c	c	c	d	b	d	5	4	3	4	4
Dąbrowa		1	b	a	a	a	a	a	a	a	b	a	a	a	e	a	5	a	c	a	a	a	b	a	b	b	a	b,c,d	a	a	c	g		c	a	a	a	b	c	c	a	d	b	d	5	5	5	5	5
Dąbrowa		1	a	c	a	a	a	a	a	a	b	a	a	a	d			a	a	a	b	a	b	b	a	a	b			a	b	d	a	a	a	a	a	a	b	b	c	d	c	d	4	3	3	4	4
Dąbrowa		1	a	c	a	a	a	a	a	a	b	a	a	a	d			a	a	a	b	a	b	b	a	a	b			a	b	d	a	a	a	a	a	a	b	b	c	d	c	d	4	3	3	4	4
Dąbrowa		1	b	a	a	a	a	a	a	a	b	a	a	a	e	c		a	e	a	c	c	e	c	e	f	a	a,b,c	a	a	c	e	a	c	a	a	b	c	c	c	c	d	b	d	5	4	3	4	4
Dąbrowa		1	b	a	a	a	a	a	a	a	b	a	a	a	e	a	5	a	c	a	a	a	b	a	b	b	a	b,c,d	a	a	c	g		c	a	a	a	b	c	c	a	d	b	d	5	5	5	5	5
Dąbrowa		1	b	a	a	a	a	a	a	a	b	a	a	a	e	c		a	e	a	c	c	e	c	e	f	a	a,b,c	a	a	c	e	a	c	a	a	b	c	c	c	c	d	b	d	5	4	3	4	4
Dąbrowa		1	b	a	a	a	a	a	a	a	b	a	a	a	e	c		a	e	a	c	c	e	c	e	f	a	a,b,c	a	a	c	e	a	c	a	a	a	c	c	c	c	d	b	d	5	4	3	4	4
Dąbrowa		1	a	e	g	d	b	e	e	d	a	b	e	f	e	a		b	a	a	a	a	b	a	a	e	a	b,c,d	a	c	a	e	b	c	d	a	c	d	c	b	b	d	b	d	5	5	4	4	5
Dąbrowa		1	a	d	b	b	b	b	b	b	a	g	c	f	e	c		a	a	b	a	a	b	a	c	b	a	a,b,d	a	a	c	d	a	a	b	a	d	a	b	b	c	d	b	d	5	5	4	5	5
Dąbrowa		1	a	e	a	a	a	a	a	a	a	g	a	a	e	b		a	e	a	a	a	a,b	a	b	a	a	b,c,d	c	c	a	e	a	a	c	a	c	d	b	b	c	d	c	d	5	5	3	5	5
Dąbrowa		1	a	b	a	a	a	a	a	a	a	b	a	a	e	a		a	a	a	a	a	b	b	f	a	a	c	c	a	c	e	a	a	c	a	c	c	c	c	b	d	b	d	5	5	5	5	5
Dąbrowa		1	a	d	a	a	a	a	a	a	b	a	a	a	e	c		a	e	a	a	a	b	a	f	f	a	a,b,c,d	c	c	a	e	a	c	a	a	a	c	c	c	b	c	b	c	4	4	3	4	4
Dąbrowa		1	a	e	f	d	b	e	b	e	a	e	e	d	e	c		b	e	a	a	a	b	a	e	a	a	a,b,c,d	c	c	a	e	a	ad	d	a	d	c	c	b	c	d	c	d	5	5	3	3	5
Dąbrowa		1	a	d	a	a	a	a	a	a	a	g	a	a	e	c		a	a	b	a	a	b	a	c	b	a	a,b,d	a	a	c	d	a	a	b	a	d	a	b	b	c	d	b	d	5	5	4	5	5
Dąbrowa		2	a	e	c	c	b	b	b	b	a	g	e	f	e	b		a	e	a	a	a	a,b	a	b	a	a	b,c,d	c	c	a	e	a	a	c	a	c	d	b	b	c	d	c	d	5	5	3	5	5
Dąbrowa		2	a	f	b	b	b	b	b	b	a	g	c	f	e	c		a	a	b	a	a	b	a	c	b	a	a,b,d	a	a	c	d	a	a	b	a	d	a	b	b	c	d	b	d	5	5	4	5	5
Dąbrowa		2	a	d	g	f	b	b	b	b	a	e	c	e	e	b	18	b	a	b	b	b	d	b	a	a	a	a,b,c,d	b	a	b	c		c	a	a	c	c	a	b	b	b	d	a	4	4	4	4	4
Dąbrowa		2	a	c	g	c	d	b	b	b	a	e	g	f	e	c			b	c	c	c	e	a	f	f	a	a,b,c,d	c	c	c	g		g	c	a	d	c	c	c	b	c	c	c	5	3	4	4	4
Dąbrowa		2	a	d	a	a	a	a	a	a	a	g	a	a	e	b		a	e	a	a	a	a,b	a	b	a	a	b,c,d	c	c	a	e	a	a	c	a	c	d	b	b	c	d	c	d	5	5	3	5	5
Dąbrowa		2	a	d	e	d	b	b	d	e	a	e	b	f	e	c		a	b	a	a	a	b	a	f	a	a	b,c	c	a	a	g		a	a	a	b	c	b	b	a	d	b	b	5	4	3	4	4
Dąbrowa		2	a	d	e	d	b	b	d	e	a	e	b	f	e	c		a	b	a	a	a	b	a	f	a	a	b,c	c	a	a	g		a	a	a	b	c	b	b	a	d	b	b	5	4	3	4	4
Dąbrowa		2	a	d	e	d	b	b	d	e	a	e	b	f	e	c		a	b	a	a	a	b	a	f	a	a	b,c	c	a	a	g		a	a	a	b	c	b	b	a	d	b	b	5	4	3	4	4
Dąbrowa		2	a	d	e	d	b	b	d	e	a	e	b	f	e	c		a	b	a	a	a	b	a	f	a	a	b,c	c	a	a	g		a	a	a	b	c	b	b	a	d	b	b	5	4	3	4	4
Dąbrowa		2	a	d	e	d	b	h1	d	e	a	e	b	f	e	c		a	b	a	a	a	b	a	f	a	a	b,c	c	a	a	g		a	a	a	b	c	b	b	a	d	b	b	5	4	3	4	4
Dąbrowa		2	a	d	e	d	b	b	d	e	a	e	b	f	e	c		a	b	a	a	a	b	a	f	a	a	b,c	c	a	a	g		a	a	a	b	c	b	b	a	d	b	b	5	4	3	4	4
Dąbrowa		2	a	d	e	d	b	b	d	e	a	e	b	f	e	c		a	b	a	a	a	b	a	f	a	a	b,c	c	a	a	g		a	a	a	b	c	b	b	a	d	b	b	5	4	3	4	4
Dąbrowa		2	a	d	e	d	b	b	d	e	a	e	b	f	e	c		a	b	a	a	a	b	a	f	a	a	b,c	c	a	a	g		a	a	a	b	c	b	b	a	d	b	b	5	4	3	4	4
Dąbrowa		2	a	d	e	d	b	c	d	e	a	e	b	f	e	c		a	b	a	a	a	b	a	f	a	a	b,c	c	a	a	g		a	a	a	b	c	b	b	a	d	b	b	5	4	3	4	4
Dąbrowa		2	a	d	e	d	b	c	d	e	a	e	b	f	e	c		a	b	a	a	a	b	a	f	a	a	b,c	c	a	a	g		a	a	a	b	c	b	b	a	d	b	b	5	4	3	4	4
Dąbrowa		2	a	d	e	d	b	d	d	e	a	e	b	f	e	c		a	b	a	a	a	b	a	f	a	a	b,c	c	a	a	g		a	a	a	b	c	b	b	a	d	b	b	5	4	3	4	4
Dąbrowa		2	a	d	e	d	b	d	d	e	a	e	b	f	e	c		a	b	a	a	a	b	a	f	a	a	b,c	c	a	a	g		a	a	a	b	c	b	b	a	d	b	b	5	4	3	4	4
Dąbrowa		2	a	f	a	a	a	a	a	a	a	a	a	a	e	c		a	d	a	c	a	b	a	e	a	a	a,b,c,d	a	a	a	e	a	a	a	a	c	c	c	b	c	d	b	d	1	1	4	1	1
Dąbrowa		2	a	f	a	a	a	a	a	a	b	a	a	a	e	a		a	e	a	a	a	b	a	e	d	a	a,b,c,d	a	a	a	e	a	a	b	a	a	a	b	a	b	d	b	c	5	4	4	5	5
Dąbrowa		2	a	f	a	a	a	a	a	a	a	a	a	a	e	a		a	e	c	c	c	e	c	f	f	c			c	c	d	d	a	a	a	c	c	b	b	c	d	d	d	5	5	5	4	5
Dąbrowa		2	a	f	a	a	a	a	a	a	a	a	a	a	e	c		a	e	c	c	c	e	c	f	e	c			c	c	e	a	a	b	a	c	c	c	b	c	d	b	d	1	1	1	1	1
Dąbrowa		2	a	f	a	a	a	a	a	a	a	a	a	a	e	a		a	e	c	c	a	e	b	e	e	a	d	c	c	c	g		b	a	a	b	c	c	b	c	a	b	c	4	3	4	4	4
Dąbrowa		2	a	f	a	a	a	a	a	a	b	a	a	a	c			a	e	a	a	a	b	c	c	f	a	b	a	a	a	g		b	a	b	d	a	a	b	b	d	c	d	5	4	3	4	5
Dąbrowa		2	a	f	a	a	a	a	a	a	b	a	a	a	e	c		a	e	c	c	c	e	c	f	f	c			a	a	e	b	b	b	a	b	c	b	b	b	d	b	d	5	5	3	1	5
Dąbrowa		2	a	f	a	a	a	a	a	a	b	a	a	a	e	b	7	a	e	b	b	b	b	a	f	a	b			b	b	e	b	d	a	b	a	a	b	b	b	d	a	c	5	3	3	4	4
Dąbrowa		2	a	f	a	a	a	a	a	a	b	a	a	a	e	c	20	a	e	b	b	b	b	b	f	f	c			c	b	c		a	a	a	a	b	c	b	c	d	a	c	4	3	3	3	5
Dąbrowa		2	a	f	a	a	a	a	a	a	b	a	a	a	e	c	20	a	e	b	b	b	b	b	f	f	c			c	b	c		a	a	a	a	b	c	b	c	d	a	c	4	3	3	3	5
Dąbrowa		2	a	f	a	a	a	a	a	a	a	a	a	a	e	c		a	d	a	c	a	b	a	e	a	a	a,b,c,d	a	a	a	e	a	a	a	a	c	c	c	b	c	d	b	d	1	1	4	1	1
Dąbrowa		2	a	f	a	a	a	a	a	a	b	a	a	a	e	a		a	e	a	a	a	b	a	e	d	a	a,b,c,d	a	a	a	e	a	a	b	a	a	a	b	a	b	d	b	c	5	4	4	5	5
Dąbrowa		2	a	f	a	a	a	a	a	a	a	a	a	a	e	a		a	e	c	c	c	e	c	f	f	c			c	c	d	d	a	a	a	c	c	b	b	c	d	d	d	5	5	5	4	5
Dąbrowa		2	a	f	a	a	a	a	a	a	a	a	a	a	e	c		a	e	c	c	c	e	c	f	e	c			c	c	e	a	a	b	a	c	c	c	b	c	d	b	d	1	1	1	1	1
Dąbrowa		2	a	e	a	a	a	a	a	a	a	a	a	a	c			a	b	c	b	c	d	b	a	a	b			b	b	d	b	b	a	b	b	d	b	b	b	d	b	c	4	4	3	3	5
Dąbrowa		2	a	e	a	a	a	a	a	a	a	a	a	a	c			a	b	c	b	c	d	b	a	a	b			b	b	d	b	b	a	b	b	d	b	b	b	d	b	c	4	4	3	3	5
Dąbrowa		2	a	e	a	a	a	a	a	a	a	a	a	a	c			a	b	c	b	c	d	b	a	a	b			b	b	d	b	b	a	b	b	d	b	b	b	d	b	c	4	4	3	3	5
Dąbrowa		2	a	e	a	a	a	a	a	a	a	a	a	a	c			a	b	c	b	c	d	b	a	a	b			b	b	d	b	d	a	b	b	d	b	b	b	d	b	c	4	4	3	3	5
Dąbrowa		2	a	e	a	a	a	a	a	a	a	a	a	a	c			a	b	c	b	c	d	b	a	a	b			b	b	d	b	d	a	b	b	d	b	b	b	d	b	c	4	4	3	3	5
Dąbrowa		2	a	e	a	a	a	a	a	a	a	a	a	a	c			a	b	c	b	c	d	b	a	a	b			b	b	d	b	d	a	b	b	d	b	b	b	d	b	c	4	4	3	3	5
Dąbrowa		2	a	e	a	a	a	a	a	a	a	a	a	a	c			a	b	c	b	c	d	b	a	a	b			b	b	d	b	d	a	b	b	d	b	b	b	d	b	c	4	4	3	3	5
Dąbrowa		2	a	e	a	a	a	a	a	a	a	a	a	a	c			a	b	c	b	c	d	b	a	a	b			b	b	d	b	d	a	b	b	d	b	b	b	d	b	c	4	4	3	3	5
Dąbrowa		2	a	e	a	a	a	a	a	a	a	a	a	a	c			a	b	c	b	c	d	b	a	a	b			b	b	d	b	d	a	b	b	d	b	b	b	d	b	c	4	4	3	3	5
Dąbrowa		3	a	d	g	d	g	e	b	c	a	c	b	f	e	a	16		e	a	c	e	a	a	f	a	a	c,d	a	c	a	e	a	d	c	a	c	c	b	b	b	d	b	c	4	4	3	4	4
Dąbrowa		3	a	d	g	e	b	c	e	e	a	a	f	f	e	a			e	c	c	c	b	b	a	e	a	c,d	a	a	a	f		a	d	a	d	d	c	b	b	c	c	a	4	2	5	3	4
Dąbrowa		3	a	d	g	d	b	c	c	b	a	b	f	f	g			b	e	c	c	c	e	c	f	f	c			c	c	g		e	c	a	c	c	c	c	c	d	c	c	3	3	3	3	3
Dąbrowa		3	a	f	a	a	a	a	a	a	a	d	a	a	e	c		a	e	a	a	a	b	a	e	c	a	b,c,d	c	a	a	e	a	c	a	a	a	c	c	c	b	d	b	c	5	5	5	4	5
Dąbrowa		3	a	f	b	b	g	c	a	a	b	a	e	f	e	b	0	a	e	a	a	a	a,b	a	a	e	a	b	a	a	a	e	a	a	b	a	c	c	b	b	b	d	b	c	5	5	4	4	5
Dąbrowa		3	a	f	e	c	g	b	b	c	a	a	g	f	e	c		a	e	a	a	a	b	c	b	f	a	d	c	c	c	g		d	a	a	b	b	c	b	b	d	b	b	5	5	3	5	5
Dąbrowa		3	a	f	a	a	a	a	a	a	a	e	a	a	e	c		a	e	a	a	a	b	c	b	f	c			c	a	c		d	a	a	a	d	c	c	c	d	c	c	4	3	3	3	4
Dąbrowa		3	a	f	c	c	c	g	e	c	a	d	f	f	e	c		b	e	a	a	a	b	a	e	c	a	b,c,d	c	a	a	e	a	c	c	a	c	c	c	c	b	d	b	c	5	5	5	4	5
Dąbrowa		3	a	f	b	b	g	c	a	a	b	a	e	f	e	b	0	a	e	a	a	a	a,b	a	a	e	a	b	a	a	a	e	a	a	b	a	c	c	b	b	b	d	b	c	5	5	4	4	5
Dąbrowa		3	a	f	f	d	g	e	b	c	a	a	b	f	e	a	0		e	a	c	e	a	a	f	a	a	c,d	a	c	a	e	a	d	c	a	c	c	b	b	b	d	b	c	4	4	3	4	4
Dąbrowa		3	a	f	e	c	g	b	b	c	a	a	g	f	e	c		a	e	a	a	a	b	c	b	f	a	d	c	c	c	g		d	a	a	b	b	c	b	b	d	b	b	5	5	3	5	5
Dąbrowa		3	a	f	a	a	a	a	a	a	a	b	a	a	c			a	e	a	a	a	e	c	b	c	a	b	c	a	c	g		a	c	a	c	d	c	c	b	d	c	c	4	3	3	3	3
Dąbrowa		3	a	f	a	a	a	a	a	a	a	e	a	a	e	c		a	e	a	a	a	b	c	b	f	c			c	a	c		d	a	a	a	d	c	c	c	d	c	c	4	3	3	3	4
Dąbrowa		3	a	f	e	e	b	c	e	c	a	b	d	f	e	c		a	e	c	c	c	e	c	a	f	c			c	c	a		e	a	b	a	a	c	c	c	a	a	a	4	4	4	4	4
Dąbrowa		3	a	f	b	b	d	g	a	b	a	c	e	f	e	a		a	e	a	a	a	b	b	a	e	c			a	c	g		b	b	b	c	c	c	b	b	d	b	d	5	5	3	4	5
Dąbrowa		3	a	f	a	a	a	a	a	a	a	b	a	a	d			a	a	a	b	b	b	a	b	a	c			b	a	a		b	a	a	c	a	c	a	c	c	b	c	3	4	3	1	3
Dąbrowa		3	a	f	a	a	a	a	a	a	a	d	a	a	e	c		a	e	a	a	a	b	a	e	c	a	b,c,d	c	a	a	e	a	c	a	a	a	c	c	c	b	d	b	c	5	5	5	4	5
Dąbrowa		3	a	f	f	e	b	c	e	e	a	a	d	f	e	a			e	c	c	c	b	b	a	e	a	c,d	a	a	a	f		a	d	a	d	d	c	b	b	c	c	a	4	2	5	3	4
Dąbrowa		3	a	f	c	c	c	g	e	c	a	d	f	f	e	c		b	e	a	a	a	b	a	e	c	a	b,c,d	c	a	a	e	a	c	c	a	c	c	c	c	b	d	b	c	5	5	5	4	5
Dąbrowa		3	a	f	f	e	b	c	e	e	a	a	d	f	e	a			e	c	c	c	b	b	a	e	a	c,d	a	a	a	f		a	d	a	d	d	c	b	b	c	c	a	4	2	5	3	4
Dąbrowa		3	a	f	a	a	a	a	a	a	b	a	a	a	e	b	10	a	d	a	a	a	a	b	d	d	c			c	c	e	a	a	c	b	c	b	a	c	a	c	c	a	4	4	4	4	4
Dąbrowa		3	a	f	a	a	a	a	a	a	a	a	a	a	e	c		a	d	a	c	a	b	a	e	a	a	a,b,c,d	a	a	a	e	a	a	a	a	c	c	c	b	c	d	b	d	1	1	4	1	1
Dąbrowa		3	a	f	a	a	a	a	a	a	b	a	a	a	e	a		a	e	a	a	a	b	a	e	d	a	a,b,c,d	a	a	a	e	a	a	b	a	a	a	b	a	b	d	b	c	5	4	4	5	5
Dąbrowa		3	a	f	a	a	a	a	a	a	a	e	a	a	e	c		a	e	a	a	a	a	a	a	a	a	a,b,c,d	a	a	b	d	a	a	a	b	c	c	b	b	c	c	b	d	5	5	4	5	5
Dąbrowa		3	a	f	a	a	a	a	a	a	a	a	a	a	e	a		a	e	c	c	a	e	b	e	e	a	d	c	c	c	g		d	a	a	b	c	c	b	c	a	b	c	4	3	4	4	4
Dąbrowa		3	a	f	a	a	a	a	a	a	b	a	a	a	c			a	e	a	a	a	b	c	c	f	a	b	a	a	a	g		d	a	b	d	a	a	b	b	d	c	d	5	4	3	4	5
Dąbrowa		3	a	f	a	a	a	a	a	a	b	a	a	a	e	c		a	e	c	c	c	e	c	f	f	c			a	a	e	b	b	b	a	b	c	b	b	b	d	b	d	5	5	3	1	5
Dąbrowa		3	a	f	g	d	c	b	e	d	a	e	f	c	e	c			e	a	a	a	b	c	b	f	c			c	a	c		d	b	a	c	d	c	c	c	d	c	c	4	3	3	3	4
Dąbrowa		3	a	f	g	d	c	b	e	d	a	b	e	e	c			a	e	a	a	a	e	c	b	c	a	b	c	a	c	g		a	c	a	c	d	c	c	b	d	c	c	4	3	3	3	3
Dąbrowa		3	a	e	a	a	a	a	a	a	b	a	a	a	e	b	10	a	d	a	a	a	a	b	d	d	c			c	c	e	a	a	c	b	c	b	a	c	a	c	c	a	4	4	4	4	4
Dąbrowa		3	a	e	a	a	a	a	a	a	a	e	a	a	e	c		a	e	a	a	a	a	a	a	a	a	a,b,c,d	a	a	b	d	a	a	a	b	c	c	b	b	c	c	b	d	5	5	4	5	5
Dąbrowa		3	a	e	a	a	a	a	a	a	b	a	a	a	e	c		a	e	c	c	c	e	a	f	e	a	c,d	a	a	a	d	b	a	b	a	b	b	b	b	b	d	b	d	5	5	3	5	5
Dąbrowa		3	a	e	a	a	a	a	a	a	b	a	a	a	e	a		a	e	a	a	a	a	a	f	f	a	d	a	c	c	e	b	a	a	b	a	a	c	b	b	d	b	c	4	4	3	3	4
Dąbrowa		3	a	e	a	a	a	a	a	a	a	c	a	a	e	b		a	d	c	c	c	d	c	a	b	a	a,b,c	c	c	c	e	b	a	c	a	d	d	c	c	b	c	b	c	4	3	2	3	4
Dąbrowa		3	a	e	a	a	a	a	a	a	a	c	a	a	c			a	e	c	c	c	d	b	a	d	a	b,c,d	b	b	c	e	b	a	c	a	c	d	c	b	c	c	b	b	4	1	1	2	4
Dąbrowa		3	a	e	a	a	a	a	a	a	a	b	a	a	d			a	e	b	c	c	d	b	e	a	c			a	b	f		a	a	a	c	d	b	b	b	d	b	c	5	4	3	5	5
Dąbrowa		3	a	e	a	a	a	a	a	a	a	b	a	a	e	a		a	e	c	c	a	b	a	d	f	c			a	a	e	b	a	b	b	c	c	c	c	b	d	b	c	5	4	3	4	5
Dąbrowa		3	a	e	a	a	a	a	a	a	b	a	a	a	e	a		a	e	c	c	a	b	c	e	f	c			a	a	e	a	a	a	a	b	b	b	b	b	d	b	b	5	4	3	4	5
Dąbrowa		3	a	e	a	a	a	a	a	a	a	c	a	a	e	b		a	d	c	c	c	d	c	a	b	a	a,b,c	c	c	c	e	b	a	c	a	d	d	c	c	b	c	b	c	4	3	2	3	4
Dąbrowa		3	a	e	a	a	a	a	a	a	a	c	a	a	c			a	e	c	c	c	b	b	a	d	a	b,c,d	b	b	c	e	b	a	c	a	c	d	c	b	c	c	b	b	4	1	1	2	4
Dąbrowa		3	a	e	a	a	a	a	a	a	a	b	a	a	d			a	e	b	c	c	d	b	e	a	c			c	a	b		d	a	a	a	c	b	b	b	b	d	b	5	4	3	5	5
Dąbrowa		3	a	f	a	a	a	a	a	a	a	b	a	a	e	a		a	e	c	a	a	a	a	f	c	c			a	a	b		b	b	c	c	c	c	c	b	d	b	c	5	4	3	4	5
Dąbrowa		3	a	e	a	a	a	a	a	a	b	a	a	a	e	a		a	e	c	c	a	b	c	e	f	c			a	a	e	a	a	a	a	b	b	b	b	b	d	b	b	5	4	3	4	5
Dąbrowa		3	b	a	a	a	a	a	a	a	b	a	a	a	e	b		a	c	c	c	c	e	a	b	b	c			c	c	e	a	a	c	b	a	b	c	c	b	c	b	c	4	4	3	4	4
Dąbrowa		3	b	a	a	a	a	a	a	a	b	a	a	a	e	a		a	e	a	a	a	b	a	e	f	a	a,b,c,d	a	a	a	e	a	c	a	b	a	a	b	b	a	d	a	d	1	1	1	4	4
Dąbrowa		3	b	a	a	a	a	a	a	a	b	a	a	a	e	b		a	e	a	a	a	b	a	e	f	a	a,b,c,d	a	a	a	e	a	a	a	a	a	a	c	c	c	d	b	d	5	5	4	4	5
Dąbrowa		3	b	a	a	a	a	a	a	a	b	a	a	a	e	a		a	e	a	a	a	b	a	e	c	a	a,c,d	a	c	a	e	a	a	b	a	b	c	c	b	b	d	b	d	5	5	4	4	5
Dąbrowa		3	b	a	a	a	a	a	a	a	b	a	a	a	e	c		a	e	a	a	a	b	b	f	f	a	b,c,d	a	b	a	e	a	a	b	a	b	b	b	b	b	d	a	d	5	4	4	4	5
Dąbrowa		3	b	a	a	a	a	a	a	a	b	a	a	a	e	a		a	e	c	a	a	b	a	f	f	a	c	a	a	b	c		c	a	a	b	a	c	c	a	a	a	c	5	4	3	5	5
Dąbrowa		3	b	a	a	a	a	a	a	a	b	a	a	a	e	a		a	e	c	a	a	b	a	f	f	a	c	a	a	b	c		c	a	a	b	a	c	c	a	a	a	c	5	4	3	5	5
Dąbrowa		3	b	a	a	a	a	a	a	a	b	a	a	a	a			a	e	a	a	a	b	b	e	f	a	b,d	b	c	a	c		d	a	b	a	a	a	a	c	c	c	c	1	2	3	4	4
Dąbrowa		3	b	a	a	a	a	a	a	a	b	a	a	a	e	a		a	e	a	a	a	e	a	f	f	a	a,b,c	a	a	a	e	a	a	b	b	b	b	c	b	b	a	b	d	5	5	4	4	5
Dąbrowa		3	b	a	a	a	a	a	a	a	b	a	a	a	e	a		a	e	a	a	a	b	c	f	f	a	b,d	a	a	a	e	a	a	a	a	a	b	b	b	a	d	a	d	5	4	5	5	4
Dąbrowa		3	b	a	a	a	a	a	a	a	b	a	a	a	e	a		a	e	a	a	a	b	a	e	f	a	b,c,d	a	a	a	e	a	a	a	a	a	a	b	b	b	d	a	d	5	5	4	4	5
Dąbrowa		3	b	a	a	a	a	a	a	a	b	a	a	a	e	c		a	e	a	a	a	b	b	f	f	a	b,c,d	a	b	a	e	a	a	b	a	b	b	b	b	b	d	a	d	5	4	4	4	5
Dąbrowa		3	b	a	a	a	a	a	a	a	b	a	a	a	e	c		a	e	a	a	a	b	a	f	f	a	b,c,d	a	b	a	e	a	a	a	a	a	a	b	b	b	d	a	d	5	4	4	5	5
Dąbrowa		3	b	a	a	a	a	a	a	a	b	a	a	a	e	c		a	e	a	a	a	b	a	f	f	a	b,c,d	a	b	a	e	a	a	a	a	a	a	b	b	b	d	a	d	5	5	5	5	5
Dąbrowa		3	b	a	a	a	a	a	a	a	b	a	a	a	e	a	5	a	e	c	a	a	b	a	f	d	a	b,c,d	a	c	c	g		a	c	a	a	b	b	b	c	d	a	c	5	4	2	5	5
Niechcice	gimnazjum	1	a	c	a	a	a	a	a	a	a	a	a	a	e	b	0	a	b	a	a	a	b	b	f	a	a	a,b,c,d	a	b	a	e	a	c	a	b	a	c	c	c	c	d	b	d	5	5	4	5	5
Niechcice	gimnazjum	1	b	a	a	a	a	a	a	a	b	a	a	a	e	b	0	a	b	a	a	a	b	b	f	a	a	a,b,c,d	a	b	a	e	a	a	a	a	a	a	c	c	c	d	b	d	5	5	4	5	5
Niechcice	gimnazjum	1	b	a	a	a	a	a	a	a	b	a	a	a	e	b	0	a	b	a	a	a	b	b	f	a	a	a,b,c,d	a	b	a	e	a	c	a	a	a	a	c	c	c	d	b	d	5	5	4	5	5
Niechcice	gimnazjum	1	b	a	a	a	a	a	a	a	a	a	a	a	e	c	0	a	e	a	a	c	b	a	a	f	c			c	c	e	a	d	a	b	a	c	b	b	a	d	c	a	5	1	2	3	5
Niechcice	gimnazjum	1	b	a	a	a	a	a	a	a	a	a	a	a	e	c	0	a	e	a	a	c	b	a	a	f	c			c	c	e	a	d	a	b	c	c	b	b	a	d	c	a	5	1	2	3	5
Niechcice	gimnazjum	1	b	a	a	a	a	a	a	a	b	a	a	a	e	b	0	a	e	a	a	a	b	a	e	a	a	c,d	b	a	c	e	a	a	a	a	a	b	b	b	b	d	c	d	4	2	3	4	5
Niechcice	gimnazjum	1	b	a	a	a	a	a	a	a	b	a	a	a	e	b	0	a	c	a	a	a	b	a	f	a	a	a	c	c	a	e	b	a	a	a	a	a	b	b	b	d	a	d	5	5	4	3	5
Niechcice	gimnazjum	1	b	a	a	a	a	a	a	a	b	a	a	a	e	b	0	a	b	a	a	a	b	b	f	a	a	a,b,c,d	a	b	a	e	a	c	a	a	a	a	c	c	c	d	b	d	5	5	4	5	5
Niechcice	gimnazjum	1	b	a	a	a	a	a	a	a	b	a	a	a	e	c	0	a	e	a	c	c	e	c	e	f	a	a,b,c	a	a	c	e	a	c	a	a	a	c	c	c	c	d	b	d	5	4	3	4	4
Niechcice	gimnazjum	1	b	a	a	a	a	a	a	a	b	a	a	a	e	a	0	a	c	a	a	a	b	a	b	b	a	b,c,d	a	a	c	g		c	a	a	a	b	c	c	a	d	b	d	5	5	5	5	5
Niechcice	gimnazjum	1	a	c	a	a	a	a	a	a	a	a	a	a	d			a	a	a	b	a	b	b	a	a	b			a	b	d	a	a	a	a	a	a	b	b	c	d	c	d	4	3	3	4	4
Niechcice	gimnazjum	1	a	c	a	a	a	a	a	a	b	a	a	a	d			a	a	a	b	a	b	b	a	a	b			a	b	d	a	a	a	a	a	a	b	b	c	d	c	d	4	3	3	4	4
Niechcice	gimnazjum	2	b	a	a	a	a	a	a	a	b	a	a	a	g			a	e	a	a	a	e	a	e	c	a	c	a	a	c	c		a	a	b	a	a	c	c	c	d	b	d	4	4	5	5	5
Niechcice	gimnazjum	2	b	a	a	a	a	a	a	a	b	a	a	a	e	a	0	a	c	b	a	a	a	a	e	e	a	a	a	c	b	c		c	a	b	a	a	c	c	c	d	b	a	4	5	4	4	5
Niechcice	gimnazjum	2	b	a	a	a	a	a	a	a	b	a	a	a	f			a	a	a	a	a	e	b	e	a	a	a	b	a	a	d	a	a	a	b	a	c	a	a	a	c	b	c	5	5	5	5	5
Niechcice	gimnazjum	2	b	a	a	a	a	a	a	a	a	c	a	a	b			a	e	a	a	a	e	a	e	f	c			c	a	b		a	a	a	a	a	c	b	c	d	b	d	1	1	1	1	1
Niechcice	gimnazjum	2	b	a	a	a	a	a	a	a	b	a	a	a	e	b	0	a	b	c	c	c	b	b	a	a	a	b,c,d	a	c	a	c		a	a	a	a	b	c	b	b	d	a	d	5	5	3	4	5
Niechcice	gimnazjum	2	a	c	a	a	a	a	a	a	b	a	a	a	e	b	0	a	b	c	c	c	b	b	a	a	a	b,c,d	a	c	a	c		a	a	a	a	b	c	b	b	d	a	d	5	5	3	4	5
Niechcice	gimnazjum	2	b	a	a	a	a	a	a	a	a	a	a	a	g			a	e	a	a	a	e	a	e	c	a	c	a	a	c	c		a	a	b	a	a	c	c	c	d	b	d	4	4	5	5	5
Niechcice	gimnazjum	2	b	a	a	a	a	a	a	a	b	a	a	a	e	a	0	a	e	b	a	a	a	a	e	e	a	a	a	c	b	c		a	a	b	a	a	c	c	c	d	b	a	4	5	4	4	5
Niechcice	gimnazjum	2	b	a	a	a	a	a	a	a	b	a	a	a	f			a	a	a	a	a	e	b	e	a	a	a	b	a	a	d	a	a	a	b	a	c	a	a	a	c	b	c	5	5	5	5	5
Niechcice	gimnazjum	2	b	a	a	a	a	a	a	a	b	a	a	a	f			a	e	a	a	a	a	a	e	e	a	c	a	a	a	c		c	a	b	a	c	c	c	b	d	b	d	5	5	3	5	5
Niechcice	gimnazjum	2	b	a	a	a	a	a	a	a	b	a	a	a	e	a	0	a	e	a	a	a	b	a	e	f	a	a,b,c,d	a	c	a	e	a	a	a	a	a	a	b	b	b	d	a	c	5	5	4	4	5
Niechcice	gimnazjum	2	b	a	a	a	a	a	a	a	b	a	a	a	e	a	0	a	a	a	a	a	b	a	e	f	a	a,b,c,d	a	c	a	e	a	a	a	a	a	a	b	b	b	d	a	c	5	5	4	4	5
Niechcice	gimnazjum	2	b	a	a	a	a	a	a	a	b	a	a	a	e	b	0	a	e	a	a	a	b	a	e	e	a	c,d	a	a	a	c		a	a	b	a	a	b	b	a	d	a	d	5	5	4	5	5
Niechcice	gimnazjum	2	a	c	a	a	a	a	a	a	a	a	a	a	d			a	e	c	b	a	e	a	f	f	a	d	a	a	c	a		a	b	a	a	a	b	b	c	d	a	d	3	4	3	2	3
Niechcice	gimnazjum	2	b	a	a	a	a	a	a	a	b	a	a	a	g			a	c	a	c	a	b	c	e	d	c			c	a	g		a	a	b	a	a	b	b	b	d	a	d	5	4	3	5	5
Niechcice	gimnazjum	2	b	a	a	a	a	a	a	a	b	a	a	a	e	b	0	a	e	c	c	c	b	a	a	c	a	a,c	a	c	a	e	a	a	a	b	a	a	b	b	b	d	a	d	5	4	4	5	5
Niechcice	gimnazjum	2	b	a	a	a	a	a	a	a	b	a	a	a	g			a	e	a	c	a	b	c	e	d	c			c	a	g		a	a	b	a	a	b	b	b	d	a	d	5	4	3	5	5
Niechcice	gimnazjum	2	b	a	a	a	a	a	a	a	b	a	a	a	e	b	0	a	e	c	c	c	b	a	a	c	a	a,c	a	c	a	e	a	a	a	b	a	a	b	b	b	d	a	d	5	4	4	5	5
Niechcice	gimnazjum	2	b	a	a	a	a	a	a	a	b	a	a	a	f			a	e	a	a	a	a	a	e	e	a	c	a	a	a	c		d	a	a	a	a	b	b	b	d	b	d	5	5	3	5	5
Niechcice	gimnazjum	3	b	a	a	a	a	a	a	a	a	b	a	a	e	b	0	a	d	a	a	a	b	c	a	a	a	a,b,c,d	b	c	c	g		a	c	b	b	b	c	b	b	c	c	c	4	3	3	4	4
Niechcice	gimnazjum	3	a	c	a	a	a	a	a	a	b	a	a	a	g			a	c	a	a	a	d	b	e	e	c			a	b	e	a	a	a	a	a	a	b	b	b	d	a	c	4	3	3	2	5
Niechcice	gimnazjum	3	b	a	a	a	a	a	a	a	b	a	a	a	e	a	0	a	e	a	a	a	b	a	e	d	a	a,c,d	a	a	a	e	a	a	b	a	b	c	c	b	b	d	b	d	5	5	4	5	5
Niechcice	gimnazjum	3	b	a	a	a	a	a	a	a	b	a	a	a	e	a	0	a	e	a	a	a	b	a	e	d	a	a,c,d	a	a	a	e	a	a	b	a	b	c	c	b	b	d	b	d	5	5	4	5	5
Niechcice	gimnazjum	3	b	a	a	a	a	a	a	a	b	a	a	a	e	b	0	a	e	a	a	a	b	a	f	f	a	a,b,d	a	a	c	c		a	a	a	a	a	c	b	b	d	b	c	4	4	3	4	5
Niechcice	gimnazjum	3	a	c	a	a	a	a	a	a	a	a	a	a	e	b	0	a	b	b	b	b	b	b	f	b	a	c,d	a	c	c	e	b	a	a	a	a	a	b	b	b	d	a	d	5	5	4	3	5
Niechcice	gimnazjum	3	b	a	a	a	a	a	a	a	b	a	a	a	e	b	0	a	b	a	a	a	b	b	f	a	a	a,b,c,d	a	b	a	e	a	c	a	a	a	a	c	c	c	d	b	d	5	5	4	5	5
Niechcice	gimnazjum	3	b	a	a	a	a	a	a	a	b	a	a	a	e	b	0	a	b	a	a	a	b	b	f	a	a	a,b,c,d	a	b	a	e	a	c	a	a	a	a	c	c	c	d	b	d	5	5	4	5	5
Niechcice	gimnazjum	3	b	a	a	a	a	a	a	a	b	a	a	a	e	b	0	a	b	a	a	a	b	b	f	a	a	a,b,c,d	a	b	a	e	a	c	a	a	a	a	c	c	c	d	b	d	5	5	4	5	5
Niechcice	gimnazjum	3	b	a	a	a	a	a	a	a	a	a	a	a	e	c	0	a	e	a	a	c	b	a	a	f	c			c	c	e	a	d	a	b	c	c	b	b	a	d	c	a	5	1	2	3	5
Niechcice	gimnazjum	2	a	e	a	a	a	a	a	a	a	b	a	a	e	b	0	a	a	a	a	a	b	b	f	a	a	a,b,c,d	b	c	a	e	b	b	d	a	d	d	c	c	c	c	c	d	3	4	2	5	3
Niechcice	gimnazjum	2	a	e	g	d	b	e	e	d	a	b	e	f	e	a	0	b	a	a	a	a	b	a	f	e	a	b,c,d	a	c	a	e	b	a	d	a	c	d	c	b	b	d	b	d	5	5	4	4	5
Niechcice	gimnazjum	2	a	d	g	e	b	e	e	e	a	b	e	d	e	b	0	c	a	c	a	a	b	b	f	a	a	b,c,d	c	c	a	e	a	a	d	a	d	d	c	b	b	c	c	c	4	4	3	4	4
Niechcice	gimnazjum	3	a	d	g	d	b	e	e	d	a	b	e	f	e	a	0	b	a	a	a	a	b	a	f	e	a	b,c,d	a	c	a	e	b	a	d	a	c	d	c	b	b	d	b	d	5	5	4	4	5
Niechcice	gimnazjum	3	a	d	g	d	b	b	e	e	a	a	b	f	e	a	0	a	e	a	a	a	b	c	f	f	a	a,b,c,d	c	a	a	e	a	c	c	a	c	d	c	b	c	d	c	c	5	5	4	5	5
Niechcice	gimnazjum	3	a	d	a	a	a	a	a	a	a	g	a	a	g			a	a	c	c	c	e	c	a	f	c			c	c	g		a	d	a	d	d	b	a	b	a	d	b	2	5	3	5	3
Niechcice	gimnazjum	3	a	d	g	c	e	c	a	a	a	g	b	g8	g			d	a	c	c	c	e	c	a	f	c			c	c	g		a	d	a	d	d	b	a	b	a	d	b	2	5	3	5	3
Niechcice	gimnazjum	3	a	e	a	a	a	a	a	a	a	a	a	a	g			a	b	a	a	c	e	c	f	f	c			c	c	g		a	b	a	c	c	b	b	c	d	b	a	5	2	5	5	5
Niechcice	gimnazjum	3	a	e	a	a	a	a	a	a	b	a	a	a	e	c	0	a	b	a	a	a	b	a	f	a	a	b,c	c	a	a	g		a	a	a	b	c	b	b	a	d	b	b	5	4	3	4	5
Niechcice	gimnazjum	3	a	c	b	b	d	g	a	a	a	c	d	f	f			a	a	c	c	a	d	b	a	a	b			b	b	f		b	c	a	c	c	c	c	c	d	b	c	5	4	3	3	4
Niechcice	gimnazjum	3	a	e	e	b	c	b	e	c	a	a	c	d	e	b	0	b	a	c	c	c	b	b	a	a	a	c,d	b	a	a	d	a	a	c	b	d	d	c	c	c	c	b	a	4	1	1	1	5
Niechcice	gimnazjum	3	a	e	a	a	a	a	a	a	a	c	a	a	f			a	a	c	c	a	d	b	a	a	b			b	b	f		b	c	a	c	c	c	c	c	d	b	c	5	4	3	3	4
Niechcice	gimnazjum	3	a	e	a	a	a	a	a	a	b	a	a	a	e	b	0	a	a	c	c	c	b	b	a	a	a	c,d	b	a	a	d	a	a	c	b	d	d	c	c	c	c	b	a	4	1	1	1	5
Niechcice	gimnazjum	3	a	e	a	a	a	a	a	a	a	c	a	a	f			a	a	c	c	a	d	b	a	a	b			b	b	f		b	c	a	c	c	c	c	c	d	b	c	5	4	3	3	4
Niechcice	gimnazjum	3	a	e	e	b	c	b	e	c	a	a	c	d	e	b	0	b	a	c	c	c	b	b	a	a	a	c,d	b	a	a	d	a	a	c	b	d	d	c	c	c	c	b	a	4	1	1	1	5
Niechcice	gimnazjum	3	a	e	a	a	a	a	a	a	b	a	a	a	e	c	0	a	a	a	a	a	a	a	d	a	a	a,b,c,d	a	b	a	e	a	a	b	a	a	c	b	b	c	d	b	b	5	3	5	5	5
Niechcice	gimnazjum	3	a	d	b	c	g	c	a	b	a	b	f	f	e	b	0		b	c	c	c	e	a	e	a	a	a,c,d	c	a	a	e	a	a	c	b	d	d	c	c	c	d	c	d	5	5	3	4	4
Niechcice	gimnazjum	3	a	d	b	b	d	e	b	b	b	a	e	f	e	c	0	a	a	a	a	a	a	a	d	a	a	a,b,c,d	a	b	a	e	a	a	b	a	a	c	b	b	c	d	b	b	5	3	5	5	5
Niechcice	gimnazjum	3	a	e	a	a	a	a	a	a	a	a	a	a	g			a	b	a	a	c	e	c	f	f	c			c	c	g		a	b	a	c	c	b	b	c	d	b	a	5	2	5	5	5
Niechcice	gimnazjum	3	a	e	b	b	b	b	e	e	a	a	b	f	e	c	0	a	b	a	a	a	b	a	f	a	a	b,c	c	a	a	g		a	a	a	b	c	b	b	a	d	b	b	5	4	3	4	5
Niechcice	gimnazjum	3	a	e	a	a	a	a	a	a	a	a	a	a	g			a	b	a	a	c	e	c	f	f	c			c	c	g		a	b	a	c	c	b	b	c	d	b	a	5	2	5	5	5
Niechcice	gimnazjum	2	a	e	a	a	a	a	a	a	a	e	a	a	e	c	0	a	b	c	c	c	e	a	f	f	a	a,b,c,d	c	c	c	g		a	c	a	d	c	c	c	b	c	c	c	5	3	4	4	4
Niechcice	gimnazjum	2	a	e	a	a	a	a	a	a	a	a	a	a	e	a	0	a	e	a	a	c	a	a	c	d	a	c,d	a	b	c	e	a	a	c	a	b	d	b	b	c	d	b	d	5	3	4	4	5
Niechcice	gimnazjum	2	a	e	a	a	a	a	a	a	a	a	a	a	e	a	0	a	e	a	a	a	b	c	f	f	a	d	c	c	c	g		d	a	a	b	b	c	b	b	d	b	d	5	5	3	4	5
Niechcice	gimnazjum	2	a	e	a	a	a	a	a	a	b	a	a	a	e	a	0	a	e	a	a	a	b	c	e	e	a	a,b	a	c	a	e	a	a	c	a	c	c	c	c	c	c	b	c	1	1	1	1	1
Niechcice	gimnazjum	2	a	e	e	c	g	b	b	c	a	a	g	f	e	c	0	a	e	a	a	a	b	c	b	f	a	d	c	c	c	g		d	a	a	b	b	c	b	b	d	b	b	5	5	3	5	5
Niechcice	gimnazjum	2	a	e	b	b	f	e	a	e	a	b	e	f	e	b	0	a	a	c	c	c	e	b	a	c	a	d	b	b	b	f		b	c	b	b	d	c	c	b	c	c	c	4	2	2	2	4
Niechcice	gimnazjum	2	a	e	a	a	a	a	a	a	a	b	a	a	e	b	0	a	a	c	c	c	e	b	a	c	a	d	b	b	b	f		b	c	b	b	d	c	c	b	c	c	c	4	2	2	2	4
Niechcice	gimnazjum	2	a	e	b	b	g	c	a	a	b	a	e	f	e	b	0	a	e	a	a	a	a,b	a	a	e	a	b	a	a	a	e	a	a	b	a	c	c	b	b	b	d	b	c	5	5	4	4	5
Niechcice	gimnazjum	2	a	e	a	a	a	a	a	a	b	a	a	a	e	b	0	a	e	c	c	c	e	a	a	a	b			b	c	c		d	a	b	a	d	c	c	c	d	b	d	4	2	3	3	4
Niechcice	gimnazjum	1	a	d	b	b	d	e	b	b	b	a	e	f	e	c	0	a	a	a	a	a	a	a	d	a	a	a,b,c,d	a	b	a	e	a	a	b	a	a	c	b	b	c	d	b	b	5	3	5	5	5
Niechcice	gimnazjum	1	a	d	a	a	a	a	a	a	a	b	a	a	e	b	0	a	b	c	c	c	e	a	e	a	a	a,c,d	c	a	a	e	a	a	c	b	d	d	c	c	c	d	c	d	5	5	3	4	4
Niechcice	gimnazjum	1	a	d	a	a	a	a	a	a	b	a	a	a	e	c	0	a	a	a	a	a	a	a	d	a	a	a,b,c,d	a	b	a	e	a	a	b	a	a	c	b	b	c	d	b	b	5	3	5	5	5
Niechcice	gimnazjum	1	a	d	b	b	d	e	b	b	b	a	e	f	e	c	0	a	a	a	a	a	a	a	d	a	a	a,b,c,d	a	b	a	e	a	a	b	a	a	c	b	b	c	d	b	b	5	3	5	5	5
Niechcice	gimnazjum	1	a	d	a	a	a	a	a	a	a	g	a	a	e	c	0	a	a	b	a	a	b	a	c	b	a	a,b,d	a	a	c	d	a	a	b	a	d	a	b	b	c	d	b	d	5	5	4	5	5
Niechcice	gimnazjum	1	a	e	a	a	a	a	a	a	a	g	a	a	e	b	0	a	e	a	a	a	a,b	a	b	a	a	b,c,d	c	c	a	e	a	a	c	a	c	d	b	b	c	d	c	d	5	5	3	5	5
Sulejów	gimnazjum	3	a	c	a	a	a	a	a	a	a	a	a	a	e	c	20	a	d	c	c	c	e	c	f	f	a	d	c	c	c	e	a	c	a	b	a	c	c	c	c	c	a	d	4	4	4	4	4
Sulejów	gimnazjum	3	b	a	a	a	a	a	a	a	a	b	a	a	e	c		a	c	c	a	a	e	c	f	f	c			c	c	g		a	b	a	b	b	b	c	b	d	b	c	4	3	3	3	3
Sulejów	gimnazjum	3	b	a	a	a	a	a	a	a	b	a	a	a	e	a		a	e	a	a	a	b	a	f	f	c			c	a	e	a	a	a	b	a	b	c	b	b	d	b	d	5	4	5	5	5
Sulejów	gimnazjum	3	b	a	a	a	a	a	a	a	a	a	a	a	c			a	e	a	a	a	b	b	e	e	b			b	b	c		a	a	a	a	c	c	c	b	d	a	d	5	4	2	5	5
Sulejów	gimnazjum	3	b	a	a	a	a	a	a	a	b	a	a	a	e	a		a	e	a	a	a	b	a	f	c	a	a,c,d	a	a	a	e	a	a	a	a	a	a	b	b	c	d	b	d	5	5	5	5	5
Sulejów	gimnazjum	3	b	a	a	a	a	a	a	a	b	a	a	a	e	a		a	e	a	a	a	b	a	f	f	c			c	a	e	a	a	a	b	a	b	c	b	b	d	b	d	5	4	5	5	5
Sulejów	gimnazjum	3	b	a	a	a	a	a	a	a	a	a	a	a	e	c		a	e	a	a	c	b	a	a	f	c			c	c	e	a	d	a	b	c	c	b	b	a	d	c	a	5	1	2	3	5
Sulejów	gimnazjum	3	b	a	a	a	a	a	a	a	b	a	a	a	c			a	e	a	c	a	b	a	a	f	a	c,d	c	a	a	c		a	a	a	a	b	c	c	a	d	a	c	5	4	2	4	5
Sulejów	gimnazjum	3	b	a	a	a	a	a	a	a	b	a	a	a	e	a		a	e	a	a	a	b	a	e	f	a	a,c,d	a	a	a	e	a	a	a	b	a	a	c	b	a	d	b	c	5	4	4	4	5
Sulejów	gimnazjum	3	b	a	a	a	a	a	a	a	b	a	a	a	c			a	e	a	a	a	b	a	e	d	a	a,b,c,d	a	a	a	c		a	a	a	a	a	b	b	c	d	a	d	5	5	5	5	5
Sulejów	gimnazjum	3	b	a	a	a	a	a	a	a	a	b	a	a	d			a	b	a	c	b	b	a	f	b	b			b	b	c		a	c	b	c	c	c	c	b	c	b	c	4	4	2	5	5
Sulejów	gimnazjum	3	a	c	a	a	a	a	a	a	b	a	a	a	d			a	b	a	c	c	b	a	f	b	b			c	a	c		a	b	b	c	c	c	b	c	d	b	c	5	4	4	5	4
Sulejów	gimnazjum	3	a	c	a	a	a	a	a	a	b	a	a	a	b			a	c	a	b	c	b	a	a	b	b			a	c	b		d	a	a	a	b	a	b	c	b	b	d	5	5	5	5	5
Sulejów	gimnazjum	3	b	a	a	a	a	a	a	a	b	a	a	a	e	a		a	e	a	a	a	b	a	e	d	a	a,c,d	a	a	a	e	a	a	b	a	b	c	c	b	b	d	b	d	5	5	4	5	5
Sulejów	gimnazjum	3	b	a	a	a	a	a	a	a	b	a	a	a	e	a		a	e	a	a	a	b	a	e	d	a	a,c,d	a	a	a	e	a	a	b	a	b	c	c	b	b	d	b	d	5	5	4	5	5
Sulejów	gimnazjum	3	b	a	a	a	a	a	a	a	a	a	a	a	g			a	e	c	c	c	e	a	f	f	c			c	a	g		a	a	a	a	a	b	b	c	d	a	d	5	3	3	4	5
Sulejów	gimnazjum	3	b	a	a	a	a	a	a	a	b	a	a	a	e	b	18	a	e	a	a	a	b	b	f	a	a	d	b	b	a	c		a	a	b	a	a	b	b	c	d	a	d	4	4	4	4	4
Sulejów	gimnazjum	3	b	a	a	a	a	a	a	a	b	a	a	a	e	c		a	e	a	a	a	a	a	d	d	a	c	c	a	a	d	a	b	a	a	a	a	b	b	c	d	a	d	5	5	4	5	5
Sulejów	gimnazjum	2	b	a	a	a	a	a	a	a	b	a	a	a	e	a		a	e	a	a	a	b	a	e	f	a	a,b,c,d	a	c	a	e	a	a	a	a	a	a	b	b	b	d	a	c	5	5	4	4	5
Sulejów	gimnazjum	2	b	a	a	a	a	a	a	a	b	a	a	a	e	a		a	a	a	a	a	b	a	e	f	a	a,b,c,d	a	c	a	e	a	a	a	a	a	a	b	b	b	d	a	c	5	5	4	4	5
Sulejów	gimnazjum	2	b	a	a	a	a	a	a	a	b	a	a	a	e	b		a	e	a	a	a	b	a	e	e	a	c,d	a	a	a	c		a	a	b	a	a	b	b	a	d	a	d	5	5	4	5	5
Sulejów	gimnazjum	2	b	a	a	a	a	a	a	a	b	a	a	a	d			a	e	c	b	a	e	a	f	f	a	d	a	a	c	a		a	b	a	a	a	b	b	c	d	a	d	3	4	3	2	3
Sulejów	gimnazjum	2	a	c	a	a	a	a	a	a	a	a	a	a	a			a	e	b	a	b	d	c	c	c	a	b	a	b	a	d	c	b	b	b	c	d	b	c	b	a	a	b	2	3	1	4	3
Sulejów	gimnazjum	2	b	a	a	a	a	a	a	a	a	a	a	a	e	a		a	e	a	a	a	a	a	e	e	a	c	a	a	a	c		c	a	a	a	a	b	b	b	d	b	d	5	5	3	5	5
Sulejów	gimnazjum	2	b	a	a	a	a	a	a	a	a	a	a	a	e	a		a	e	a	a	a	b	a	e	f	a	a,b,c,d	a	c	a	e	a	a	a	a	a	a	b	b	b	d	a	c	5	5	4	4	5
Sulejów	gimnazjum	2	b	a	a	a	a	a	a	a	a	a	a	a	e	a		a	a	a	a	a	b	a	e	f	a	a,b,c,d	a	c	a	e	a	a	a	a	a	a	b	b	b	d	a	c	5	5	4	4	5
Sulejów	gimnazjum	2	b	a	a	a	a	a	a	a	a	a	a	a	e	b		a	e	a	a	a	b	a	e	e	a	c,d	a	a	a	c		a	a	b	a	a	b	b	a	d	a	d	5	5	4	5	5
Sulejów	gimnazjum	2	b	a	a	a	a	a	a	a	a	a	a	a	d			a	e	c	b	a	e	a	f	f	a	d	a	a	c	a		a	b	a	a	a	b	b	c	d	a	d	3	4	3	2	3
Sulejów	gimnazjum	2	b	a	a	a	a	a	a	a	a	a	a	a	e	b		a	b	c	c	c	e	a	f	a	b			c	c	d	a	c	a	a	a	b	b	b	b	d	c	d	5	4	3	5	5
Sulejów	gimnazjum	2	a	c	a	a	a	a	a	a	b	a	a	a	e	b		a	c	c	c	a	b	a	f	b	c			c	c	c		c	b	a	a	c	b	b	b	d	a	d	5	5	4	4	5
Sulejów	gimnazjum	2	b	a	a	a	a	a	a	a	a	a	a	a	d			a	e	a	c	c	e	a	f	f	c			c	c	c		c	a	a	a	b	c	c	c	d	a	d	5	5	4	4	5
Sulejów	gimnazjum	2	b	a	a	a	a	a	a	a	a	a	a	a	e	b		a	e	c	c	c	e	c	e	a	a	a,b,c	a	c	c	c		c	a	a	a	a	c	c	c	d	a	c	5	4	3	4	5
Sulejów	gimnazjum	2	a	c	a	a	a	a	a	a	a	a	a	a	e	a		a	e	a	a	a	a	a	e	e	a	c	a	a	a	c		c	a	a	a	a	b	b	b	d	b	d	5	5	3	5	5
Sulejów	gimnazjum	2	b	a	a	a	a	a	a	a	a	a	a	a	e	a		a	a	a	a	a	e	b	e	a	a	a	b	a	a	d	a	a	a	b	a	c	a	a	a	c	b	c	5	5	5	5	5
Sulejów	gimnazjum	2	b	a	a	a	a	a	a	a	a	a	a	a	b			a	e	a	a	a	e	a	e	f	c			c	a	b		a	a	a	a	a	c	b	c	d	b	d	1	1	1	1	1
Sulejów	gimnazjum	2	b	a	a	a	a	a	a	a	a	a	a	a	g			a	e	a	a	a	e	a	e	c	a	c	a	a	c	c		a	a	b	a	a	c	c	c	d	b	d	4	4	5	5	5
Sulejów	gimnazjum	2	b	a	a	a	a	a	a	a	a	a	a	a	e	a		a	e	b	a	a	a	a	e	e	a	a	a	c	b	c		c	a	b	a	a	c	c	c	d	b	a	4	5	4	4	5
Sulejów	gimnazjum	2	b	a	a	a	a	a	a	a	a	a	a	a	e	a		a	a	a	a	a	e	b	e	a	a	a	b	a	a	d	a	a	a	b	a	c	a	a	a	c	b	c	5	5	5	5	5
Sulejów	gimnazjum	2	b	a	a	a	a	a	a	a	a	a	a	a	b			a	e	a	a	a	e	a	e	f	c			c	a	b		a	a	a	a	a	c	b	c	d	b	d	1	1	1	1	1
Sulejów	gimnazjum	2	b	a	a	a	a	a	a	a	a	a	a	a	e	c		a	e	c	c	c	e	a	e	a	a	a,b,c,d	a	c	a	c		a	a	a	a	b	c	b	b	a	b	b	4	3	3	4	5
Sulejów	gimnazjum	2	b	a	a	a	a	a	a	a	a	a	a	a	c			a	b	a	a	a	a	a	f	a	a	c,d	a	c	a	a		a	b	b	a	b	c	b	b	d	b	d	5	4	3	5	5
Sulejów	gimnazjum	2	b	a	a	a	a	a	a	a	a	a	a	a	g			a	e	c	c	c	e	a	e	a	a	a,b,c,d	b	c	b	c		a	a	b	b	b	c	b	b	d	b	d	5	4	3	5	5
Sulejów	gimnazjum	2	b	a	a	a	a	a	a	a	a	a	a	a	e	b		a	b	c	c	c	b	b	a	a	a	b,c,d	a	c	a	c		a	a	a	a	b	c	b	b	d	a	d	5	5	3	4	5
Sulejów	gimnazjum	2	b	a	a	a	a	a	a	a	a	a	a	a	e	a		a	a	a	a	a	e	b	e	a	a	a	b	a	a	d	a	a	a	b	a	c	a	a	a	c	b	c	5	5	5	5	5
Sulejów	gimnazjum	2	b	a	a	a	a	a	a	a	a	a	a	a	b			a	e	a	a	a	e	a	e	f	c			c	a	b		a	a	a	a	a	c	b	c	d	b	d	1	1	1	1	1
Sulejów	gimnazjum	2	b	a	a	a	a	a	a	a	a	a	a	a	g			a	e	a	a	a	e	a	e	c	a	c	a	a	c	c		a	a	b	a	a	c	c	c	d	b	d	4	4	5	5	5
Sulejów	gimnazjum	2	b	a	a	a	a	a	a	a	a	a	a	a	e	a		a	e	b	a	a	a	a	e	e	a	a	a	c	b	c		c	a	b	a	a	c	c	c	d	b	a	4	5	4	4	5
Sulejów	gimnazjum	2	b	a	a	a	a	a	a	a	a	a	a	a	e	a		a	a	a	a	a	e	b	e	a	a	a	b	a	a	d	a	a	a	b	a	c	a	a	a	c	b	c	5	5	5	5	5
Sulejów	gimnazjum	2	b	a	a	a	a	a	a	a	a	a	a	a	b			a	e	a	a	a	e	a	e	f	c			c	a	b		a	a	a	a	a	c	b	c	d	b	d	1	1	1	1	1
Sulejów	gimnazjum	2	b	a	a	a	a	a	a	a	a	a	a	a	e	c		a	e	c	c	c	e	a	e	a	a	a,b,c,d	a	c	a	c		a	a	a	a	b	c	b	b	a	b	b	4	3	3	4	5
Sulejów	gimnazjum	2	b	a	a	a	a	a	a	a	a	a	a	a	c			a	b	a	a	a	a	a	f	a	a	c,d	a	c	a	a		a	b	b	a	b	c	b	b	d	b	d	5	4	3	5	5
Sulejów	gimnazjum	2	b	a	a	a	a	a	a	a	a	a	a	a	g			a	e	c	c	c	e	a	e	a	a	a,b,c,d	b	c	b	c		a	a	b	b	b	c	b	b	d	b	d	5	4	3	5	5
Sulejów	gimnazjum	2	b	a	a	a	a	a	a	a	a	a	a	a	e	b		a	b	c	c	c	b	b	a	a	a	b,c,d	a	c	a	c		a	a	a	a	b	c	b	b	d	a	d	5	5	3	4	5
Sulejów	gimnazjum	1	b	a	a	a	a	a	a	a	a	a	a	a	e	c		a	e	a	c	c	e	c	e	f	a	a,b,c	a	a	c	e	a	c	a	a	a	c	c	c	c	d	b	d	5	4	3	4	4
Sulejów	gimnazjum	1	a	c	a	a	a	a	a	a	b	a	a	a	e	a	5	a	c	a	a	a	b	a	b	b	a	b,c,d	a	a	c	g		c	a	b	a	b	c	c	a	d	b	d	5	5	5	5	5
Sulejów	gimnazjum	1	a	c	a	a	a	a	a	a	a	a	a	a	d			a	a	a	b	a	b	b	a	a	b			a	b	d	a	a	a	a	a	a	b	b	c	d	c	d	4	3	3	4	4
Sulejów	gimnazjum	1	a	c	a	a	a	a	a	a	a	a	a	a	d			a	a	a	b	a	b	b	a	a	b			a	b	d	a	a	a	a	a	a	b	b	c	d	c	d	4	3	3	4	4
Sulejów	gimnazjum	1	b	a	a	a	a	a	a	a	a	a	a	a	e	c		a	e	a	c	c	e	c	e	f	a	a,b,c	a	a	c	e	a	c	a	a	a	c	c	c	c	d	b	d	5	4	3	4	4
Sulejów	gimnazjum	1	a	c	a	a	a	a	a	a	a	a	a	a	g			a	a	c	c	c	e	c	a	f	c			c	c	g		a	d	a	d	d	b	a	b	a	d	b	2	5	3	5	3
Sulejów	gimnazjum	1	b	a	a	a	a	a	a	a	a	a	a	a	e	a	5	a	c	a	a	a	b	a	b	b	a	b,c,d	a	a	c	g		c	a	a	a	b	c	c	a	d	b	d	5	5	5	5	5
Sulejów	gimnazjum	1	b	a	a	a	a	a	a	a	a	a	a	a	e	c		a	e	a	c	c	e	c	e	f	a	a,b,c	a	a	c	e	a	c	a	a	a	c	c	c	c	d	b	d	5	4	3	4	4
Sulejów	gimnazjum	1	b	a	a	a	a	a	a	a	a	a	a	a	e	c		a	e	a	c	c	e	c	e	f	a	a,b,c	a	a	c	e	a	c	a	a	a	c	c	c	c	d	b	d	5	4	3	4	4
Sulejów	gimnazjum	1	a	c	a	a	a	a	a	a	a	a	a	a	g			a	a	c	c	c	e	c	a	f	c			c	c	g		a	d	a	d	d	b	a	b	a	d	b	2	5	3	5	3
Sulejów	gimnazjum	1	a	c	a	a	a	a	a	a	a	a	a	a	g			a	a	c	c	c	e	c	a	f	c			c	c	g		a	d	a	d	d	b	a	b	a	d	b	2	5	3	5	3
Sulejów	gimnazjum	1	b	a	a	a	a	a	a	a	a	a	a	a	e	b	0	a	b	a	a	a	b	b	f	a	a	a,b,c,d	a	b	a	e	a	c	a	a	a	a	c	c	c	d	b	d	5	5	4	5	5
Sulejów	gimnazjum	1	a	c	a	a	a	a	a	a	a	a	a	a	a			a	e	b	a	b	d	c	c	c	a	b	a	b	a	d	c	b	a	a	c	d	b	c	b	a	a	b	2	3	1	4	3
Sulejów	gimnazjum	1	b	a	a	a	a	a	a	a	a	a	a	a	g			a	e	a	c	a	b	c	e	d	c			c	a	g		a	a	b	a	a	b	b	b	d	a	d	5	4	3	5	5
Sulejów	gimnazjum	1	b	a	a	a	a	a	a	a	a	a	a	a	e	b		a	e	c	c	c	b	a	a	c	a	a,c	a	c	a	e	a	a	a	b	a	a	b	b	b	d	a	d	5	4	4	5	5
Sulejów	gimnazjum	1	b	a	a	a	a	a	a	a	a	a	a	a	e	b	0	a	b	a	a	a	b	b	f	a	a	a,b,c,d	a	b	a	e	a	c	a	a	a	a	c	c	c	d	b	d	5	5	4	5	5
Sulejów	gimnazjum	1	a	c	a	a	a	a	a	a	b	a	a	a	a			a	e	b	a	b	d	c	c	c	a	b	a	b	a	d	c	b	b	b	c	d	b	c	b	a	a	b	2	3	1	4	3
Sulejów	gimnazjum	1	b	a	a	a	a	a	a	a	a	a	a	a	g			a	e	a	c	a	b	c	e	d	c			c	a	g		a	a	b	a	a	b	b	b	d	a	d	5	4	3	5	5
Sulejów	gimnazjum	1	b	a	a	a	a	a	a	a	a	a	a	a	e	b		a	e	c	c	c	b	a	a	c	a	a,c	a	c	a	e	a	a	a	b	a	a	b	b	b	d	a	d	5	4	4	5	5
Sulejów	gimnazjum	1	b	a	a	a	a	a	a	a	a	a	a	a	e	b	0	a	b	a	a	a	b	b	f	a	a	a,b,c,d	a	b	a	e	a	c	a	a	a	a	c	c	c	d	b	d	5	5	4	5	5
Sulejów	gimnazjum	1	a	c	a	a	a	a	a	a	a	a	a	a	a			a	e	b	a	b	d	c	c	c	a	b	a	b	a	d	c	b	a	a	c	d	b	c	b	a	a	b	2	3	1	4	3
Sulejów	gimnazjum	1	b	a	a	a	a	a	a	a	b	a	a	a	g			a	e	a	c	a	b	c	e	d	c			c	a	g		a	a	b	a	a	b	b	b	d	a	d	5	4	3	5	5
Sulejów	gimnazjum	1	b	a	a	a	a	a	a	a	b	a	a	a	e	b		a	e	c	c	c	b	a	a	c	a	a,c	a	c	a	e	a	a	a	b	a	a	b	b	b	d	a	d	5	4	4	5	5
Sulejów	gimnazjum	1	b	a	a	a	a	a	a	a	b	a	a	a	e	b	0	a	b	a	a	a	b	b	f	a	a	a,b,c,d	a	b	a	e	a	c	c	a	a	a	c	c	c	d	b	d	5	5	4	5	5
Sulejów	gimnazjum	1	b	a	a	a	a	a	a	a	a	a	a	a	g			a	e	a	c	a	b	c	e	d	c			c	a	g		a	a	b	a	a	b	b	b	d	a	d	5	4	3	5	5
Sulejów	gimnazjum	1	b	a	a	a	a	a	a	a	b	a	a	a	e	b		a	e	c	c	c	b	a	a	c	a	a,c	a	c	a	e	a	a	a	b	a	a	b	b	b	d	a	d	5	4	4	5	5
Sulejów	gimnazjum	3	a	d	g	e	e	c	a	a	a	g	b	g8	g			d	a	c	c	c	e	c	a	f	c			c	c	g		a	d	a	d	d	b	a	b	a	d	b	2	5	3	5	3
Sulejów	gimnazjum	3	a	d	a	a	a	a	a	a	a	g	a	a	g			a	a	c	c	c	e	c	a	f	c			c	c	g		a	d	a	d	d	b	a	b	a	d	b	2	5	3	5	3
Sulejów	gimnazjum	3	a	d	a	a	a	a	a	a	a	g	a	a	g			a	a	c	c	c	e	c	a	f	c			c	c	g		a	d	a	d	d	b	a	b	a	d	b	2	5	3	5	3
Sulejów	gimnazjum	3	a	d	a	a	a	a	a	a	a	b	a	a	c			a	a	a	a	a	a	a	e	a	a	e1	b	a	a	e	a	c	c	d	a	d	c	c	c	d	c	c	5	2	5	2	5
Sulejów	gimnazjum	3	a	d	a	a	a	a	a	a	b	a	a	a	e	c		a	e	c	c	c	b,c	c	b	f	a	b	c	c	c	g		b	d	a	d	d	c	b	c	d	c	c	4	3	3	5	5
Sulejów	gimnazjum	3	a	d	a	a	a	a	a	a	a	b	a	a	e	a		a	a	a	a	a	b	a	f	e	a	b,c,d	a	c	a	e	b	a	d	a	c	d	c	b	b	d	b	d	5	5	4	4	5
Sulejów	gimnazjum	3	a	d	g	d	b	b	e	e	a	a	b	f	e	a		a	e	a	a	a	b	c	f	f	a	a,b,c,d	c	a	a	e	a	c	c	a	c	d	c	b	c	d	c	c	5	5	4	5	5
Sulejów	gimnazjum	3	a	d	a	a	a	a	a	a	a	b	a	a	e	a		a	a	a	a	a	b	a	f	e	a	b,c,d	a	c	a	e	b	a	d	a	c	d	c	b	b	d	b	d	5	5	4	4	5
Sulejów	gimnazjum	3	a	d	a	a	a	a	a	a	a	g	a	a	e	a	15	a	b	a	a	a	a	a	a	b	a	b,c	a	a	a	e	a	c	a	a	b	b	b	b	b	d	c	d	5	5	5	5	5
Sulejów	gimnazjum	2	a	d	g	e	b	e	e	e	a	b	e	d	e	b		c	a	c	a	a	b	b	f	a	a	b,c,d	c	c	a	e	a	a	d	a	d	d	c	b	b	c	c	c	4	4	3	4	4
Sulejów	gimnazjum	2	a	d	a	a	a	a	a	a	a	a	a	a	g			a	a	a	a	a	b	b	a	a	a	b	c	b	a	c		b	c	b	d	c	c	c	c	b	c	d	3	4	4	4	3
Sulejów	gimnazjum	2	a	d	g	d	b	e	e	d	b	a	f	d	e	c		b		c	c	c	b,c	c	b	f	a	b	c	c	c	g		b	d	a	d	d	c	b	c	d	c	c	4	3	3	5	5
Sulejów	gimnazjum	2	a	d	g	d	b	e	e	d	b	a	f	d	e	c		b		c	c	c	b,c	c	b	f	a	b	c	c	c	g		b	d	a	d	d	c	b	c	d	c	c	4	3	3	5	5
Sulejów	gimnazjum	2	a	d	a	a	a	a	a	a	a	b	a	a	e	a		a	a	a	a	a	b	a	f	e	a	b,c,d	a	c	a	e	b	a	d	a	c	d	c	b	b	d	b	d	5	5	4	4	5
Sulejów	gimnazjum	2	a	d	g	e	e	c	a	a	a	g	b	g8	g			d	a	c	c	c	e	c	a	f	c			c	c	g		a	d	a	d	d	b	a	b	a	d	b	2	5	3	5	3
Sulejów	gimnazjum	2	a	d	g	e	e	c	a	a	a	g	b	g8	g			d	a	c	c	c	e	c	a	f	c			c	c	g		a	d	a	d	d	b	a	b	a	d	b	2	5	3	5	3
Sulejów	gimnazjum	2	a	d	a	a	a	a	a	a	a	b	a	a	c			a	a	a	a	a	a	a	e	a	a	e1	b	a	a	e	a	c	c	d	a	d	c	c	c	d	c	c	5	2	5	2	5
Sulejów	gimnazjum	1	a	c	g	e	e	c	a	a	a	g	b	g8	g			d	a	c	c	c	e	c	a	f	c			c	c	g		a	d	a	d	d	b	a	b	a	d	b	2	5	3	5	3
Sulejów	gimnazjum	3	a	e	b	b	b	b	e	e	b	a	b	f	e	c		a	b	a	a	a	b	a	f	a	a	b,c	c	a	a	g		a	a	a	b	c	b	b	a	d	b	b	5	4	3	4	5
Sulejów	gimnazjum	3	a	e	a	a	a	a	a	a	a	b	a	a	e	c	18	a	d	a	a	c	b	a	f	a	b			b	a	c		a	c	a	c	c	b	b	c	c	c	d	3	3	1	2	5
Sulejów	gimnazjum	3	a	e	b	b	b	b	e	e	a	a	b	f	g			a	b	a	a	c	e	c	f	f	c			c	c	g		a	b	a	c	c	b	b	c	d	b	a	5	2	5	5	5
Sulejów	gimnazjum	3	a	e	a	a	a	a	a	a	a	a	a	a	e	c		a	b	a	a	a	b	a	f	a	a	b,c	c	a	a	g		a	a	a	b	c	b	b	a	d	b	b	5	4	3	4	5
Sulejów	gimnazjum	3	a	e	a	a	a	a	a	a	a	b	a	a	f			a	b	b	a	b	a	c	e	e	a	e	b	a	c	a		d	a	a	c	d	c	a	a	c	a	a	3	4	2	2	1
Sulejów	gimnazjum	3	a	e	b	b	b	h15	c	c	a	e	f	e	g			b	d	c	c	c	e	b	a	a	a	a,c	b	c	c	g		b	c	b	d	b	a	a	b	b	c	c	3	3	3	3	3
Sulejów	gimnazjum	3	a	e	a	a	a	a	a	a	a	b	a	a	f			a	b	b	a	b	a	c	e	e	a	e	b	a	c	a		d	a	a	c	d	c	a	a	c	a	a	3	4	2	2	1
Sulejów	gimnazjum	3	a	e	a	a	a	a	a	a	a	e	a	a	g			a	d	c	c	c	e	b	a	a	a	a,c	b	c	c	g		b	c	b	d	b	a	a	b	b	c	c	3	3	3	3	3
Sulejów	gimnazjum	3	a	e	a	a	a	a	a	a	a	b	a	a	f			a	b	b	a	b	a	c	e	e	a	e	b	a	c	a		d	a	a	c	d	c	a	a	c	a	a	3	4	2	2	1
Sulejów	gimnazjum	3	a	e	a	a	a	a	a	a	a	e	a	a	g			a	d	c	c	c	e	b	a	a	a	a,c	b	c	c	g		b	c	b	d	b	a	a	b	b	c	c	3	3	3	3	3
Sulejów	gimnazjum	3	a	e	c	c	b	c	b	b	a	b	d	c	f			b	b	b	a	b	a	c	e	e	a	e	b	a	c	a		e	a	a	c	d	c	a	a	c	a	a	3	4	2	2	1
Sulejów	gimnazjum	3	a	e	b	b	b	h15	c	c	a	e	f	e	g			b	d	c	c	c	e	b	a	a	a	a,c	b	c	c	g		b	c	b	d	b	a	a	b	b	c	c	3	3	3	3	3
Sulejów	gimnazjum	3	a	e	a	a	a	a	a	a	a	g	a	a	e	c		a	a	b	a	a	b	a	c	b	a	a,b,d	a	a	c	d	a	a	b	a	d	a	b	b	c	d	b	d	5	5	4	5	5
Sulejów	gimnazjum	3	a	e	a	a	a	a	a	a	a	g	a	a	e	b		a	e	a	a	a	a,b	a	b	a	a	b,c,d	c	c	a	e	a	a	c	a	c	d	b	b	c	d	c	d	5	5	3	5	5
Sulejów	gimnazjum	3	a	d	a	a	a	a	a	a	a	b	a	a	e	a		a	a	a	a	a	b	b	f	a	a	c	c	a	c	e	a	a	c	a	c	c	c	c	b	d	b	d	5	5	5	5	5
Sulejów	gimnazjum	3	a	d	a	a	a	a	a	a	b	a	a	a	e	c		a	e	a	a	a	b	a	f	f	a	a,b,c,d	c	c	a	e	a	c	a	a	a	c	c	c	b	c	b	c	4	4	3	4	4
Sulejów	gimnazjum	3	a	e	a	a	a	a	a	a	a	g	a	a	e	c		a	a	b	a	a	b	a	c	b	a	a,b,d	a	a	c	d	a	a	b	a	d	a	b	b	c	d	b	d	5	5	4	5	5
Sulejów	gimnazjum	3	a	d	a	a	a	a	a	a	a	g	a	a	e	b		a	e	a	a	a	a,b	a	b	a	a	b,c,d	c	c	a	e	a	a	c	a	c	d	b	b	c	d	c	d	5	5	3	5	5
Sulejów	gimnazjum	3	a	d	a	a	a	a	a	a	a	g	a	a	e	c		a	a	b	a	a	b	a	c	b	a	a,b,d	a	a	c	d	a	a	b	a	d	a	b	b	c	d	b	d	5	5	4	5	5
Sulejów	gimnazjum	3	a	d	c	c	b	b	b	b	a	g	e	f	e	b		a	e	a	a	a	a,b	a	b	a	a	b,c,d	c	c	a	e	a	a	c	a	c	d	b	b	c	d	c	d	5	5	3	5	5
Sulejów	gimnazjum	3	a	d	e	c	d	b	b	b	a	e	g	f	e	c			b	c	c	c	e	a	f	f	a	a,b,c,d	c	c	c	g		g	c	a	d	c	c	c	b	c	c	c	5	3	4	4	4
Sulejów	gimnazjum	3	a	e	b	b	d	e	b	b	b	a	e	f	e	c	10	a	a	a	a	a	a	a	d	a	a	a,b,c,d	a	b	a	e	a	a	b	a	a	c	b	b	c	d	b	b	5	3	5	5	5
Sulejów	gimnazjum	3	a	d	a	a	a	a	a	a	a	b	a	a	e	b		a	b	c	c	c	e	a	e	a	a	a,c,d	c	a	a	e	a	a	c	b	d	d	c	c	c	d	c	d	5	5	3	4	4
Sulejów	gimnazjum	3	a	d	b	b	d	e	b	b	b	a	e	f	e	c	10	a	a	a	a	a	a	a	d	a	a	a,b,c,d	a	b	a	e	a	a	b	a	a	c	b	b	c	d	b	b	5	3	5	5	5
Sulejów	gimnazjum	3	a	d	a	a	a	a	a	a	b	a	a	a	e	c	10	a	a	a	a	a	a	a	d	a	a	a,b,c,d	a	b	a	e	a	a	b	a	a	c	b	b	c	d	b	b	5	3	5	5	5
Sulejów	gimnazjum	3	a	d	a	a	a	a	a	a	b	a	a	a	e	c	10	a	a	a	a	a	a	a	d	a	a	a,b,c,d	a	b	a	e	a	a	b	a	a	c	b	b	c	d	b	b	5	3	5	5	5
Sulejów	gimnazjum	3	a	d	a	a	a	a	a	a	a	a	a	a	e	b	10	a	b	a	a	a	a	a	c	a	a	a,b,c,d	a	b	a	e	a	c	a	b	a	d	c	c	a	d	c	d	5	4	2	5	5
Sulejów	gimnazjum	3	a	d	b	c	b	e	b	d	a	a	e	d	c			b	a	a	a	a	a	a	f	a	a	a,b	a	a	a	c		c	c	a	c	d	b	b	c	c	c	c	4	5	3	3	4
Sulejów	gimnazjum	3	a	d	e	c	b	e	e	d	a	a	f	d	e	b	10	b	b	a	a	a	a	a	c	a	a	a,b,c,d	a	b	a	e	a	c	c	b	d	d	c	c	a	d	c	d	5	4	2	5	5
Sulejów	gimnazjum	3	a	d	b	c	b	e	b	d	a	a	e	d	c			b	a	a	a	a	a	a	f	a	a	a,b	a	a	a	c		c	c	a	c	d	b	b	c	c	c	c	4	5	3	3	4
Sulejów	gimnazjum	3	a	e	e	c	b	e	e	d	a	a	f	d	e	b	10	b	b	a	a	a	a	a	c	a	a	a,b,c,d	a	b	a	e	a	c	c	b	d	d	c	c	a	d	c	d	5	4	2	5	5
Sulejów	gimnazjum	3	a	d	b	b	f	e	a	e	a	b	e	f	e	b		a	a	c	c	c	e	b	a	c	a	d	b	b	b	f		b	c	b	b	d	c	c	b	c	c	c	4	2	2	2	4
Sulejów	gimnazjum	2	a	d	a	a	a	a	a	a	a	g	a	a	e	c		a	a	b	a	a	b	a	c	b	a	a,b,d	a	a	c	d	a	a	b	a	d	a	b	b	c	d	b	d	5	5	4	5	5
Sulejów	gimnazjum	2	a	e	a	a	a	a	a	a	a	g	a	a	e	b		a	e	a	a	a	a,b	a	b	a	a	b,c,d	c	c	a	e	a	a	c	a	c	d	b	b	c	d	c	d	5	5	3	5	5
Sulejów	gimnazjum	2	a	b	a	a	a	a	a	a	a	b	a	a	e	a		a	a	a	a	a	b	b	f	a	a	c	c	a	c	e	a	a	c	a	c	c	c	c	b	d	b	d	5	5	5	5	5
Sulejów	gimnazjum	2	a	d	a	a	a	a	a	a	b	a	a	a	e	c		a	e	a	a	a	b	a	f	f	a	a,b,c,d	c	c	a	e	a	c	a	a	a	c	c	c	b	c	b	c	4	4	3	4	4
Sulejów	gimnazjum	2	a	d	b	b	b	b	b	b	a	g	c	f	e	c		a	a	b	a	a	b	a	c	b	a	a,b,d	a	a	c	d	a	a	b	a	d	a	b	b	c	d	b	d	5	5	4	5	5
Sulejów	gimnazjum	2	a	e	a	a	a	a	a	a	a	g	a	a	e	b		a	e	a	a	a	a,b	a	b	a	a	b,c,d	c	c	a	e	a	a	c	a	c	d	b	b	c	d	c	d	5	5	3	5	5
Sulejów	gimnazjum	2	a	e	b	b	b	b	b	b	a	g	c	f	e	c		a	a	b	a	a	b	a	c	b	a	a,b,d	a	a	c	d	a	a	b	a	d	a	b	b	c	d	b	d	5	5	4	5	5
Sulejów	gimnazjum	2	a	e	a	a	a	a	a	a	a	g	a	a	e	b		a	e	a	a	a	a,b	a	b	a	a	b,c,d	c	c	a	e	a	a	c	a	c	d	b	b	c	d	c	d	5	5	3	5	5
Sulejów	gimnazjum	2	a	e	e	c	d	b	b	b	a	e	g	f	e	c			b	c	c	c	e	a	f	f	a	a,b,c,d	c	c	c	g		g	c	a	d	c	c	c	b	c	c	c	5	3	4	4	4
Sulejów	gimnazjum	2	a	e	a	a	a	a	a	a	a	a	a	a	e	a	16	a	e	a	a	c	a	a	c	d	a	c,d	a	b	c	e	a	a	c	a	b	d	b	b	c	d	b	d	5	3	4	4	5
Sulejów	gimnazjum	2	a	e	b	b	f	b	a	b	a	a	e	f	e	a	10	a	e	a	a	a	b	c	f	f	a	d	c	c	c	g		d	a	a	b	b	c	b	b	d	b	d	5	5	3	4	5
Sulejów	gimnazjum	2	a	e	a	a	a	a	a	a	b	a	a	a	e	a	5	a	e	a	a	a	b	c	e	e	a	a,b	a	c	a	e	a	a	c	a	c	c	c	c	c	c	b	c	1	1	1	1	1
Sulejów	gimnazjum	2	a	e	a	a	a	a	a	a	a	a	a	a	e	c		a	e	a	a	a	b	c	b	f	a	d	c	c	c	g		d	a	a	b	b	c	b	b	d	b	b	5	5	3	5	5
Sulejów	gimnazjum	2	a	e	b	b	d	g	a	b	a	c	e	f	e	a		a	e	a	a	a	b	b	a	e	c			a	c	g		b	b	b	c	c	c	b	b	d	b	d	5	5	3	4	5
Sulejów	gimnazjum	2	a	e	c	b	b	b	e	b	a	b	b	f	d			b	a	a	b	b	b	a	b	a	c			b	a	a		b	a	a	c	a	c	a	c	c	b	c	3	4	3	1	3
Sulejów	gimnazjum	2	a	e	c	c	c	g	e	c	a	d	f	f	e	c		b	e	a	a	a	b	a	e	c	a	b,c,d	c	a	a	e	a	c	c	a	c	c	c	c	b	d	b	c	5	5	5	4	5
Sulejów	gimnazjum	2	a	e	a	a	a	a	a	a	a	b	a	a	e	b		a	a	a	c	a	e	c	f	b	a	b,c	a	a	c	d	a	b	d	b	d	d	c	c	c	c	c	c	3	4	2	3	5
Sulejów	gimnazjum	2	a	d	a	a	a	a	a	a	a	a	a	a	e	b	10	a	b	a	a	a	a	a	c	a	a	a,b,c,d	a	b	a	e	a	c	a	b	a	d	c	c	a	d	c	d	5	4	2	5	5
Sulejów	gimnazjum	2	a	e	b	c	b	e	b	d	a	a	e	d	c			b	a	a	a	a	a	a	f	a	a	a,b	a	a	a	c		c	c	a	c	d	b	b	c	c	c	c	4	5	3	3	4
Sulejów	gimnazjum	2	a	d	e	c	b	e	e	d	a	a	f	d	e	b	10	b	b	a	a	a	a	a	c	a	a	a,b,c,d	a	b	a	e	a	c	c	b	d	d	c	c	a	d	c	d	5	4	2	5	5
Sulejów	gimnazjum	2	a	e	a	a	a	a	a	a	a	a	a	a	c			a	a	a	a	a	a	a	f	a	a	a,b	a	a	a	c		c	a	a	a	d	b	b	c	c	c	c	4	5	3	3	4
Sulejów	gimnazjum	2	a	d	e	c	b	e	e	d	a	a	f	d	e	b	10	b	b	a	a	a	a	a	c	a	a	a,b,c,d	a	b	a	e	a	c	c	b	d	d	c	c	a	d	c	d	5	4	2	5	5
Sulejów	gimnazjum	2	a	d	b	b	f	e	a	e	a	b	e	f	e	b		a	a	c	c	c	e	b	a	c	a	d	b	b	b	f		b	c	b	b	d	c	c	b	c	c	c	4	2	2	2	4
Sulejów	gimnazjum	2	a	e	a	a	a	a	a	a	a	b	a	a	e	b		a	a	c	c	c	e	b	a	c	a	d	b	b	b	f		b	c	b	b	d	c	c	b	c	c	c	4	2	2	2	4
Sulejów	gimnazjum	2	a	e	a	a	a	a	a	a	a	b	a	a	e	b		a	a	c	c	c	e	b	a	c	a	d	b	b	b	f		b	c	b	b	d	c	c	b	c	c	c	4	2	2	2	4
Sulejów	gimnazjum	2	a	e	a	a	a	a	a	a	b	a	a	a	e	b	16	a	e	a	a	a	a,b	a	a	e	a	b	a	a	a	e	a	a	b	a	c	c	b	b	b	d	b	c	5	5	4	4	5
Sulejów	gimnazjum	2	a	e	b	b	g	h16	a		b	a	b	f	e	b	10	a	e	c	c	c	e	a	a	a	b			b	c	c		d	b	b	b	d	c	c	c	d	b	d	4	2	3	3	4
Sulejów	gimnazjum	1	a	d	b	b	d	e	b	b	b	a	e	f	e	c	10	a	a	a	a	a	a	a	d	a	a	a,b,c,d	a	b	a	e	a	a	b	a	a	c	b	b	c	d	b	b	5	3	5	5	5
Sulejów	gimnazjum	1	a	d	b	c	g	c	a	b	a	b	f	f	e	b			b	c	c	c	e	a	e	a	a	a,c,d	c	a	a	e	a	a	c	b	d	d	c	c	c	d	c	d	5	5	3	4	4
Sulejów	gimnazjum	1	a	d	b	b	d	e	b	b	b	a	e	f	e	c	10	a	a	a	a	a	a	a	d	a	a	a,b,c,d	a	b	a	e	a	a	b	a	a	c	b	b	c	d	b	b	5	3	5	5	5
Sulejów	gimnazjum	1	a	d	a	a	a	a	a	a	b	a	a	a	e	c	10	a	a	a	a	a	a	a	d	a	a	a,b,c,d	a	b	a	e	a	a	b	a	a	c	b	b	c	d	b	b	5	3	5	5	5
Sulejów	gimnazjum	1	a	d	a	a	a	a	a	a	b	a	a	a	e	c	10	a	a	a	a	a	a	a	d	a	a	a,b,c,d	a	b	a	e	a	a	b	a	a	c	b	b	c	d	b	b	5	3	5	5	5
Sulejów	gimnazjum	1	a	d	a	a	a	a	a	a	a	g	a	a	e	c		a	a	b	a	a	b	a	c	b	a	a,b,d	a	a	c	d	a	a	b	a	d	a	b	b	c	d	b	d	5	5	4	5	5
Sulejów	gimnazjum	1	a	e	a	a	a	a	a	a	a	g	a	a	e	b		a	e	a	a	a	a,b	a	b	a	a	b,c,d	c	c	a	e	a	a	c	a	c	d	b	b	c	d	c	d	5	5	3	5	5
Sulejów	gimnazjum	1	a	b	a	a	a	a	a	a	a	b	a	a	e	a		a	a	a	a	a	b	b	f	a	a	c	c	a	c	e	a	a	c	a	c	c	c	c	b	d	b	d	5	5	5	5	5
Sulejów	gimnazjum	1	a	d	a	a	a	a	a	a	b	a	a	a	e	c		a	e	a	a	a	b	a	f	f	a	a,b,c,d	c	c	a	e	a	c	a	a	a	c	c	c	b	c	b	c	4	4	3	4	4
Sulejów	gimnazjum	1	a	d	a	a	a	a	a	a	a	g	a	a	e	c		a	a	b	a	a	b	a	c	b	a	a,b,d	a	a	c	d	a	a	b	a	d	a	b	b	c	d	b	d	5	5	4	5	5
Sulejów	gimnazjum	1	a	e	a	a	a	a	a	a	a	g	a	a	e	b		a	e	a	a	a	a,b	a	b	a	a	b,c,d	c	c	a	e	a	a	c	a	c	d	b	b	c	d	c	d	5	5	3	5	5
Sulejów	gimnazjum	1	a	d	b	b	b	b	b	b	a	g	c	f	e	c		a	a	b	a	a	b	a	c	b	a	a,b,d	a	a	c	d	a	a	b	a	d	a	b	b	c	d	b	d	5	5	4	5	5
Sulejów	gimnazjum	1	a	e	a	a	a	a	a	a	a	g	a	a	e	b		a	e	a	a	a	a,b	a	b	a	a	b,c,d	c	c	a	e	a	a	c	a	c	d	b	b	c	d	c	d	5	5	3	5	5
Sulejów	gimnazjum	1	a	e	a	a	a	a	a	a	a	e	a	a	e	c		a	b	c	c	c	e	a	f	f	a	a,b,c,d	c	c	c	g		a	c	a	d	c	c	c	b	c	c	c	5	3	4	4	4
Wolbórz	gimnazjum	1	b	a	a	a	a	a	a	a	b	a	a	a	e	b	0	a	b	a	a	a	b	b	f	a	a	a,b,c,d	a	b	a	e	a	c	a	a	a	a	c	c	c	d	b	d	5	5	4	5	5
Wolbórz	gimnazjum	1	b	a	a	a	a	a	a	a	b	a	a	a	e	b	0	a	b	a	a	a	b	b	f	a	a	a,b,c,d	a	b	a	e	a	c	a	a	a	a	c	c	c	d	b	d	5	5	4	5	5
Wolbórz	gimnazjum	1	b	a	a	a	a	a	a	a	b	a	a	a	e	b	0	a	b	a	a	a	b	b	f	a	a	a,b,c,d	a	b	a	e	a	c	a	a	a	a	c	c	c	d	b	d	5	5	4	5	5
Wolbórz	gimnazjum	1	b	a	a	a	a	a	a	a	a	a	a	a	e	c	0	a	e	a	a	c	b	a	a	f	c			c	c	e	a	d	a	b	c	c	b	b	a	d	c	a	5	1	2	3	5
Wolbórz	gimnazjum	1	b	a	a	a	a	a	a	a	a	a	a	a	e	c	0	a	e	a	a	c	b	a	a	f	c			c	c	e	a	d	a	b	c	c	b	b	a	d	c	a	5	1	2	3	5
Wolbórz	gimnazjum	1	b	a	a	a	a	a	a	a	b	a	a	a	e	b	0	a	e	a	a	a	b	a	e	a	a	c,d	b	a	c	e	a	a	a	a	a	b	b	b	b	d	c	d	4	2	3	4	5
Wolbórz	gimnazjum	1	b	a	a	a	a	a	a	a	b	a	a	a	e	b	0	a	e	a	a	a	b	a	f	a	a	a	c	c	a	e	b	a	a	a	a	a	b	b	b	d	a	d	5	5	4	3	5
Wolbórz	gimnazjum	1	b	a	a	a	a	a	a	a	b	a	a	a	e	b	0	a	b	a	a	a	b	b	f	a	a	a,b,c,d	a	b	a	e	a	c	a	a	a	a	c	c	c	d	b	d	5	5	4	5	5
Wolbórz	gimnazjum	1	b	a	a	a	a	a	a	a	b	a	a	a	e	b	0	a	b	a	a	a	b	b	f	a	a	a,b,c,d	a	b	a	e	a	c	a	a	a	a	c	c	c	d	b	d	5	5	4	5	5
Wolbórz	gimnazjum	1	b	a	a	a	a	a	a	a	b	a	a	a	e	b	0	a	b	a	a	a	b	b	f	a	a	a,b,c,d	a	b	a	e	a	c	a	a	a	a	c	c	c	d	b	d	5	5	4	5	5
Wolbórz	gimnazjum	1	b	a	a	a	a	a	a	a	a	a	a	a	e	c	0	a	e	a	a	c	b	a	a	f	c			c	c	e	a	d	a	b	a	c	b	b	a	d	c	a	5	1	2	3	5
Wolbórz	gimnazjum	1	a	c	a	a	a	a	a	a	b	a	a	a	e	c	0	a	e	a	a	c	b	a	a	f	c			c	c	e	a	d	a	b	c	c	b	b	a	d	c	a	5	1	2	3	5
Wolbórz	gimnazjum	1	b	a	a	a	a	a	a	a	b	a	a	a	e	b	0	a	e	a	a	a	b	a	e	a	a	c,d	b	a	c	e	a	a	a	a	a	b	b	b	b	d	c	d	4	2	3	4	5
Wolbórz	gimnazjum	1	b	a	a	a	a	a	a	a	b	a	a	a	e	b	0	a	e	a	a	a	b	a	f	a	a	a	c	c	a	e	b	a	a	a	a	a	b	b	b	d	a	d	5	5	4	3	5
Wolbórz	gimnazjum	1	a	c	a	a	a	a	a	a	b	a	a	a	e	c		a	e	a	c	c	e	c	e	f	a	a,b,c	a	a	c	e	a	c	a	a	a	c	c	c	c	d	b	d	5	4	3	4	4
Wolbórz	gimnazjum	1	b	a	a	a	a	a	a	a	b	a	a	a	e	a	5	a	c	a	a	a	b	a	b	b	a	b,c,d	a	a	c	g		c	a	a	a	b	c	c	a	d	b	d	5	5	5	5	5
Wolbórz	gimnazjum	1	a	c	a	a	a	a	a	a	b	a	a	a	d			a	a	a	b	a	b	b	a	a	b			a	b	d	a	a	a	a	a	a	b	b	c	d	c	d	4	3	3	4	4
Wolbórz	gimnazjum	1	a	c	a	a	a	a	a	a	b	a	a	a	d			a	a	a	b	a	b	b	a	a	b			a	b	d	a	a	a	a	a	a	b	b	c	d	c	d	4	3	3	4	4
Wolbórz	gimnazjum	1	b	a	a	a	a	a	a	a	b	a	a	a	e	c		a	e	a	c	c	e	c	e	f	a	a,b,c	a	a	c	e	a	c	a	a	a	c	c	c	c	d	b	d	5	4	3	4	4
Wolbórz	gimnazjum	1	a	c	a	a	a	a	a	a	a	g	a	a	g			a	a	c	c	c	e	c	a	f	c			c	c	g		a	d	a	d	d	b	a	b	a	d	b	2	5	3	5	3
Wolbórz	gimnazjum	1	b	a	a	a	a	a	a	a	b	a	a	a	e	a	5	a	c	a	a	a	b	a	b	b	a	b,c,d	a	a	c	g		c	a	a	a	b	c	c	a	d	b	d	5	5	5	5	5
Wolbórz	gimnazjum	1	b	a	a	a	a	a	a	a	b	a	a	a	e	c		a	e	a	c	c	e	c	e	f	a	a,b,c	a	a	c	e	a	c	a	b	a	c	c	c	c	d	b	d	5	4	3	4	4
Wolbórz	gimnazjum	1	a	c	a	a	a	a	a	a	b	a	a	a	e	c		a	e	a	c	c	e	c	e	f	a	a,b,c	a	a	c	e	a	c	a	b	a	c	c	c	c	d	b	d	5	4	3	4	4
Wolbórz	gimnazjum	1	a	c	a	a	a	a	a	a	a	g	a	a	g			a	a	c	c	c	e	c	a	f	c			c	c	g		a	d	a	d	d	b	a	b	a	d	b	2	5	3	5	3
Wolbórz	gimnazjum	1	a	c	a	a	a	a	a	a	a	g	a	a	g			a	a	c	c	c	e	c	a	f	c			c	c	g		a	d	a	d	d	b	a	b	a	d	b	2	5	3	5	3
Wolbórz	gimnazjum	1	b	a	a	a	a	a	a	a	b	a	a	a	g			a	e	a	a	a	e	a	e	c	a	c	a	a	c	c		a	a	b	a	a	c	c	c	d	b	d	4	4	5	5	5
Wolbórz	gimnazjum	1	b	a	a	a	a	a	a	a	b	a	a	a	e	b	0	a	b	a	a	a	b	b	f	a	a	a,b,c,d	a	b	a	e	a	c	a	a	a	a	c	c	c	d	b	d	5	5	4	5	5
Wolbórz	gimnazjum	1	b	a	a	a	a	a	a	a	b	a	a	a	e	b	0	a	b	a	a	a	b	b	f	a	a	a,b,c,d	a	b	a	e	a	c	a	a	a	a	c	c	c	d	b	d	5	5	4	5	5
Wolbórz	gimnazjum	1	b	a	a	a	a	a	a	a	b	a	a	a	e	b	0	a	b	a	a	a	b	b	f	a	a	a,b,c,d	a	b	a	e	a	c	a	a	a	a	c	c	c	d	b	d	5	5	4	5	5
Wolbórz	gimnazjum	1	b	a	a	a	a	a	a	a	a	a	a	a	e	c	0	a	e	a	a	c	b	a	a	f	c			c	c	e	a	d	a	b	c	c	b	b	a	d	c	a	5	1	2	3	5
Wolbórz	gimnazjum	1	b	a	a	a	a	a	a	a	a	a	a	a	e	c	0	a	e	a	a	c	b	a	a	f	c			c	c	e	a	d	a	b	a	c	b	b	a	d	c	a	5	1	2	3	5
Wolbórz	gimnazjum	1	b	a	a	a	a	a	a	a	b	a	a	a	e	b	0	a	e	a	a	a	b	a	e	a	a	c,d	b	a	c	e	a	a	a	a	a	b	b	b	b	d	c	d	4	2	3	4	5
Wolbórz	gimnazjum	1	b	a	a	a	a	a	a	a	b	a	a	a	e	b	0	a	e	a	a	a	b	a	f	a	a	a	c	c	a	e	b	a	a	a	a	a	b	b	b	d	a	d	5	5	4	3	5
Wolbórz	gimnazjum	1	b	a	a	a	a	a	a	a	b	a	a	a	e	b	0	a	b	a	a	a	b	b	f	a	a	a,b,c,d	a	b	a	e	a	c	a	a	a	a	c	c	c	d	b	d	5	5	4	5	5
Wolbórz	gimnazjum	1	b	a	a	a	a	a	a	a	b	a	a	a	e	b	0	a	b	a	a	a	b	b	f	a	a	a,b,c,d	a	b	a	e	a	c	a	a	a	a	c	c	c	d	b	d	5	5	4	5	5
Wolbórz	gimnazjum	1	b	a	a	a	a	a	a	a	b	a	a	a	e	b	0	a	b	a	a	a	b	b	f	a	a	a,b,c,d	a	b	a	e	a	c	a	a	a	a	c	c	c	d	b	d	5	5	4	5	5
Wolbórz	gimnazjum	1	b	a	a	a	a	a	a	a	a	a	a	a	e	c	0	a	e	a	a	c	b	a	a	f	c			c	c	e	a	d	a	b	c	c	b	b	a	d	c	a	5	1	2	3	5
Wolbórz	gimnazjum	1	a	c	a	a	a	a	a	a	a	a	a	a	e	c	0	a	e	a	a	c	b	a	a	f	c			c	c	e	a	d	a	b	c	c	b	b	a	d	c	a	5	1	2	3	5
Wolbórz	gimnazjum	1	b	a	a	a	a	a	a	a	b	a	a	a	e	b	0	a	e	a	a	a	b	a	e	a	a	c,d	b	a	c	e	a	a	a	a	a	b	b	b	b	d	c	d	4	2	3	4	5
Wolbórz	gimnazjum	1	b	a	a	a	a	a	a	a	b	a	a	a	e	b	0	a	e	a	a	a	b	a	f	a	a	a	c	c	a	e	b	a	a	a	a	a	b	b	b	d	a	d	5	5	4	3	5
Wolbórz	gimnazjum	2	b	a	a	a	a	a	a	a	b	a	a	a	c			a	e	a	c	a	b	a	a	f	a	c,d	c	a	a	c		a	a	a	a	b	c	c	a	d	a	c	5	4	2	4	5
Wolbórz	gimnazjum	2	b	a	a	a	a	a	a	a	a	a	a	a	e	c	0	a	e	a	a	c	b	a	a	f	c			c	c	e	a	d	a	b	c	c	b	b	a	d	c	a	5	1	2	3	5
Wolbórz	gimnazjum	2	b	a	a	a	a	a	a	a	b	a	a	a	c			a	e	a	c	a	b	a	a	f	a	c,d	c	a	a	c		a	a	a	a	b	c	c	a	d	a	c	5	4	2	4	5
Wolbórz	gimnazjum	2	b	a	a	a	a	a	a	a	a	a	a	a	e	c	0	a	e	a	c	c	b	a	b	f	a	a,b,c,d	a	a	c	g		c	a	b	a	b	b	b	b	d	a	d	5	5	3	4	5
Wolbórz	gimnazjum	2	a	c	a	a	a	a	a	a	b	a	a	a	e	c	0	a	e	d	c	c	e	a	f	f	a	b,c,d	a	c	c	g		c	a	a	a	b	b	b	b	a	a	c	1	3	3	4	4
Wolbórz	gimnazjum	2	b	a	a	a	a	a	a	a	b	a	a	a	e	c	0	a	c	c	c	c	b	a	f	f	a	b,c,d	a	c	c	g		a	a	a	a	b	b	b	b	d	a	c	5	4	3	4	4
Wolbórz	gimnazjum	2	b	a	a	a	a	a	a	a	b	a	a	a	e	c	0	a	b	a	c	a	b	a	e	f	c			a	a	e	a	a	a	a	a	a	c	b	c	d	b	c	5	5	5	5	5
Wolbórz	gimnazjum	2	a	c	a	a	a	a	a	a	a	a	a	a	e	c	0	a	b	a	c	a	b	a	f	b	a	a	b	c	a	e	a	b	b	a	a	b	c	b	a	d	b	d	5	5	3	5	5
Wolbórz	gimnazjum	2	b	a	a	a	a	a	a	a	b	a	a	a	c			a	e	a	c	a	b	a	a	f	a	c,d	c	a	a	c		a	a	a	a	b	c	c	a	d	a	c	5	4	2	4	5
Wolbórz	gimnazjum	2	b	a	a	a	a	a	a	a	a	a	a	a	e	c	0	a	e	a	a	c	b	a	a	f	c			c	c	e	a	d	a	b	c	c	b	b	a	d	c	a	5	1	2	3	5
Wolbórz	gimnazjum	2	b	a	a	a	a	a	a	a	b	a	a	a	c			a	e	a	c	a	b	a	a	f	a	c,d	c	a	a	c		a	a	a	a	b	c	c	a	d	a	c	5	4	2	4	5
Wolbórz	gimnazjum	2	b	a	a	a	a	a	a	a	a	a	a	a	e	c	0	a	e	a	c	c	b	a	b	f	a	a,b,c,d	a	a	c	g		c	a	b	a	c	b	b	b	d	a	d	5	5	3	4	5
Wolbórz	gimnazjum	2	a	c	a	a	a	a	a	a	b	a	a	a	e	c	0	a	e	d	c	c	e	a	f	f	a	b,c,d	a	c	c	g		c	a	a	a	b	b	b	b	a	a	c	1	3	3	4	4
Wolbórz	gimnazjum	2	b	a	a	a	a	a	a	a	b	a	a	a	e	c	0	a	c	c	c	c	b	a	f	f	a	b,c,d	a	c	c	g		a	a	a	a	b	b	b	b	d	a	c	5	4	3	4	4
Wolbórz	gimnazjum	2	b	a	a	a	a	a	a	a	b	a	a	a	e	c	0	a	b	a	c	a	b	a	e	f	c			a	a	e	a	a	a	a	a	a	c	b	c	d	b	c	5	5	5	5	5
Wolbórz	gimnazjum	2	a	c	a	a	a	a	a	a	a	a	a	a	e	c	0	a	b	a	c	a	b	a	f	b	a	a	b	c	a	e	a	b	b	a	a	a	c	b	a	d	b	d	5	5	3	5	5
Wolbórz	gimnazjum	2	b	a	a	a	a	a	a	a	b	a	a	a	e	a	0	a	e	c	a	a	b	a	f	d	a	b,c,d	a	c	c	g		a	c	a	a	b	b	b	c	d	a	c	5	4	2	5	5
Wolbórz	gimnazjum	2	b	a	a	a	a	a	a	a	b	a	a	a	e	a	0	a	d	b	b	d	b	b	a	c	a	b	b	a	b	e	b	a	a	b	a	a	c	b	c	d	b	d	5	5	5	5	5
Wolbórz	gimnazjum	2	b	a	a	a	a	a	a	a	a	b	a	a	e	b	0	a	b	b	b	b	e	b	a	b	b			b	a	g		b	c	b	c	d	c	c	c	c	b	c	5	5	5	5	5
Wolbórz	gimnazjum	2	a	c	a	a	a	a	a	a	b	a	a	a	c			a	e	c	c	a	b	b	a	b	a	a	c	c	b	c		b	a	a	a	a	c	b	b	c	b	a	4	1	3	3	4
Wolbórz	gimnazjum	2	b	a	a	a	a	a	a	a	b	a	a	a	e	a	0	a	e	a	a	a	b	a	e	e	a	abcd	a	a	c	f		a	a	a	a	a	b	b	b	d	c	d	5	5	3	5	5
Wolbórz	gimnazjum	2	b	a	a	a	a	a	a	a	b	a	a	a	e	a	0	a	e	a	a	a	b	a	f	d	a	c,d	a	a	a	f		a	a	a	a	a	b	b	b	d	b	d	5	4	3	4	5
Wolbórz	gimnazjum	2	b	a	a	a	a	a	a	a	b	a	a	a	c			a	e	a	c	c	e	c	a	a	a	a,b,c,d	c	a	a	g		a	a	a	a	a	b	b	b	d	a	d	4	3	3	3	4
Wolbórz	gimnazjum	2	b	a	a	a	a	a	a	a	b	a	a	a	c			a	e	a	c	c	e	c	a	d	a	a,b,c,d	c	a	a	g		a	a	a	a	c	b	b	b	a	b	c	4	3	3	3	4
Wolbórz	gimnazjum	2	b	a	a	a	a	a	a	a	b	a	a	a	e	c	0	a	e	c	c	c	e	a	f	f	a	a	c	c	c	e	b	c	a	b	a	b	b	b	b	d	b	d	5	5	5	5	5
Wolbórz	gimnazjum	2	b	a	a	a	a	a	a	a	b	a	a	a	d			a	e	b	c	c	e	c	c	e	c			c	c	a		a	a	b	a	a	b	b	c	a	a	a	1	1	1	1	1
Wolbórz	gimnazjum	2	b	a	a	a	a	a	a	a	a	b	a	a	e	c	0	a	e	a	a	a	a,b	b	a	a	b			a	c	e	a	d	c	b	a	a	b	b	a	d	b	d	5	5	5	5	5
Wolbórz	gimnazjum	2	b	a	a	a	a	a	a	a	b	a	a	a	e	c	0	a	e	a	a	a	a	c	f	f	a	a,b,c,d	a	a	c	g		c	a	a	a	a	b	b	a	d	c	c	5	4	3	4	5
Wolbórz	gimnazjum	3	b	a	a	a	a	a	a	a	b	a	a	a	e	c	0	a	e	a	a	a	a	a	a	f	a	a,b,c,d	a	a	c	g		a	a	a	a	a	b	b	b	a	c	a	5	5	5	5	5
Wolbórz	gimnazjum	3	b	a	a	a	a	a	a	a	b	a	a	a	e	a	0	a	e	a	a	a	b	a	e	e	a	abcd	a	a	c	f		a	a	a	a	a	b	b	b	d	c	d	5	5	3	5	5
Wolbórz	gimnazjum	3	b	a	a	a	a	a	a	a	b	a	a	a	e	a	0	a	e	a	a	a	b	a	f	d	a	c,d	a	a	a	f		a	a	a	a	a	b	b	b	d	b	d	5	4	3	4	5
Wolbórz	gimnazjum	3	b	a	a	a	a	a	a	a	b	a	a	a	c			a	e	a	c	c	e	c	a	a	a	a,b,c,d	c	a	a	g		a	a	a	a	a	b	b	b	d	a	d	4	3	3	3	4
Wolbórz	gimnazjum	3	b	a	a	a	a	a	a	a	b	a	a	a	c			a	e	a	c	c	e	c	a	d	a	a,b,c,d	c	a	a	g		a	a	a	a	c	b	b	b	a	b	c	4	3	3	3	4
Wolbórz	gimnazjum	3	b	a	a	a	a	a	a	a	b	a	a	a	e	c	0	a	e	c	c	c	e	a	f	f	a	a	c	c	c	e	b	c	a	b	a	b	b	b	b	d	b	d	5	5	5	5	5
Wolbórz	gimnazjum	3	a	c	a	a	a	a	a	a	a	g	a	a	g			a	a	c	c	c	e	c	a	f	c			c	c	g		a	d	a	d	d	b	a	b	a	d	b	5	2	4	3	3
Wolbórz	gimnazjum	3	b	a	a	a	a	a	a	a	b	a	a	a	d			a	e	b	c	c	e	c	c	e	c			c	c	a		a	a	b	a	a	b	b	c	a	a	a	1	1	1	1	1
Wolbórz	gimnazjum	3	b	a	a	a	a	a	a	a	b	a	a	a	e	a	0	a	e	a	a	a	b	a	e	c	a	a,c,d	a	c	a	e	a	a	b	a	b	c	c	b	b	d	b	d	5	5	4	4	5
Wolbórz	gimnazjum	3	b	a	a	a	a	a	a	a	b	a	a	a	e	a	0	a	e	a	a	a	e	a	f	f	a	a,b,c	a	a	a	e	a	a	b	b	b	b	c	b	b	a	b	d	5	5	4	4	5
Wolbórz	gimnazjum	3	a	c	a	a	a	a	a	a	a	b	a	a	e	c	0	a	e	a	a	a	a,b	b	a	a	b			a	c	e	a	d	c	b	a	a	b	b	a	d	b	d	5	5	5	5	5
Wolbórz	gimnazjum	2	b	a	a	a	a	a	a	a	a	b	a	a	e	b	0	a	d	a	a	a	b	a	b	c	a	c	a	a	a	e	a	a	b	b	b	c	c	b	b	d	b	c	5	3	3	4	5
Wolbórz	gimnazjum	2	b	a	a	a	a	a	a	a	b	a	a	a	e	a	0	a	e	a	a	a	d	a	c	d	a	a	c	a	b	g		c	a	a	a	a	b	b	c	d	a	d	5	5	5	5	5
Wolbórz	gimnazjum	2	b	a	a	a	a	a	a	a	b	a	a	a	c			a	e	a	a	a	a	a	c	f	c			c	c	g		d	c	a	c	d	c	b	c	d	b	b	4	3	3	3	3
Wolbórz	gimnazjum	2	a	c	a	a	a	a	a	a	b	a	a	a	c			a	e	c	c	a	e	c	f	f	c			c	c	g		c	c	b	d	c	c	c	c	b	b	c	3	3	3	1	3
Wolbórz	gimnazjum	2	a	c	a	a	a	a	a	a	b	a	a	a	c			a	e	a	a	b	a	a	d	b	a	c	a	a	a	e	a	b	a	a	a	a	c	b	a	d	b	d	4	4	4	4	4
Wolbórz	gimnazjum	2	b	a	a	a	a	a	a	a	b	a	a	a	g			a	e	a	a	a	b	b	f	a	a	b	a	a	c	g		a	a	a	a	a	c	c	c	c	b	c	5	4	3	3	5
Wolbórz	gimnazjum	2	a	c	a	a	a	a	a	a	b	a	a	a	d			a	e	a	c	a	e	a	e	f	a	b	a	a	a	d	a	b	b	b	a	a	b	a	a	d	b	d	4	4	4	4	4
Wolbórz	gimnazjum	2	b	a	a	a	a	a	a	a	b	a	a	a	d			a	e	c	c	c	e	a	f	f	c			c	c	g		d	a	c	a	c	b	b	b	d	b	d	5	3	3	4	5
Wolbórz	gimnazjum	2	a	c	a	a	a	a	a	a	b	a	a	a	f			a	e	c	c	c	e	a	b	a	c			a	a	g		b	c	b	c	d	c	c	c	d	b	d	5	5	3	4	5
Wolbórz	gimnazjum	2	b	a	a	a	a	a	a	a	a	a	a	a	a			a	b	a	a	a	b	a	b	b	a	b,c	a	a	c	e	a	b	b	b	b	b	a	b	b	d	b	b	5	5	4	4	5
Wolbórz	gimnazjum	2	b	a	a	a	a	a	a	a	b	a	a	a	c			a	e	a	c	a	e	b	e	e	a	d	b	c	c	g		a	a	a	a	a	c	b	c	d	b	d	4	2	2	3	3
Wolbórz	gimnazjum	2	b	a	a	a	a	a	a	a	b	a	a	a	e	c	0	a	e	c	c	c	a,b	b	b	f	a	a,b,c,d	c	a	a	e	a	a	a	b	b	b	c	b	c	d	b	c	5	4	3	4	4
Wolbórz	gimnazjum	2	b	a	a	a	a	a	a	a	b	a	a	a	e	a	0	a	e	a	a	a	a	c	f	f	c			c	b	f		a	a	b	a	c	c	c	c	d	a	c	5	4	3	4	4
Wolbórz	gimnazjum	2	b	a	a	a	a	a	a	a	b	a	a	a	g			a	d	a	a	a	b	b	d	d	a	a,b,c,d	c	b	a	f		a	a	b	a	b	b	b	c	d	b	d	5	5	4	2	5
Wolbórz	gimnazjum	2	b	a	a	a	a	a	a	a	b	a	a	a	e	b	0	a	e	a	a	a	a,b,c,d	c	f	f	a	a,b,c,d	a	a	a	f		a	a	a	a	a	c	b	b	a	a	c	5	5	3	5	5
Wolbórz	gimnazjum	2	a	c	a	a	a	a	a	a	a	g	a	a	g			a	a	c	c	c	e	c	a	f	c			c	c	g		a	d	a	d	d	b	a	b	a	d	b	5	2	4	3	3
Wolbórz	gimnazjum	3	b	a	a	a	a	a	a	a	b	a	a	a	e	b	0	a	e	a	a	a	a	a	f	d	a	b	c	b	b	g		c	b	b	b	c	c	c	b	d	b	c	4	4	3	4	4
Wolbórz	gimnazjum	3	b	a	a	a	a	a	a	a	b	a	a	a	e	c	0	a	e	c	c	c	a,b	b	b	f	a	a,b,c,d	c	a	a	e	a	a	a	b	b	b	c	b	c	d	b	c	5	4	3	4	4
Wolbórz	gimnazjum	3	b	a	a	a	a	a	a	a	b	a	a	a	e	a	0	a	e	a	a	a	a	c	f	f	c			c	b	f		a	a	b	a	c	c	c	c	d	a	c	5	4	3	4	4
Wolbórz	gimnazjum	3	b	a	a	a	a	a	a	a	b	a	a	a	g			a	d	a	a	a	b	b	d	d	a	a,b,c,d	c	b	a	f		a	a	b	a	b	b	b	c	d	b	d	5	5	4	2	5
Wolbórz	gimnazjum	3	b	a	a	a	a	a	a	a	b	a	a	a	e	b	0	a	e	a	a	a	a,b,c,d	c	f	f	a	a,b,c,d	a	a	a	f		a	a	a	a	a	c	b	b	a	a	c	5	5	3	5	5
[truncated: 727 more rows]
[truncated: 57 more columns]
